# Supplementary material for: I 2 -mediated convenient ring-opening of simple gem -difluorocyclopropanes
Source: Royal Society of Chemistry journal article supplement (doi:10.1039/d5ob00128e), 2025-01-01

Supporting Information

***I<sub>2</sub>-mediated convenient ring-opening of simple gem-difluorocyclopropanes***

Toshihito Goto, Sakuya Shirai, Tomohiro Agou, Tomoko Kawasaki-Takasuka,\* Takashi Yamazaki

Division of Applied Chemistry, Institute of Engineering, Tokyo University of Agriculture and  
Technology, 2-24-16 Nakamachi, Koganei, 184-8588 (Japan), Tel/Fax +81-42-388-7038.

E-mail: [takasuka@cc.tuat.ac.jp](mailto:takasuka@cc.tuat.ac.jp)

|                                                                     |            |
|---------------------------------------------------------------------|------------|
| <b><i>Preparation of gem-difluorocyclopropanes</i></b> .....        | <b>S2</b>  |
| <b><i>General Procedure of Iodohydroxylation</i></b> .....          | <b>S15</b> |
| <b><i>General Procedure of Iodoalkoxylation</i></b> .....           | <b>S26</b> |
| <b><i>General Procedure of Iodosulfenylation</i></b> .....          | <b>S30</b> |
| <b><i>General Procedure of Iodoarylation</i></b> .....              | <b>S35</b> |
| <b><i>Control experiment</i></b> .....                              | <b>S42</b> |
| <b><i>Transformation of the ring-opening products</i></b> .....     | <b>S44</b> |
| <b><i>X-Ray Crystallographic Data for the Compound 2s</i></b> ..... | <b>S49</b> |
| <b><i>References</i></b> .....                                      | <b>S57</b> |
| <b><i>NMR spectra of the substrates</i></b> .....                   | <b>S58</b> |
| <b><i>NMR spectra of the products</i></b> .....                     | <b>S68</b> |

## Preparation of gem-difluorocyclopropanes

### Method A

To a mixture of KI (2.0 or 4.0 equiv) and an alkene (1.0 equiv) in EtCN (1.0 M to alkene) was added methyl 2,2-difluoro-2-(fluorosulfonyl)acetate (MDFA, 2.0 or 4.0 equiv) at room temperature, and the resultant solution was stirred at 50 °C (oil bath temperature) for 24 h. After cooling to room temperature, the reaction mixture was quenched by water and extracted by hexane three times. The combined hexane layer was successively washed with water, saturated aqueous NaHCO<sub>3</sub>, and brine. After drying over anhydrous Na<sub>2</sub>SO<sub>4</sub>, followed by concentration under reduced pressure, the crude product was purified by silica gel column chromatography.

### Method B

To a mixture of NaI (0.2 equiv) and an alkene (1.0 equiv) in anhydrous THF (3.4 M to alkene) under argon atmosphere was added TMSCF<sub>3</sub> (2.5 equiv), and the resultant solution was stirred at 65 °C (oil bath temperature) until the starting material was disappeared (judged by TLC). After cooling to room temperature and evaporation to dryness under reduced pressure, water (20 mL) was added to the residue, which was extracted by Et<sub>2</sub>O three times. The combined extract was washed with water, saturated aqueous Na<sub>2</sub>S<sub>2</sub>O<sub>3</sub>, and brine. After drying over anhydrous Na<sub>2</sub>SO<sub>4</sub> and concentration, the crude product was purified by silica gel column chromatography.

1-(2,2-Difluorocyclopropyl)-4-methoxybenzene (**1a**) [52178-85-5]<sup>1</sup>

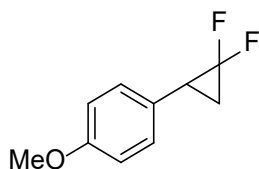

**Method B**, 3.66 g (19.84 mmol, 95%).

Colorless oil.

R<sub>f</sub> = 0.31 (hexane:Et<sub>2</sub>O = 25:1).

<sup>1</sup>H NMR (CDCl<sub>3</sub>) δ 7.16 (2H, d, *J* = 8.3 Hz), 6.87 (2H, d, *J* = 8.3 Hz), 3.80 (3H, s), 2.77-2.66 (1H, m), 1.85-1.72 (1H, m), 1.61-1.50 (1H, m) ppm.

<sup>13</sup>C NMR (CDCl<sub>3</sub>) δ 158.7, 129.2, 125.6, 113.9, 112.7 (dd, *J* = 286.3, 283.2 Hz), 55.2, 26.4 (t, *J* = 11.2 Hz), 16.9 (dd, *J* = 10.8, 10.2 Hz) ppm.

<sup>19</sup>F NMR (CDCl<sub>3</sub>) δ -127.30 ~ -127.93 (1F, m), -141.66 ~ -142.25 (1F, m) ppm.

1-(2,2-Difluorocyclopropyl)-3-methoxybenzene (**1b**) [2641779-74-8]<sup>2</sup>

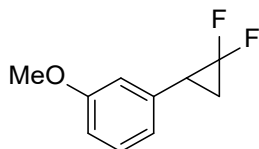

**Method B**, 1.73 g (9.39 mmol, 91%).

Pale yellow oil.

R<sub>f</sub> = 0.30 (hexane:Et<sub>2</sub>O = 50:1).

<sup>1</sup>H NMR (CDCl<sub>3</sub>) δ 7.24 (1H, t, *J* = 7.8 Hz), 6.83-6.76 (3H, m), 3.80 (3H, s), 2.73 (1H, ddd, *J* = 13.2, 11.7, 8.1 Hz), 1.80 (1H, dddd, *J* = 12.6, 11.7, 7.8, 4.8 Hz), 1.61 (1H, dddd, *J* = 12.6, 11.7, 7.8, 3.9 Hz) ppm.

<sup>13</sup>C NMR (CDCl<sub>3</sub>) δ 159.6, 135.1, 129.4, 120.3, 113.1, 112.53 (dd, *J* = 286.0, 282.2 Hz), 112.46, 55.1, 27.2 (t, *J* = 11.8, 10.6 Hz), 16.9 (t, *J* = 11.1, 10.3 Hz) ppm.

<sup>19</sup>F NMR (CDCl<sub>3</sub>) δ -127.93 ~ -128.56 (1F, m), -143.17 ~ -143.76 (1F, m) ppm.

1-(2,2-Difluorocyclopropyl)-2-methoxybenzene (**1c**) [1910105-56-4]<sup>3</sup>

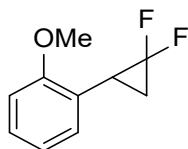

**Method B**, 1.80 g (9.77 mmol, 84%).

Colorless oil.

R<sub>f</sub> = 0.30 (hexane:Et<sub>2</sub>O = 50:1).

<sup>1</sup>H NMR (CDCl<sub>3</sub>) δ 7.26 (1H, td, *J* = 7.8, 1.7 Hz), 7.09 (1H, d, *J* = 7.5 Hz), 6.93 (1H, d, *J* = 7.5 Hz), 6.89 (1H, d, *J* = 7.8 Hz), 3.87 (3H, s), 2.86 (1H, ddd, *J* = 13.2, 12.3, 8.4 Hz), 1.84-1.72 (1H, m), 1.63-1.52 (1H, m) ppm.

<sup>13</sup>C NMR (CDCl<sub>3</sub>) δ 158.7 (d, *J* = 0.6 Hz), 128.4, 127.8 (dd, *J* = 3.1, 1.8 Hz), 122.0, 120.3 (d, *J* = 0.7 Hz), 113.1 (dd, *J* = 286.0, 282.2 Hz), 110.2, 55.4, 22.5 (dd, *J* = 11.8, 10.6 Hz), 15.8 (dd, *J* = 11.1, 10.3 Hz) ppm.

<sup>19</sup>F NMR (CDCl<sub>3</sub>) δ -127.93 ~ -128.56 (1F, m), -143.17 ~ -143.76 (1F, m) ppm.

5-(2,2-Difluorocyclopropyl)-1,2,3-trimethoxybenzene (**1d**) [3026542-50-4]<sup>2</sup>

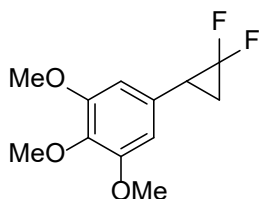

**Method B**, 2.20 g (9.00 mmol, 90%).

White solid.

m.p.: 47.3 - 48.1 °C.

R<sub>f</sub> = 0.27 (hexane:AcOEt = 4:1).

<sup>1</sup>H NMR (CDCl<sub>3</sub>) δ 6.45 (2H, s), 3.86 (6H, s), 3.84 (3H, s), 2.72 (1H, ddd, *J* = 13.2, 11.4, 8.4 Hz), 1.80 (1H, dddd, *J* = 16.5, 12.6, 8.1, 4.8 Hz), 1.64-1.53 (1H, m) ppm.

<sup>13</sup>C NMR (CDCl<sub>3</sub>) δ 153.2, 137.2, 129.2, 112.5 (dd, *J* = 286.0, 283.4 Hz), 105.2, 60.8, 56.0, 27.3 (t, *J* = 11.1 Hz), 17.1 (t, *J* = 10.6 Hz) ppm.

<sup>19</sup>F NMR (CDCl<sub>3</sub>) δ -126.64 ~ -127.30 (1F, m), -142.73 ~ -143.33 (1F, m) ppm.

**Preparation of 4-(2,2-difluorocyclopropyl)phenol (1e)** [52178-86-6]<sup>4</sup>

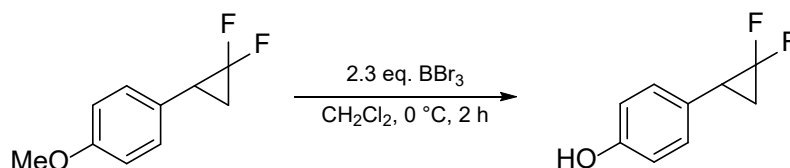

To a mixture of 1-(2,2-difluorocyclopropyl)-4-methoxybenzene 0.5524 g (3.00 mmol) and CH<sub>2</sub>Cl<sub>2</sub> 17 mL under argon atmosphere was added 1 M BBr<sub>3</sub> in CH<sub>2</sub>Cl<sub>2</sub>, 6.9 mL at 0 °C. The reaction mixture was stirred at 0 °C for 2 h, after warming to room temperature, water (20 mL) was added to the residue, which was extracted by CH<sub>2</sub>Cl<sub>2</sub> three times. The combined extract was washed with water, and brine. After drying over anhydrous Na<sub>2</sub>SO<sub>4</sub> and concentration, the crude product was purified by silica gel column chromatography (hexane:AcOEt = 4:1) to obtain 4-(2,2-difluorocyclopropyl)phenol 0.44 g (2.60 mmol, 87%).

White solid.

m.p.: 56.5 - 57.8 °C.

R<sub>f</sub> = 0.31 (hexane:AcOEt = 4:1).

<sup>1</sup>H NMR (CDCl<sub>3</sub>) δ 7.07 (2H, d, *J* = 8.4 Hz), 6.78 (2H, d, *J* = 8.4 Hz), 5.64 (1H, br s), 2.72-2.61 (1H, m), 1.81-1.69 (1H, m), 1.57-1.46 (1H, m) ppm.

<sup>13</sup>C NMR (CDCl<sub>3</sub>) δ 154.4, 129.4, 126.0, 115.4, 112.7 (dd, *J* = 286.6, 283.5 Hz), 26.4 (t, *J* = 11.8 Hz), 16.8 (t, *J* = 10.5 Hz) ppm.

$^{19}\text{F}$  NMR ( $\text{CDCl}_3$ )  $\delta$  -127.22 ~ -127.86 (1F, m), -143.34 ~ -143.94 (1F, m) ppm.

1-(2,2-Difluorocyclopropyl)-4-*tert*-butylbenzene (**1f**) [1241957-35-6]<sup>3</sup>

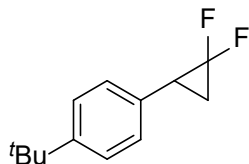

**Method B**, 1.04 g (4.95 mmol, 99%).

Colorless oil.

R<sub>f</sub> = 0.50 (hexane).

$^1\text{H}$  NMR ( $\text{CDCl}_3$ )  $\delta$  7.35 (2H, d,  $J$  = 8.4 Hz), 7.16 (2H, d,  $J$  = 7.8 Hz), 2.72 (1H, m), 1.79 (1H, ddd,  $J$  = 12.0, 7.2, 4.5 Hz), 1.60 (1H, ddd,  $J$  = 12.3, 8.1, 3.9 Hz), 1.31 (9H, s) ppm.

$^{13}\text{C}$  NMR ( $\text{CDCl}_3$ )  $\delta$  150.1, 130.7, 127.7, 125.4, 112.7 (t,  $J$  = 286.6 Hz), 34.5, 31.3, 26.8 (t,  $J$  = 11.2 Hz), 17.0 (d,  $J$  = 10.6 Hz) ppm.

$^{19}\text{F}$  NMR ( $\text{CDCl}_3$ )  $\delta$  -127.16 (1F, dtd,  $J$  = 152.9, 13.8, 4.8 Hz), -143.53 (1F, ddd,  $J$  = 152.6, 12.8, 4.5 Hz) ppm.

(2,2-Difluorocyclopropyl)benzene (**1g**) [13343-40-3]<sup>1</sup>

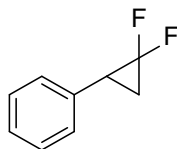

**Method B**, 1.36 g (8.81 mmol, 88%, Purity 90 wt% in THF). This compound **1g** is high volatility, so without further evaporation it was used at the next step.

Pale yellow oil.

R<sub>f</sub> = 0.75 (hexane).

$^1\text{H}$  NMR ( $\text{CDCl}_3$ )  $\delta$  7.34-7.20 (5H, m), 2.79-2.68 (1H, m), 1.86-1.73 (1H, m), 1.66-1.55 (1H, m) ppm.

$^{13}\text{C}$  NMR ( $\text{CDCl}_3$ )  $\delta$  133.7, 128.4, 128.0 (dd,  $J$  = 1.9, 1.2 Hz), 127.1, 112.6 (dd,  $J$  = 285.9, 283.4 Hz), 27.2 (t,  $J$  = 11.2 Hz), 17.0 (t,  $J$  = 10.1 Hz) ppm.

$^{19}\text{F}$  NMR ( $\text{CDCl}_3$ )  $\delta$  -126.84 ~ -127.47 (1F, m), -143.39 ~ -144.00 (1F, m) ppm.

1-Bromo-4-(2,2-difluorocyclopropyl)benzene (**1h**) [1275621-14-1]<sup>1</sup>

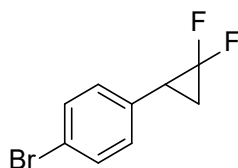

**Method A**, 1.85 g (7.93 mmol, 82%).

Colorless oil.

R<sub>f</sub> = 0.57 (hexane).

<sup>1</sup>H NMR (CDCl<sub>3</sub>) δ 7.44 (2H, d, *J* = 8.1 Hz), 7.09 (2H, d, *J* = 8.4 Hz), 2.75-2.64 (1H, m), 1.90-1.76 (1H, m), 1.64-1.35 (1H, m) ppm.

<sup>13</sup>C NMR (CDCl<sub>3</sub>) δ 132.7, 131.6, 129.7, 121.0, 112.2 (dd, *J* = 286.6, 283.4 Hz), 26.6 (dd, *J* = 11.7, 11.2 Hz), 17.1 (dd, *J* = 10.6, 10.5 Hz) ppm.

<sup>19</sup>F NMR (CDCl<sub>3</sub>) δ -127.09 ~ -127.72 (1F, m), -143.27 ~ -143.89 (1F, m) ppm.

1-(2,2-Difluorocyclopropyl)-4-nitrobenzene (**1i**) [35694-66-7]<sup>5</sup>

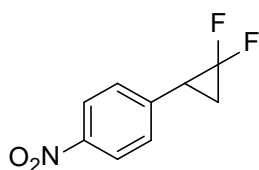

**Method B**, 0.88 g (4.42 mmol, 88%).

Yellow oil.

R<sub>f</sub> = 0.28 (hexane:AcOEt = 10:1).

<sup>1</sup>H NMR (CDCl<sub>3</sub>) δ 8.18 (2H, d, *J* = 8.7 Hz), 7.38 (2H, d, *J* = 8.7 Hz), 2.91-2.80 (1H, m), 2.05-1.93 (1H, m), 1.80-1.69 (1H, m) ppm.

<sup>13</sup>C NMR (CDCl<sub>3</sub>) δ 147.0, 141.4, 128.7 (t, *J* = 1.9 Hz), 123.6, 111.9 (dd, *J* = 287.7, 283.5 Hz), 27.0 (dd, *J* = 12.4, 11.2 Hz), 17.9 (t, *J* = 10.6 Hz) ppm.

<sup>19</sup>F NMR (CDCl<sub>3</sub>) δ -126.40 ~ -127.04 (1F, m), -142.83 ~ -143.44 (1F, m) ppm.

1-(2,2-Difluoro-1-methylcyclopropyl)-4-methoxybenzene (**1j**) [52178-70-8]<sup>5</sup>

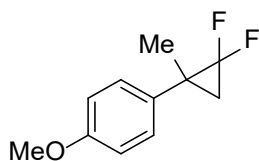

**Method A**, 2.35 g (11.85 mmol, 99%).

Pale yellow oil.

R<sub>f</sub> = 0.57 (hexane:CH<sub>2</sub>Cl<sub>2</sub> = 1:1).

<sup>1</sup>H NMR (CDCl<sub>3</sub>) δ 7.26-7.22 (2H, m), 6.90-6.85 (2H, m), 3.80 (3H, s), 1.63 (1H, ddd, *J* = 13.5, 7.5, 3.6 Hz), 1.49 (3H, dd, *J* = 2.7, 1.8 Hz), 1.36 (1H, ddd, *J* = 12.3, 7.5, 4.2 Hz) ppm.

<sup>13</sup>C NMR (CDCl<sub>3</sub>) δ 158.6, 131.2, 129.4, 114.8 (dd, *J* = 288.7, 286.3 Hz), 113.9, 55.2, 30.5 (dd, *J* = 10.6, 10.0 Hz), 22.5 (dd, *J* = 10.0, 9.9 Hz), 21.5 (d, *J* = 6.2 Hz) ppm.

<sup>19</sup>F NMR (CDCl<sub>3</sub>) δ -133.72 ~ -134.29 (1F, m), -138.67 ~ -139.25 (1F, m) ppm.

1-(2,2-Difluoro-1-methylcycloprop-1-yl)-3-methoxybenzene (**1k**)

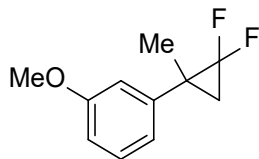

**Method A**, 0.84 g (4.23 mmol, 72%).

Colorless oil.

R<sub>f</sub> = 0.60 (hexane:AcOEt = 4:1).

<sup>1</sup>H NMR (CDCl<sub>3</sub>) δ 7.27 (1H, t, *J* = 7.8 Hz), 6.91 (1H, d, *J* = 7.8 Hz), 6.86-6.85 (1H, m), 6.83-6.80 (1H, m), 3.81 (3H, s), 1.67 (1H, ddd, *J* = 13.8, 7.8, 3.6 Hz), 1.52 (3H, s), 1.39 (1H, ddd, *J* = 12.3, 7.5, 4.5 Hz) ppm.

<sup>13</sup>C NMR (CDCl<sub>3</sub>) δ 159.6, 140.6, 129.5, 120.6 (d, *J* = 1.9 Hz), 114.5 (dd, *J* = 289.4, 286.9 Hz), 114.3 (d, *J* = 2.5 Hz), 55.1, 31.2 (t, *J* = 10.3 Hz), 22.4 (t, *J* = 10.0 Hz), 21.3 (dd, *J* = 6.1, 1.9 Hz) ppm.

<sup>19</sup>F NMR (CDCl<sub>3</sub>) δ -133.87 (1F, dd, *J* = 150.7, 13.7 Hz), -138.73 (1F, dd, *J* = 150.4, 12.6 Hz) ppm.

IR (CHCl<sub>3</sub>) ν 2966, 2937, 2838, 1603, 1470, 1238, 1204, 1048, 1007, 699 cm<sup>-1</sup>.

HRMS (FAB<sup>+</sup>, *m/z*): [M]<sup>+</sup> calcd for C<sub>11</sub>H<sub>12</sub>F<sub>2</sub>O 198.0856; found, 198.0873.

1-(2,2-Difluoro-1-methylcyclopropyl)-2-methoxybenzene (**1l**) [2366981-51-1]<sup>5</sup>

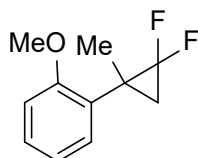

**Method A**, 1.54 g (7.77 mmol, 78%)

Colorless oil.

R<sub>f</sub> = 0.71 (hexane:AcOEt = 4:1).

<sup>1</sup>H NMR (CDCl<sub>3</sub>) δ 7.20-7.26 (2H, m), 6.91 (1H, dt, *J* = 7.2, 1.2 Hz), 6.89 (1H, d, *J* = 8.1 Hz), 3.87 (3H, s), 1.53 (1H, ddd, *J* = 13.5, 7.8, 3.9 Hz), 1.44 (3H, dd, *J* = 2.7, 1.8 Hz), 1.36 (1H, ddd, *J* = 12.3, 7.8, 4.8 Hz) ppm.

<sup>13</sup>C NMR (CDCl<sub>3</sub>) δ 158.5, 129.7, 128.7, 127.5, 120.4, 114.9 (t, *J* = 286.0 Hz), 110.7, 55.4, 28.4 (t, *J* = 10.6 Hz), 22.4 (t, *J* = 10.0 Hz), 19.4 (d, *J* = 5.6 Hz) ppm.

<sup>19</sup>F NMR (CDCl<sub>3</sub>) δ -134.78 (1F, dd, *J* = 150.7, 11.6 Hz), -140.3 (1F, dd, *J* = 150.7, 11.6 Hz) ppm.

1-(2,2-Difluoro-1-methylcycloprop-1-yl)-3,4,5-trimethoxybenzene (**1m**)

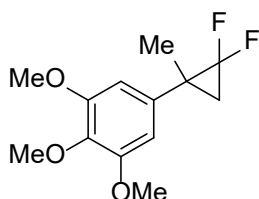

**Method B**, 0.97 g (3.76 mmol, 94%).

Colorless oil.

R<sub>f</sub> = 0.38 (hexane:AcOEt = 4:1).

<sup>1</sup>H NMR (CDCl<sub>3</sub>) δ 6.51 (2H, s), 3.87 (6H, s), 3.84 (3H, s), 1.65 (1H, ddd, *J* = 13.8, 7.5, 3.5 Hz), 1.51 (3H, m), 1.39 (1H, ddd, *J* = 12.0, 7.5, 4.5 Hz) ppm.

<sup>13</sup>C NMR (CDCl<sub>3</sub>) δ 153.1, 137.1, 134.7, 114.5 (t, *J* = 286.6 Hz), 105.4, 60.6, 56.0, 31.4 (t, *J* = 9.9 Hz), 22.7 (t, *J* = 10.0 Hz), 21.4 (d, *J* = 6.2 Hz) ppm.

<sup>19</sup>F NMR (CDCl<sub>3</sub>) δ -133.56 (1F, dd, *J* = 150.4, 13.6 Hz), -138.54 (1F, dd, *J* = 150.7, 13.8 Hz) ppm.

IR (CHCl<sub>3</sub>) ν 2940, 2841, 1589, 1466, 1261, 1238, 1173, 1129, 1007, 493 cm<sup>-1</sup>.

HRMS (FAB<sup>+</sup>, *m/z*): [M+H]<sup>+</sup> calcd for C<sub>13</sub>H<sub>17</sub>F<sub>2</sub>O<sub>3</sub> 259.1146; found, 259.1149.

(2,2-Difluoro-1-methylcyclopropyl)benzene (**1n**) [59164-24-8]<sup>1</sup>

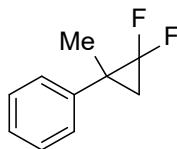

**Method A**, 5.31 g (31.60 mmol, 79%).

Colorless oil.

R<sub>f</sub> = 0.42 (hexane).

<sup>1</sup>H NMR (CDCl<sub>3</sub>) δ 7.37-7.26 (5H, m), 1.68 (1H, ddd, *J* = 13.7, 7.7, 3.6 Hz), 1.52 (3H, dd, *J* = 2.7, 1.8 Hz), 1.40 (1H, ddd, *J* = 12.3, 7.7, 4.5 Hz) ppm.

<sup>13</sup>C NMR (CDCl<sub>3</sub>) δ 139.1 (t, *J* = 2.5 Hz), 128.5, 128.3 (d, *J* = 2.4 Hz), 127.2, 114.5 (dd, *J* = 288.7, 286.9 Hz), 31.2 (dd, *J* = 11.2, 9.3 Hz), 22.5 (t, *J* = 9.9 Hz), 21.4 (dd, *J* = 6.2, 1.8 Hz) ppm.

<sup>19</sup>F NMR (CDCl<sub>3</sub>) δ -133.49 ~ -134.06 (1F, m), -138.50 ~ -139.08 (1F, m) ppm.

1-(2,2-Difluoro-1-methylcyclopropyl)-4-bromobenzene (**1o**) [2138083-44-8]<sup>5</sup>

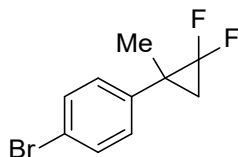



**Method A**, 1.15 g (4.66 mmol, 93%).

Colorless oil.

R<sub>f</sub> = 0.26 (hexane).

<sup>1</sup>H NMR (CDCl<sub>3</sub>) δ 7.51-7.45 (2H, m), 7.26-7.17 (2H, m), 1.64 (1H, ddd, *J* = 13.5, 7.8, 3.6 Hz), 1.49 (3H, dd, *J* = 3.0, 2.1 Hz), 1.42 (1H, ddd, *J* = 12.3, 7.5, 4.5 Hz) ppm.

<sup>13</sup>C NMR (CDCl<sub>3</sub>) δ 138.1 (t, *J* = 1.9 Hz), 131.7, 130.1 (d, *J* = 2.5 Hz), 121.2, 114.1 (dd, *J* = 289.0, 285.4 Hz), 30.6 (dd, *J* = 11.2, 9.3 Hz), 22.5 (t, *J* = 9.9 Hz), 21.1 (dd, *J* = 6.2, 2.5 Hz) ppm.

<sup>19</sup>F NMR (CDCl<sub>3</sub>) δ -133.70 (1F, dd, *J* = 150.5, 11.4 Hz), -138.87 (1F, dd, *J* = 150.5, 11.4 Hz) ppm.

1-(2,2-Difluoro-1-methylcyclopropyl)-4-nitrobenzene (**1p**) [113664-78-1]<sup>5</sup>

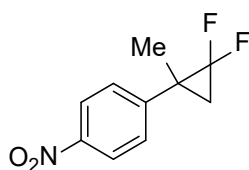

**Method A**, 0.47 g (2.22 mmol, 89%).

White solid.

m.p.: 53.6 - 53.9 °C.

R<sub>f</sub> = 0.20 (hexane:Et<sub>2</sub>O = 25:1).

<sup>1</sup>H NMR (CDCl<sub>3</sub>) δ 8.11 (2H, d, *J* = 8.7 Hz), 7.41 (2H, d, *J* = 8.7 Hz), 1.70-1.62 (1H, m), 1.50-1.42 (4H, m) ppm.

<sup>13</sup>C NMR (CDCl<sub>3</sub>) δ 147.0, 146.4 (dd, *J* = 2.5, 1.9 Hz), 129.4 (dd, *J* = 1.9, 0.6 Hz), 123.8, 113.6 (dd, *J* = 290.3, 286.6 Hz), 30.8 (dd, *J* = 11.5, 9.6 Hz), 22.8 (t, *J* = 9.9 Hz), 20.8 (dd, *J* = 6.2, 1.8 Hz) ppm.

<sup>19</sup>F NMR (CDCl<sub>3</sub>) δ -133.07 ~ -138.81 (1F, m), -138.24 ~ -138.81 (1F, m) ppm.

1,1-Difluoro-2,2-diphenylcyclopropane (**1q**) [51954-17-7]<sup>1</sup>

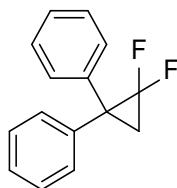

**Method A**, 2.53 g (11.01 mmol, 93%).

White solid.

R<sub>f</sub> = 0.43 (hexane:Et<sub>2</sub>O = 20:1).

<sup>1</sup>H NMR (CDCl<sub>3</sub>) δ 7.43-7.24 (10H, m), 2.08 (1H, t, *J* = 8.6 Hz) ppm.

<sup>13</sup>C NMR (CDCl<sub>3</sub>) δ 138.6, 128.8 (t, *J* = 1.2 Hz), 128.6, 127.3, 112.9 (t, *J* = 288.1 Hz), 40.0 (t, *J* = 10.6 Hz), 23.6 (t, *J* = 9.9 Hz) ppm.

<sup>19</sup>F NMR (CDCl<sub>3</sub>) δ -131.19 (t, *J* = 9.0 Hz) ppm.

(*E*)-[2-(2,2-Difluoro-1-methylcyclopropyl)ethen-1-yl]benzene (**1r**) [1323437-19-9]<sup>1</sup>

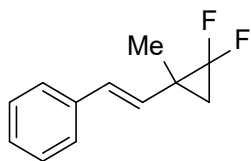

**Method B**, 1.18 g (6.08 mmol, 61%).

Colorless oil.

R<sub>f</sub> = 0.43 (hexane).

<sup>1</sup>H NMR (CDCl<sub>3</sub>) δ 7.36-7.21 (5H, m), 6.34 (1H, d, *J* = 16.2 Hz), 6.06 (1H, d, *J* = 16.2 Hz), 1.51-1.30 (m, 5H) ppm.

<sup>13</sup>C NMR (CDCl<sub>3</sub>) δ 136.8, 129.8, 128.6, 127.9 (dd, *J* = 6.3, 2.5 Hz), 127.4, 126.1, 115.9 (dd, *J* = 292.7, 288.4 Hz), 28.6 (dd, *J* = 11.8, 10.0 Hz), 24.1 (dd, *J* = 10.6, 8.7 Hz), 15.3 (dd, *J* = 6.2, 1.2 Hz) ppm.

<sup>19</sup>F NMR (CDCl<sub>3</sub>) δ -136.51 (1F, dd, *J* = 152.9, 13.6 Hz), -137.76 (1F, dd, *J* = 152.9, 11.3 Hz) ppm.

(2,2-Difluoro-3-methylcyclopropyl)-4-methoxybenzene (**1s**) [1809584-73-3]<sup>6</sup>

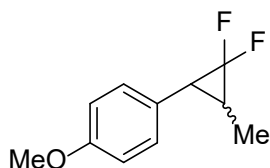

The data in literatures were all for the *trans* isomer. Although **1s** in this study was the *cis* and *trans* mixture, the NMR data could be divided into respective data based on reference data and ratio. So, they are listed separately. See also NMR spectra (page S62-63).

**Method B**, 0.93 g (4.73 mmol, 95%, *cis:trans* = 73:27).

Colorless oil.

R<sub>f</sub> = 0.32 (hexane:AcOEt = 20:1).

#### ***cis* isomer**

<sup>1</sup>H NMR (CDCl<sub>3</sub>) δ 7.18 (2H, d, *J* = 8.4 Hz), 6.84 (2H, d, *J* = 8.7 Hz), 3.79 (3H, s), 2.70 (1H, dd, *J* = 15.3, 12.0 Hz), 1.94-1.79 (1H, m), 0.94 – 0.91 (3H, m) ppm.

<sup>13</sup>C NMR (CDCl<sub>3</sub>) δ 158.6, 131.2 (t, *J* = 1.9 Hz), 123.6 (d, *J* = 1.2 Hz), 115.1 (dd, *J* = 288.4, 285.9 Hz), 113.8, 55.1, 27.8 (dd, *J* = 12.4, 9.3 Hz), 21.8 (t, *J* = 9.8 Hz), 6.7 (m) ppm.

<sup>19</sup>F NMR (CDCl<sub>3</sub>) δ -122.98 (1F, dm, *J* = 155.2 Hz), -150.76 (1F, d, *J* = 155.2 Hz) ppm.

***trans* isomer**

$^1\text{H}$  NMR ( $\text{CDCl}_3$ )  $\delta$  7.12 (2H, d,  $J = 8.7$  Hz), 6.84 (2H, d,  $J = 8.7$  Hz), 3.79 (3H, s), 2.23 (1H, ddd,  $J = 10.8, 7.5, 4.2$  Hz), 1.82-1.68 (1H, m), 1.34 – 1.31 (3H, m) ppm.

$^{13}\text{C}$  NMR ( $\text{CDCl}_3$ )  $\delta$  158.6, 128.9 (t,  $J = 1.5$  Hz), 126.2, 114.8 (t,  $J = 289.7$  Hz), 113.8, 55.2, 33.2 (t,  $J = 10.9$  Hz), 24.1 (t,  $J = 9.9$  Hz), 11.4 (d,  $J = 3.1$  Hz) ppm.

$^{19}\text{F}$  NMR ( $\text{CDCl}_3$ )  $\delta$  -138.74 ~ -139.92 (2F, m) ppm.

IR ( $\text{CHCl}_3$ )  $\nu$  3007, 2964, 2936, 2837, 1613, 1517, 1475, 1290, 1250, 1180  $\text{cm}^{-1}$ .

HRMS (FAB+,  $m/z$ ):  $[\text{M}+\text{H}]^+$  calcd for  $\text{C}_{11}\text{H}_{13}\text{F}_2\text{O}^+$ , 199.0929; found, 199.0957.

### Preparation of 2,2-difluoro-3-(4-methoxyphenyl)cycloprop-1-yl)methanol (1t)

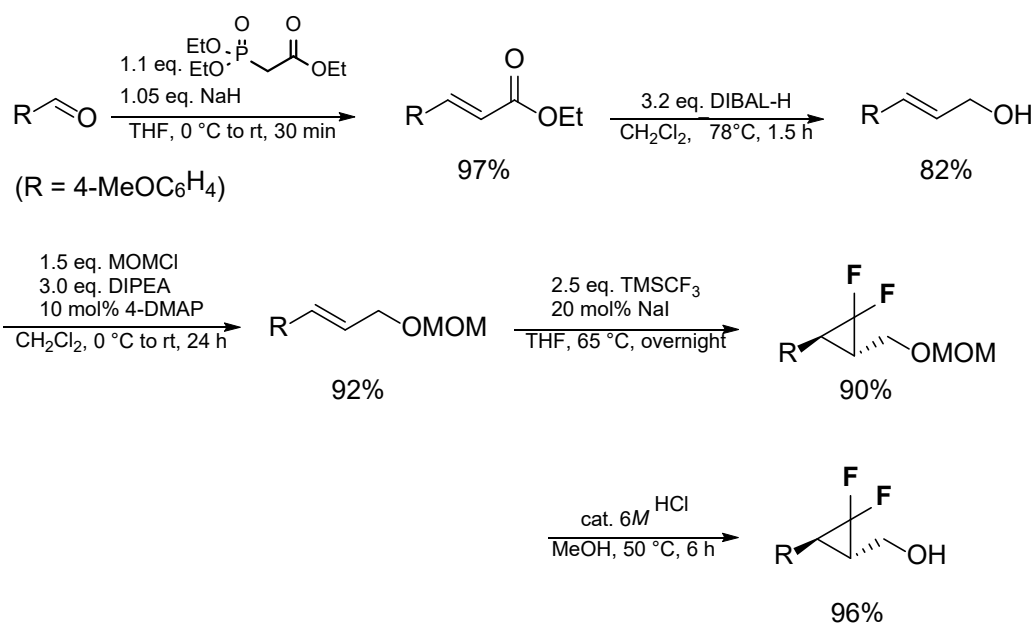

(*E*)-Ethyl 3-(4-methoxyphenyl)prop-1-enoate [24393-56-4]<sup>7</sup>

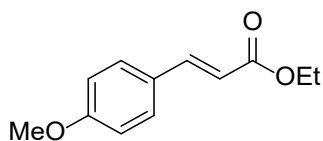

To a mixture of  $NaH$  (55% oil dispersion) 0.9165 g (21.0 mmol) in THF 25 mL was added ethyl diethylphosphonoacetate 4.40 mL (22.0 mmol) at  $0\text{ }^\circ\text{C}$  under argon atmosphere. After stirring at  $0\text{ }^\circ\text{C}$  for 20 min, the solution of 4-methoxybenzaldehyde 2.7232 g (20.0 mmol) in THF 16.7 mL was dropwisely into the mixture. The mixture was stirred at  $0\text{ }^\circ\text{C}$  to room temperature for 30 min. After quenching by brine (20 mL), the residue was evaporated to dryness under reduced pressure, which was extracted by  $CH_2Cl_2$  three times. After drying over anhydrous  $Na_2SO_4$  and concentration, the crude product was purified by silica gel column chromatography (hexane:AcOEt = 10:1) to obtain (*E*)-ethyl 3-(4-methoxyphenyl)prop-2-enoate 4.0173 g (19.48 mmol, 97%) as a white solid.

$^1H$  NMR ( $CDCl_3$ )  $\delta$  7.64 (1H, d,  $J = 15.9$  Hz), 7.47 (2H, d,  $J = 8.4$  Hz), 6.89 (2H, d,  $J = 8.4$  Hz), 6.30 (1H, d,  $J = 15.9$  Hz), 4.25 (2H, q,  $J = 6.9$  Hz), 3.82 (3H, s), 1.33 (3H, t,  $J = 6.9$  Hz) ppm.

$^{13}C$  NMR ( $CDCl_3$ )  $\delta$  167.2, 161.2, 144.2, 129.6, 127.1, 115.6, 114.2, 60.2, 55.3, 14.3 ppm.

(*E*)-3-(4-Methoxyphenyl)prop-2-en-1-ol [53484-50-7]<sup>8</sup>

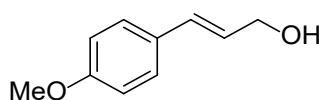

To a mixture of (*E*)-ethyl 2-(4-methoxyphenyl)prop-1-enoate 2.0624 g (10.0 mmol) in CH<sub>2</sub>Cl<sub>2</sub> 20 mL was dropwised DIBAL-H (1.04 M hexane solution) 21.2 mL (22.0 mmol) at -78 °C under argon atmosphere. After stirring at -78 °C for 1 h, the additional DIBAL-H (1.04 M hexane solution) 10.0 mL (10.0 mmol) was dropwised and the reaction mixture was stirred at -78 °C to room temperature for 1 h. After quenching by 10% NaOH aq. (20 mL) at -78 °C, the residue was warmed up to room temperature and stirred for 1 h, then the residue was extracted by CH<sub>2</sub>Cl<sub>2</sub> three times. After drying over anhydrous Na<sub>2</sub>SO<sub>4</sub> and concentration, a white solid was precipitated, which was filtered and washed by hexane to obtain (*E*)-3-(4-methoxyphenyl)prop-2-en-1-ol 3.1986 g (19.48 mmol, 97%).

<sup>1</sup>H NMR (CDCl<sub>3</sub>) δ 7.35-7.30 (2H, m), 6.88-6.84 (2H, m), 6.56 (1H, d, *J* = 15.9 Hz), 6.24 (1H, dt, *J* = 15.9, 6.0 Hz), 4.32-4.28 (2H, m), 3.81 (3H, s), 1.50 (1H, t, *J* = 5.4 Hz) ppm.

<sup>13</sup>C NMR (CDCl<sub>3</sub>) δ 159.3, 130.9, 129.3, 127.6, 126.2, 114.0, 63.9, 55.3 ppm.

(*E*)-1-Methoxy-4-(3-(methoxymethoxy)prop-1-en-1-yl)benzene [2268814-11-3]<sup>9</sup>

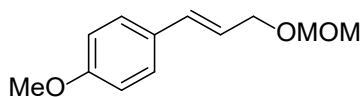

To a mixture of (*E*)-3-(4-methoxyphenyl)prop-2-en-1-ol 0.8211 g (5.0 mmol) in CH<sub>2</sub>Cl<sub>2</sub> 10 mL were added DIPEA 2.60 mL (15.0 mmol) and DMAP 0.0608 g (0.50 mmol) at room temperature. Chloromethyl methyl ether 0.60 mL (7.5 mmol) was dropwised to the mixture at 0 °C, which was stirred at 0 °C to room temperature for 24 h. After quenching by water (20 mL), the residue was extracted by Et<sub>2</sub>O three times. After drying over anhydrous Na<sub>2</sub>SO<sub>4</sub> and concentration, the crude product was purified by column chromatography (hexane:AcOEt = 4:1) to obtain (*E*)-1-methoxy-4-(3-(methoxymethoxy)prop-1-en-1-yl)benzene 0.9590 g (4.60 mmol, 92%) as a colorless oil.

<sup>1</sup>H NMR (CDCl<sub>3</sub>) δ 7.36-7.31 (2H, m), 6.88-6.83 (2H, m), 6.58 (1H, dd, *J* = 16.2, 1.2 Hz), 6.16 (1H, dt, *J* = 16.2, 6.3 Hz), 4.70 (2H, s), 3.81 (3H, s), 3.40 (3H, s) ppm.

<sup>13</sup>C NMR (CDCl<sub>3</sub>) δ 159.3, 132.4, 129.4, 127.7, 123.2, 113.9, 95.5, 68.0, 55.2 ppm.

*trans*-1-{2,2-Difluoro-3-[(methoxymethoxy)methyl]cycloprop-1-yl}-4-methoxybenzene (**pre-1t**)

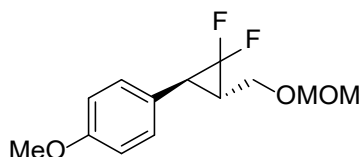

This compound was synthesized by **Method B** from (*E*)-1-methoxy-4-(3-(methoxymethoxy)prop-1-en-1-yl) benzene 0.8335 g (4.0 mmol).

**Method B:** 0.9250 g (3.58 mmol, 90%).

Yellow oil.

R<sub>f</sub> = 0.44 (hexane:AcOEt = 3:1).

<sup>1</sup>H NMR (CDCl<sub>3</sub>) δ 7.14 (2H, d, *J* = 8.7 Hz), 6.84 (2H, d, *J* = 8.7 Hz), 4.65 (2H, s), 3.79-3.60 (2H, m), 3.75 (3H, s), 3.36 (3H, s), 2.53 (1H, dd, *J* = 14.1, 7.5 Hz), 2.18-2.07 (1H, m) ppm.

<sup>13</sup>C NMR (CDCl<sub>3</sub>) δ 158.7, 129.0 (dd, *J* = 1.9, 1.2 Hz), 124.9, 113.8, 113.4 (dd, *J* = 289.0, 288.4 Hz), 96.0, 64.0 (d, *J* = 5.1 Hz), 55.0 (dd, *J* = 4.3, 1.2 Hz), 30.8 (t, *J* = 11.2 Hz), 28.8 (t, *J* = 9.9 Hz) ppm.

<sup>19</sup>F NMR (CDCl<sub>3</sub>) δ -137.06 (1F, dd, *J* = 155.2, 13.8 Hz), -138.54 (1F, dd, *J* = 155.2, 13.8 Hz) ppm.

IR (CHCl<sub>3</sub>) ν 3101, 2937, 2889, 2839, 1614, 1519, 1466, 1251, 1181, 1037 cm<sup>-1</sup>.

HRMS (FAB<sup>+</sup>, *m/z*): [M+H]<sup>+</sup> calcd for C<sub>13</sub>H<sub>17</sub>F<sub>2</sub>O<sub>3</sub><sup>+</sup>, 259.1140; found, 259.1158.

*trans*-[2,2-Difluoro-3-(4-methoxyphenyl)cyclopropyl]methanol (**1t**)

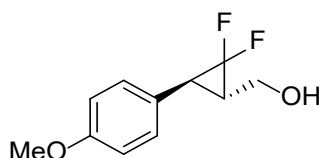

To a mixture of *trans*-1-(2,2-difluoro-3-((methoxymethoxy)methyl)cyclopropyl)-4-methoxybenzene in MeOH 6.0 mL was added 6 M HCl aq. (4 drops) at room temperature. After stirring at 50 °C for 6 h, the residue was evaporated to remove MeOH. Water 20 mL was added to the residue, which was extracted by Et<sub>2</sub>O two times. After drying over anhydrous Na<sub>2</sub>SO<sub>4</sub> and concentration, the crude product was purified by column chromatography (hexane:AcOEt = 2:1) to obtain *trans*-(2,2-difluoro-3-(4-methoxyphenyl)cyclopropyl)methanol 0.3779 g (1.77 mmol, 89%).

Pale yellow oil.

R<sub>f</sub> = 0.27 (hexane:AcOEt = 2:1).

<sup>1</sup>H NMR (CDCl<sub>3</sub>) δ 7.13 (2H, d, *J* = 8.7 Hz), 6.85 (2H, d, *J* = 8.7 Hz), 4.02-3.66 (2H, m), 3.75 (3H, s), 2.54 (1H, ddd, *J* = 10.8, 7.5, 3.6 Hz), 2.39 (1H, br s), 2.17-2.05 (1H, m) ppm.

<sup>13</sup>C NMR (CDCl<sub>3</sub>) δ 158.7, 129.1, 124.8, 113.9, 113.7 (t, *J* = 288.4 Hz), 59.6 (d, *J* = 3.7 Hz), 55.2, 31.0 (t, *J* = 9.6 Hz), 30.6 (t, *J* = 10.8 Hz) ppm.

<sup>19</sup>F NMR (CDCl<sub>3</sub>) δ -137.70 (1F, dd, *J* = 155.2, 8.8 Hz), -136.87 (1F, dd, *J* = 155.2, 11.6 Hz) ppm.

IR (CHCl<sub>3</sub>) ν 3369, 3007, 2938, 2838, 1614, 1519, 1465, 1250, 1614, 833 cm<sup>-1</sup>.

HRMS (FAB<sup>+</sup>, *m/z*): [M]<sup>+</sup> calcd for C<sub>11</sub>H<sub>12</sub>F<sub>2</sub>O<sub>2</sub><sup>+</sup>, 214.0800; found, 214.0804.

### General Procedure of Iodohydroxylation

2,2-Difluoro-3-iodo-1-(4-methoxyphenyl)propan-1-ol (**2a**) [2366981-43-1]<sup>5</sup>

A mixture of 0.0916 g (0.50 mmol) of 1-(2,2-difluorocycloprop-1-yl)-4-methoxybenzene, 0.254 g (1.00 mmol) of I<sub>2</sub> in 0.75 mL of MeCN and 0.75 mL of water in a pressure tight glass tube was stirred at 80 °C (oil bath temperature) for 18 h, and the reaction mixture was extracted with CH<sub>2</sub>Cl<sub>2</sub> three times. After dried over anhydrous Na<sub>2</sub>SO<sub>4</sub>, the crude product was evaporated and purified by silica gel column chromatography by hexane:AcOEt = 20:1-10:1 as an eluent to yield 0.149 g (0.453 mmol) of 2,2-difluoro-3-iodo-1-(4-methoxyphenyl)propan-1-ol as a colorless oil in 91% yield.

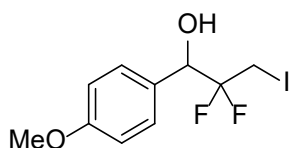

Colorless oil.

R<sub>f</sub> = 0.32 (hexane:CH<sub>2</sub>Cl<sub>2</sub> = 1:2).

<sup>1</sup>H NMR (CDCl<sub>3</sub>) δ 7.37 (2H, d, *J* = 8.4 Hz), 6.91 (2H, d, *J* = 9.0 Hz), 5.05 (1H, ddd, *J* = 9.9, 8.1, 3.6 Hz), 3.81 (3H, s), 3.56 (1H, ddd, *J* = 23.7, 12.0, 9.0 Hz), 3.28 (1H, ddd, *J* = 23.1, 12.0, 7.8 Hz), 2.64 (1H, s) ppm.

<sup>13</sup>C NMR (CDCl<sub>3</sub>) δ 160.1, 128.6, 127.8, 119.3 (dd, *J* = 253.7, 249.4 Hz), 73.4 (t, *J* = 27.9 Hz), 55.3, 1.4 (t, *J* = 28.5 Hz) ppm.

<sup>19</sup>F NMR (CDCl<sub>3</sub>) δ -104.56 (1F, ddt, *J* = 244.2, 22.9, 9.0 Hz), -106.53 (1F, ddt, *J* = 243.9, 22.8, 9.0 Hz) ppm.

1-(2,2-Difluoro-1,3-diiodoprop-1-yl)-4-methoxybenzene (**3a**) [2244675-09-8]<sup>10</sup>

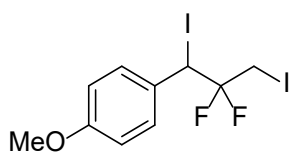

White solid.

m.p.: 81.5 - 82.9 °C.

R<sub>f</sub> = 0.21 (hexane:CH<sub>2</sub>Cl<sub>2</sub> = 4:1).

<sup>1</sup>H NMR (CDCl<sub>3</sub>) δ 7.46-7.41 (2H, m), 6.87-6.82 (2H, m), 5.55 (1H, dd, *J* = 20.6, 7.4 Hz), 3.80 (3H, s), 3.47 (1H, ddd, *J* = 16.5, 11.7, 8.7 Hz), 3.33 (1H, td, *J* = 15.6, 8.7 Hz) ppm.

<sup>13</sup>C NMR (CDCl<sub>3</sub>) δ 160.0, 130.3 (dd, *J* = 2.5, 1.3 Hz), 128.7 (d, *J* = 5.0 Hz), 118.0 (t, *J* = 246.9 Hz), 114.3, 55.3, 27.9 (dd, *J* = 27.8, 24.7 Hz), 0.6 (dd, *J* = 32.3, 31.1 Hz) ppm.

<sup>19</sup>F NMR (CDCl<sub>3</sub>) δ -87.33 ~ -88.32 (1F, m), -94.41 ~ -95.41 (1F, m) ppm.

(2,2-Difluoro-1,3-diiodoprop-1-yl)-3-methoxybenzene (**3b**)

It was difficult to isolate this compound from the substrate **1b**, so only NMR data was shown below.

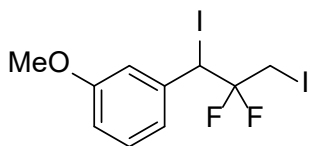

$^1\text{H}$  NMR ( $\text{CDCl}_3$ )  $\delta$  7.27-7.22 (1H, m), 7.09-7.05 (1H, m), 6.88-6.77 (2H, m), 5.51 (1H, dd,  $J = 20.4$ , 7.2 Hz), 3.73 (3H, s), 3.55-3.28 (2H, m) ppm.

$^{13}\text{C}$  NMR ( $\text{CDCl}_3$ )  $\delta$  159.7, 138.1 (d,  $J = 5.6$  Hz), 130.0, 129.4, 121.3, 117.9 (t,  $J = 246.9$  Hz), 114.8, 55.3, 27.4 (t,  $J = 25.4$  Hz) 0.4 (t,  $J = 30.4$  Hz) ppm.

$^{19}\text{F}$  NMR ( $\text{CDCl}_3$ )  $\delta$  -87.71 (1F, dm,  $J = 239.7$  Hz), -94.52 (1F, dm  $J = 239.4$  Hz) ppm.

2,2-Difluoro-3-iodo-1-(2-methoxyphenyl)propan-1-ol (**2c**)

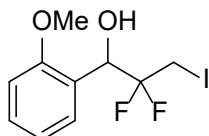

Instead of 1-(2,2-difluorocycloprop-1-yl)-4-methoxybenzene (**1a**), 0.0917 g (0.5 mmol) of 1-(2,2-difluorocycloprop-1-yl)-2-methoxybenzene (**1c**) was employed to afford 0.120 g of the title compound (0.366 mmol) in 73% yield.

White solid.

m.p.: 63.5 - 64.5 °C.

R<sub>f</sub> = 0.32 (hexane:AcOEt = 4:1).

$^1\text{H}$  NMR ( $\text{CDCl}_3$ )  $\delta$  7.40-7.32 (2H, m), 7.15 (1H, t,  $J = 6.8$  Hz), 6.94 (1H, d,  $J = 8.1$  Hz), 5.33 (1H, ddd,  $J = 12.8$ , 9.5, 7.1 Hz), 3.88 (3H, s), 3.65-3.49 (3H, m) ppm.

$^{13}\text{C}$  NMR ( $\text{CDCl}_3$ )  $\delta$  157.3, 130.1, 129.3, 123.6, 121.0, 119.4 (t,  $J = 247.1$  Hz), 111.2, 70.5 (t,  $J = 27.6$  Hz), 55.7, 2.4 (t,  $J = 28.5$  Hz) ppm.

$^{19}\text{F}$  NMR ( $\text{CDCl}_3$ )  $\delta$  -105.24 ~ -106.24 (1F, m), -106.56 ~ -107.57 (1F, m) ppm.

IR (KBr)  $\nu$  3449, 3012, 2941, 2841, 1603, 1494, 1465, 1248, 1011, 757  $\text{cm}^{-1}$ .

HRMS (FAB<sup>+</sup>, m/z):  $[\text{M}]^+$  calcd for  $\text{C}_{10}\text{H}_{11}\text{F}_2\text{IO}_2^+$ , 327.9766; found: 327.9764.

2,2-Difluoro-3-iodo-1-(3,4,5-trimethoxyphenyl)propan-1-ol (**2d**)

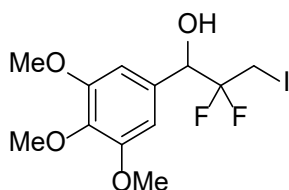



Instead of 1-(2,2-difluorocycloprop-1-yl)-4-methoxybenzene (**1a**), 0.122 g (0.5 mmol) of 1-(2,2-difluorocycloprop-1-yl)-3,4,5-trimethoxybenzene (**1d**) was employed to afford 0.157 g of the title compound (0.404 mmol) in 81% yield.

White solid.

m.p.: 121.0 - 123.0 °C.

R<sub>f</sub> = 0.20 (hexane:AcOEt = 4:1).

<sup>1</sup>H NMR (CDCl<sub>3</sub>) δ 6.67 (2H, s), 5.06 (1H, td, *J* = 9.5, 3.9 Hz), 3.87 (6H, s), 3.85 (3H, s), 3.52 (1H, ddd, *J* = 23.1, 12.0, 9.6 Hz), 3.30 (1H, ddd, *J* = 22.7, 11.9, 8.4 Hz), 2.70 (1H, br s) ppm.

<sup>13</sup>C NMR (CDCl<sub>3</sub>) δ 153.2, 138.2, 131.4, 119.2 (dd, *J* = 248.7, 245.0 Hz), 104.2, 73.7 (t, *J* = 28.5 Hz), 60.8, 56.1, 1.3 (dd, *J* = 29.4, 27.6 Hz) ppm.

<sup>19</sup>F NMR (CDCl<sub>3</sub>) δ -103.58 ~ -104.52 (1F, m), -105.61 ~ -106.59 (1F, m) ppm.

IR (KBr) ν 3610, 3423, 3019, 1595, 1464, 1421, 1216, 1131, 761, 670 cm<sup>-1</sup>.

HRMS (FAB<sup>+</sup>, *m/z*): [M]<sup>+</sup> calcd for C<sub>12</sub>H<sub>15</sub>F<sub>2</sub>IO<sub>4</sub><sup>+</sup>, 387.9978; found, 387.9986.

#### 2,2-Difluoro-3-iodo-1-(4-hydroxyphenyl)propan-1-ol (**2e**)

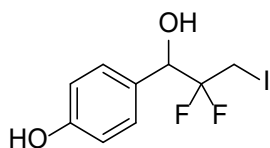

Instead of 1-(2,2-difluorocycloprop-1-yl)-4-methoxybenzene (**1a**), 0.0851 g (0.5 mmol) of 4-(2,2-difluorocycloprop-1-yl)phenol (**1e**) was employed to afford 0.131 g of the title compound (0.416 mmol) in 83% yield.

White solid.

m.p.: 118.0 - 121.0 °C.

R<sub>f</sub> = 0.24 (hexane:AcOEt = 2:1).

<sup>1</sup>H NMR (acetone-*d*<sub>6</sub>) δ 8.28 (1H, s), 7.18 (2H, d, *J* = 8.4 Hz), 6.72 (2H, d, *J* = 8.4 Hz), 5.20 (1H, d, *J* = 5.1 Hz), 4.89 (1H, ddd, *J* = 12.8, 7.7, 5.0 Hz), 3.68-3.35 (2H, m) ppm.

<sup>13</sup>C NMR (acetone-*d*<sub>6</sub>) δ 158.3, 129.7, 129.2, 120.4 (dd, *J* = 245.9, 244.0 Hz), 115.6, 73.5 (dd, *J* = 29.1, 27.3 Hz), 3.2 (t, *J* = 28.2 Hz) ppm.

<sup>19</sup>F NMR (acetone-*d*<sub>6</sub>) δ -103.43 (1F, ddd, *J* = 241.7, 27.3, 7.9 Hz), -107.66 (1F, ddd, *J* = 240.5, 26.1, 12.4 Hz) ppm.

IR (KBr) ν 3257, 3027, 1905, 1685, 1612, 1516, 1444, 1180, 1000, 820 cm<sup>-1</sup>.

HRMS (FAB<sup>+</sup>, *m/z*): [M]<sup>+</sup> calcd for C<sub>9</sub>H<sub>9</sub>F<sub>2</sub>IO<sub>2</sub><sup>+</sup>, 313.9610; found, 313.9635.

1-(4-*tert*-Butylphenyl)-2,2-difluoro-3-iodopropan-1-ol (**2f**) [2366981-46-4]<sup>5</sup>

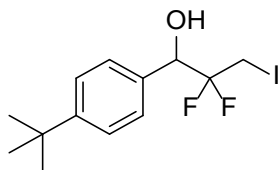

Instead of 1-(2,2-difluorocycloprop-1-yl)-4-methoxybenzene (**1a**), 0.105 g (0.5 mmol) of 1-(*tert*-butyl)-4-(2,2-difluorocycloprop-1-yl)benzene (**1f**) was employed to afford 0.080 g of the title compound (0.225 mmol) in 45% yield.

White solid.

m.p.: 83.0 - 84.0 °C.

R<sub>f</sub> = 0.46 (hexane:AcOEt = 4:1).

<sup>1</sup>H NMR (CDCl<sub>3</sub>) δ 7.42 – 7.35 (4H, m), 5.09 (1H, td, *J* = 9.0, 3.9 Hz), 3.59 (1H, ddd, *J* = 24.0, 11.7, 8.4 Hz), 3.29 (1H, ddd, *J* = 23.6, 11.7, 7.5 Hz), 2.46 (1H, br d, *J* = 4.2 Hz), 1.32 (9H, s) ppm.

<sup>13</sup>C NMR (CDCl<sub>3</sub>) δ 152.2, 132.7 (d, *J* = 1.9 Hz), 126.9, 125.5, 119.3 (t, *J* = 246.3 Hz), 73.6 (t, *J* = 28.5 Hz), 34.6, 31.2, 1.44 (t, *J* = 28.6 Hz) ppm.

<sup>19</sup>F NMR (CDCl<sub>3</sub>) δ -104.20 (1F, ddt, *J* = 244.2, 18.4, 9.0 Hz), -106.25 (1F, ddt, *J* = 243.9, 18.4, 9.0 Hz) ppm.

2,2-Difluoro-3-iodo-1-phenylpropan-1-ol (**2g**)

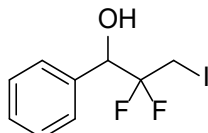

Instead of 1-(2,2-difluorocycloprop-1-yl)-4-methoxybenzene (**1a**), 0.0855 g (0.5 mmol, Purity 90 wt% in THF) of 2,2-difluorocycloprop-1-ylbenzene (**1g**) was employed to afford 0.057 g of the title compound (0.193 mmol) in 39% yield with the corresponding iodide in 22% and ketone 6% in <sup>19</sup>F NMR yield.

White solid.

m.p.: 56.2 - 57.0 °C.

R<sub>f</sub> = 0.32 (hexane:AcOEt = 4:1).

<sup>1</sup>H NMR (CDCl<sub>3</sub>) δ 7.46-7.38 (5H, m), 5.10 (1H, t, *J* = 9.3 Hz), 3.59 (1H, ddd, *J* = 24.3, 12.0, 8.9 Hz), 3.27 (1H, ddd, *J* = 23.7, 12.0, 7.2 Hz), 2.61 (1H, s) ppm.

<sup>13</sup>C NMR (CDCl<sub>3</sub>) δ 135.6, 129.1, 128.5, 127.2, 119.2 (t, *J* = 246.5 Hz), 73.7 (t, *J* = 28.5 Hz), 1.2 (t, *J* = 28.6 Hz) ppm.

<sup>19</sup>F NMR (CDCl<sub>3</sub>) δ -104.08 (1F, ddt, *J* = 244.1, 22.8, 9.2 Hz), -106.35 (1F, dddd, *J* = 246.3, 25.2,

11.4, 6.8 Hz) ppm.

IR (KBr)  $\nu$  3585, 3430, 3035, 1455, 1417, 1216, 1059, 1013, 757, 705  $\text{cm}^{-1}$ .

HRMS (FAB<sup>+</sup>,  $m/z$ ):  $[M]^+$  calcd for  $\text{C}_9\text{H}_9\text{F}_2\text{IO}^+$ , 297.9661, found, 297.9679.

(2,2-Difluoro-1,3-diiodoprop-1-yl)benzene (**3g**)

Data for the crude product were included, because it was difficult to isolate from the byproduct.

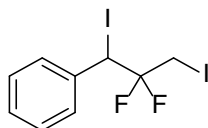

22% in  $^{19}\text{F}$  NMR yield.

R<sub>f</sub> = 0.56 (hexane:AcOEt = 4:1).

$^1\text{H}$  NMR ( $\text{CDCl}_3$ )  $\delta$  7.57-7.501 (2H, m), 7.39-7.31 (3H, m), 5.55 (1H, dd,  $J$  = 20.1, 7.5 Hz), 3.55-3.26 (2H, m) ppm.

$^{13}\text{C}$  NMR ( $\text{CDCl}_3$ )  $\delta$  136.7 (d,  $J$  = 5.0 Hz), 130.2 (t,  $J$  = 3.1 Hz), 129.3, 129.1, 129.0, 118.0 (t,  $J$  = 246.9 Hz), 27.6 (dd,  $J$  = 27.9, 25.4 Hz), 0.5 (dd,  $J$  = 32.3, 31.0 Hz) ppm.

$^{19}\text{F}$  NMR ( $\text{CDCl}_3$ )  $\delta$  -87.66 ~ -88.64 (1F, m), -94.25 ~ -95.25 (1F, m) ppm.

HRMS (FAB<sup>+</sup>,  $m/z$ ):  $[M]^+$  calcd for  $\text{C}_9\text{H}_8\text{F}_2\text{I}_2^+$ , 407.8678, found, 407.8680.

1-(4-Bromophenyl)-2,2-difluoro-3-iodopropan-1-ol (**2h**)

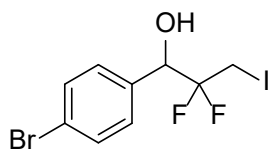

Instead of 1-(2,2-difluorocycloprop-1-yl)-4-methoxybenzene (**1a**), 0.0937 g (0.25 mmol) of 1-bromo-4-(2,2-difluorocycloprop-1-yl)benzene (**1h**) and instead of MeCN, DMSO as solvent were employed to afford 0.0492 g of the title compound (0.130 mmol) in 52% yield.

White solid.

m.p.: 88.5 - 89.4  $^\circ\text{C}$ .

R<sub>f</sub> = 0.41 (hexane:AcOEt = 4:1).

$^1\text{H}$  NMR ( $\text{CDCl}_3$ )  $\delta$  7.55-7.52 (2H, m), 7.36-7.33 (2H, m), 5.11 (1H, ddd,  $J$  = 11.7, 7.8, 4.2 Hz), 3.59 (1H, ddd,  $J$  = 23.4, 11.7, 9.6 Hz), 3.25 (1H, ddd,  $J$  = 23.0, 11.7, 7.2 Hz), 2.56 (1H, br m) ppm.

$^{13}\text{C}$  NMR ( $\text{CDCl}_3$ )  $\delta$  134.7, 131.7, 128.9, 123.3, 119.0 (t,  $J$  = 247.2 Hz), 73.1 (t,  $J$  = 28.5 Hz), 0.7 (t,  $J$  = 29.1 Hz) ppm.

$^{19}\text{F}$  NMR ( $\text{CDCl}_3$ )  $\delta$  -103.71 (1F, dm,  $J$  = 246.5 Hz), -106.58 (1F, dm,  $J$  = 246.5 Hz) ppm.

IR (KBr)  $\nu$  3595, 3048, 2909, 1912, 1593, 1486, 1186, 999, 793, 583  $\text{cm}^{-1}$ .

HRMS (FAB<sup>+</sup>, m/z): [M]<sup>+</sup> calcd for C<sub>9</sub>H<sub>8</sub>BrF<sub>2</sub>IO<sup>+</sup>, 375.8766; found, 375.8778.

3,3-Difluoro-4-iodo-2-(4-methoxyphenyl)butan-2-ol (**2j**) [2366981-41-9]<sup>5</sup>

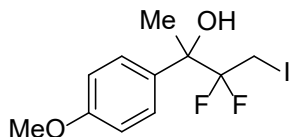

Instead of 1-(2,2-difluorocycloprop-1-yl)-4-methoxybenzene (**1a**), 0.0989 g (0.5 mmol) of 1-(2,2-difluoro-1-methylcycloprop-2-yl)-4-methoxybenzene (**1j**) was employed to afford 0.139 g of the title compound (0.407 mmol) in 81% yield.

White solid.

m.p.: 63.5 - 64.0 °C.

R<sub>f</sub> = 0.20 (hexane:CH<sub>2</sub>Cl<sub>2</sub> = 1:1).

<sup>1</sup>H NMR (CDCl<sub>3</sub>) δ 7.48–7.42 (2H, m), 6.92–6.87 (2H, m), 3.81 (3H, s), 3.65 (1H, ddd, *J* = 32.7, 12.0, 2.4 Hz), 3.03 (1H, ddd, *J* = 31.2, 12.0, 3.2 Hz), 2.34 (1H, s), 1.74 (3H, dd, *J* = 1.5, 1.2 Hz) ppm.

<sup>13</sup>C NMR (CDCl<sub>3</sub>) δ 159.3, 132.2 (dd, *J* = 3.7, 1.2 Hz), 127.0 (dd, *J* = 2.5, 1.3 Hz), 120.2 (t, *J* = 250.3 Hz), 113.6, 75.0 (dd, *J* = 27.9, 26.7 Hz), 55.2, 24.3 (t, *J* = 2.5 Hz), 2.9 (t, *J* = 28.5 Hz) ppm.

<sup>19</sup>F NMR (CDCl<sub>3</sub>) δ -105.97 (1F, dd, *J* = 239.4, 31.9 Hz), -108.35 (1F, dd, *J* = 239.4, 31.7 Hz) ppm.

3,3-Difluoro-4-iodo-2-(3-methoxyphenyl)butan-2-ol (**2k**)

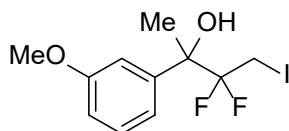

Instead of 1-(2,2-difluorocycloprop-1-yl)-4-methoxybenzene (**1a**), 0.0929 g (0.47 mmol) of 1-(2,2-difluoro-1-methylcycloprop-1-yl)-3-methoxybenzene (**1k**) was employed to afford 0.119 g of the title compound (0.348 mmol) in 74% yield.

Colorless oil.

R<sub>f</sub> = 0.46 (hexane:AcOEt = 4:1).

<sup>1</sup>H NMR (CDCl<sub>3</sub>) δ 7.31 (1H, d, *J* = 7.5 Hz), 7.12-7.09 (2H, m), 6.89-6.86 (1H, m), 3.83 (3H, s), 3.66 (1H, ddd, *J* = 32.7, 12.3, 2.1 Hz), 3.02 (1H, ddd, *J* = 31.5, 12.3, 3.3 Hz), 2.26 (1H, d, *J* = 0.9 Hz), 1.76 (3H, s) ppm.

<sup>13</sup>C NMR (CDCl<sub>3</sub>) δ 159.5, 141.8 (d, *J* = 4.4 Hz), 129.5, 120.0 (dd, *J* = 251.8, 250.0 Hz), 118.1 (d, *J* = 1.8 Hz), 113.1, 111.9, 75.2 (dd, *J* = 27.3, 26.1 Hz), 55.2, 24.3, 2.8 (d, *J* = 27.9 Hz) ppm.

<sup>19</sup>F NMR (CDCl<sub>3</sub>) δ -105.72 (1F, dd, *J* = 241.9, 31.9 Hz), -108.20 (1F, dd, *J* = 241.9, 30.7 Hz) ppm.

IR (CHCl<sub>3</sub>) ν 3470, 3003, 2837, 1584, 1489, 1435, 1249, 1011, 757, 704 cm<sup>-1</sup>.

HRMS (FAB<sup>+</sup>, m/z): [M+H]<sup>+</sup> calcd for C<sub>11</sub>H<sub>14</sub>F<sub>2</sub>O<sub>2</sub>I<sup>+</sup>, 343.0001; found, 343.0010.

3,3-Difluoro-4-iodo-2-(2-methoxyphenyl)butan-2-ol (**2l**) [2366981-49-7]<sup>5</sup>

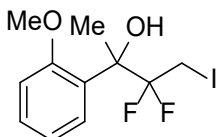

Instead of 1-(2,2-difluorocycloprop-1-yl)-4-methoxybenzene (**1a**), 0.0991 g (0.5 mmol) of 1-(2,2-difluoro-1-methylcycloprop-2-yl)-2-methoxybenzene (**1l**) was employed to afford 0.132 g of the title compound (0.384 mmol) in 77% yield.

White solid.

m.p.: 60.5 - 61.0 °C.

R<sub>f</sub> = 0.46 (hexane:AcOEt = 4:1).

<sup>1</sup>H NMR (CDCl<sub>3</sub>) δ 7.36–7.28 (2H, m), 7.04–6.96 (2H, m), 3.93 (3H, s), 3.78–3.57 (2H, m), 1.73 (3H, s) ppm.

<sup>13</sup>C NMR (CDCl<sub>3</sub>) δ 157.7, 129.8, 129.7, 127.3, 121.5, 120.4 (t, *J* = 251.9 Hz), 112.4, 77.2 (t, *J* = 26.0 Hz), 56.2, 23.9, 3.1 (t, *J* = 28.6 Hz) ppm.

<sup>19</sup>F NMR: δ -104.87 (1F, dm, *J* = 239.4 Hz), -106.14 (1F, dm, *J* = 239.4 Hz) ppm.

3,3-Difluoro-4-iodo-2-(3,4,5-trimethoxyphenyl)butan-2-ol (**2m**)

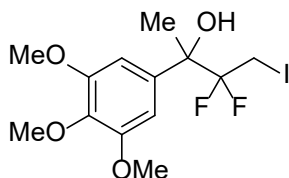

Instead of 1-(2,2-difluorocycloprop-1-yl)-4-methoxybenzene (**1a**), 0.1290 g (0.5 mmol) of 1-(2,2-difluoro-1-methylcycloprop-2-yl)-3,4,5-methoxybenzene (**1m**) was employed to afford 0.143 g of the title compound (0.356 mmol) in 71% yield.

White solid.

m.p.: 192.0 - 193.4 °C.

R<sub>f</sub> = 0.24 (hexane:AcOEt = 4:1).

<sup>1</sup>H NMR (CDCl<sub>3</sub>) δ 6.76 (2H, d, *J* = 1.5 Hz), 3.88 (6H, s), 3.86 (3H, s), 3.66 (1H, ddd, *J* = 32.4, 12.4, 2.4 Hz), 3.04 (1H, ddd, *J* = 30.6, 12.0, 3.3 Hz), 2.29 (1H, br s), 1.76 (3H, s) ppm.

<sup>13</sup>C NMR (acetone-*d*<sub>6</sub>) δ 153.6, 138.5 (d, *J* = 3.2 Hz), 138.4, 121.3 (t, *J* = 250.6 Hz), 104.8, 75.2 (t, *J* = 26.7 Hz), 60.3, 56.3, 23.9, 4.4 (t, *J* = 27.9 Hz) ppm.

<sup>19</sup>F NMR (CDCl<sub>3</sub>) δ -105.58 (1F, dd, *J* = 239.4, 31.9 Hz), -107.87 (1F, dd, *J* = 241.7, 31.9 Hz) ppm.

IR (KBr)  $\nu$  3437, 2998, 2944, 2840, 1596, 1454, 1419, 1248, 1133, 1007  $\text{cm}^{-1}$ .

HRMS (FAB<sup>+</sup>,  $m/z$ ):  $[M]^+$  calcd for  $\text{C}_{13}\text{H}_{17}\text{F}_2\text{O}_4\text{I}^+$ , 402.0134; found, 402.0118.

### 3,3-Difluoro-4-iodo-2-phenylbutan-2-ol (**2n**)

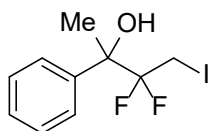

Instead of 0.5 mmol of 1-(2,2-difluorocycloprop-1-yl)-4-methoxybenzene (**1a**), 0.0843 g (0.5 mmol) of (2,2-difluoro-1-methylcycloprop-1-yl)benzene (**1n**) was employed to afford 0.127 g of the title compound (0.407 mmol) in 81% yield.

Colorless oil.

R<sub>f</sub> = 0.49 (hexane:AcOEt = 4:1).

<sup>1</sup>H NMR (CDCl<sub>3</sub>)  $\delta$  7.56-7.53 (2H, m), 7.41-7.26 (3H, m), 3.66 (1H, ddd,  $J$  = 32.7, 12.3, 2.7 Hz), 3.01 (1H, ddd,  $J$  = 31.1, 12.3, 3.3 Hz), 2.31 (1H, s), 1.78 (3H, s) ppm.

<sup>13</sup>C NMR (CDCl<sub>3</sub>)  $\delta$  140.2 (d,  $J$  = 3.7 Hz), 128.4, 128.1, 125.7, 120.1 (dd,  $J$  = 250.9, 249.7 Hz), 75.3 (dd,  $J$  = 27.6, 26.4 Hz), 24.4, 2.6 (t,  $J$  = 27.9 Hz) ppm.

<sup>19</sup>F NMR (CDCl<sub>3</sub>)  $\delta$  -105.84 (1F, dd,  $J$  = 241.7, 31.9 Hz), -108.24 (1F, dd,  $J$  = 241.7, 31.9 Hz) ppm.

IR (CHCl<sub>3</sub>)  $\nu$  3470, 2984, 2926, 1711, 1448, 1193, 1029, 1011, 763, 702  $\text{cm}^{-1}$ .

HRMS (FAB<sup>+</sup>,  $m/z$ ):  $[M]^+$  calcd for  $\text{C}_{10}\text{H}_{11}\text{F}_2\text{IO}^+$ , 311.9817; found, 311.9847.

### 2-(4-Bromophenyl)-3,3-difluoro-4-iodobutan-2-ol (**2o**)

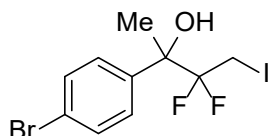

Data for **2o**: 0.120 g (0.384 mmol, 77% isolated yield).

Instead of 0.5 mmol of 1-(2,2-difluorocycloprop-1-yl)-4-methoxybenzene (**1a**), 0.0988 g (0.4 mmol) of 1-bromo-4-(2,2-difluorocycloprop-1-yl)benzene (**1o**) was employed to afford 0.120 g of the title compound (0.301 mmol) in 75% yield.

Colorless oil.

R<sub>f</sub> = 0.49 (hexane:AcOEt = 4:1).

<sup>1</sup>H NMR (CDCl<sub>3</sub>)  $\delta$  7.51 (2H, d,  $J$  = 8.6 Hz), 7.42 (2H, d,  $J$  = 8.6 Hz), 3.64 (1H, ddd,  $J$  = 32.7, 12.0, 2.1 Hz), 2.97 (1H, ddd,  $J$  = 31.2, 12.3, 3.3 Hz), 2.31 (1H, s), 1.75 (3H, s) ppm.

<sup>13</sup>C NMR (CDCl<sub>3</sub>)  $\delta$  139.2 (d,  $J$  = 3.1 Hz), 134.5, 127.6 (d,  $J$  = 1.3 Hz), 122.5, 119.8 (t,  $J$  = 249.4 Hz), 75.1 (t,  $J$  = 27.9 Hz), 23.2 (t,  $J$  = 2.5 Hz), 2.2 (t,  $J$  = 27.9 Hz) ppm.

$^{19}\text{F}$  NMR ( $\text{CDCl}_3$ )  $\delta$  -105.76 (1F, dd,  $J = 241.7, 31.9$  Hz), -108.28 (1F, dd,  $J = 241.7, 31.9$  Hz) ppm.

IR ( $\text{CHCl}_3$ )  $\nu$  3581, 2984, 1488, 1398, 1209, 1101, 1010, 926, 813, 460  $\text{cm}^{-1}$ .

HRMS (FAB $^+$ ,  $m/z$ ):  $[\text{M}]^+$  calcd for  $\text{C}_{10}\text{H}_{10}^{79}\text{BrF}_2\text{OI}^+$ , 389.8922; found, 389.8901.

### 3,3-Difluoro-4-iodo-2-(4-nitrophenyl)butan-2-ol (**2p**)

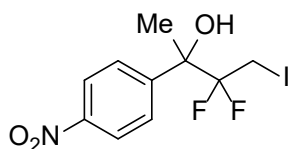

Instead of 0.5 mmol of 1-(2,2-difluorocycloprop-1-yl)-4-methoxybenzene (**1a**), 0.0847 g (0.4 mmol) of 1-(2,2-difluorocycloprop-1-yl)-4-nitrobenzene (**1p**) was employed to afford 0.064 g of the title compound (0.180 mmol) in 45% yield.

White solid.

m.p.: 100.3 - 101.3  $^{\circ}\text{C}$ .

R<sub>f</sub> = 0.33 (hexane:AcOEt = 4:1).

$^1\text{H}$  NMR ( $\text{CDCl}_3$ )  $\delta$  8.27-8.22 (2H, m), 7.80-7.75 (2H, m), 3.67 (1H, ddd,  $J = 32.4, 12.3, 2.4$  Hz), 2.95 (1H, ddd,  $J = 30.9, 12.0, 3.2$  Hz), 2.46 (1H, s), 1.82 (3H, s) ppm.

$^{13}\text{C}$  NMR ( $\text{CDCl}_3$ )  $\delta$  147.6, 147.3 (d,  $J = 3.7$  Hz), 127.1 (d,  $J = 1.9$  Hz), 123.5, 119.6 (dd,  $J = 251.2, 250.0$  Hz), 75.3 (t,  $J = 27.8$  Hz), 24.4 (t,  $J = 2.5$  Hz), 1.4 (t,  $J = 27.9$  Hz) ppm.

$^{19}\text{F}$  NMR ( $\text{CDCl}_3$ )  $\delta$  -105.14 (1F, dd,  $J = 244.2, 31.9$  Hz), -107.78 (1F, dd,  $J = 243.9, 29.6$  Hz) ppm.

IR (KBr)  $\nu$  3496, 3048, 2991, 1602, 1521, 1352, 1030, 1013, 857, 702  $\text{cm}^{-1}$ .

HRMS (FAB $^-$ ,  $m/z$ ):  $[\text{M}]^-$  calcd for  $\text{C}_{10}\text{H}_{10}\text{F}_2\text{NO}_3\text{I}^-$ , 356.9679; found, 356.9675.

### 2,2-Difluoro-3-iodo-1,1-diphenylpropan-1-ol (**2q**)

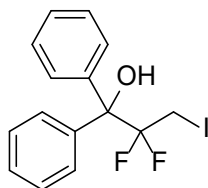

Instead of 0.5 mmol of 1-(2,2-difluorocycloprop-1-yl)-4-methoxybenzene (**1a**), 0.0922 g (0.4 mmol) of 1,1-difluoro-2,2-diphenylcyclopropane (**1q**) was employed to afford 0.121 g of the title compound (0.349 mmol) in 81% yield.

Colorless oil.

R<sub>f</sub> = 0.50 (hexane:AcOEt = 4:1).

$^1\text{H}$  NMR ( $\text{CDCl}_3$ )  $\delta$  7.55-7.52 (4H, m), 7.37-7.30 (6H, m), 3.51 (2H, t,  $J = 17.3$  Hz) ppm.

$^{19}\text{F}$  NMR ( $\text{CDCl}_3$ )  $\delta$  -102.18 (t,  $J = 17.1$  Hz) ppm.

$^{13}\text{C}$  NMR ( $\text{CDCl}_3$ )  $\delta$  141.0, 128.22, 128.16, 127.3, 121.2 (t,  $J = 253.7$  Hz), 78.9 (t,  $J = 25.7$  Hz), 4.2 (t,  $J = 27.6$  Hz) ppm.

IR ( $\text{CHCl}_3$ )  $\nu$  3584, 3061, 3012, 1494, 1449, 1342, 1216, 1019, 900, 757  $\text{cm}^{-1}$ .

HRMS (FAB $^+$ ,  $m/z$ ):  $[\text{M}+\text{Na}]^+$  calcd for  $\text{C}_{15}\text{H}_{13}\text{F}_2\text{IONa}^+$ , 396.9871; found, 396.9854.

(*E*)-4,4-Difluoro-5-iodo-3-methyl-1-phenylpent-1-en-3-ol (**2r**)

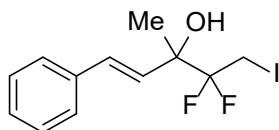

Instead of 0.5 mmol of 1-(2,2-difluorocycloprop-1-yl)-4-methoxybenzene (**1a**), 0.0966 g (0.5 mmol) of (*E*)-(2-(2,2-difluoro-1-methylcyclopropyl)ethen-1-yl)benzene (**1r**) was employed to afford 0.127 g of the title compound (0.374 mmol) in 75% yield.

Colorless oil.

$R_f = 0.52$  (hexane:AcOEt = 4:1).

$^1\text{H}$  NMR ( $\text{CDCl}_3$ )  $\delta$  7.43-7.28 (5H, m), 6.84 (1H, d,  $J = 15.9$  Hz), 6.26 (1H, dd,  $J = 15.9, 1.7$  Hz), 3.73 (1H, ddd,  $J = 31.7, 12.3, 2.9$  Hz), 3.54 (1H, ddd,  $J = 31.2, 12.3, 3.2$  Hz), 2.10 (1H, s), 1.57 (3H, s) ppm.

$^{13}\text{C}$  NMR ( $\text{CDCl}_3$ )  $\delta$  135.7, 131.0, 128.6, 128.2, 128.0 (d,  $J = 3.7$  Hz), 126.6, 121.4 (dd,  $J = 251.2, 249.3$  Hz), 74.6 (t,  $J = 27.6$  Hz), 23.0 (dd,  $J = 2.5, 1.9$  Hz), 2.5 (t,  $J = 27.9$  Hz) ppm.

$^{19}\text{F}$  NMR ( $\text{CDCl}_3$ )  $\delta$  -106.15 (1F, dd,  $J = 241.7, 31.9$  Hz), -109.65 (1F, dd,  $J = 240.8, 30.8$  Hz) ppm.

IR ( $\text{CHCl}_3$ )  $\nu$  3564, 3458, 3029, 2986, 1417, 1205, 1028, 1011, 749, 693  $\text{cm}^{-1}$ .

HRMS (FAB $^+$ ,  $m/z$ ):  $[\text{M}]^+$  calcd for  $\text{C}_{12}\text{H}_{13}\text{F}_2\text{IO}^+$ , 337.9974; found, 337.9983.

2,2-Difluoro-3-iodo-1-(4-methoxyphenyl)butan-1-ol (**2s**)

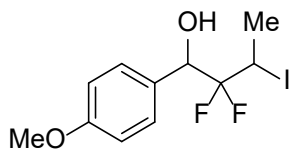

Instead of 0.5 mmol of 1-(2,2-difluorocycloprop-1-yl)-4-methoxybenzene (**1a**), 0.0933 g (0.5 mmol) of 1-(2,2-difluoro-3-methylcycloprop-1-yl)-4-methoxybenzene (**1s**, *cis:trans* = 77:23) was employed to afford 0.121 g of the title compound (0.385 mmol, *d.r.*=60:40) in 77% yield.

**major**

(1*R*\*,3*S*\*)-2,2-Difluoro-3-iodo-1-(4-methoxyphenyl)butan-1-ol (major-**2s**, 60:40)

White solid.

m.p.: 94.2 - 95.0  $^{\circ}\text{C}$ .



Rf = 0.35 (hexane:AcOEt = 4:1).

$^1\text{H}$  NMR ( $\text{CDCl}_3$ )  $\delta$  7.43 (2H, d,  $J = 8.7$  Hz), 6.91 (2H, d,  $J = 8.7$  Hz), 5.25 (1H, td,  $J = 15.0, 3.8$  Hz), 4.12 (1H, tq,  $J = 14.1, 7.2$  Hz), 3.82 (3H, s), 2.40 (1H, br s), 2.00 (3H, d,  $J = 7.2$  Hz) ppm.

$^{13}\text{C}$  NMR ( $\text{CDCl}_3$ )  $\delta$  160.1, 129.0, 127.9 (d,  $J = 3.1$  Hz), 120.2 (dd,  $J = 250.3, 248.4$  Hz), 113.9, 73.0 (dd,  $J = 28.2, 25.7$  Hz), 55.3, 21.6 (d,  $J = 3.8$  Hz), 21.5 (dd,  $J = 29.1, 24.8$  Hz) ppm.

$^{19}\text{F}$  NMR ( $\text{CDCl}_3$ )  $\delta$  -109.45 (1F, dm,  $J = 244.2$  Hz), -117.44 (1F, dm,  $J = 244.2$  Hz) ppm.

IR (KBr)  $\nu$  3495, 2940, 2844, 2017, 1899, 1609, 1510, 1010, 796, 577  $\text{cm}^{-1}$ .

HRMS (FAB<sup>+</sup>,  $m/z$ ):  $[\text{M}]^+$  calcd for  $\text{C}_{11}\text{H}_{13}\text{F}_2\text{IO}_2^+$ , 341.9923; found, 341.9916.

### **minor**

(1*R*\*,3*R*\*)-2,2-Difluoro-3-iodo-1-(4-methoxyphenyl)butan-1-ol (minor-**2s**, 60:40)

Colorless oil.

Rf = 0.40 (hexane:AcOEt = 4:1).

$^1\text{H}$  NMR ( $\text{CDCl}_3$ )  $\delta$  7.38 (2H, d,  $J = 8.4$  Hz), 6.92 (2H, d,  $J = 8.7$  Hz), 5.29 (1H, dt,  $J = 17.9, 5.1$  Hz), 4.49 (1H, ddq,  $J = 19.4, 8.4, 7.1$  Hz), 3.82 (3H, s), 2.33 (1H, br s), 1.95 (3H, d,  $J = 6.9$  Hz) ppm.

$^{13}\text{C}$  NMR ( $\text{CDCl}_3$ )  $\delta$  160.0 (d,  $J = 1.8$  Hz), 129.0, 128.2 (t,  $J = 2.2$  Hz), 120.1 (dd,  $J = 251.2, 248.1$  Hz), 113.8, 73.5 (dd,  $J = 30.7, 25.7$  Hz), 55.3, 20.9 (t,  $J = 3.7$  Hz), 20.7 (td,  $J = 27.9, 3.1$  Hz) ppm.

$^{19}\text{F}$  NMR ( $\text{CDCl}_3$ )  $\delta$  -113.02 (1F, dd,  $J = 248.6, 18.2$  Hz), -119.98 (1F, ddd,  $J = 248.6, 18.2, 9.0$  Hz) ppm.

IR ( $\text{CHCl}_3$ )  $\nu$  3448, 2935, 2838, 1613, 1514, 1452, 1254, 1036, 799, 761  $\text{cm}^{-1}$ .

HRMS (FAB<sup>+</sup>,  $m/z$ ):  $[\text{M}+\text{H}]^+$  calcd for  $\text{C}_{11}\text{H}_{14}\text{F}_2\text{IO}_2^+$ , 343.0001; found, 342.9990.

### General Procedure of Iodoalkoxylation

#### 1-(2,2-Difluoro-3-iodo-1-methoxyprop-1-yl)-4-methoxybenzene (**5aa**)

A mixture of 0.0920 g (0.50 mmol) of 1-(2,2-difluorocycloprop-1-yl)-4-methoxybenzene (**1a**), 0.254 g (1.00 mmol) of I<sub>2</sub> in 0.75 mL of MeOH in a pressure tight glass tube was stirred at 60 °C (oil bath temperature) for 6 h, and the reaction mixture was quenched by sat. NaHCO<sub>3</sub> aq. (2 mL). To the mixture was added sat. Na<sub>2</sub>S<sub>2</sub>O<sub>3</sub> aq. (2 mL), then extracted with CH<sub>2</sub>Cl<sub>2</sub> three times. After the usual workup yielded 0.1594 g (0.466 mmol, yield 93%) of 1-(2,2-difluoro-3-iodo-1-methoxyprop-1-yl)-4-methoxybenzene (**5aa**) [2244675-10-1]<sup>10</sup> as a colorless oil which was found to be virtually pure without purification.

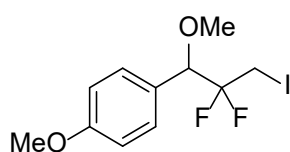

Colorless oil.

R<sub>f</sub> = 0.26 (hexane:AcOEt = 10:1).

<sup>1</sup>H NMR (CDCl<sub>3</sub>) δ 7.31 (2H, d, *J* = 8.4 Hz), 6.92 (2H, d, *J* = 8.4 Hz), 4.56 (1H, dd, *J* = 12.9, 6.9 Hz), 3.81 (3H, s), 3.63 (1H, dt, *J* = 21.9, 11.7 Hz), 3.46-3.28 (1H, m), 3.34 (3H, s) ppm.

<sup>13</sup>C NMR (CDCl<sub>3</sub>) δ 160.1, 129.4, 125.5, 118.7 (t, *J* = 246.9 Hz), 113.8, 81.9 (t, *J* = 27.3 Hz), 57.7, 55.2, 2.0 (t, *J* = 28.4 Hz) ppm.

<sup>19</sup>F NMR (CDCl<sub>3</sub>) δ -102.35 ~ -103.33 (1F, m), -105.91 ~ -106.83 (1F, m) ppm.

IR (CHCl<sub>3</sub>) ν 3006, 2936, 2837, 1612, 1514, 1464, 1253, 1174, 1083, 1017 cm<sup>-1</sup>.

HRMS (FAB<sup>+</sup>, *m/z*): [M]<sup>+</sup> calcd for C<sub>11</sub>H<sub>13</sub>F<sub>2</sub>IO<sub>2</sub><sup>+</sup>, 341.9923; found, 341.9911.

#### 1-(2,2-Difluoro-3-iodo-1-isopropoxyprop-1-yl)-4-methoxybenzene (**5ab**)

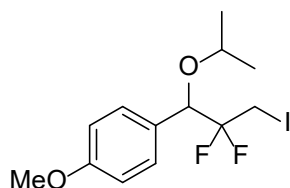

Instead of MeOH (0.75 mL), 2-propanol (0.75 mL) was employed as solvent, and the reaction was continued for 24 h instead of 6 h, 0.178 g (0.480 mmol) of the title compound was obtained in 96% yield.

Yellow oil.

R<sub>f</sub> = 0.33 (hexane:AcOEt = 10:1).

$^1\text{H}$  NMR ( $\text{CDCl}_3$ )  $\delta$  7.33 (2H, d,  $J = 8.4$  Hz), 6.90 (2H, d,  $J = 8.4$  Hz), 4.74 (1H, dd,  $J = 13.2, 6.6$  Hz), 3.82 (3H, s), 3.70-3.58 (2H, m), 3.40 (1H, ddd,  $J = 22.5, 11.7, 5.7$  Hz), 1.20 (3H, d,  $J = 6.0$  Hz), 1.12 (3H, d,  $J = 6.0$  Hz) ppm.

$^{13}\text{C}$  NMR ( $\text{CDCl}_3$ )  $\delta$  159.9, 129.3, 127.0, 118.6 (dd,  $J = 246.9, 245.0$  Hz), 113.7, 77.7 (dd,  $J = 29.8, 26.6$  Hz), 70.7, 55.2, 23.1, 21.1, 2.3 (dd,  $J = 30.5, 28.5$  Hz) ppm.

$^{19}\text{F}$  NMR ( $\text{CDCl}_3$ )  $\delta$  -101.98 ~ -102.99 (1F, m), -105.94 ~ -106.93 (1F, m) ppm.

IR ( $\text{CHCl}_3$ )  $\nu$  2975, 2934, 2839, 1612, 1513, 1252, 1173, 1084, 1013, 837  $\text{cm}^{-1}$ .

HRMS (FAB+,  $m/z$ ):  $[\text{M}+\text{H}]^+$  calcd for  $\text{C}_{13}\text{H}_{18}\text{F}_2\text{IO}_2^+$ , 371.0314; found, 371.0315.

#### 1-(2,2-Difluoro-3-iodo-1-*tert*-butoxyprop-1-yl)-4-methoxybenzene (**5ac**)

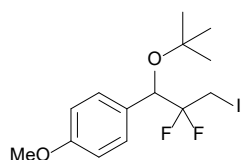

Instead of MeOH (0.75 mL), *tert*-butanol (0.75 mL) was employed as solvent with 2.0 eq. of  $\text{K}_2\text{CO}_3$  as an additive to afford 0.059 g (0.153 mmol) of the title compound was obtained in 61% yield.

White solid.

m.p.: 120.7 - 121.3  $^\circ\text{C}$

R<sub>f</sub> = 0.69 (hexane:AcOEt = 4:1).

$^1\text{H}$  NMR ( $\text{CDCl}_3$ )  $\delta$  7.35 (2H, d,  $J = 8.4$  Hz), 6.87 (2H, d,  $J = 8.7$  Hz), 4.81 (1H, t,  $J = 8.7$  Hz), 3.81 (3H, s), 3.63 (1H, ddd,  $J = 27.3, 11.7, 6.0$  Hz), 3.27 (1H, ddd,  $J = 26.7, 12.0, 5.1$  Hz), 1.15 (9H, s) ppm.

$^{13}\text{C}$  NMR ( $\text{CDCl}_3$ )  $\delta$  159.6, 129.9 (d,  $J = 4.3$  Hz), 128.8, 118.9 (t,  $J = 245.6$  Hz), 113.5, 76.0, 73.4 (t,  $J = 28.5$  Hz), 55.2, 28.4, 2.7 (t,  $J = 28.5$  Hz) ppm.

$^{19}\text{F}$  NMR ( $\text{CDCl}_3$ )  $\delta$  -101.41 (1F, ddt,  $J = 239.4, 27.4, 9.0$  Hz), -104.61 (1F, dddd,  $J = 239.7, 27.4, 9.0, 4.5$  Hz) ppm.

IR ( $\text{CHCl}_3$ )  $\nu$  2973, 2933, 1612, 1584, 1512, 1250, 1085, 893, 573, 537  $\text{cm}^{-1}$ .

HRMS (FAB+,  $m/z$ ):  $[\text{M}]^+$  calcd for  $\text{C}_{14}\text{H}_{19}\text{F}_2\text{IO}_2^+$ , 384.0392; found, 384.0382.

#### 2-{2,2-Difluoro-3-iodo-1-(4-methoxyphenyl)propyloxy}ethan-1-ol (**5ad**) [2244675-11-2]<sup>10</sup>

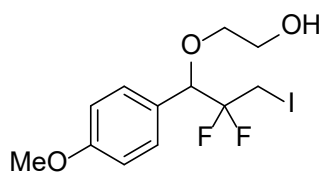

Instead of MeOH (0.75 mL), ethylene glycol (0.75 mL) was employed as solvent to afford 0.184 g

(0.495 mmol) of the title compound was obtained in 99% yield.

Colorless oil.

R<sub>f</sub> = 0.40 (hexane:AcOEt = 2:1).

<sup>1</sup>H NMR (CDCl<sub>3</sub>) δ 7.34-7.26 (2H, m), 6.95-6.90 (2H, m), 4.75 (1H, dd, *J* = 12.3, 7.5 Hz), 3.82 (3H, s), 3.80-3.72 (2H, m), 3.68-3.51 (3H, m), 3.38 (1H, ddd, *J* = 18.6, 11.7, 6.9 Hz), 1.92 (1H, t, *J* = 6.0 Hz) ppm.

<sup>13</sup>C NMR (CDCl<sub>3</sub>) δ 160.1, 129.3, 125.6, 118.6 (t, *J* = 245.0 Hz), 113.9, 80.7 (dd, *J* = 29.8, 27.3 Hz), 71.3, 61.6, 55.2, 1.9 (t, *J* = 29.2 Hz) ppm.

<sup>19</sup>F NMR (CDCl<sub>3</sub>) δ -102.97 (1F, dddd, *J* = 248.7, 20.3, 11.3, 6.8 Hz), -105.77 (1F, dddd, *J* = 248.7, 18.1, 11.3, 6.8 Hz) ppm.

IR (CHCl<sub>3</sub>) ν 2935, 2881, 2834, 1613, 1515, 1462, 1253, 1174, 1123, 1013 cm<sup>-1</sup>.

HRMS (FAB<sup>+</sup>, *m/z*): [M+H]<sup>+</sup> calcd for C<sub>12</sub>H<sub>16</sub>F<sub>2</sub>IO<sub>3</sub><sup>+</sup>, 373.0107; found, 373.0129.

#### 1-(3,3-Difluoro-4-iodo-2-methoxybut-2-yl)-4-methoxybenzene (**5ja**)

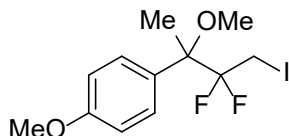

Instead of 0.5 mmol of 1-(2,2-difluorocycloprop-1-yl)-4-methoxybenzene, 0.0992 g (0.5 mmol) of 1-(2,2-difluoro-1-methylcycloprop-1-yl)-4-methoxybenzene was employed to afford 0.165 g of the title compound (0.464 mmol) in 93% yield.

Colorless oil.

R<sub>f</sub> = 0.39 (hexane:AcOEt = 4:1).

<sup>1</sup>H NMR (CDCl<sub>3</sub>) δ 7.34-7.30 (2H, m), 6.92-6.87 (2H, m), 3.81 (3H, s), 3.79-3.65 (1H, m), 3.38-3.65 (1H, m), 3.23 (3H, s), 1.73 (3H, s) ppm.

<sup>13</sup>C NMR (CDCl<sub>3</sub>) δ 159.4, 129.7, 128.9, 119.4 (dd, *J* = 251.2, 246.2 Hz), 113.6, 80.4 (dd, *J* = 27.9, 26.0 Hz), 55.2, 50.7, 17.7 (t, *J* = 3.1 Hz), 1.9 (t, *J* = 27.9 Hz) ppm.

<sup>19</sup>F NMR (CDCl<sub>3</sub>) δ -104.33 (1F, dd, *J* = 239.4, 34.2 Hz), -107.14 (1F, dd, *J* = 239.4, 31.9 Hz) ppm.

IR (CHCl<sub>3</sub>) ν 2995, 2955, 2837, 1733, 1611, 1512, 1464, 1302, 1254, 1180 cm<sup>-1</sup>.

HRMS (FAB<sup>+</sup>, *m/z*): [M+H]<sup>+</sup> calcd for C<sub>12</sub>H<sub>16</sub>F<sub>2</sub>IO<sub>2</sub><sup>+</sup>, 357.0158; found, 357.0133.

#### 3,3-Difluoro-4-iodo-2-(4-methoxyphenyl)tetrahydrofuran (**6**)

Instead of 0.5 mmol of 1-(2,2-difluorocycloprop-1-yl)-4-methoxybenzene, 0.1072 g (0.5 mmol) of *trans*-{2,2-difluoro-3-(4-methoxyphenyl)cycloprop-1-yl}methanol was employed and the reaction was continued for 48 h instead of 6 h, 0.112 g (0.328 mmol) of the title compound was

obtained in 66% combined yield whose diastereomer ratio was 65:35.

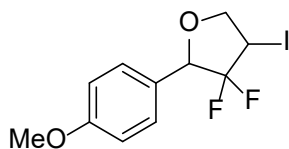

**major isomer**

White solid.

m.p.: 45.0 - 46.3 °C

R<sub>f</sub> = 0.29 (hexane:AcOEt = 10:1).

<sup>1</sup>H NMR (CDCl<sub>3</sub>) δ 7.30 (2H, d, *J* = 8.1 Hz), 6.93 (2H, d, *J* = 8.1 Hz), 4.92 (1H, dd, *J* = 13.2, 11.1 Hz), 4.54 (1H, dd, *J* = 16.2, 7.8 Hz), 4.47-4.36 (1H, m), 4.11 (1H, t, *J* = 9.3 Hz), 3.82 (3H, s) ppm.

<sup>13</sup>C NMR (CDCl<sub>3</sub>) δ 160.1, 128.3, 125.3 (dd, *J* = 3.1, 1.9 Hz), 124.2 (dd, *J* = 258.6, 254.2 Hz), 113.8, 81.5 (dd, *J* = 34.1, 25.4 Hz), 73.5 (dd, *J* = 5.7, 1.9 Hz), 55.2, 19.8 (dd, *J* = 29.8, 23.6 Hz) ppm.

<sup>19</sup>F NMR (CDCl<sub>3</sub>) δ -94.67 (1F, ddd, *J* = 225.8, 13.7, 11.3 Hz), -109.93 (1F, ddd, *J* = 225.8, 13.6, 11.3 Hz) ppm.

IR (CHCl<sub>3</sub>) ν 2969, 2938, 2863, 1610, 1516, 1464, 1347, 1304, 1253, 1042 cm<sup>-1</sup>.

HRMS (FAB<sup>+</sup>, *m/z*): [M+H]<sup>+</sup> calcd for C<sub>11</sub>H<sub>12</sub>F<sub>2</sub>IO<sub>2</sub><sup>+</sup>, 340.9845; found, 340.9829.

**minor isomer**

White solid.

m.p.: 75.6 - 77.2 °C

R<sub>f</sub> = 0.26 (hexane:AcOEt = 10:1).

<sup>1</sup>H NMR (CDCl<sub>3</sub>) δ 7.35-7.31 (2H, m), 6.95-6.90 (2H, m), 5.00 (1H, dd, *J* = 16.8, 8.4 Hz), 4.67-4.47 (2H, m), 4.31 (1H, ddd, *J* = 9.6, 8.7, 1.2 Hz), 3.82 (3H, s) ppm.

<sup>13</sup>C NMR (CDCl<sub>3</sub>) δ 160.1, 128.4, 125.0 (d, *J* = 1.8 Hz), 122.7 (dd, *J* = 256.8, 254.3 Hz), 113.8, 80.2 (dd, *J* = 31.0, 26.0 Hz), 73.9 (d, *J* = 7.5 Hz), 55.2, 19.2 (dd, *J* = 26.0, 24.8 Hz) ppm.

<sup>19</sup>F NMR (CDCl<sub>3</sub>) δ -102.57 (1F, dt, *J* = 223.6, 16.0 Hz), -116.01 (1F, dt, *J* = 223.6, 7.9 Hz) ppm.

IR (CHCl<sub>3</sub>) ν 3013, 2936, 2839, 1611, 1584, 1514, 1453, 1327, 1253, 1027 cm<sup>-1</sup>.

HRMS (FAB<sup>+</sup>, *m/z*): [M+H]<sup>+</sup> calcd for C<sub>11</sub>H<sub>12</sub>F<sub>2</sub>IO<sub>2</sub><sup>+</sup>, 340.9845; found, 340.9846.

### General Procedure of Iodosulfenylation

A mixture of 0.0923 g (0.50 mmol) of 1-(2,2-difluorocycloprop-1-yl)-4-methoxybenzene (**1a**), 0.0678 g (0.275 mmol) of dibenzyl disulfide and 0.254 g (1.00 mmol) of I<sub>2</sub> in 0.75 mL of 1,2-dichloroethane in a pressure tight glass tube was stirred at 60 °C (oil bath temperature) for 6 h, and the reaction mixture was quenched by sat. Na<sub>2</sub>S<sub>2</sub>O<sub>3</sub> aq. (5 mL). The crude mixture was then extracted with CH<sub>2</sub>Cl<sub>2</sub> three times and washed by sat. Na<sub>2</sub>S<sub>2</sub>O<sub>3</sub> aq. (5 mL). After drying over anhydrous Na<sub>2</sub>SO<sub>4</sub> and concentration, the crude product was purified by silica gel column chromatography yielded 0.1594 g (0.466 mmol, yield 93%) of 1-[(1-benzylsulfenyl-2,2-difluoro-3-iodo)prop-1-yl]-4-methoxybenzene (**7aa**) [2244675-00-9]<sup>10</sup> as a colorless oil.

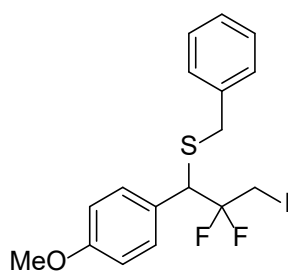

White solid.

m.p.: 47.5 - 49.8 °C.

R<sub>f</sub> = 0.24 (hexane:Et<sub>2</sub>O = 20:1).

<sup>1</sup>H NMR (CDCl<sub>3</sub>) δ 7.34-7.24 (7H, m), 6.86 (2H, d, *J* = 8.7 Hz), 4.16 (1H, t, *J* = 13.8 Hz), 3.81 (3H, s), 3.78 (1H, d, *J* = 13.2 Hz), 3.57 (1H, d, *J* = 13.2 Hz), 3.51 (1H, ddd, *J* = 25.8, 12.0, 11.7 Hz), 3.33 (1H, ddd, *J* = 16.8, 12.9, 11.7 Hz) ppm.

<sup>13</sup>C NMR (CDCl<sub>3</sub>) δ 159.5, 136.8, 130.4, 129.1, 128.5, 127.3, 126.8 (dd, *J* = 3.1, 1.9 Hz), 120.2 (t, *J* = 246.9 Hz), 114.0, 55.2, 51.4 (t, *J* = 25.4 Hz), 36.2, 3.7 (t, *J* = 30.4 Hz) ppm.

<sup>19</sup>F NMR (CDCl<sub>3</sub>) δ -95.23 ~ -96.24 (1F, m), -96.26 ~ -97.31 (1F, m) ppm.

1-[(2,2-Difluoro-3-iodo-1-methylsulfenyl)prop-1-yl]-4-methoxybenzene (**7ab**) [2244675-12-3]<sup>10</sup>

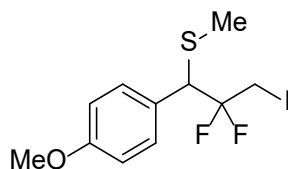

Instead of 0.275 mmol of dibenzyl disulfide, 0.0259 g (0.275 mmol) of dimethyl disulfide was employed to afford 0.170 g of the title compound (0.474 mmol) in 95% yield.

Yellow oil.

R<sub>f</sub> = 0.24 (hexane:Et<sub>2</sub>O = 20:1).

<sup>1</sup>H NMR (CDCl<sub>3</sub>) δ 7.34 (2H, d, *J* = 8.7 Hz), 6.88 (2H, d, *J* = 8.7 Hz), 4.31 (1H, dd, *J* = 14.4, 12.3 Hz), 3.80 (3H, s), 3.66-3.53 (1H, m), 3.44-3.30 (1H, m), 2.08 (3H, s) ppm.

$^{13}\text{C}$  NMR ( $\text{CDCl}_3$ )  $\delta$  159.5, 130.3, 126.7 (dd,  $J = 3.1, 1.2$  Hz), 120.4 (t,  $J = 246.9$  Hz), 114.0, 55.2, 54.5 (t,  $J = 25.1$  Hz), 15.8 (dd,  $J = 1.8, 1.2$  Hz), 3.7 (t,  $J = 30.7$  Hz) ppm.

$^{19}\text{F}$  NMR ( $\text{CDCl}_3$ )  $\delta$  -95.29 ~ -96.29 (1F, m), -96.72 ~ -97.73 (1F, m) ppm.

1-[(1-Decylsulfenyl-2,2-difluoro-3-iodo)prop-1-yl]-4-methoxybenzene (**7ac**) [2244675-13-4]<sup>10</sup>

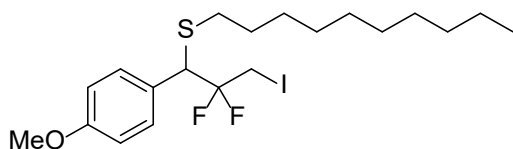

Instead of 0.275 mmol of dibenzyl disulfide, 0.0953 g (0.275 mmol) of didecyl disulfide was employed to afford 0.215 g of the title compound (0.443 mmol) in 89% yield.

Yellow oil.

R<sub>f</sub> = 0.50 (hexane:AcOEt = 10:1).

$^1\text{H}$  NMR ( $\text{CDCl}_3$ )  $\delta$  7.38-7.32 (2H, m), 6.90-6.86 (2H, m), 4.38 (1H, t,  $J = 13.5$  Hz), 3.80 (3H, s), 3.62 (1H, ddd,  $J = 16.2, 12.6, 11.7$  Hz), 3.38 (1H, ddd,  $J = 16.2, 12.9, 11.4$  Hz), 2.50 (2H, t,  $J = 7.4$  Hz), 1.58-1.48 (2H, m), 1.32-1.24 (14H, m), 0.88 (3H, t,  $J = 6.8$  Hz) ppm.

$^{13}\text{C}$  NMR ( $\text{CDCl}_3$ )  $\delta$  159.5, 130.3, 127.3 (dd,  $J = 2.5, 1.9$  Hz), 120.3 (t,  $J = 246.9$  Hz), 113.9, 55.2, 52.8 (t,  $J = 24.7$  Hz), 32.5, 31.8, 29.5, 29.4, 29.3, 29.1, 29.0, 28.6, 22.6, 14.1, 3.8 (t,  $J = 31.0$  Hz) ppm.

$^{19}\text{F}$  NMR ( $\text{CDCl}_3$ )  $\delta$  -96.64 ~ -96.93 (m) ppm.

1-[(1-Cyclohexylsulfenyl-2,2-difluoro-3-iodo)propyl]-4-methoxybenzene (**7ad**) [2244675-14-5]<sup>10</sup>

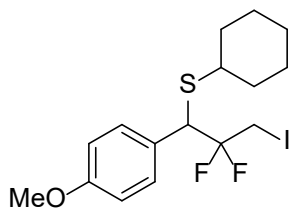

Instead of 0.275 mmol of dibenzyl disulfide, 0.0637 g (0.275 mmol) of dicyclohexyl disulfide was employed to afford 0.178 g of the title compound (0.417 mmol) in 83% yield.

Pale yellow oil.

R<sub>f</sub> = 0.34 (hexane:AcOEt = 10:1).

$^1\text{H}$  NMR ( $\text{CDCl}_3$ )  $\delta$  7.34 (2H, d,  $J = 8.7$  Hz), 6.89-6.85 (2H, m), 4.46 (1H, t,  $J = 13.5$  Hz), 3.81 (3H, s), 3.64 (1H, td,  $J = 14.4, 11.3$  Hz), 3.40 (1H, td,  $J = 14.4, 11.4$  Hz), 2.70-2.61 (1H, m), 1.98-1.93 (1H, m), 1.88-1.84 (1H, m), 1.75-1.67 (2H, m), 1.36-1.22 (6H, m) ppm.

$^{13}\text{C}$  NMR ( $\text{CDCl}_3$ )  $\delta$  159.4, 130.3, 128.0 (dd,  $J = 2.5, 1.9$  Hz), 120.1 (t,  $J = 246.9$  Hz), 113.9, 55.2,

51.0 (t,  $J = 25.5$  Hz), 44.0, 33.2 (d,  $J = 2.5$  Hz), 25.7 (d,  $J = 6.7$  Hz), 25.6, 3.9 (t,  $J = 31.0$  Hz) ppm.

$^{19}\text{F}$  NMR ( $\text{CDCl}_3$ )  $\delta$  -96.53 ~ -96.68 (m) ppm.

1-[(2,2-Difluoro-3-iodo-1-phenylsulfenyl)prop-1-yl]-4-methoxybenzene (**7ae**) [2244675-01-0]<sup>10</sup>

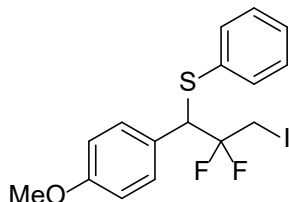

Instead of 0.275 mmol of dibenzyl disulfide, 0.0604 g (0.275 mmol) of diphenyl disulfide was employed to afford 0.199 g of the title compound (0.473 mmol) in 95% yield.

Colorless oil.

R<sub>f</sub> = 0.28 (hexane:AcOEt = 10:1).

$^1\text{H}$  NMR ( $\text{CDCl}_3$ )  $\delta$  7.37-7.32 (2H, m), 7.30 (1H, s), 7.27 (1H, s), 7.25-7.22 (3H, m), 6.86-6.81 (2H, m), 4.66 (1H, dd,  $J = 15.0, 13.2$  Hz), 3.78 (3H, s), 3.59 (1H, td,  $J = 17.1, 11.7$  Hz), 3.40 (1H, td,  $J = 17.1, 12.0$  Hz) ppm.

$^{13}\text{C}$  NMR ( $\text{CDCl}_3$ )  $\delta$  160.0, 135.4, 132.9, 130.3 (dd,  $J = 1.8, 1.2$  Hz), 129.0, 128.0, 127.4 (dd,  $J = 2.5, 1.3$  Hz), 119.9 (t,  $J = 247.5$  Hz), 114.0, 57.4 (t,  $J = 24.8$  Hz), 55.2, 3.7 (t,  $J = 30.4$  Hz) ppm.

$^{19}\text{F}$  NMR ( $\text{CDCl}_3$ )  $\delta$  -95.50 ~ -97.89 (2F, m) ppm.

Methyl 3-{1-[2,2-difluoro-3-iodo-1-(4-methoxyphenyl)prop-1-yl]sulfenyl}propanoate (**7af**)

[2244675-15-6]<sup>10</sup>

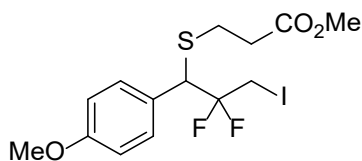

Instead of 0.275 mmol of dibenzyl disulfide, 0.0655 g (0.275 mmol) of dimethyl 3,3'-disulfanediyldipropionate was employed to afford 0.167 g of the title compound (0.388 mmol) in 78% yield.

Colorless oil.

R<sub>f</sub> = 0.40 (toluene:CH<sub>2</sub>Cl<sub>2</sub> = 1:1).

$^1\text{H}$  NMR ( $\text{CDCl}_3$ )  $\delta$  7.35 (2H, d,  $J = 8.7$  Hz), 6.90-6.86 (2H, m), 4.47 (1H, dd,  $J = 14.7, 12.3$  Hz), 3.81 (3H, s), 3.67 (3H, s), 3.58 (1H, ddd,  $J = 17.4, 11.4, 10.8$  Hz), 3.35 (1H, ddd,  $J = 17.4, 12.3, 11.7$  Hz), 2.88-2.72 (2H, m), 2.56 (t,  $J = 7.2$  Hz) ppm.

$^{13}\text{C}$  NMR ( $\text{CDCl}_3$ )  $\delta$  171.8, 159.6, 130.2, 126.8 (dd,  $J = 3.1, 1.2$  Hz), 120.0 (t,  $J = 246.9$  Hz), 114.0,



55.2, 53.1 (t,  $J = 25.5$  Hz), 51.7, 34.2, 27.2, 3.5 (t,  $J = 31.1$  Hz) ppm.

$^{19}\text{F}$  NMR ( $\text{CDCl}_3$ )  $\delta$  -95.55 ~ -96.55 (1F, m), -97.09 ~ -98.10 (1F, m) ppm.

*N*-{2-[2,2-Difluoro-3-iodo-1-(4-methoxyphenyl)prop-1-yl]sulfenyl}phenyl]benzamide (**7ag**)

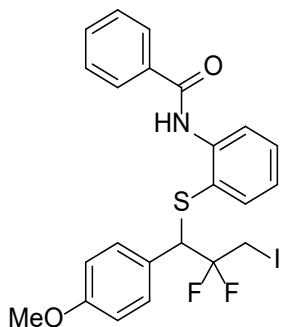

Instead of 0.275 mmol of dibenzyl disulfide, 0.126 g (0.275 mmol) of bis(2-benzamidophenyl) disulfide was employed and the reaction was conducted in 0.50 mL of 1,2-dichloroethane and 0.25 mL of MeCN to afford 0.143 g of the title compound (0.265 mmol) in 53% yield.

White solid.

m.p.: 105.3 - 106.9 °C.

R<sub>f</sub> = 0.34 (hexane:CH<sub>2</sub>Cl<sub>2</sub> = 2:1).

$^1\text{H}$  NMR ( $\text{CDCl}_3$ )  $\delta$  9.21 (1H, br s) 8.59 (1H, dd,  $J = 8.1, 1.1$  Hz), 7.77-7.73 (2H, m), 7.57-7.51 (1H, m), 7.47-7.39 (4H, m), 7.16-7.39 (2H, m), 7.01 (1H, td,  $J = 6.3, 1.2$  Hz), 6.70-6.65 (2H, m), 4.34 (1H, dd,  $J = 21.0, 8.7$  Hz), 3.71 (3H, s), 3.43 (1H, ddd,  $J = 17.7, 11.7, 8.7$  Hz), 3.21 (1H, ddd,  $J = 17.4, 14.7, 11.7$  Hz) ppm.

$^{13}\text{C}$  NMR ( $\text{CDCl}_3$ )  $\delta$  164.9, 159.7, 140.6, 137.3, 134.3, 131.8, 131.3, 129.8, 127.1, 127.0, 124.0, 120.9, 120.1, 120.0 (t,  $J = 246.9$  Hz), 114.2, 58.8 (dd,  $J = 26.0, 24.1$  Hz), 55.1, 2.9 (t,  $J = 30.3$  Hz) ppm.

$^{19}\text{F}$  NMR ( $\text{CDCl}_3$ )  $\delta$  -93.46 ~ -98.98 (1F, m), -98.98 ~ -100.00 (1F, m) ppm.

IR (KBr)  $\nu$  3330, 3034, 2963, 2835, 1671, 1512, 1306, 1254, 1184, 1006  $\text{cm}^{-1}$ .

HRMS (FAB<sup>+</sup>,  $m/z$ ):  $[\text{M}+\text{H}]^+$  calcd for  $\text{C}_{23}\text{H}_{21}\text{F}_2\text{INO}_2\text{S}^+$ , 540.0300; found, 540.0282.

4-{1-(Benzylsulfenyl-2,2-difluoro-3-iodo)prop-1-yl}phenol (**7da**)

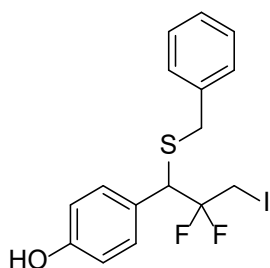

Instead of 0.5 mmol of **1a**, 0.0851 g (0.5 mmol) of 1-(2,2-difluorocycloprop-1-yl)phenol (**1d**) was

employed to afford 0.2018 g of the title compound (0.480 mmol) in 96% yield.

White solid.

m.p.: 91.8 - 93.2 °C.

R<sub>f</sub> = 0.19 (hexane:AcOEt = 4:1).

<sup>1</sup>H NMR (CDCl<sub>3</sub>) δ 7.34-7.09 (7H, m), 6.82-6.77 (2H, m), 4.89 (1H, s), 4.15 (1H, t, *J* = 13.7 Hz), 3.80 (1H, d, *J* = 13.7 Hz), 3.58 (1H, d, *J* = 13.5 Hz), 3.58 (1H, ddd, *J* = 16.2, 12.9, 11.7 Hz), 3.49 (1H, ddd, *J* = 16.5, 13.5, 11.7 Hz) ppm.

<sup>13</sup>C NMR (CDCl<sub>3</sub>) δ 155.5, 136.7, 130.6, 129.1, 128.5, 127.3, 127.0 (dd, *J* = 3.1, 1.2 Hz), 120.2 (t, *J* = 246.8 Hz), 115.5, 51.4 (t, *J* = 25.1 Hz), 36.2, 3.6 (t, *J* = 30.3 Hz) ppm.

<sup>19</sup>F NMR (CDCl<sub>3</sub>) δ -95.35 ~ -97.29 (m) ppm.

IR (CHCl<sub>3</sub>) ν 3011, 1611, 1512, 1254, 1216, 1179, 1077, 1034, 1002, 758 cm<sup>-1</sup>.

HRMS (FAB<sup>+</sup>, *m/z*): [M+H]<sup>+</sup> calcd for C<sub>16</sub>H<sub>16</sub>F<sub>2</sub>IOS<sup>+</sup>, 420.9929; found, 420.9953.

1-{(2-Benzylsulfenyl-3,3-difluoro-4-iodo)but-2-yl}-4-methoxybenzene (**7ja**)

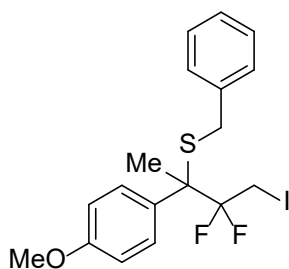

Instead of 0.5 mmol of **1a**, 0.0991 g (0.5 mmol) of 1-(2,2-difluoro-1-methylcycloprop-1-yl)-4-methoxybenzene (**1j**) was employed and the reaction was conducted at 25 °C to afford 0.1753 g of the title compound (0.391 mmol) in 96% yield.

Yellow oil.

R<sub>f</sub> = 0.50 (hexane:AcOEt = 4:1).

<sup>1</sup>H NMR (CDCl<sub>3</sub>) δ 7.61 (2H, d, *J* = 9.0 Hz), 7.29-7.23 (5H, m), 6.92-6.89 (2H, m), 3.83 (3H, s), 3.78-3.47 (4H, m), 1.97 (3H, s) ppm.

<sup>13</sup>C NMR (CDCl<sub>3</sub>) δ 159.2, 136.6, 130.2, 129.6, 129.1, 127.2, 121.4 (t, *J* = 250.6 Hz), 113.7, 56.5, 55.2, 34.8, 22.7 (d, *J* = 3.1 Hz), 4.1 (t, *J* = 29.2 Hz) ppm.

<sup>19</sup>F NMR (CDCl<sub>3</sub>) δ -95.92 ~ -97.84 (m) ppm.

IR (CHCl<sub>3</sub>) ν 3019, 1609, 1543, 1509, 1458, 1256, 1216, 1031, 757, 670 cm<sup>-1</sup>.

HRMS (FAB<sup>+</sup>, *m/z*): [M]<sup>+</sup> calcd. for C<sub>18</sub>H<sub>19</sub>F<sub>2</sub>IOS<sup>+</sup>, 448.0164; found, 448.0159.

### General Procedure of Iodoarylation

A mixture of 0.0922 g (0.50 mmol) of 1-(2,2-difluorocycloprop-1-yl)-4-methoxybenzene (**1a**), 0.0941 g (1.00 mmol) of phenol, 0.254 g (1.00 mmol) of I<sub>2</sub> and 0.1382 g (1.00 mmol) of K<sub>2</sub>CO<sub>3</sub> in 0.75 mL of 1,2-dichloroethane in a pressure tight glass tube was stirred at 80 °C (oil bath temperature) for 6 h, and the reaction mixture was quenched by sat. Na<sub>2</sub>S<sub>2</sub>O<sub>3</sub> aq. (5 mL). The resultant mixture was then extracted with CH<sub>2</sub>Cl<sub>2</sub> three times and washed by sat. Na<sub>2</sub>S<sub>2</sub>O<sub>3</sub> aq. (5 mL). After drying over anhydrous Na<sub>2</sub>SO<sub>4</sub> and concentration, the crude product was purified by silica gel column chromatography to obtain 0.153 g (0.379 mmol, yield 76%) of 4-[2,2-difluoro-3-iodo-1-(4-methoxyphenyl)prop-1-yl]phenol (**8aa**) as a colorless oil.

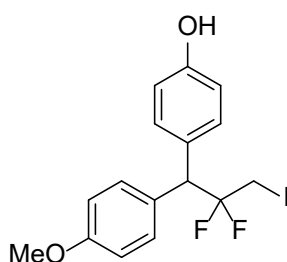

Colorless oil.

R<sub>f</sub> = 0.30 (hexane:AcOEt = 4:1).

<sup>1</sup>H NMR (CDCl<sub>3</sub>) δ 7.34 (2H, d, *J* = 8.7 Hz), 7.29 (2H, d, *J* = 8.4 Hz), 6.86 (2H, d, *J* = 9.0 Hz), 6.78 (2H, d, *J* = 9.0 Hz), 4.92 (1H, s), 4.62 (1H, t, *J* = 17.0 Hz), 3.78 (3H, s), 3.40 (2H, t, *J* = 14.4 Hz) ppm.

<sup>13</sup>C NMR (CDCl<sub>3</sub>) δ 158.8, 154.9, 130.5, 130.3, 129.5, 129.4, 120.9 (t, *J* = 247.4 Hz), 115.5, 114.1, 55.3, 54.4 (t, *J* = 23.2 Hz), 4.7 (t, *J* = 29.5 Hz) ppm.

<sup>19</sup>F NMR (CDCl<sub>3</sub>) δ -97.51 ~ -97.73 (m) ppm.

IR (CHCl<sub>3</sub>) ν 3585, 3402, 3018, 1612, 1513, 1253, 1216, 1177, 1001, 754 cm<sup>-1</sup>.

HRMS (FAB<sup>+</sup>, *m/z*): [M]<sup>+</sup> calcd for C<sub>16</sub>H<sub>15</sub>F<sub>2</sub>IO<sub>2</sub><sup>+</sup>, 404.0079; found, 404.0090.

### 2,2-Difluoro-3-iodo-1,1-bis(4-methoxyphenyl)propane (**8ab**)

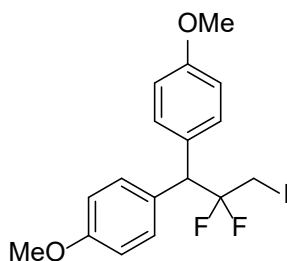

Instead of 1.0 mmol of phenol, 0.1084 g (1.0 mmol) of anisole was employed to afford 0.161 g of the title compound (0.386 mmol) in 77% yield.

Colorless oil.

R<sub>f</sub> = 0.54 (hexane:AcOEt = 4:1).

$^1\text{H}$  NMR ( $\text{CDCl}_3$ )  $\delta$  7.34 (4H, d,  $J = 8.7$  Hz), 6.86 (4H, d,  $J = 8.7$  Hz), 4.63 (1H, t,  $J = 16.8$  Hz), 3.78 (6H, s), 3.40 (1H, t,  $J = 14.4$  Hz) ppm.

$^{13}\text{C}$  NMR ( $\text{CDCl}_3$ )  $\delta$  158.8, 130.3, 129.3, 120.8 (t,  $J = 247.5$  Hz), 114.0, 55.1, 54.4 (t,  $J = 23.2$  Hz), 4.8 (t,  $J = 30.7$  Hz) ppm.

$^{19}\text{F}$  NMR ( $\text{CDCl}_3$ )  $\delta$  -97.57 (q,  $J = 14.8$  Hz) ppm.

IR ( $\text{CHCl}_3$ )  $\nu$  3585, 3402, 3018, 1612, 1513, 1253, 1216, 1177, 1001, 754  $\text{cm}^{-1}$ .

HRMS (FAB $^+$ ,  $m/z$ ):  $[\text{M}+\text{H}]^+$  calcd for  $\text{C}_{17}\text{H}_{18}\text{F}_2\text{IO}_2^+$ , 419.0314; found, 419.0321.

1-[2,2-Difluoro-3-iodo-1-(4-methylphenyl)prop-1-yl]-4-methoxybenzene (**8ac**)

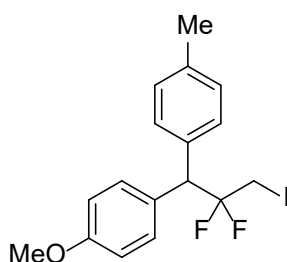

Instead of of 1.0 mmol of  $\text{K}_2\text{CO}_3$ , 0.1226 g (1.0 mmol) of nitrobenzene was employed. Instead of 1.0 mmol of phenol, 0.75 mL of toluene was used as reagent and solvent to afford 0.141 g of the title compound (0.350 mmol) in 70% yield.

Colorless oil.

$R_f = 0.59$  (hexane:AcOEt = 4:1).

$^1\text{H}$  NMR ( $\text{CDCl}_3$ )  $\delta$  7.36-7.30 (2H, m), 7.14-7.12 (2H, m), 6.88-6.82 (2H, m), 4.63 (1H, t,  $J = 17.1$  Hz), 3.78 (3H, s), 3.41 (2H, t,  $J = 14.4$  Hz), 2.31 (3H, s) ppm.

$^{13}\text{C}$  NMR ( $\text{CDCl}_3$ )  $\delta$  158.8, 137.2, 134.2, 131.0 (d,  $J = 2.5$  Hz), 130.3, 129.4, 129.1, 120.8 (t,  $J = 247.5$  Hz), 114.0, 55.2, 54.9 (t,  $J = 22.9$  Hz), 21.0, 4.8 (t,  $J = 31.0$  Hz) ppm.

$^{19}\text{F}$  NMR ( $\text{CDCl}_3$ )  $\delta$  -97.53 (q,  $J = 15.3$  Hz) ppm.

IR ( $\text{CHCl}_3$ )  $\nu$  3007, 2932, 2837, 1610, 1513, 1253, 1181, 1001, 810, 758  $\text{cm}^{-1}$ .

HRMS (FAB $^+$ ,  $m/z$ ):  $[\text{M}]^+$  calcd for  $\text{C}_{17}\text{H}_{17}\text{F}_2\text{IO}^+$ , 41402.0287; found, 402.0289.

4-[2,2-Difluoro-3-iodo-1-(4-methoxyphenyl)prop-1-yl]-2,6-dimethylphenol (**8ad**)

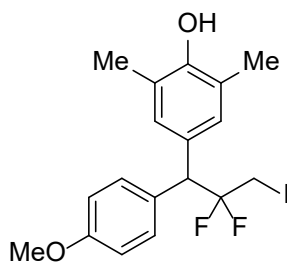

Instead of 1.0 mmol of phenol, 0.1223 g (1.0 mmol) of 2,6-dimethylphenol was employed to afford 0.171 g of the title compound (0.396 mmol) in 79% yield.

Orange high viscose oil.

R<sub>f</sub> = 0.31 (hexane:AcOEt = 4:1).

<sup>1</sup>H NMR (CDCl<sub>3</sub>) δ 7.34 (2H, d, *J* = 8.4 Hz), 7.02 (2H, s), 6.85 (2H, d, *J* = 8.4 Hz), 4.57 (1H, s), 4.52 (1H, t, *J* = 17.4 Hz), 3.78 (3H, s), 3.41 (2H, t, *J* = 14.6 Hz), 2.22 (6H, s) ppm.

<sup>13</sup>C NMR (CDCl<sub>3</sub>) δ 158.7, 151.6, 130.2, 129.5 (d, *J* = 3.1 Hz), 129.3, 128.8 (d, *J* = 3.8 Hz), 123.2, 120.8 (t, *J* = 247.5 Hz), 113.9, 53.1, 54.5 (t, *J* = 23.3 Hz), 16.0, 5.0 (t, *J* = 30.7 Hz) ppm.

<sup>19</sup>F NMR (CDCl<sub>3</sub>) δ -96.88 (1F, dq, *J* = 243.0, 13.6 Hz), -98.00 (1F, dq, *J* = 243.0, 16.0 Hz) ppm.

IR (CHCl<sub>3</sub>) ν 3599, 3493, 3009, 2916, 2838, 1610, 1512, 1253, 1000, 757 cm<sup>-1</sup>.

HRMS (FAB<sup>+</sup>, *m/z*): [M]<sup>+</sup> calcd for C<sub>18</sub>H<sub>19</sub>F<sub>2</sub>IO<sub>2</sub><sup>+</sup>, 432.0392; found, 432.0377.

2-[2,2-Difluoro-3-iodo-1-(4-methoxyphenyl)prop-1-yl]furan (**8ae**)

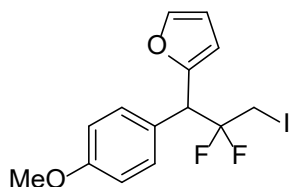

Instead of 1.0 mmol of phenol, 0.2045 g (3.0 mmol) of furan and 0.0782 g (1.0 mmol) of DMSO was employed and the reaction was conducted at 40 °C for 9 h to afford 0.154 g of the title compound (0.408 mmol) in 82% yield.

Pale yellow oil.

R<sub>f</sub> = 0.51 (hexane:AcOEt = 4:1).

<sup>1</sup>H NMR (CDCl<sub>3</sub>) δ 7.39-7.38 (1H, m), 7.37 (2H, d, *J* = 8.7 Hz), 6.88 (2H, d, *J* = 8.7 Hz), 6.36 (2H, d, *J* = 1.5 Hz), 4.79 (1H, t, *J* = 15.0 Hz), 3.80 (3H, s), 3.54-3.29 (2H, m) ppm.

<sup>13</sup>C NMR (CDCl<sub>3</sub>) δ 159.4, 150.2, 142.4, 130.6, 126.6, 119.7 (t, *J* = 248.1 Hz), 114.1, 110.5, 108.9, 55.2, 49.5 (t, *J* = 24.8 Hz), 3.8 (t, *J* = 30.1 Hz) ppm.

<sup>19</sup>F NMR (CDCl<sub>3</sub>) δ -97.33 (1F, ddt, *J* = 241.8, 18.2, 13.7 Hz), -98.62 (1F, dtd, *J* = 242.9, 17.1, 11.4 Hz) ppm.

IR (CHCl<sub>3</sub>) ν 3009, 2838, 1609, 1514, 1300, 1258, 1187, 1031, 1005, 754 cm<sup>-1</sup>.

HRMS (FAB<sup>+</sup>, *m/z*): [M]<sup>+</sup> calcd for C<sub>14</sub>H<sub>13</sub>F<sub>2</sub>IO<sub>2</sub><sup>+</sup>, 377.9928; found, 377.9954.

2-[2,2-Difluoro-3-iodo-1-(4-methoxyphenyl)prop-1-yl]thiophene (**8af**)

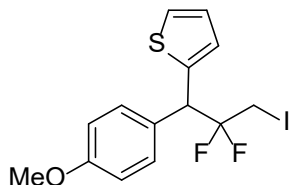

Instead of 1.0 mmol of phenol, 0.2525 g (3.0 mmol) of thiophene and 0.1383g (2.0 mmol) of  $K_2CO_3$  was employed and the reaction was conducted at 30 °C for 6 h to afford 0.137 g of the title compound (0.347 mmol) in 69% yield.

Pale yellow oil.

R<sub>f</sub> = 0.55 (hexane:AcOEt = 4:1).

$^1H$  NMR ( $CDCl_3$ )  $\delta$  7.41-7.38 (2H, m), 7.24 (1H, d,  $J$  = 6.6 Hz), 7.08 (1H, d,  $J$  = 3.3 Hz), 6.98-6.95 (1H, m), 6.90-6.87 (2H, m), 4.96 (1H, dd,  $J$  = 17.1, 15.0 Hz), 3.80 (3H, s), 3.50-3.28 (2H, m) ppm.

$^{13}C$  NMR ( $CDCl_3$ )  $\delta$  159.3, 139.2 (d,  $J$  = 3.7 Hz), 130.3, 128.5 (d,  $J$  = 5.0 Hz), 127.2, 126.7, 125.4, 120.2 (t,  $J$  = 248.7 Hz), 114.1, 55.2, 50.8 (t,  $J$  = 24.1 Hz), 4.0 (t,  $J$  = 31.0 Hz) ppm.

$^{19}F$  NMR ( $CDCl_3$ )  $\delta$  -97.46 (1F, dq,  $J$  = 241.9, 14.8 Hz), -99.62 (1F, dtd,  $J$  = 241.7, 14.8 Hz) ppm.

IR ( $CHCl_3$ )  $\nu$  3010, 2838, 1611, 1513, 1254, 1217, 1181, 1002, 757, 467  $cm^{-1}$ .

HRMS (FAB<sup>+</sup>,  $m/z$ ):  $[M]^+$  calcd for  $C_{14}H_{13}F_2IOS^+$ , 393.9694; found, 393.9709.

2-[2,2-Difluoro-3-iodo-1-(4-methoxyphenyl)propyl]-4,5-dimethylphenol (**8ag**)

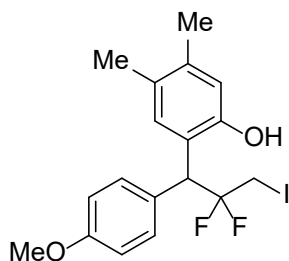

Instead of 1.0 mmol of phenol, 0.1223 g (1.0 mmol) of 3,4-dimethylphenol was employed to afford 0.165 g of the title compound (0.395 mmol) in 76% yield.

Pale yellow oil.

R<sub>f</sub> = 0.31 (hexane:AcOEt = 4:1).

$^1H$  NMR ( $CDCl_3$ )  $\delta$  7.37 (2H, d,  $J$  = 8.4 Hz), 7.25 (1H, s), 6.84 (2H, d,  $J$  = 8.4 Hz), 6.53 (1H, s), 5.13 (1H, t,  $J$  = 17.4 Hz), 4.84 (1H, br s), 3.77 (3H, s), 3.54-3.42 (2H, m), 2.18 (3H, s), 2.15 (3H, s) ppm.

$^{13}C$  NMR ( $CDCl_3$ )  $\delta$  158.6, 150.9, 136.9, 130.6, 130.2, 129.3 (d,  $J$  = 3.8 Hz), 128.9, 121.4 (d,  $J$  = 5.0 Hz), 121.0 (t,  $J$  = 247.2 Hz), 117.1, 113.9, 55.2, 46.4 (t,  $J$  = 23.6 Hz), 19.4, 19.1, 5.3 (t,  $J$  = 29.8 Hz) ppm.

$^{19}\text{F}$  NMR ( $\text{CDCl}_3$ )  $\delta$  -95.03 (1F, dtd,  $J = 241.8, 17.1, 11.4$  Hz), -97.81 (1F, dtd,  $J = 241.8, 18.2, 11.4$  Hz) ppm.

IR ( $\text{CHCl}_3$ )  $\nu$  3412, 2924, 1610, 1512, 1456, 1413, 1251, 1181, 1000, 758  $\text{cm}^{-1}$ .

HRMS (FAB $^+$ ,  $m/z$ ):  $[\text{M}]^+$  calcd for  $\text{C}_{18}\text{H}_{19}\text{F}_2\text{IO}_2^+$ , 432.0392; found, 432.0404.

#### 4-[3,3-Difluoro-4-iodo-2-(4-methoxyphenyl)but-2-yl]phenol (**8ja**)

Instead of 0.5 mmol of **1a**, 0.0991 g (0.5 mmol) of 1-(2,2-difluoro-1-methylcycloprop-1-yl)-4-methoxybenzene (**1j**) was employed to afford 0.148 g of the title compound (0.354 mmol) in 71% yield.

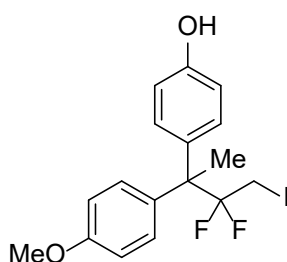

Colorless oil.

R<sub>f</sub> = 0.31 (hexane:AcOEt = 4:1).

$^1\text{H}$  NMR ( $\text{CDCl}_3$ )  $\delta$  7.22 (2H, d,  $J = 8.4$  Hz), 7.18 (2H, d,  $J = 9.0$  Hz), 6.82 (2H, d,  $J = 8.7$  Hz), 6.75 (2H, d,  $J = 8.7$  Hz), 4.90 (1H, br s), 3.81 (3H, s), 3.41 (2H, t,  $J = 16.8$  Hz), 1.80 (3H, s) ppm.

$^{13}\text{C}$  NMR ( $\text{CDCl}_3$ )  $\delta$  158.1, 154.4, 138.2, 135.5, 130.0, 129.7 (d,  $J = 6.8$  Hz), 122.0 (t,  $J = 251.5$  Hz), 114.9, 113.4, 55.2, 52.9 (t,  $J = 22.0$  Hz), 25.5 (t,  $J = 4.0$  Hz), 5.6 (t,  $J = 29.2$  Hz) ppm.

$^{19}\text{F}$  NMR ( $\text{CDCl}_3$ )  $\delta$  -95.70 (t,  $J = 16.0$  Hz) ppm.

IR ( $\text{CHCl}_3$ )  $\nu$  3400, 3008, 2838, 1611, 1513, 1182, 1027, 999, 832, 735  $\text{cm}^{-1}$ .

HRMS (FAB $^+$ ,  $m/z$ ):  $[\text{M}+\text{H}]^+$  calcd for  $\text{C}_{17}\text{H}_{18}\text{F}_2\text{IO}_2^+$ , 419.0314; found, 419.0321.

#### 4-{[1-(4-*tert*-Butylphenyl)-2,2-difluoro-3-iodo]prop-1-yl}phenol (**8fa**)

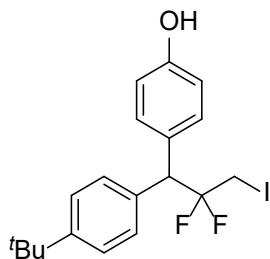

Instead of 0.5 mmol of **1a**, 0.1051 g (0.5 mmol) of 1-*tert*-butyl-4-(2,2-difluorocycloprop-1-yl)benzene (**1f**) was employed to afford 0.152 g of the title compound (0.352 mmol) in 70% yield.

Pale yellow solid.

m.p.: 70.0 - 71.0  $^{\circ}\text{C}$ .

R<sub>f</sub> = 0.40 (hexane:AcOEt = 4:1).

<sup>1</sup>H NMR (CDCl<sub>3</sub>) δ 7.35-7.30 (2H, m), 6.81-6.76 (2H, m), 4.74 (1H, br s), 4.62 (1H, t, *J* = 17.1 Hz), 3.41 (2H, t, *J* = 14.4 Hz), 1.29 (9H, s) ppm.

<sup>13</sup>C NMR (CDCl<sub>3</sub>) δ 154.5, 150.3, 134.1 (d, *J* = 2.5 Hz), 130.6, 129.5 (d, *J* = 2.5 Hz), 128.8, 125.6, 120.8 (t, *J* = 247.5 Hz), 115.5, 54.8 (t, *J* = 23.5 Hz), 34.4, 31.2, 4.9 (t, *J* = 31.0 Hz) ppm.

<sup>19</sup>F NMR (CDCl<sub>3</sub>) δ -96.40 – 98.38 (m) ppm.

IR (CHCl<sub>3</sub>) ν 3248, 2965, 2245, 1889, 1560, 1513, 1249, 1000, 819, 733 cm<sup>-1</sup>.

HRMS (FAB<sup>+</sup>, *m/z*): [M+H]<sup>+</sup> calcd for C<sub>19</sub>H<sub>21</sub>F<sub>2</sub>IO<sup>+</sup>, 430.0600; found, 430.0586.

#### (2,2-Difluoro-1,3-diiiodoprop-1-yl)benzene (**3g**)

Instead of 0.5 mmol of **1a**, 0.1051 g (0.5 mmol) of (2,2-difluorocycloprop-1-yl)benzene (**1g**) was employed to afford the byproduct **3g** (0.230 mmol) in 46% in <sup>19</sup>F NMR yield with the substrate **1g**.

Data for the crude product were included, because it was difficult to isolate from the byproducts.

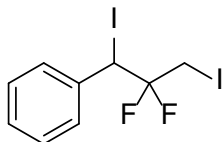

Brown oil.

R<sub>f</sub> = 0.80 (hexane:AcOEt = 4:1).

<sup>1</sup>H NMR (CDCl<sub>3</sub>) δ 7.55-7.48 (2H, m), 7.36-7.31 (3H, m), 5.55 (1H, dd, *J* = 19.8, 7.8 Hz), 3.56-3.27 (m, 2H) ppm.

<sup>13</sup>C NMR (CDCl<sub>3</sub>) δ 136.7 (d, *J* = 5.6 Hz), 129.3, 129.1, 129.0, 118.0 (t, *J* = 247.5 Hz), 27.6 (dd, *J* = 27.9, 24.8 Hz), 0.6 (t, *J* = 31.6 Hz) ppm.

<sup>19</sup>F NMR (CDCl<sub>3</sub>) δ -87.67 ~ -87.80 (1F, m), -88.50 ~ -88.64 (1F, m) ppm.

HRMS (FAB<sup>+</sup>, *m/z*): [M+H]<sup>+</sup> calcd for C<sub>9</sub>H<sub>8</sub>F<sub>2</sub>I<sub>2</sub><sup>+</sup>, 407.8678; found, 407.8680.

#### 1-Bromo-4-(2,2-difluoro-1,3-diiiodoprop-1-yl)benzene (**3h**)

Instead of 0.5 mmol of **1a**, 0.1051 g (0.5 mmol) of 1-bromo-4-(2,2-difluorocycloprop-1-yl)benzene (**1h**) was employed to afford the byproduct **3h** (0.252 mmol) in 50% in <sup>19</sup>F NMR yield with other byproducts.

Data for the crude product were included, because it was difficult to isolate from the byproducts.

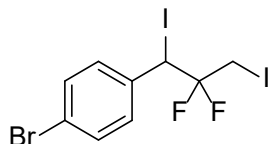

Colorless oil.

R<sub>f</sub> = 0.63 (hexane:AcOEt = 4:1).



$^1\text{H}$  NMR ( $\text{CDCl}_3$ )  $\delta$  7.50-7.46 (2H, m), 7.41-7.38 (2H, m), 5.52 (1H, dd,  $J = 18.9, 8.4$  Hz), 3.58-3.27 (2H, m) ppm.

$^{13}\text{C}$  NMR ( $\text{CDCl}_3$ )  $\delta$  135.6, 132.1, 130.6, 123.3, 117.9 (t,  $J = 247.1$  Hz), 26.4 (t,  $J = 27.3$  Hz), 0.6 (t,  $J = 31.6$  Hz) ppm.

$^{19}\text{F}$  NMR ( $\text{CDCl}_3$ )  $\delta$  -88.68 ~ -89.74 (1F, m), -94.51 ~ -95.50 (1F, m) ppm.

HRMS (FAB+, m/z):  $[\text{M}+\text{H}]^+$  calcd for  $\text{C}_9\text{H}_8\text{BrF}_2\text{I}_2\text{O}^+$ , 486.7861; found, 486.7888.

### Control experiment

2,2-Difluoro-1-(4-methoxyphenyl)-3-[(2,2,6,6-tetramethylpiperidin-1-yl)oxy]propan-1-ol

(Scheme 5 (eq. 4), **2a-TEMPO**)

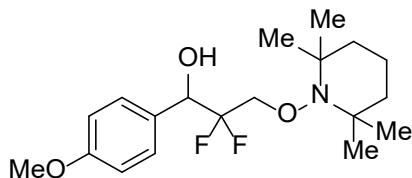

To a mixture of 0.0920 g (0.50 mmol) of 1-(2,2-difluorocycloprop-1-yl)-4-methoxybenzene (**1a**) and 0.1716 g (1.10 mmol) of 2,2,6,6-tetramethylpiperidine 1-oxyl radical in 0.75 mL of 1,2-dichloroethane and 0.75 mL of water in a pressure tight glass tube, 0.1400 g (0.55 mmol) of iodine was added and stirred for 18 h at 25 °C. The reaction mixture was extracted with CH<sub>2</sub>Cl<sub>2</sub> three times. After dried over anhydrous Na<sub>2</sub>SO<sub>4</sub>, the crude product was evaporated and purified by silica gel column chromatography by hexane/AcOEt = 20:1-10:1 as an eluent to yield 0.462 g (0.160 mmol) of the title compound as a colorless oil in 32% yield.

White solid.

m.p.: 92.5 - 93.5 °C.

R<sub>f</sub> = 0.49 (hexane:AcOEt = 4:1).

<sup>1</sup>H NMR (CDCl<sub>3</sub>) δ 7.42-7.39 (2H, m), 7.18 (1H, br s), 6.92-6.87 (2H, m), 5.01 (1H, dd, *J* = 24.3, 2.3 Hz), 3.80 (3H, s), 3.35-3.10 (2H, m), 1.70-1.07 (18H, m) ppm.

<sup>13</sup>C NMR (CDCl<sub>3</sub>) δ 159.4, 129.2, 128.4, 118.4 (dd, *J* = 256.8, 240.6 Hz), 113.1, 75.5 (dd, *J* = 29.8, 25.4 Hz), 56.7-55.8 (m), 55.1, 50.9 (dd, *J* = 35.3, 27.8 Hz), 40.7, 33.1, 21.1, 20.6, 17.2 ppm.

<sup>19</sup>F NMR (CDCl<sub>3</sub>) δ -100.91 ~ -101.83 (1F, m), -106.50 ~ -107.67 (1F, m) ppm.

IR (KBr) ν 3630, 3224, 2929, 1887, 1612, 1514, 1466, 1249, 984, 817 cm<sup>-1</sup>.

HRMS (FAB<sup>-</sup>, *m/z*): [M-H]<sup>-</sup> calcd for C<sub>19</sub>H<sub>28</sub>F<sub>2</sub>NO<sub>3</sub><sup>-</sup>, 356.2043; found, 356.2062.

2,2-Difluoro-3-iodo-1-(4-methoxyphenyl)propan-1-ol (Scheme 5 (eq. 5), **2a**)

A mixture of 0.0459 g (0.25 mmol) of 1-(2,2-difluorocycloprop-1-yl)-4-methoxybenzene, 0.0986 g (0.55 mmol) of 1,1-diphenylethene, 0.0698 g (0.275 mmol) of I<sub>2</sub> in 0.75 mL of MeCN and 0.75 mL of water in a pressure tight glass tube was stirred at 80 °C (oil bath temperature) for 18 h, and the reaction mixture was extracted with CH<sub>2</sub>Cl<sub>2</sub> three times. After dried over anhydrous Na<sub>2</sub>SO<sub>4</sub>, the crude product was evaporated and purified by silica gel column chromatography by hexane:AcOEt = 20:1-10:1 as an eluent to yield 0.0487 g (0.11 mmol) of 2,2-difluoro-3-iodo-1-(4-methoxyphenyl)-propan-1-ol as a colorless oil in 44% yield.

(Scheme 5 (eq. 6), **2a**)

A mixture of 0.0457 g (0.25 mmol) of 1-(2,2-difluorocycloprop-1-yl)-4-methoxybenzene, 0.0626 g (0.275 mmol) of *N*-iodosuccinimide in 0.75 mL of MeCN and 0.75 mL of water in a pressure tight glass tube was stirred at 80 °C (oil bath temperature) for 18 h, and the reaction mixture was extracted with CH<sub>2</sub>Cl<sub>2</sub> three times. After dried over anhydrous Na<sub>2</sub>SO<sub>4</sub>, the crude product was evaporated and purified by silica gel column chromatography by hexane:AcOEt = 20:1-10:1 as an eluent to yield 0.0508 g (0.12 mmol) of 2,2-difluoro-3-iodo-1-(4-methoxyphenyl)-propan-1-ol as a colorless oil in 46% yield.

1-{(1-Benzylsulfenyl-2,2-difluoro-3-iodo)but-1-yl}-4-methoxybenzene (**7sa**)

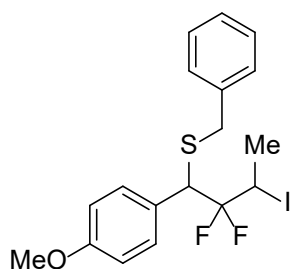

Instead of 0.5 mmol of **1a**, 0.0992 g (0.5 mmol) of 1-(2,2-difluoro-3-methylcycloprop-1-yl)-4-methoxybenzene (**1s**, *d.r.* = 77:23) was employed to afford 0.1149 g of the title compound (0.256 mmol) in 51% yield as a diastereomer mixture.

diastereomer ratio = 55:45.

Pale yellow oil.

R<sub>f</sub> = 0.46 (hexane:AcOEt = 10:1).

<sup>1</sup>H NMR (CDCl<sub>3</sub>) δ 7.35-7.22 (14H, m), 6.91-6.82 (4H, m), 4.49-4.33 (1H, m), 4.34 (1H, d, *J* = 10.4 Hz), 4.29 (1H, d, *J* = 10.4 Hz), 4.08-3.91 (1H, m), 3.82 (3H, s), 3.81 (3H, s), 3.86-3.73 (m, 2H), 3.56 (1H, d, *J* = 9.5 Hz), 3.52 (1H, d, *J* = 9.5 Hz), 1.85 (3H, d, *J* = 7.2 Hz), 1.79 (3H, d, *J* = 7.2 Hz) ppm.

<sup>13</sup>C NMR (CDCl<sub>3</sub>) δ 159.5 and 159.4, 137.1 and 136.8, 130.64 and 130.58, 129.3 and 129.2, 128.5 (C\*2), 127.3 (C\*2), 126.83 and 126.77, 121.4 (t, *J* = 249.4 Hz, C\*2), 113.94 and 113.88, 55.2 (C\*2), 51.2 (t, *J* = 25.4 Hz) and 51.0 (t, *J* = 24.7 Hz), 36.2 (d, *J* = 1.9 Hz) and 36.0 (s), 23.1 (t, *J* = 27.9 Hz) and 22.7 (t, *J* = 27.9 Hz), 21.2 (t, *J* = 3.8 Hz) and 21.0 (t, *J* = 3.7 Hz) ppm.

<sup>19</sup>F NMR (CDCl<sub>3</sub>) δ -100.45 (minor 1F, dt, *J* = 243.9, 13.6 Hz) and -103.09 (major 1F, ddd, *J* = 244.2, 16.1, 9.3 Hz), -107.63 ~ -108.67 (2F, m) ppm.

IR (CHCl<sub>3</sub>) ν 3009, 2958, 2936, 2839, 1611, 1512, 1454, 1253, 1179, 1035 cm<sup>-1</sup>.

HRMS (FAB<sup>+</sup>, *m/z*): [M]<sup>+</sup> calcd for C<sub>18</sub>H<sub>19</sub>F<sub>2</sub>IOS<sup>+</sup>, 448.0164; found, 448.0177.

### Transformation of the ring-opening products

#### 3,3-Difluoro-2-(4-methoxyphenyl)oxetane (**9a**) [1777805-21-6]<sup>11</sup>

A mixture of 0.1643 g (0.50 mmol) of **2a** and 0.2076 g (1.50 mmol) of K<sub>2</sub>CO<sub>3</sub> in 1.0 mL of DMF in a 30 mL round-bottomed flask was stirred at 90 °C for 4 h, and the reaction mixture was quenched by water. The resultant mixture was then extracted with hexane:AcOEt (v:v=4:1) three times and successively washed by brine. After drying over anhydrous Na<sub>2</sub>SO<sub>4</sub> and concentration, the crude product was purified by silica gel column chromatography to furnish 0.088 g (0.44 mmol, yield 88%) of the title compound as a colorless oil.

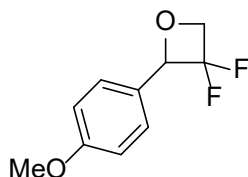

<sup>1</sup>H NMR (CDCl<sub>3</sub>) δ 7.37-7.33 (2H, m), 6.98-6.93 (2H, m), 5.80 (1H, t, *J* = 10.8 Hz), 4.99-4.77 (2H, m), 3.82 (3H, s) ppm.

<sup>13</sup>C NMR (CDCl<sub>3</sub>) δ 160.4, 128.5, 125.4 (d, *J* = 3.2 Hz), 117.8 (t, *J* = 281.0 Hz), 113.9, 91.5 (dd, *J* = 25.4, 23.5 Hz), 78.5 (t, *J* = 24.8 Hz), 55.2 ppm.

<sup>19</sup>F NMR (CDCl<sub>3</sub>) δ -112.93 (1F, ddt, *J* = 191.4, 15.8, 11.3 Hz), -100.04 (1F, dq, *J* = 192.4, 11.3 Hz) ppm.

#### 3,3-Difluoro-2-(4-methoxyphenyl)-2-methyloxetane (**9j**) [1777805-22-7]<sup>11</sup>

Instead of 0.5 mmol of **2a**, 0.1706 g (0.5 mmol) of 3,3-difluoro-4-iodo-2-(4-methoxyphenyl)butan-2-ol (**2j**) was employed to afford 0.0944 g of the title compound (0.44 mmol) in 88% yield as a colorless oil.

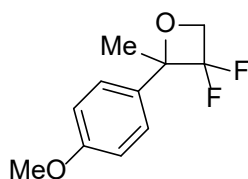

<sup>1</sup>H NMR (CDCl<sub>3</sub>) δ 7.35-7.31 (2H, m), 6.96-6.91 (2H, m), 4.87-4.65 (2H, m), 3.83 (3H, s), 1.74 (3H, d, *J* = 2.1 Hz) ppm.

<sup>13</sup>C NMR (CDCl<sub>3</sub>) δ 159.4, 131.0, 126.2, 118.4 (t, *J* = 282.9 Hz), 113.7, 95.0 (t, *J* = 22.9 Hz), 76.3 (t, *J* = 26.0 Hz), 55.1, 23.0 (d, *J* = 5.6 Hz) ppm.

<sup>19</sup>F NMR (CDCl<sub>3</sub>) δ -105.86 ~ -106.61 (1F, m), -111.02 ~ -111.77 (1F, m) ppm.

#### 2,2-Difluoro-1-(4-methoxyphenyl)propane-1,3-diol (**10a**)

A mixture of 0.0405 g (0.30 mmol) of **9a** and 0.0040 g (0.02 mmol) of *p*-TsOH·H<sub>2</sub>O in 1.0 mL of

water in a 10 mL round-bottom flask was stirred at 50 °C for 24 h, and the reaction mixture was extracted with CH<sub>2</sub>Cl<sub>2</sub> three times and washed by sat. Na<sub>2</sub>S<sub>2</sub>O<sub>3</sub> aq. and brine. After drying over anhydrous Na<sub>2</sub>SO<sub>4</sub> and concentration, the crude product was purified by silica gel column chromatography yielded 0.0367 g (0.168 mmol, yield 84%) of the title compound as a white solid.

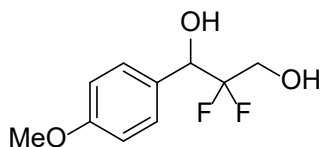

White solid.

m.p.: 71.0 - 72.4 °C.

R<sub>f</sub> = 0.36 (hexane:AcOEt = 1:1).

<sup>1</sup>H NMR (CDCl<sub>3</sub>) δ 7.39-7.36 (2H, m), 6.94-6.89 (2H, m), 5.00 (1H, ddd, *J* = 13.2, 8.7, 3.9 Hz), 3.97-3.72 (2H, m), 3.82 (3H, s), 2.77 (1H, br s), 2.25 (1H, br s) ppm.

<sup>13</sup>C NMR (CDCl<sub>3</sub>) δ 159.9, 128.7, 128.0, 120.4 (dd, *J* = 248.7, 246.2 Hz), 113.9, 73.0 (t, *J* = 26.0 Hz), 62.1 (t, *J* = 31.0 Hz), 55.3 ppm.

<sup>19</sup>F NMR (CDCl<sub>3</sub>) δ -104.01 (1F, ddt, *J* = 244.2, 24.9, 7.1 Hz), -105.93 (1F, dm, *J* = 245.1 Hz) ppm.

IR (CHCl<sub>3</sub>) ν 3609, 3411, 3020, 1613, 1514, 1252, 1216, 1070, 757, 500 cm<sup>-1</sup>.

HRMS (FAB<sup>-</sup>, *m/z*): [M-H]<sup>-</sup> calcd for C<sub>10</sub>H<sub>11</sub>F<sub>2</sub>O<sub>3</sub><sup>-</sup>, 217.0682; found, 217.0698.

#### 2,2-Difluoro-3-(4-methoxyphenyl)butan-1,3-diol (**10j**)

Instead of 0.2 mmol of **9a**, 0.0425 g (0.20 mmol) of 3,3-difluoro-2-(4-methoxyphenyl)-2-methyloxetane (**9j**) was employed to afford 0.0425 g of the title compound (0.18 mmol) in 92% yield as a white solid.

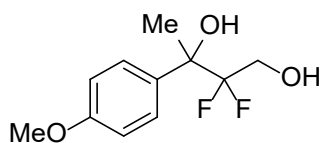

White solid.

m.p.: 84.0 - 85.0 °C.

R<sub>f</sub> = 0.48 (hexane:AcOEt = 1:1).

<sup>1</sup>H NMR (CDCl<sub>3</sub>) δ 7.48-7.44 (2H, m), 6.92-6.87 (2H, m), 3.91-3.57 (2H, m), 3.81 (3H, s), 2.94 (1H, br s), 2.26 (1H, t, *J* = 6.8 Hz), 1.71-1.70 (3H, m) ppm.

<sup>13</sup>C NMR (CDCl<sub>3</sub>) δ 159.2, 132.8, 127.0, 120.6 (t, *J* = 251.9 Hz), 113.6, 76.6 (t, *J* = 26.1 Hz), 62.0 (dd, *J* = 31.0, 28.6 Hz), 55.2, 23.7 (t, *J* = 2.8 Hz) ppm.

<sup>19</sup>F NMR (CDCl<sub>3</sub>) δ -118.74 (1F, dt, *J* = 255.5, 11.6 Hz), -122.89 (1F, dt, *J* = 255.5, 15.8 Hz) ppm

IR (CHCl<sub>3</sub>) ν 3452, 3369, 1615, 1512, 1460, 1303, 1215, 1023, 917, 756, 500 cm<sup>-1</sup>.

HRMS (FAB<sup>-</sup>, *m/z*): [M-H]<sup>-</sup> calcd for C<sub>11</sub>H<sub>13</sub>F<sub>2</sub>O<sub>3</sub><sup>-</sup>, 231.0838; found, 231.0811.

3-[2,2-Difluoro-3-iodo-1-(4-methoxyphenyl)prop-1-yl]pentan-2,4-dione (**11**)

A mixture of 0.0686 g (0.20 mmol) of 1-(2,2-difluoro-3-iodo-1-methoxyprop-1-yl)-4-methoxybenzene (**5aa**), 0.0200 g (0.20 mmol) of acetylacetone and 0.0108 g (0.04 mmol) of  $\text{FeCl}_3 \cdot 6\text{H}_2\text{O}$  in 1.0 mL of 1,2-dichloroethane in a pressure tight glass tube was stirred 80 °C for 24 h, and the reaction mixture was quenched by sat.  $\text{NaHCO}_3$  aq. The resultant mixture was then extracted with  $\text{CH}_2\text{Cl}_2$  three times and washed by sat.  $\text{Na}_2\text{S}_2\text{O}_3$  aq. After drying over anhydrous  $\text{Na}_2\text{SO}_4$  and concentration, the crude product was purified by recrystallization yielded 0.0607 g (0.148 mmol, yield 74%) of 3-[2,2-difluoro-3-iodo-1-(4-methoxyphenyl)propyl]pentan-2,4-dione (**11**) as white solid.

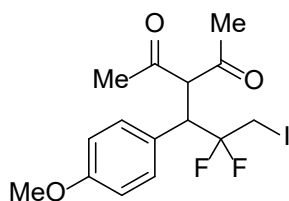

White solid.

m.p.: 118.1 - 121.3 °C.

R<sub>f</sub> = 0.19 (hexane:AcOEt = 4:1).

$^1\text{H}$  NMR ( $\text{CDCl}_3$ )  $\delta$  7.27-7.23 (2H, m), 6.88-6.83 (2H, m), 4.61 (1H, d,  $J$  = 11.4 Hz), 4.41 (1H, ddd,  $J$  = 25.8, 11.4, 1.2 Hz), 3.79 (3H, s), 3.27-3.01 (2H, m), 2.33 (3H, s), 1.84 (3H, s) ppm.

$^{13}\text{C}$  NMR ( $\text{CDCl}_3$ )  $\delta$  201.5 (d,  $J$  = 1.2 Hz), 201.1, 159.7, 130.6, 125.5 (d,  $J$  = 8.0 Hz), 121.1 (dd,  $J$  = 248.7, 248.1 Hz), 114.5, 69.0, 55.2, 49.0 (dd,  $J$  = 22.3, 21.1 Hz), 29.7 (d,  $J$  = 3.7 Hz), 28.7, 3.1 (dd,  $J$  = 31.0, 29.8 Hz) ppm.

$^{19}\text{F}$  NMR ( $\text{CDCl}_3$ )  $\delta$  -92.25 ~ -93.24 (1F, m), -103.73 ~ -104.72 (1F, m) ppm.

IR (KBr)  $\nu$  3025, 2937, 2844, 1741, 1704, 1517, 1360, 1267, 1170, 999  $\text{cm}^{-1}$ .

HRMS (FAB<sup>+</sup>,  $m/z$ ):  $[\text{M}]^+$  calcd for  $\text{C}_{15}\text{H}_{17}\text{F}_2\text{IO}_3^+$ , 410.0185; found, 410.0155.

1-[3,3-Difluoro-4-(4-methoxyphenyl)-6-methyl-3,4-dihydro-2H-pyran-5-yl]ethan-1-one (**12**)

A mixture of 0.124 g (0.30 mmol) of **11** and 0.124 g (0.90 mmol) of  $\text{K}_2\text{CO}_3$  in 6.5 mL of DMF in a 30 mL round-bottom flask was stirred at 90 °C for 4 h, and the reaction mixture was quenched by water. The resultant mixture was then extracted with  $\text{CH}_2\text{Cl}_2$  three times and successively washed by sat.  $\text{Na}_2\text{S}_2\text{O}_3$  aq. and brine. After drying over anhydrous  $\text{Na}_2\text{SO}_4$  and concentration, the crude product was purified by silica gel column chromatography yielded 0.069 g (0.246 mmol, yield 82%) of 1-[3,3-difluoro-4-(4-methoxyphenyl)-6-methyl-3,4-dihydro-2H-pyran-5-yl]ethan-1-one (**12**) as a white solid.

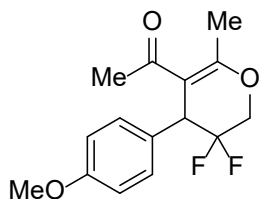

White solid.

m.p.: 93.2 - 94.5 °C.

R<sub>f</sub> = 0.25 (hexane:AcOEt = 4:1).

<sup>1</sup>H NMR (CDCl<sub>3</sub>) δ 7.17 (2H, d, *J* = 8.4 Hz), 6.88 (2H, d, *J* = 8.4 Hz), 4.19-4.13 (1H, m), 4.06-3.85 (2H, m), 3.80 (3H, s), 2.35 (3H, s), 2.01 (3H, s) ppm.

<sup>13</sup>C NMR (CDCl<sub>3</sub>) δ 197.8, 163.9, 159.4, 130.5, 128.5 (dd, *J* = 7.3, 2.5 Hz), 117.4 (t, *J* = 245.6 Hz), 114.1, 110.0 (dd, *J* = 4.4, 1.3 Hz), 63.3 (dd, *J* = 38.1, 27.2 Hz), 55.2, 46.3 (dd, *J* = 25.3, 12.1 Hz), 29.2, 20.2 ppm.

<sup>19</sup>F NMR (CDCl<sub>3</sub>) δ -103.88 (1F, dm, *J* = 246.2 Hz), -116.23 (1F, d, *J* = 246.2 Hz) ppm.

IR (KBr) ν 3001, 2959, 2933, 2838, 1676, 1581, 1512, 1279, 1076, 960 cm<sup>-1</sup>.

HRMS (FAB<sup>+</sup>, *m/z*): [M]<sup>+</sup> calcd for C<sub>15</sub>H<sub>16</sub>F<sub>2</sub>O<sub>3</sub>, 282.1062; found, 282.1060.

### 3,3-Difluoro-2-(4-methoxyphenyl)thietane (**13**)

A mixture of 1.291 g (3.00 mmol) of Methyl 3-{1-[2,2-difluoro-3-iodo-1-(4-methoxyphenyl)prop-1-yl]sulfenyl}-propanoate (**7af**) and 0.90 mL (6.00 mmol) of DBU in 6 mL of toluene in a 50 mL round-bottom flask was stirred at 120 °C (oil bath temperature) for 1 h, and the reaction mixture was quenched by water. The resultant mixture was then extracted with AcOEt three times. After drying over anhydrous Na<sub>2</sub>SO<sub>4</sub> and concentration, the crude product was purified by silica gel column chromatography yielded 0.575 g (2.66 mmol, yield 89%) of 3,3-difluoro-2-(4-methoxyphenyl)thietane (**13**) as a colorless oil.

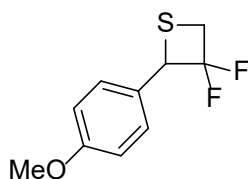

R<sub>f</sub> = 0.38 (hexane:AcOEt = 10:1).

<sup>1</sup>H NMR (CDCl<sub>3</sub>) δ 7.40 (2H, d, *J* = 8.4 Hz), 6.94-6.89 (2H, m), 5.14 (1H, t, *J* = 12.6 Hz), 3.81 (3H, s), 3.76 (1H, dt, *J* = 15.9, 10.8 Hz), 3.59 (1H, dddd, *J* = 16.8, 10.8, 6.3, 2.1 Hz) ppm.

<sup>13</sup>C NMR (CDCl<sub>3</sub>) δ 160.0, 130.5, 125.1, 119.4 (dd, *J* = 283.5, 275.4 Hz), 113.8, 57.6 (t, *J* = 26.7 Hz), 55.2, 37.0 (t, *J* = 27.9 Hz) ppm.

$^{19}\text{F}$  NMR ( $\text{CDCl}_3$ )  $\delta$  -70.88 (1F, dddd,  $J$  = 186.8, 13.8, 11.6, 6.8 Hz), -102.32 (1F, dtd,  $J$  = 186.8, 16.1, 11.6 Hz) ppm.

IR ( $\text{CHCl}_3$ )  $\nu$  3010, 2958, 2935, 2839, 1611, 1514, 1254, 1177, 1034, 990  $\text{cm}^{-1}$ .

HRMS (FAB $^+$ ,  $m/z$ ):  $[\text{M}]^+$  calcd. for  $\text{C}_{10}\text{H}_{10}\text{F}_2\text{OS}^+$ , 216.0415; found, 216.0440.

### 3,3-Difluoro-4-(4-methoxyphenyl)-6,7-dimethylchromane (**14**)

A mixture of 0.173 g (0.40 mmol) of 2-(2,2-difluoro-3-iodo-1-(4-methoxyphenyl)propyl)-4,5-dimethylphenol (**8ag**) and 0.166 g (1.20 mmol) of  $\text{K}_2\text{CO}_3$  in 1.0 mL of DMF in a 30mL round-bottom flask was stirred at 30  $^\circ\text{C}$  for 16 h, and the reaction mixture was quenched by water, then extracted with hexane:AcOEt (v:v=1:1) three times and washed by brine. After drying over anhydrous  $\text{Na}_2\text{SO}_4$  and concentration, the crude product was purified by silica gel column chromatography yielded 0.071 g (0.231 mmol, yield 58%) of 3,3-difluoro-4-(4-methoxyphenyl)-6,7-dimethylchromane (**15**) as a white solid.

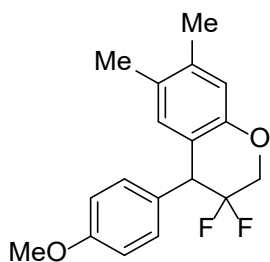

White solid.

m.p.: 103.5 - 104.5  $^\circ\text{C}$ .

R<sub>f</sub> = 0.62 (hexane:AcOEt = 4:1).

$^1\text{H}$  NMR ( $\text{CDCl}_3$ )  $\delta$  7.11-7.09 (2H, m), 6.89-6.84 (2H, m), 6.77 (1H, s), 6.63 (1H, s), 4.39 (1H, t,  $J$  = 13.2 Hz), 4.23-4.01 (2H, m), 3.80 (3H, s), 2.22 (3H, s), 2.09 (3H, s) ppm.

$^{13}\text{C}$  NMR ( $\text{CDCl}_3$ )  $\delta$  159.2, 150.7, 131.5, 130.9, 130.2, 129.1 (d,  $J$  = 1.9 Hz), 129.0 (d,  $J$  = 1.9 Hz), 118.4 (t,  $J$  = 3.4 Hz), 117.4, 117.3 (t,  $J$  = 245.9 Hz), 113.7, 73.0 (t,  $J$  = 26.0 Hz), 62.1 (t,  $J$  = 31.0 Hz), 55.3 ppm.

$^{19}\text{F}$  NMR ( $\text{CDCl}_3$ )  $\delta$  -104.01 (1F, ddt,  $J$  = 244.2, 24.9, 7.1 Hz), -105.93 (1F, dm,  $J$  = 245.1 Hz) ppm.

IR ( $\text{CHCl}_3$ )  $\nu$  2939, 2842, 1894, 1612, 1511, 1458, 1301, 1104, 866, 757  $\text{cm}^{-1}$ .

HRMS (FAB $^+$ ,  $m/z$ ):  $[\text{M}+\text{H}]^+$  calcd for  $\text{C}_{18}\text{H}_{19}\text{F}_2\text{O}_2^+$ , 305.1348; found, 305.1350.



### *X-Ray Crystallographic Data for the Compound 2s.*

Table S1. Crystal data and structure refinement for the compound **2s**.

|                                   |                                                         |                                         |
|-----------------------------------|---------------------------------------------------------|-----------------------------------------|
| Identification code               | <b>2s</b>                                               |                                         |
| Empirical formula                 | C11 H13 F2 I O2                                         |                                         |
| Formula weight                    | 342.11                                                  |                                         |
| Temperature                       | 173(2) K                                                |                                         |
| Wavelength                        | 0.71073 Å                                               |                                         |
| Crystal system                    | Monoclinic                                              |                                         |
| Space group                       | Pn                                                      |                                         |
| Unit cell dimensions              | a = 8.0439(15) Å<br>b = 6.9280(13) Å<br>c = 11.632(3) Å | a = 90°.<br>b = 100.98(2)°.<br>g = 90°. |
| Volume                            | 636.4(2) Å <sup>3</sup>                                 |                                         |
| Z                                 | 2                                                       |                                         |
| Density (calculated)              | 1.785 Mg/m <sup>3</sup>                                 |                                         |
| Absorption coefficient            | 2.525 mm <sup>-1</sup>                                  |                                         |
| F(000)                            | 332                                                     |                                         |
| Crystal size                      | 0.250 x 0.250 x 0.230 mm <sup>3</sup>                   |                                         |
| Theta range for data collection   | 2.843 to 25.470°.                                       |                                         |
| Index ranges                      | -7<=h<=9, -8<=k<=8, -11<=l<=14                          |                                         |
| Reflections collected             | 2098                                                    |                                         |
| Independent reflections           | 1346 [R(int) = 0.0265]                                  |                                         |
| Completeness to theta = 25.242°   | 100.0 %                                                 |                                         |
| Absorption correction             | Semi-empirical from equivalents                         |                                         |
| Max. and min. transmission        | 1.00000 and 0.14899                                     |                                         |
| Refinement method                 | Full-matrix least-squares on F <sup>2</sup>             |                                         |
| Data / restraints / parameters    | 1346 / 2 / 148                                          |                                         |
| Goodness-of-fit on F <sup>2</sup> | 1.084                                                   |                                         |
| Final R indices [I>2sigma(I)]     | R1 = 0.0510, wR2 = 0.1472                               |                                         |
| R indices (all data)              | R1 = 0.0568, wR2 = 0.1579                               |                                         |
| Absolute structure parameter      | -0.10(7)                                                |                                         |
| Extinction coefficient            | n/a                                                     |                                         |
| Largest diff. peak and hole       | 1.036 and -1.176 e.Å <sup>-3</sup>                      |                                         |

Table S2. Atomic coordinates ( $\times 10^4$ ) and equivalent isotropic displacement parameters ( $\text{\AA}^2 \times 10^3$ )

for the compound **2s**.  $U(\text{eq})$  is defined as one third of the trace of the orthogonalized  $U_{ij}$  tensor.

|       | x         | y        | z        | $U(\text{eq})$ |
|-------|-----------|----------|----------|----------------|
| C(1)  | 4760(20)  | 2449(18) | 4599(11) | 49(3)          |
| C(2)  | 4673(17)  | 680(18)  | 5164(12) | 60(3)          |
| C(3)  | 6028(18)  | -60(20)  | 5917(16) | 69(4)          |
| C(4)  | 7553(16)  | 944(19)  | 6165(11) | 52(3)          |
| C(5)  | 7688(18)  | 2690(20) | 5610(13) | 53(3)          |
| C(6)  | 6320(30)  | 3400(30) | 4894(17) | 53(4)          |
| C(7)  | 3270(30)  | 3230(20) | 3803(15) | 50(4)          |
| C(8)  | 2361(14)  | 4867(17) | 4258(10) | 50(3)          |
| C(9)  | 926(16)   | 5790(20) | 3411(11) | 57(3)          |
| C(10) | -460(20)  | 4360(20) | 2855(14) | 72(4)          |
| C(11) | 10415(19) | 1110(20) | 7283(14) | 67(4)          |
| O(1)  | 8835(12)  | 99(15)   | 6937(9)  | 62(2)          |
| O(2)  | 3666(13)  | 3935(13) | 2692(8)  | 58(2)          |
| F(1)  | 3512(10)  | 6244(11) | 4720(8)  | 64(2)          |
| F(2)  | 1784(10)  | 4118(12) | 5208(6)  | 62(2)          |
| I(1)  | -215(1)   | 8029(1)  | 4314(1)  | 78(1)          |

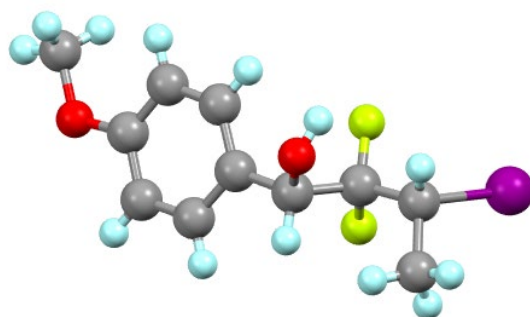

**2s**

Table S3. Bond lengths [ $\text{\AA}$ ] and angles [ $^\circ$ ] for the compound **2s**.

|                |           |
|----------------|-----------|
| C(1)-C(2)      | 1.399(18) |
| C(1)-C(6)      | 1.40(2)   |
| C(1)-C(7)      | 1.47(3)   |
| C(2)-C(3)      | 1.361(19) |
| C(2)-H(8)      | 0.9500    |
| C(3)-C(4)      | 1.391(18) |
| C(3)-H(9)      | 0.9500    |
| C(4)-O(1)      | 1.364(15) |
| C(4)-C(5)      | 1.39(2)   |
| C(5)-C(6)      | 1.34(3)   |
| C(5)-H(10)     | 0.9500    |
| C(6)-H(11)     | 0.9500    |
| C(7)-O(2)      | 1.47(2)   |
| C(7)-C(8)      | 1.50(2)   |
| C(7)-H(7)      | 1.0000    |
| C(8)-F(1)      | 1.366(13) |
| C(8)-F(2)      | 1.379(14) |
| C(8)-C(9)      | 1.511(18) |
| C(9)-C(10)     | 1.54(2)   |
| C(9)-I(1)      | 2.171(14) |
| C(9)-H(13)     | 1.0000    |
| C(10)-H(1)     | 0.9800    |
| C(10)-H(2)     | 0.9800    |
| C(10)-H(3)     | 0.9800    |
| C(11)-O(1)     | 1.439(17) |
| C(11)-H(4)     | 0.9800    |
| C(11)-H(5)     | 0.9800    |
| C(11)-H(6)     | 0.9800    |
| O(2)-H(12)     | 0.8400    |
| C(2)-C(1)-C(6) | 114.9(14) |
| C(2)-C(1)-C(7) | 120.7(13) |
| C(6)-C(1)-C(7) | 124.4(12) |
| C(3)-C(2)-C(1) | 121.7(13) |

|                  |           |
|------------------|-----------|
| C(3)-C(2)-H(8)   | 119.1     |
| C(1)-C(2)-H(8)   | 119.1     |
| C(2)-C(3)-C(4)   | 120.8(13) |
| C(2)-C(3)-H(9)   | 119.6     |
| C(4)-C(3)-H(9)   | 119.6     |
| O(1)-C(4)-C(5)   | 124.4(11) |
| O(1)-C(4)-C(3)   | 116.7(11) |
| C(5)-C(4)-C(3)   | 118.9(12) |
| C(6)-C(5)-C(4)   | 119.0(14) |
| C(6)-C(5)-H(10)  | 120.5     |
| C(4)-C(5)-H(10)  | 120.5     |
| C(5)-C(6)-C(1)   | 124.6(17) |
| C(5)-C(6)-H(11)  | 117.7     |
| C(1)-C(6)-H(11)  | 117.7     |
| O(2)-C(7)-C(1)   | 112.7(16) |
| O(2)-C(7)-C(8)   | 105.2(11) |
| C(1)-C(7)-C(8)   | 116.8(14) |
| O(2)-C(7)-H(7)   | 107.2     |
| C(1)-C(7)-H(7)   | 107.2     |
| C(8)-C(7)-H(7)   | 107.2     |
| F(1)-C(8)-F(2)   | 104.7(9)  |
| F(1)-C(8)-C(7)   | 109.1(12) |
| F(2)-C(8)-C(7)   | 105.1(11) |
| F(1)-C(8)-C(9)   | 109.6(10) |
| F(2)-C(8)-C(9)   | 110.5(9)  |
| C(7)-C(8)-C(9)   | 117.0(12) |
| C(8)-C(9)-C(10)  | 113.7(11) |
| C(8)-C(9)-I(1)   | 109.2(8)  |
| C(10)-C(9)-I(1)  | 109.0(9)  |
| C(8)-C(9)-H(13)  | 108.3     |
| C(10)-C(9)-H(13) | 108.3     |
| I(1)-C(9)-H(13)  | 108.3     |
| C(9)-C(10)-H(1)  | 109.5     |
| C(9)-C(10)-H(2)  | 109.5     |
| H(1)-C(10)-H(2)  | 109.5     |
| C(9)-C(10)-H(3)  | 109.5     |

|                 |           |
|-----------------|-----------|
| H(1)-C(10)-H(3) | 109.5     |
| H(2)-C(10)-H(3) | 109.5     |
| O(1)-C(11)-H(4) | 109.5     |
| O(1)-C(11)-H(5) | 109.5     |
| H(4)-C(11)-H(5) | 109.5     |
| O(1)-C(11)-H(6) | 109.5     |
| H(4)-C(11)-H(6) | 109.5     |
| H(5)-C(11)-H(6) | 109.5     |
| C(4)-O(1)-C(11) | 119.5(11) |
| C(7)-O(2)-H(12) | 109.5     |

---

Symmetry transformations used to generate equivalent atoms:

Table S4. Anisotropic displacement parameters ( $\text{\AA}^2 \times 10^3$ ) for the compound **2s**. The anisotropic

displacement factor exponent takes the form:  $-2p^2[ h^2 a^{*2}U^{11} + \dots + 2 h k a^* b^* U^{12} ]$

|       | U <sup>11</sup> | U <sup>22</sup> | U <sup>33</sup> | U <sup>23</sup> | U <sup>13</sup> | U <sup>12</sup> |
|-------|-----------------|-----------------|-----------------|-----------------|-----------------|-----------------|
| C(1)  | 43(6)           | 45(5)           | 60(8)           | -2(5)           | 17(7)           | -3(6)           |
| C(2)  | 41(6)           | 50(6)           | 77(8)           | 5(6)            | -14(6)          | -17(5)          |
| C(3)  | 52(8)           | 57(7)           | 93(10)          | 26(8)           | 3(8)            | -11(7)          |
| C(4)  | 41(6)           | 55(7)           | 59(6)           | 3(6)            | 8(5)            | -6(5)           |
| C(5)  | 39(6)           | 51(6)           | 75(8)           | 3(6)            | 22(6)           | -6(5)           |
| C(6)  | 40(10)          | 48(7)           | 71(10)          | -7(7)           | 12(8)           | -4(7)           |
| C(7)  | 43(10)          | 50(8)           | 54(9)           | 3(6)            | 4(8)            | 0(6)            |
| C(8)  | 39(6)           | 54(6)           | 56(6)           | 0(6)            | 8(5)            | -14(5)          |
| C(9)  | 42(6)           | 73(8)           | 59(6)           | 9(6)            | 15(5)           | 8(6)            |
| C(10) | 53(8)           | 79(9)           | 78(9)           | -14(8)          | -5(7)           | 15(7)           |
| C(11) | 41(7)           | 74(8)           | 79(8)           | 11(8)           | -9(6)           | -5(7)           |
| O(1)  | 43(5)           | 59(5)           | 77(6)           | 14(5)           | -1(4)           | -1(4)           |
| O(2)  | 69(6)           | 45(4)           | 65(5)           | 7(4)            | 23(5)           | 2(4)            |
| F(1)  | 44(4)           | 49(4)           | 97(5)           | -13(4)          | 7(4)            | -1(3)           |
| F(2)  | 54(4)           | 72(5)           | 62(4)           | 6(4)            | 17(4)           | 2(4)            |
| I(1)  | 49(1)           | 70(1)           | 112(1)          | -16(1)          | 11(1)           | 10(1)           |

Table S5. Hydrogen coordinates ( $\times 10^4$ ) and isotropic displacement parameters ( $\text{\AA}^2 \times 10^3$ ) for the compound **2s**.

|       | x     | y     | z    | U(eq) |
|-------|-------|-------|------|-------|
| H(8)  | 3641  | -24   | 5019 | 72    |
| H(9)  | 5930  | -1272 | 6278 | 83    |
| H(10) | 8732  | 3372  | 5736 | 64    |
| H(11) | 6422  | 4641  | 4562 | 63    |
| H(7)  | 2438  | 2152  | 3609 | 59    |
| H(13) | 1406  | 6412  | 2769 | 69    |
| H(1)  | 72    | 3201  | 2602 | 108   |
| H(2)  | -1181 | 4963  | 2177 | 108   |
| H(3)  | -1146 | 4001  | 3432 | 108   |
| H(4)  | 10969 | 1242  | 6606 | 101   |
| H(5)  | 11152 | 381   | 7901 | 101   |
| H(6)  | 10199 | 2393  | 7577 | 101   |
| H(12) | 3986  | 5090  | 2770 | 87    |

Table S6. Torsion angles [°] for the compound **2s**.

|                      |            |
|----------------------|------------|
| C(6)-C(1)-C(2)-C(3)  | -2(2)      |
| C(7)-C(1)-C(2)-C(3)  | -178.9(16) |
| C(1)-C(2)-C(3)-C(4)  | 1(3)       |
| C(2)-C(3)-C(4)-O(1)  | 179.5(15)  |
| C(2)-C(3)-C(4)-C(5)  | -2(2)      |
| O(1)-C(4)-C(5)-C(6)  | -178.1(15) |
| C(3)-C(4)-C(5)-C(6)  | 3(2)       |
| C(4)-C(5)-C(6)-C(1)  | -4(3)      |
| C(2)-C(1)-C(6)-C(5)  | 3(3)       |
| C(7)-C(1)-C(6)-C(5)  | -179.5(14) |
| C(2)-C(1)-C(7)-O(2)  | -133.3(13) |
| C(6)-C(1)-C(7)-O(2)  | 50(2)      |
| C(2)-C(1)-C(7)-C(8)  | 104.7(16)  |
| C(6)-C(1)-C(7)-C(8)  | -72(2)     |
| O(2)-C(7)-C(8)-F(1)  | -76.3(15)  |
| C(1)-C(7)-C(8)-F(1)  | 49.5(17)   |
| O(2)-C(7)-C(8)-F(2)  | 171.9(11)  |
| C(1)-C(7)-C(8)-F(2)  | -62.3(17)  |
| O(2)-C(7)-C(8)-C(9)  | 48.9(17)   |
| C(1)-C(7)-C(8)-C(9)  | 174.7(13)  |
| F(1)-C(8)-C(9)-C(10) | -179.1(11) |
| F(2)-C(8)-C(9)-C(10) | -64.2(14)  |
| C(7)-C(8)-C(9)-C(10) | 56.0(16)   |
| F(1)-C(8)-C(9)-I(1)  | -57.2(11)  |
| F(2)-C(8)-C(9)-I(1)  | 57.7(11)   |
| C(7)-C(8)-C(9)-I(1)  | 177.9(11)  |
| C(5)-C(4)-O(1)-C(11) | 5(2)       |
| C(3)-C(4)-O(1)-C(11) | -176.5(15) |

Symmetry transformations used to generate equivalent atoms:



## References

- 1) F. Wang, T. Luo, J.-B. Hu, Y. Wang, H. S. Krishnan, P. V. Jog, S. K. Ganesh, G. K. Surya Prakash, G. A. Olah, *Angew. Chem. Int. Ed.* **2011**, *50*, 7153-7157.
- 2) S. Dutt, R. Kumar, N. Banerjee, D. Saha, P. Banerjee, *Adv. Synth. Catal.* **2024**, *366*, 526-532.
- 3) P. Rullière, P. Cyr, A. B. Charette, *Org. Lett.* **2016**, *18*, 1988-1991.
- 4) P. S. Nosik, S. V. Ryabukhin, O. O. Grygorenko, D. M. Volochnyuk, *Adv. Synth. Catal.* **2018**, *360*, 4104-4114.
- 5) T. Goto, T. Kawasaki-Takasuka, T. Yamazaki, *J. Org. Chem.* **2019**, *84*, 9509-9518.
- 6) L. Li, F. Wang, C. Ni, J. Hu, *Angew. Chem. Int. Ed.* **2013**, *52*, 12390-12394.
- 7) D. Garayalde, E. Gómez-Bengoa, X.-G. Huang, A. Goeke, C. Nevado, *J. Am. Chem. Soc.* **2010**, *132*, 4720-4730.
- 8) T. D. Avery, D. Caiazza, J. A. Culbert, D. K. Taylor, E. R. T. Tiekink, *J. Org. Chem.* **2005**, *70*, 8344-8351.
- 9) T. Horibe, S. Ohmura, K. Ishihara, *J. Am. Chem. Soc.* **2019**, *141*, 1877-1881.
- 10) T. Yamazaki, T. Takasuka, T. Goto, N. Kondo, T. Shirai, JP2018-145175. (Tokyo University of Agriculture and Technology, Tosoh Finechem Corporation).
- 11) O. V. Fedorov, M. D. Kosobokov, V. V. Levin, M. I. Struchkova, A. D. Dilman, *J. Org. Chem.* **2015**, *80*, 5870-5876.

***NMR spectra of the substrates.***

<sup>1</sup>H and <sup>13</sup>C NMR spectra of 1-(2,2-difluoro-1-methylcycloprop-1-yl)-3-methoxybenzene (**1k**)

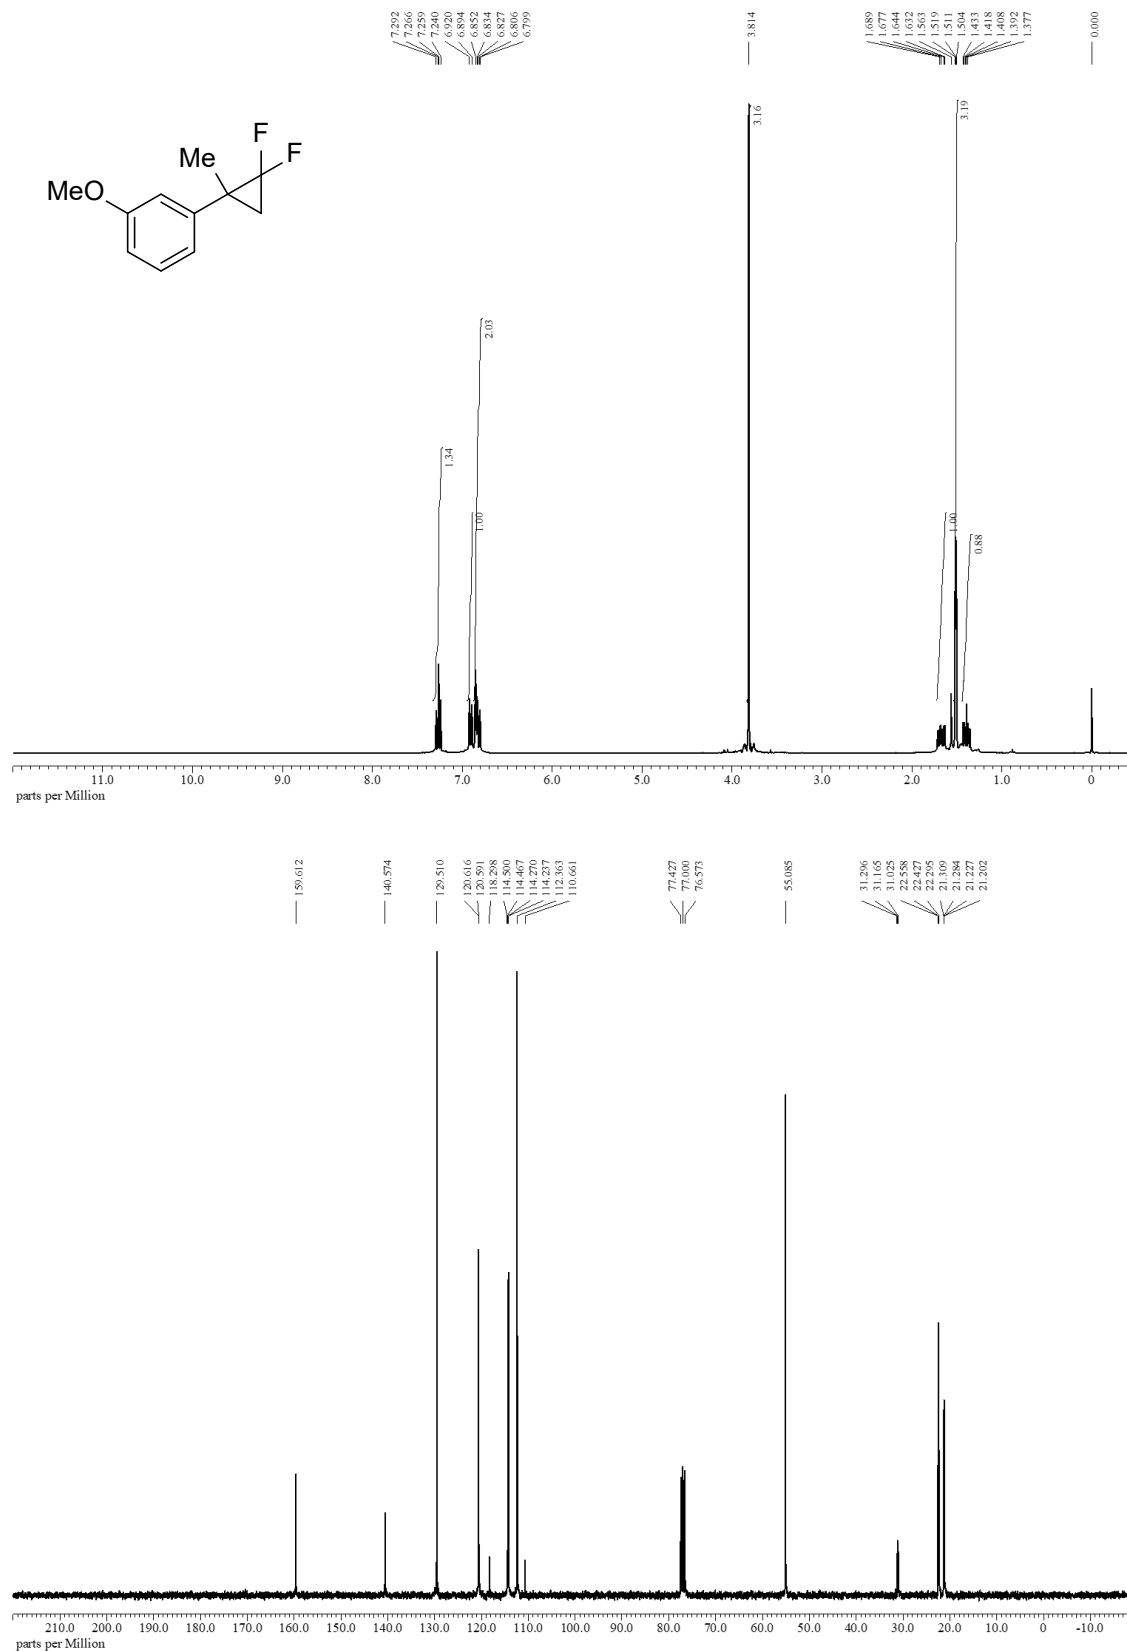

$^{19}\text{F}$  NMR spectrum of 1-(2,2-difluoro-1-methylcycloprop-1-yl)-3-methoxybenzene (**1k**)

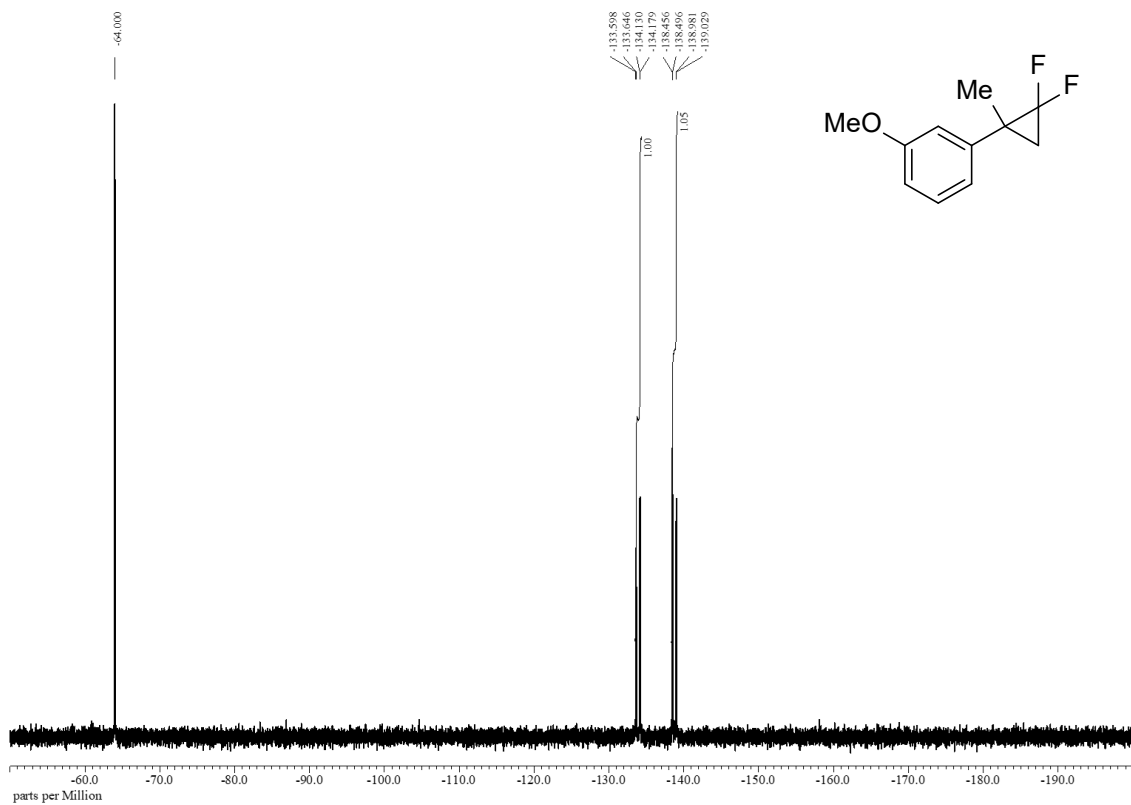

$^1\text{H}$  and  $^{13}\text{C}$  NMR spectra of 1-(2,2-difluoro-1-methylcycloprop-1-yl)-3,4,5-trimethoxybenzene (**1m**)

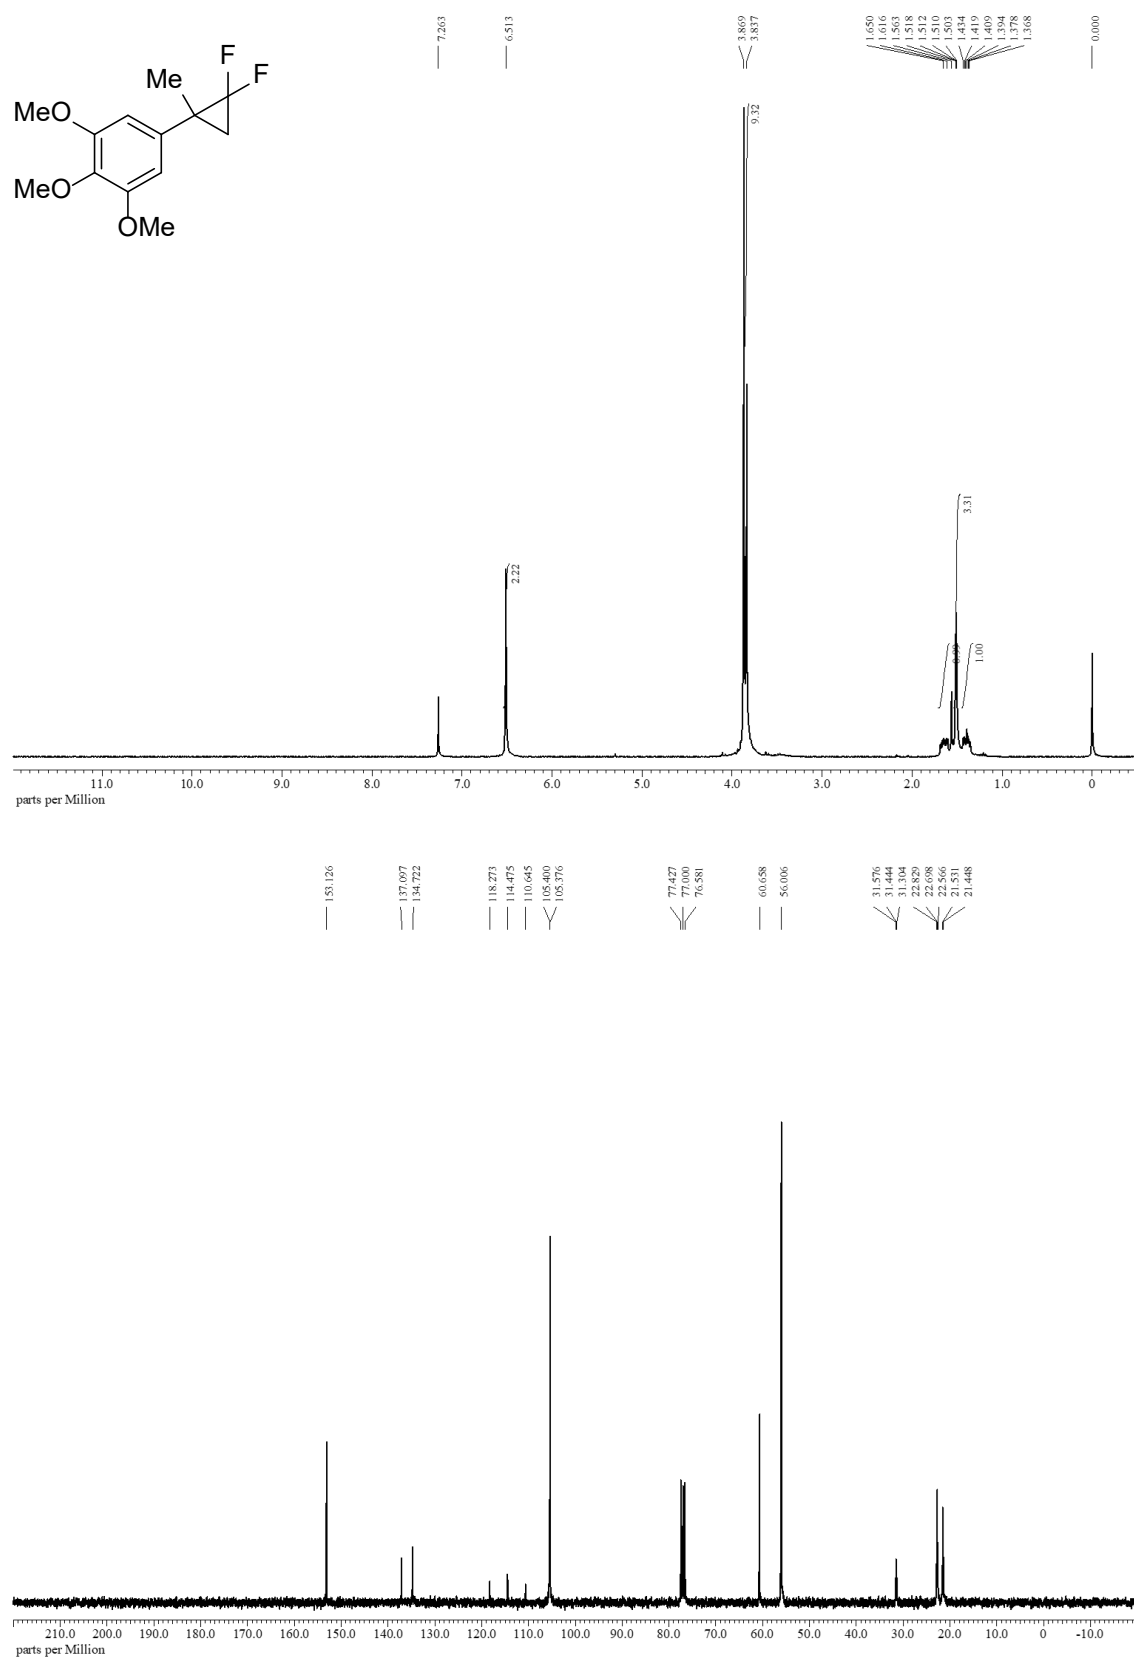

$^{19}\text{F}$  NMR spectrum of 1-(2,2-difluoro-1-methylcycloprop-1-yl)-3,4,5-trimethoxybenzene (**1m**)

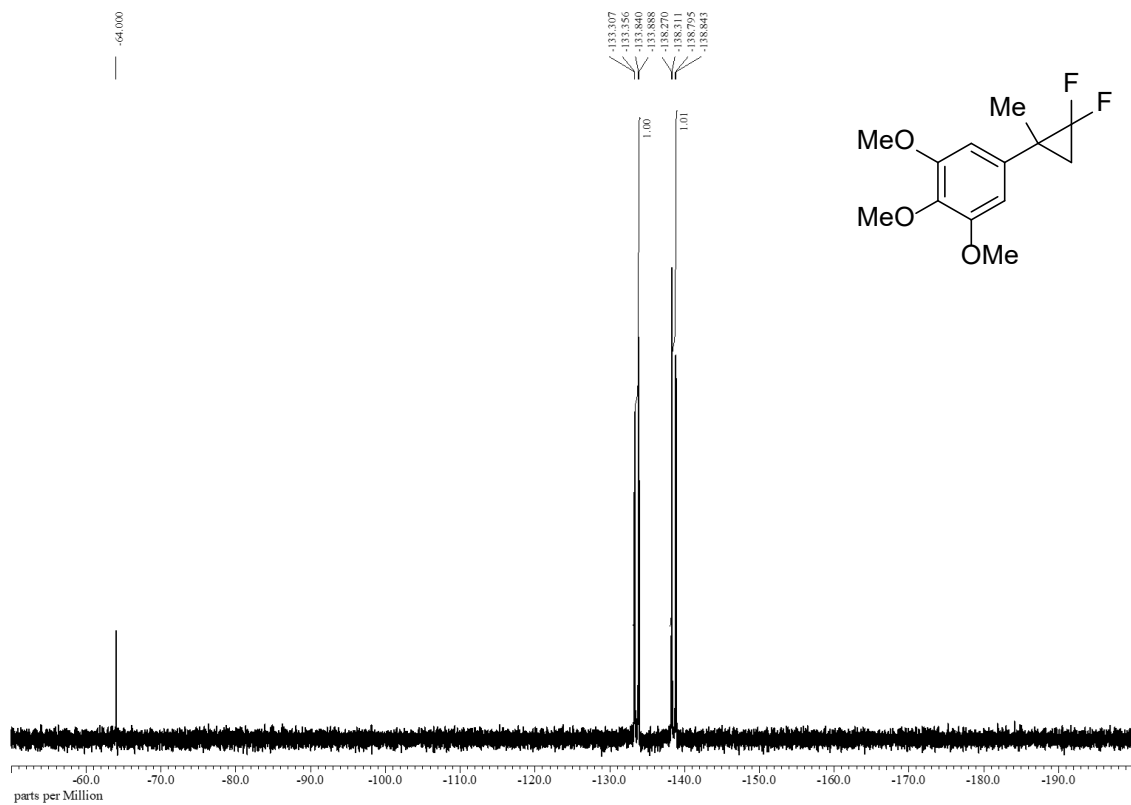

$^1\text{H}$  and  $^{13}\text{C}$  NMR spectra of (2,2-difluoro-3-methylcyclopropyl)-4-methoxybenzene (**1s**)

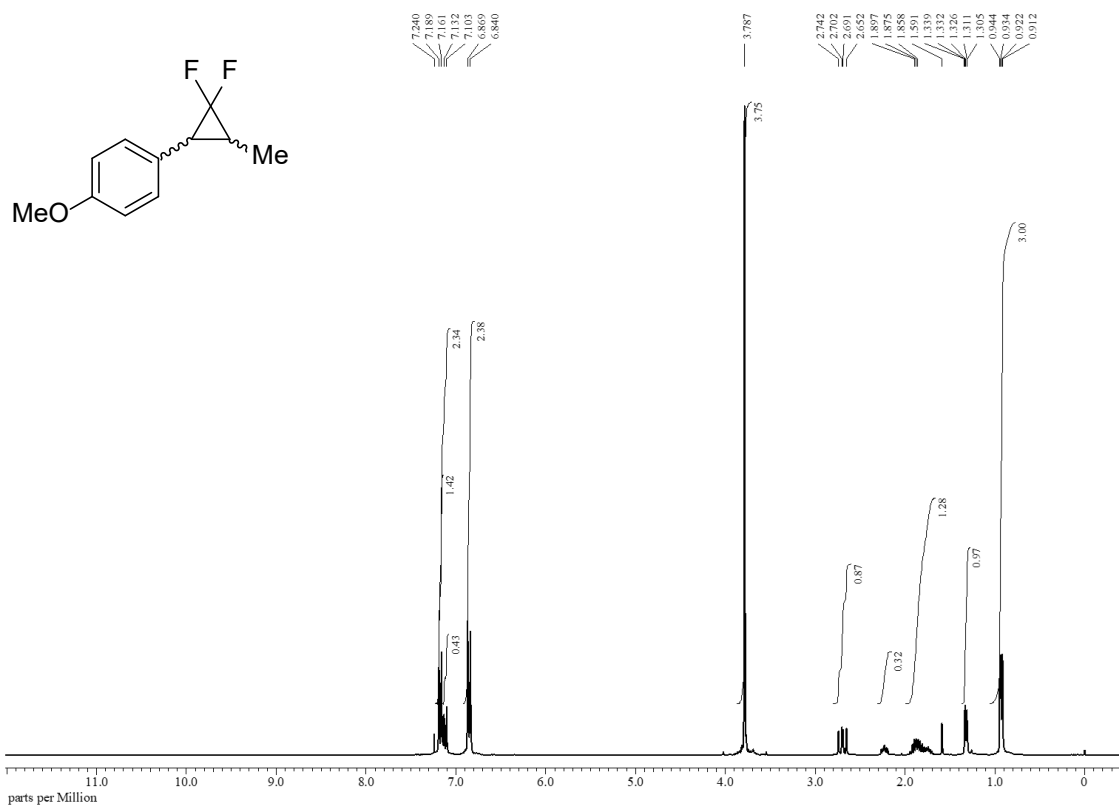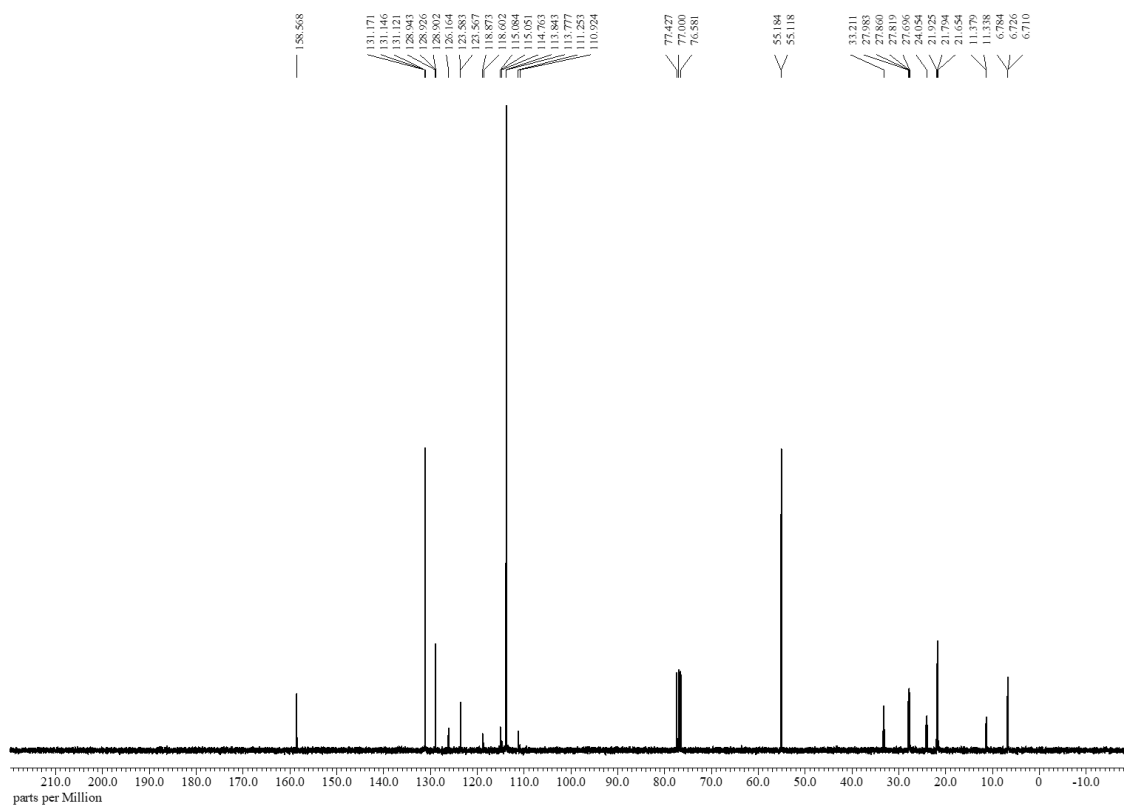

$^{19}\text{F}$  NMR spectrum of (2,2-difluoro-3-methylcyclopropyl)-4-methoxybenzene (**1s**)

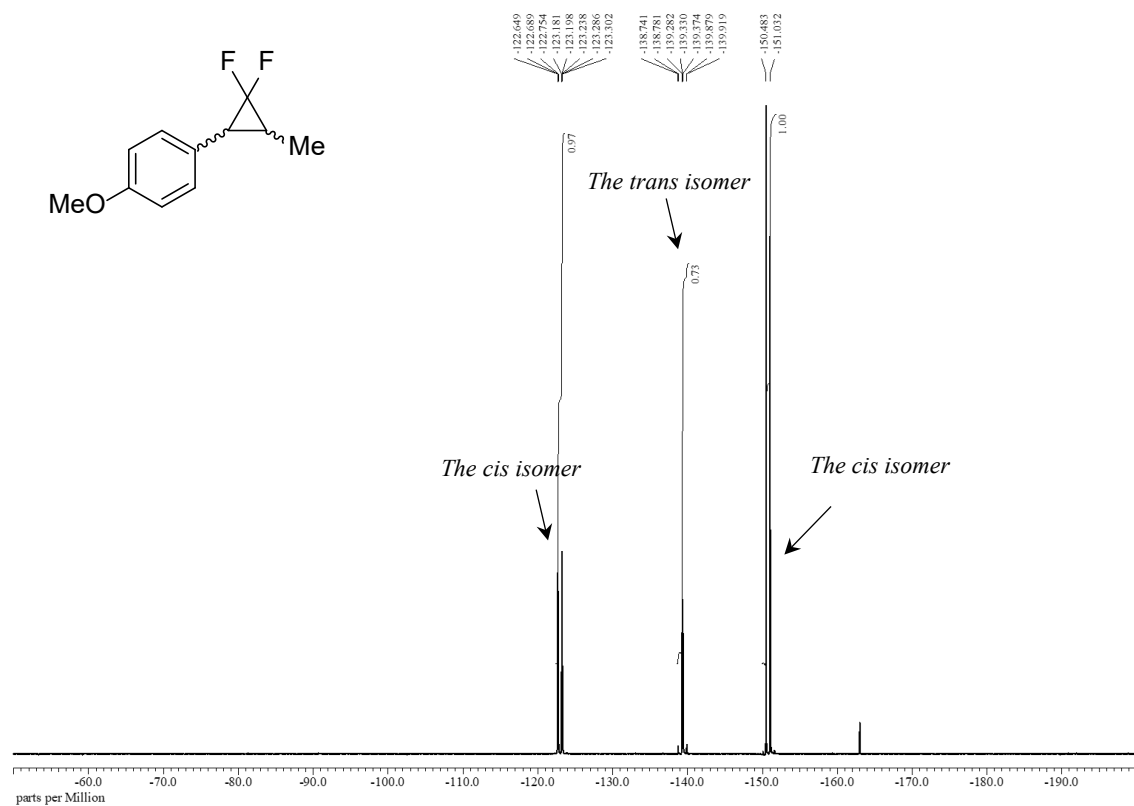

$^1\text{H}$  and  $^{13}\text{C}$  NMR spectra of *trans*-1-{2,2-difluoro-3-[(methoxymethoxy)methyl]cycloprop-1-yl}-4-methoxybenzene (**pre-1t**)

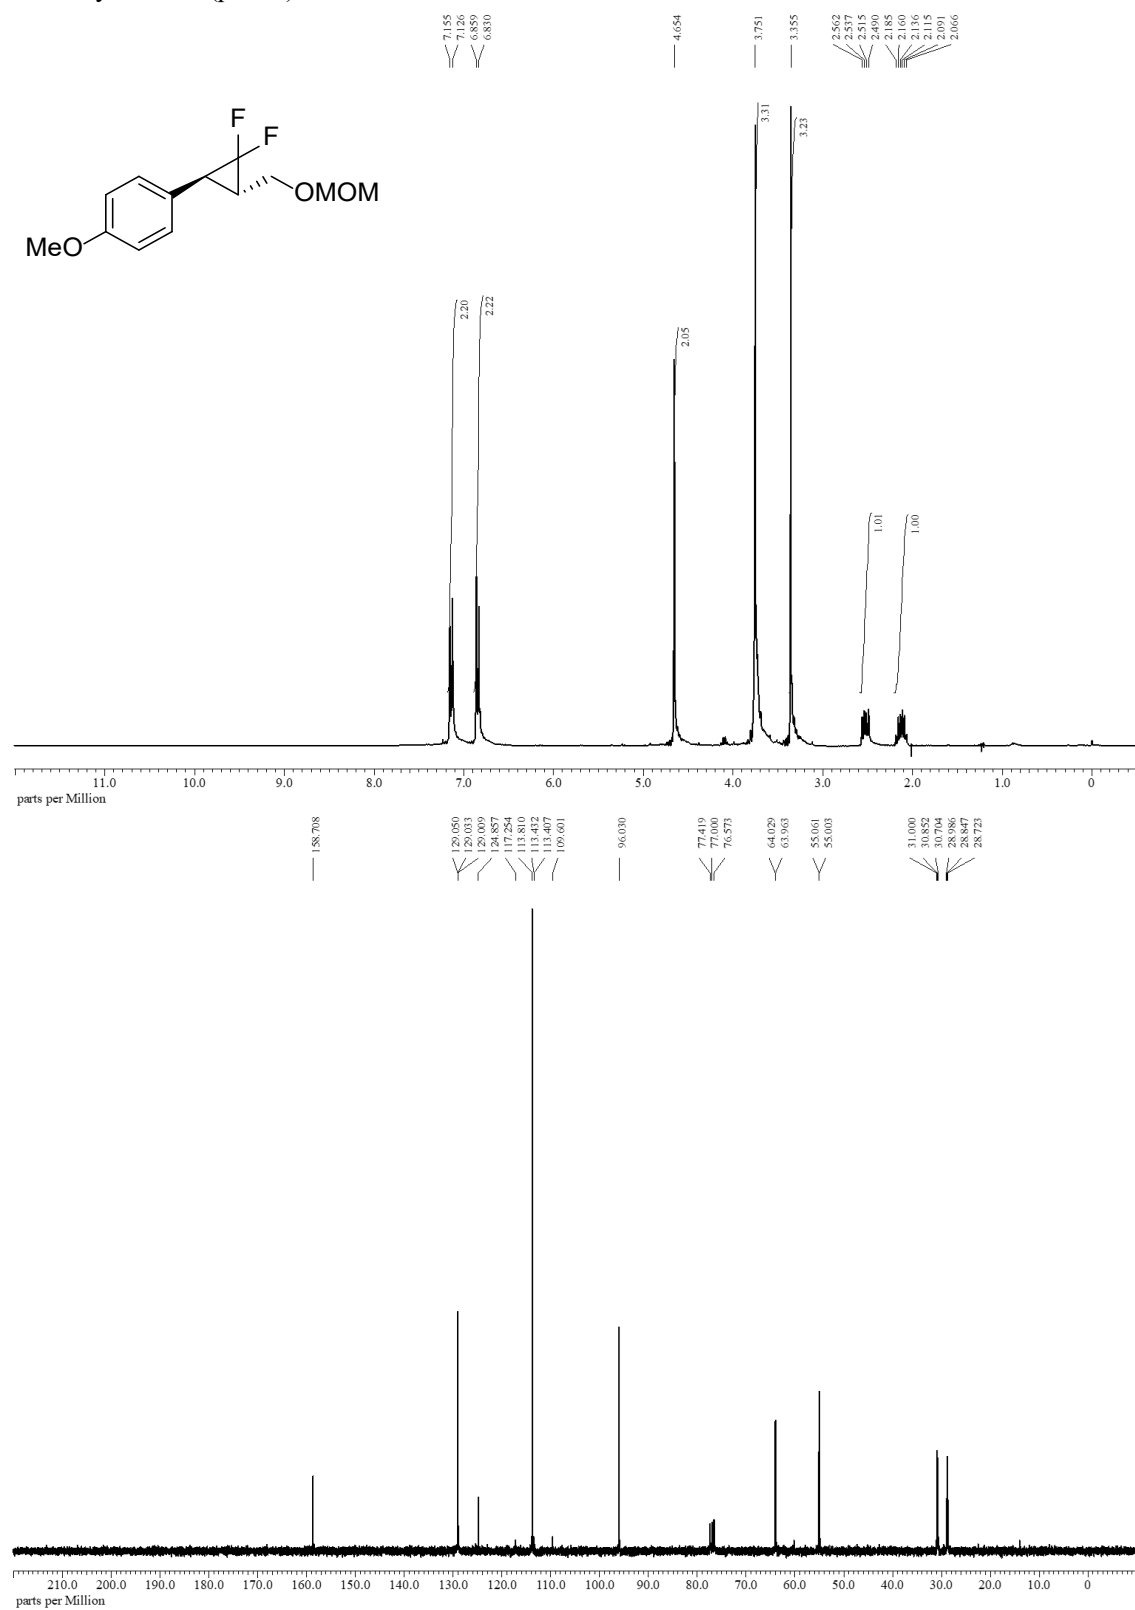



$^{19}\text{F}$  NMR spectrum of *trans*-1-{2,2-difluoro-3-[(methoxymethoxy)methyl]cyclopropyl}-4-methoxybenzene (**pre-1t**)

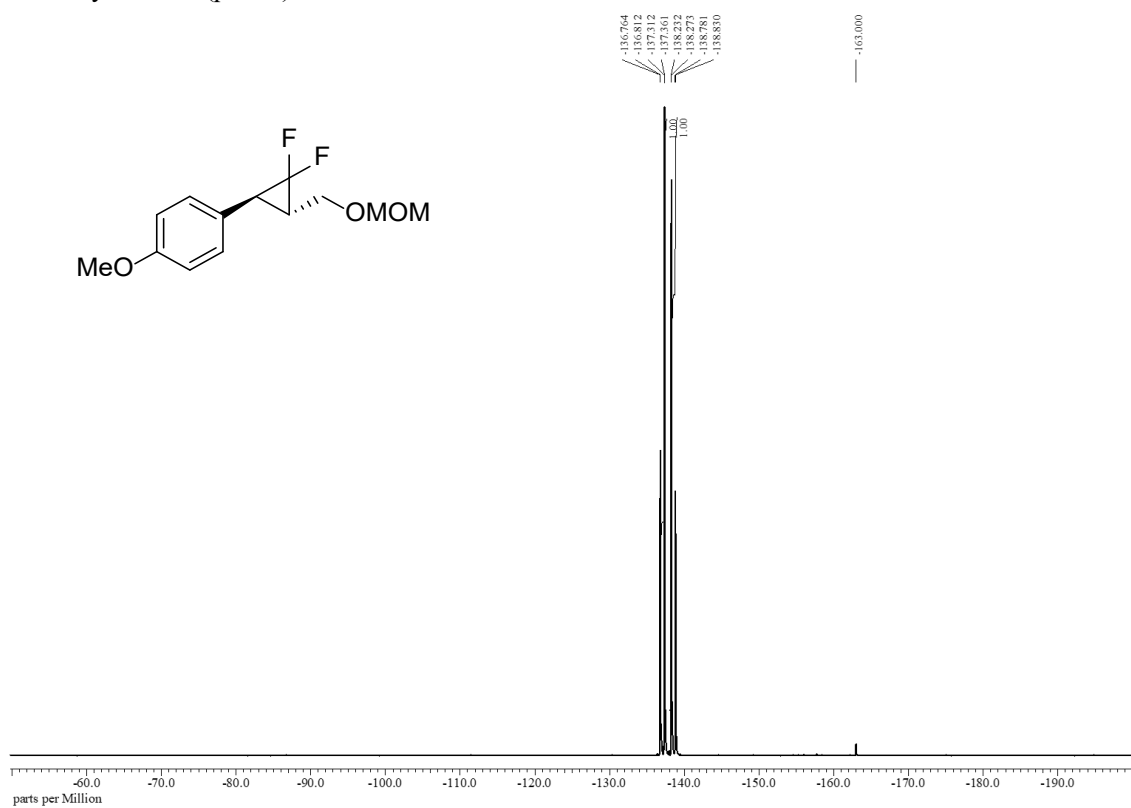

$^1\text{H}$  and  $^{13}\text{C}$  NMR spectra of *trans*-(2,2-difluoro-3-(4-methoxyphenyl)cyclopropyl)methanol (**1t**)

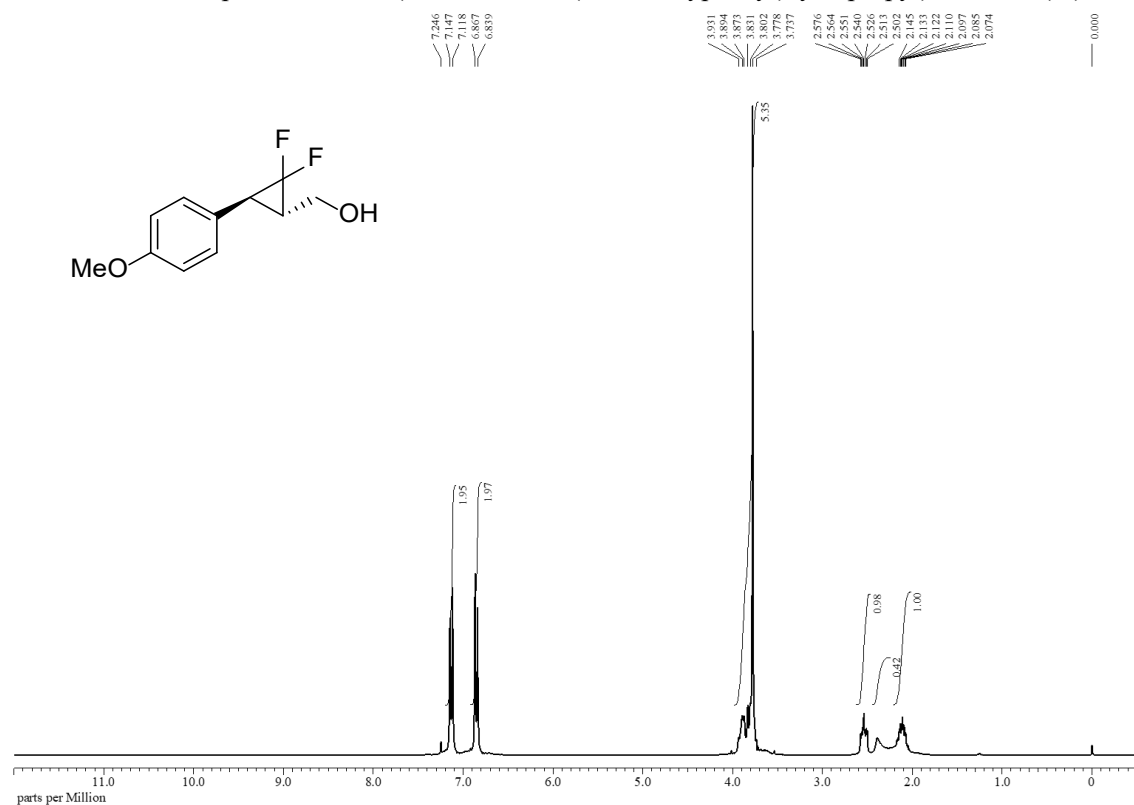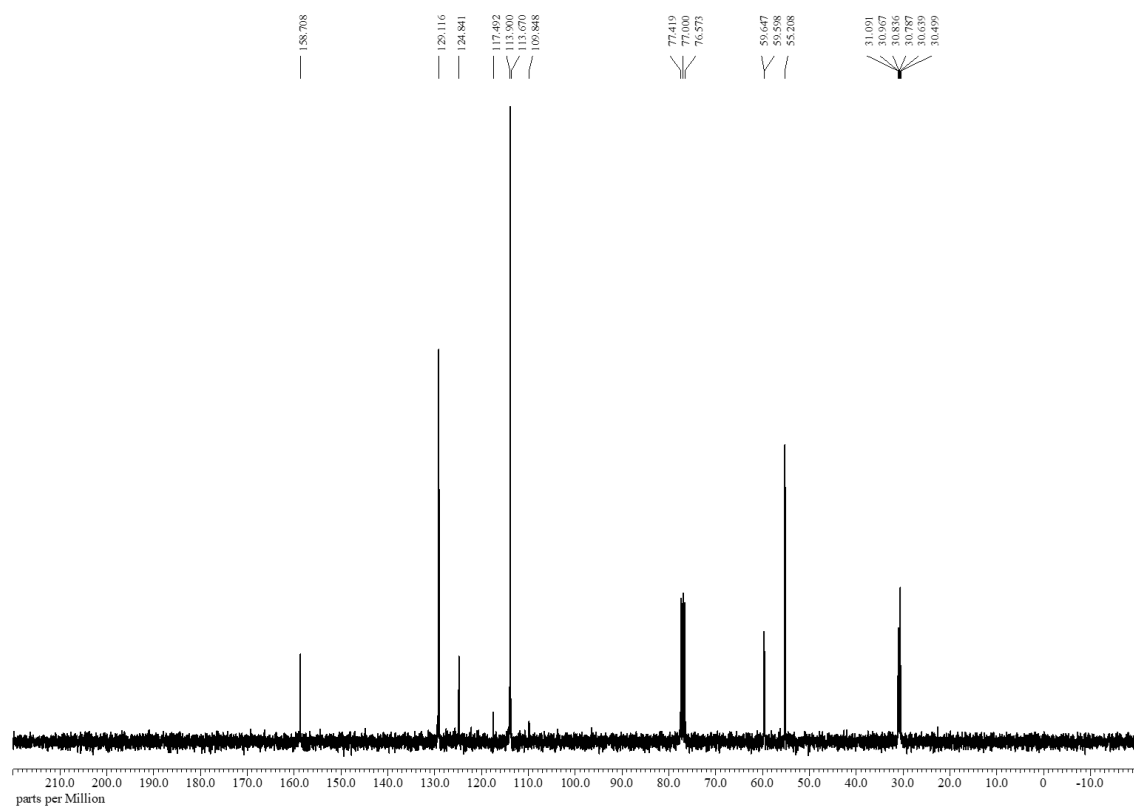

$^{19}\text{F}$  NMR spectrum of *trans*-(2,2-difluoro-3-(4-methoxyphenyl)cyclopropyl)methanol (**1t**)

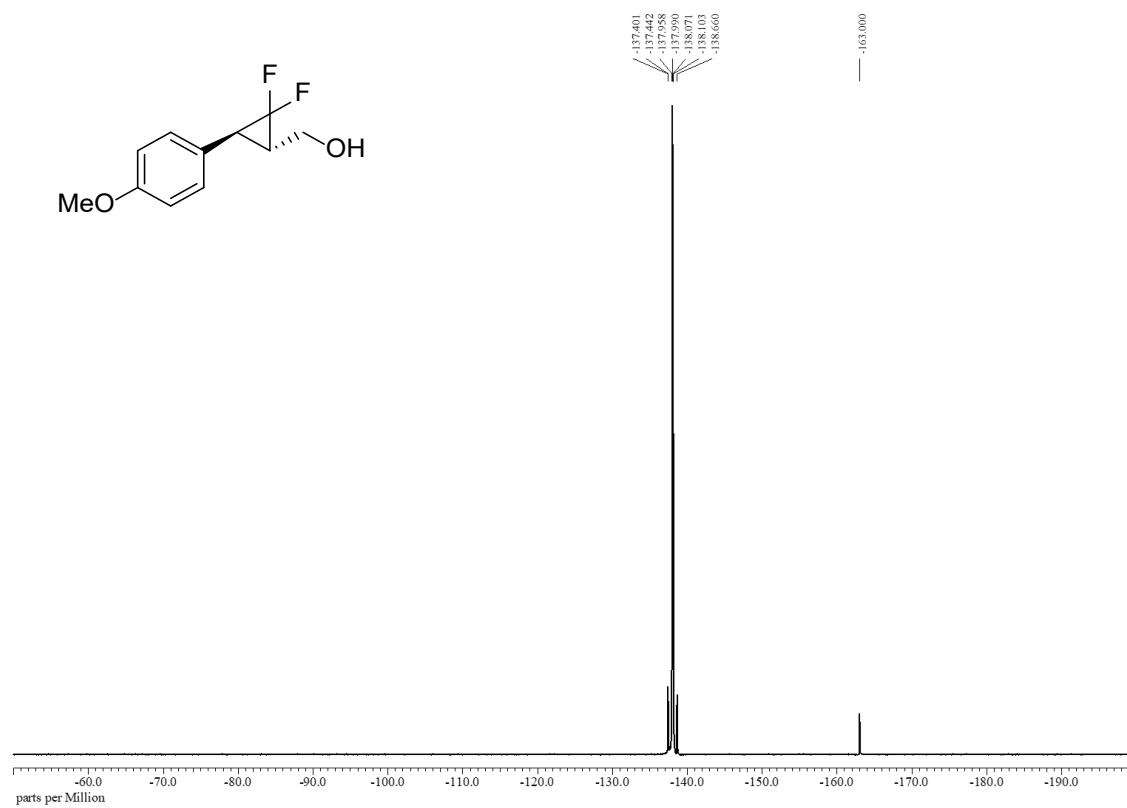

### *NMR spectra of the products.*

$^1\text{H}$  and  $^{13}\text{C}$  NMR spectra of (2,2-difluoro-1,3-diiodoprop-1-yl)-3-methoxybenzene (**3b**)

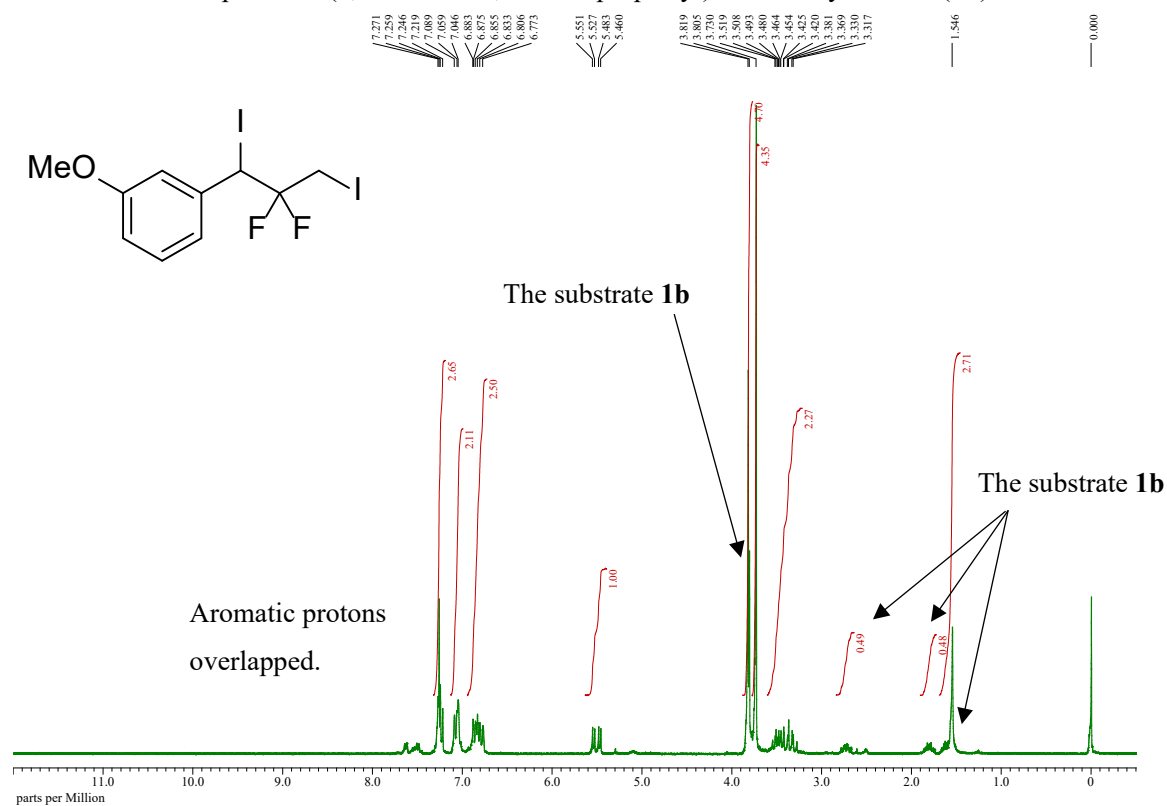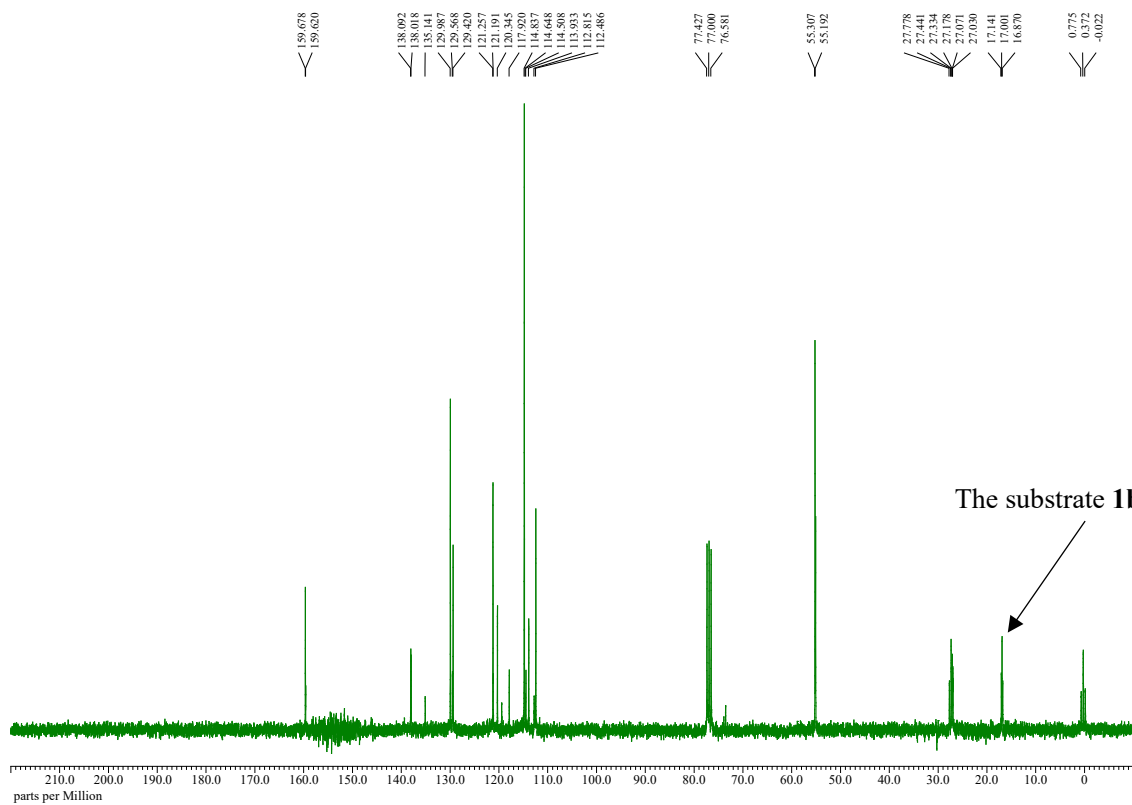

$^{19}\text{F}$  NMR spectrum of (2,2-difluoro-1,3-diiodoprop-1-yl)-3-methoxybenzene (**3b**)

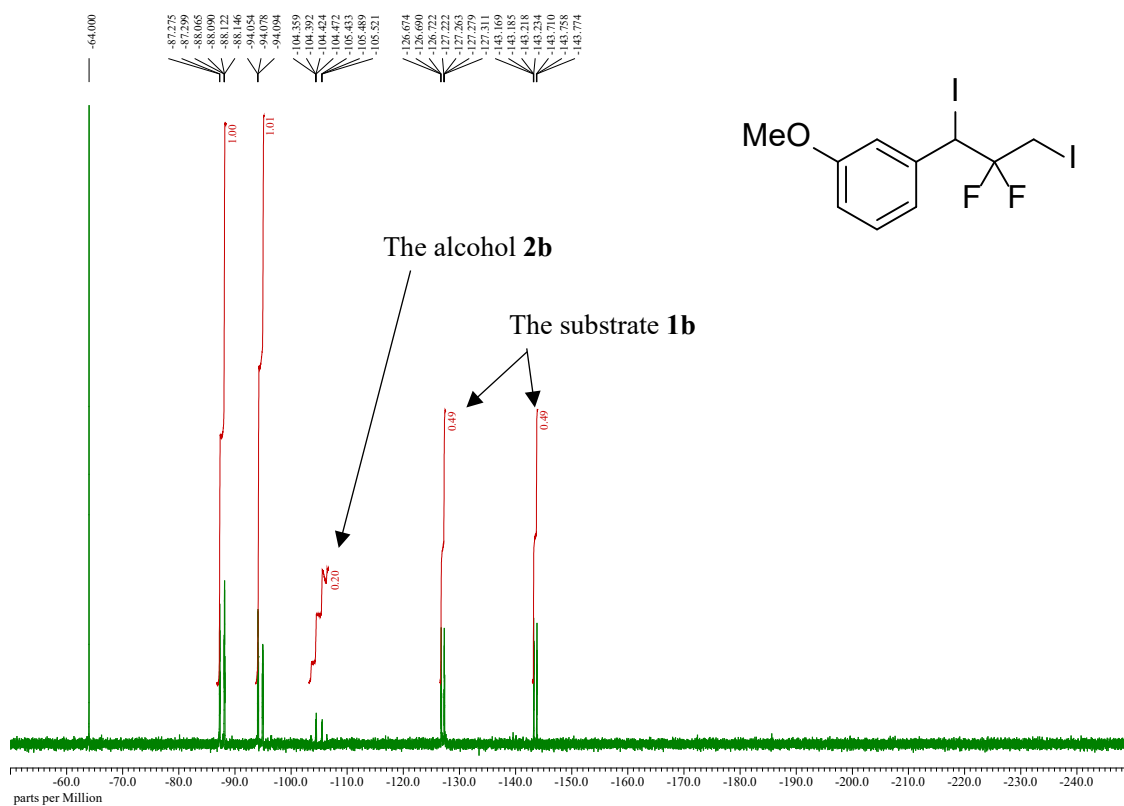

<sup>1</sup>H and <sup>13</sup>C NMR spectra of 2,2-difluoro-3-iodo-1-(2-methoxyphenyl)propan-1-ol (**2c**)

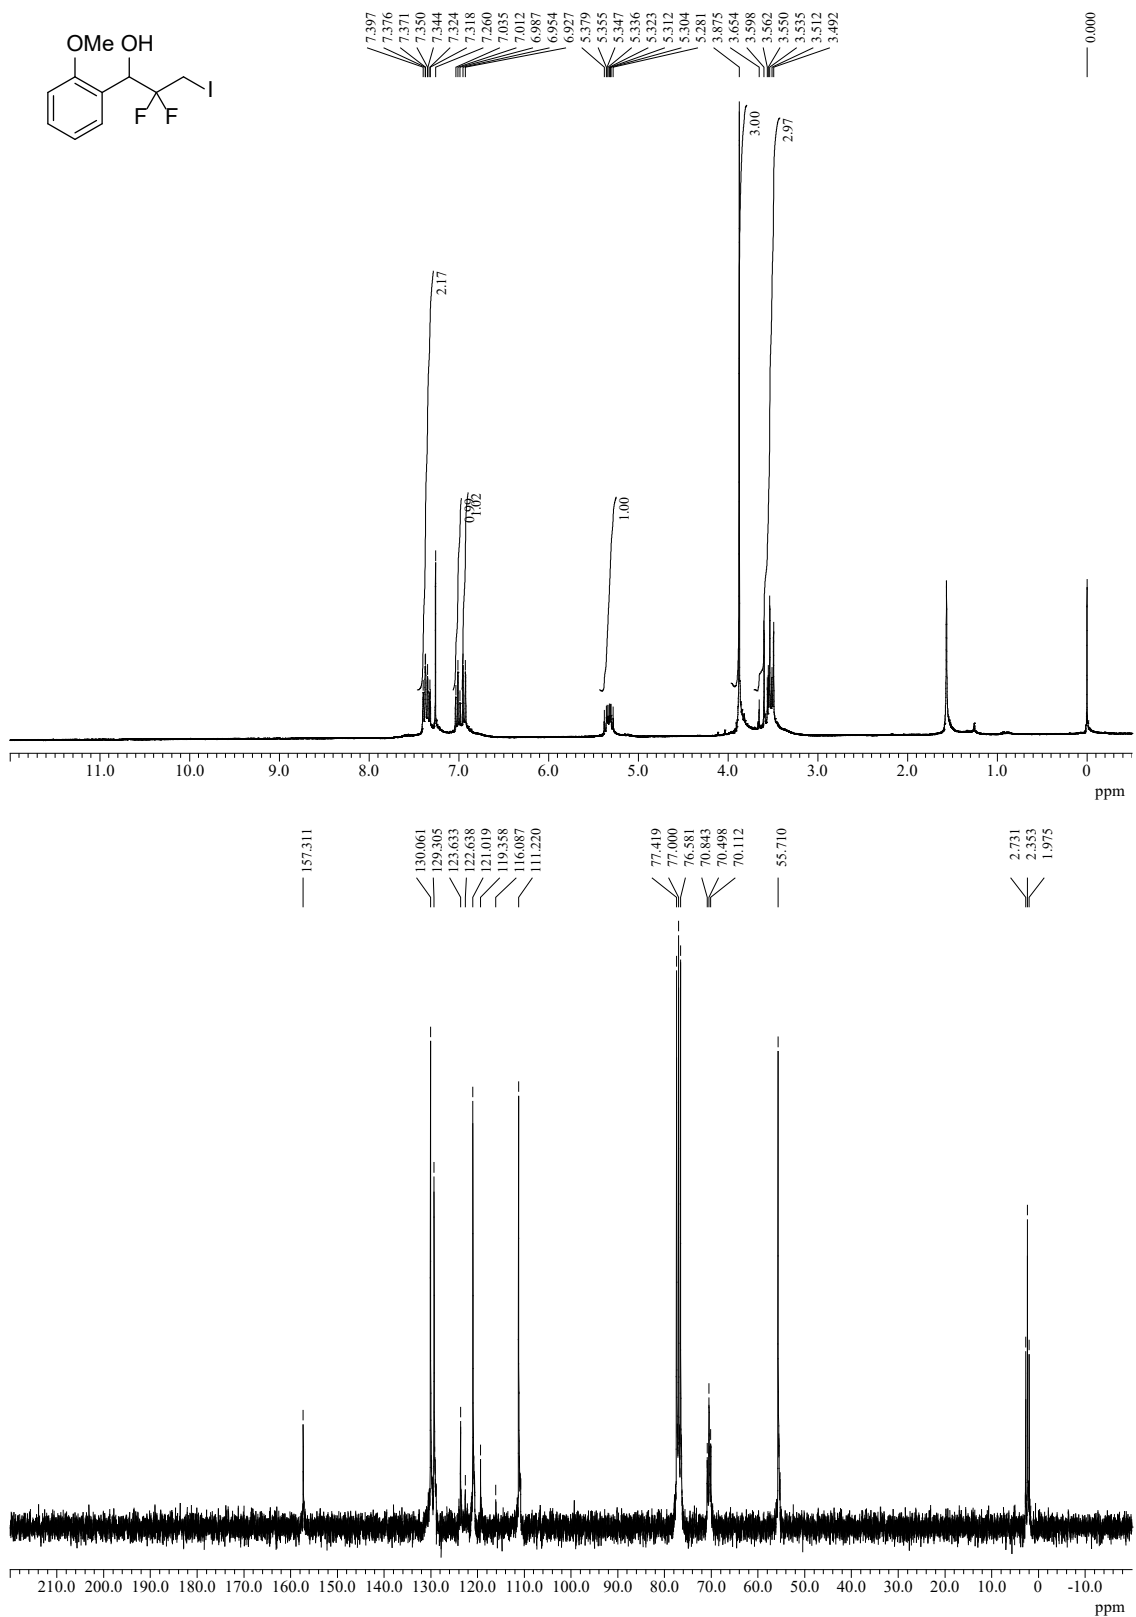

$^{19}\text{F}$  NMR spectrum of 2,2-difluoro-3-iodo-1-(2-methoxyphenyl)propan-1-ol (**2c**)

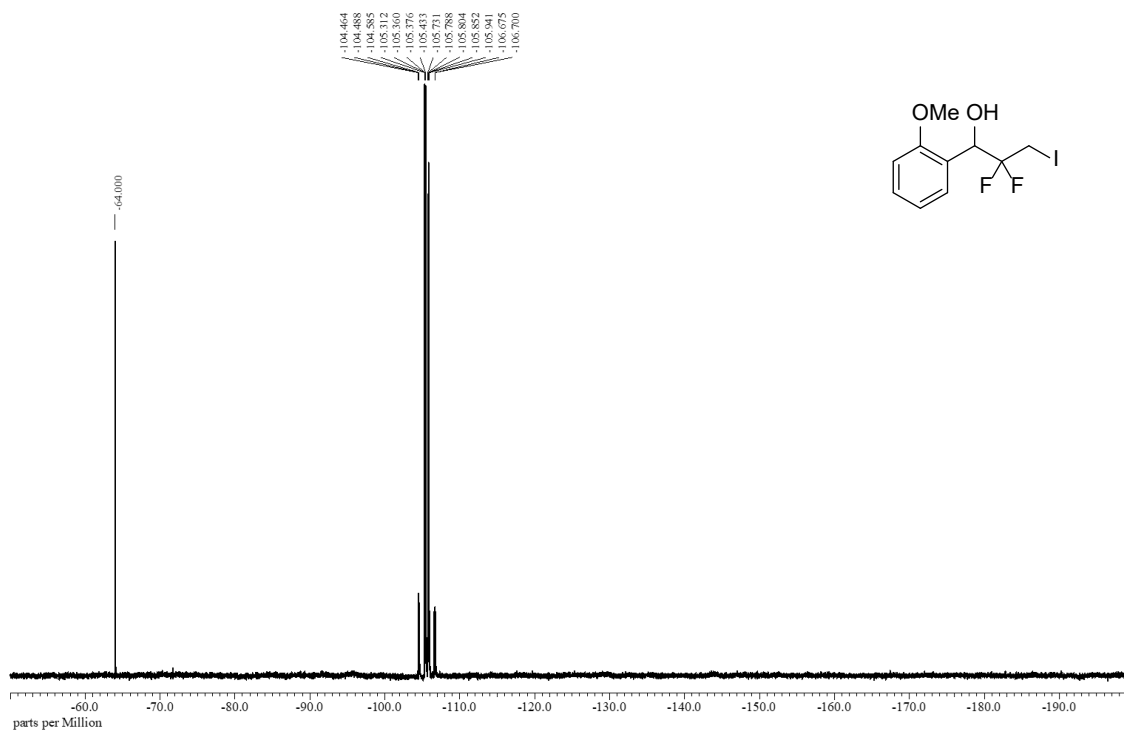

$^1\text{H}$  and  $^{13}\text{C}$  NMR spectra of 2,2-difluoro-3-iodo-1-(3,4,5-trimethoxyphenyl)propan-1-ol (**2d**)

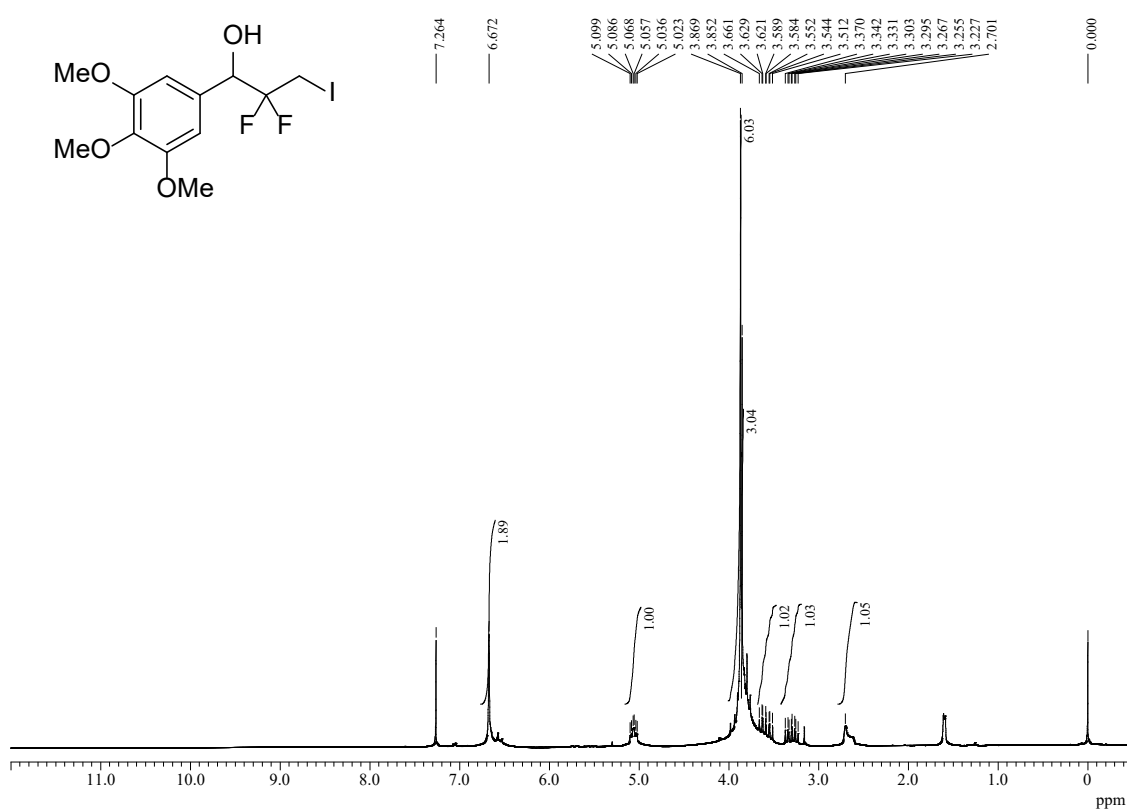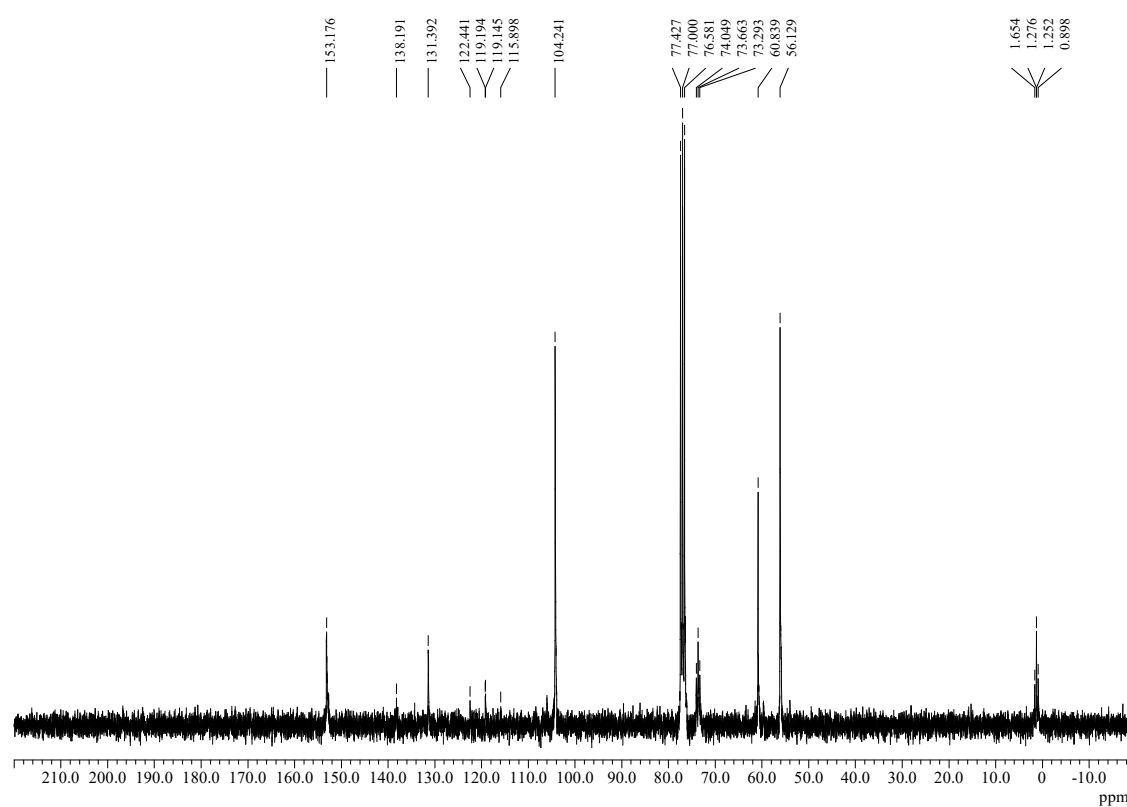



$^{19}\text{F}$  NMR spectrum of 2,2-difluoro-3-iodo-1-(3,4,5-trimethoxyphenyl)propan-1-ol (**2d**)

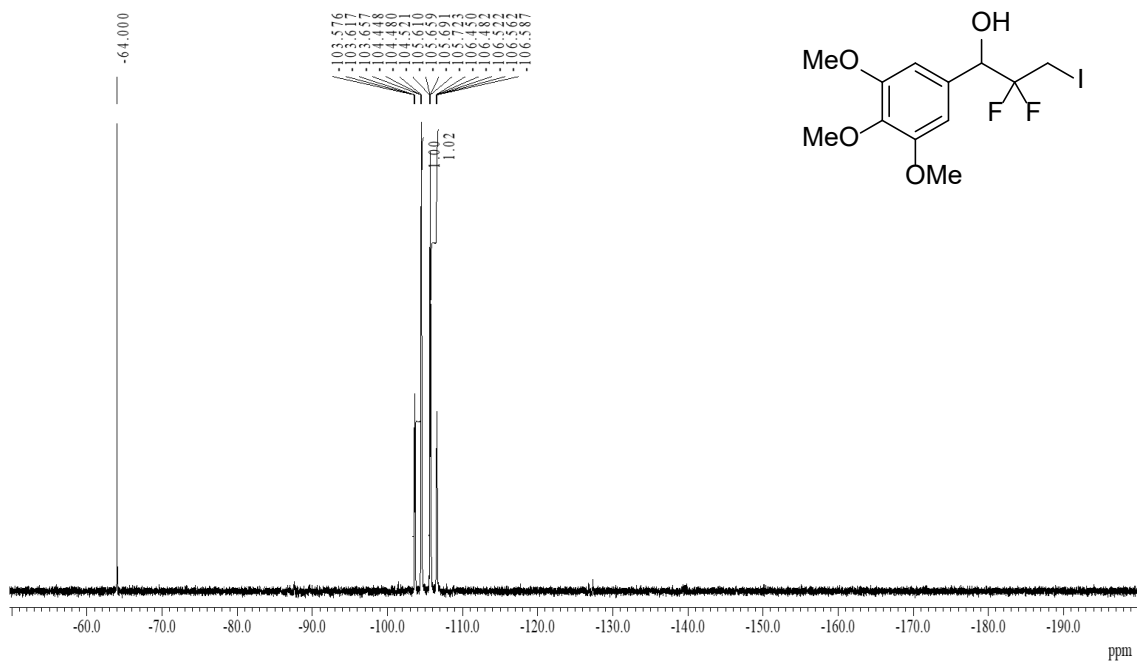

$^1\text{H}$  and  $^{13}\text{C}$  NMR spectra of 2,2-difluoro-3-iodo-1-(4-hydroxyphenyl)propan-1-ol (**2e**)

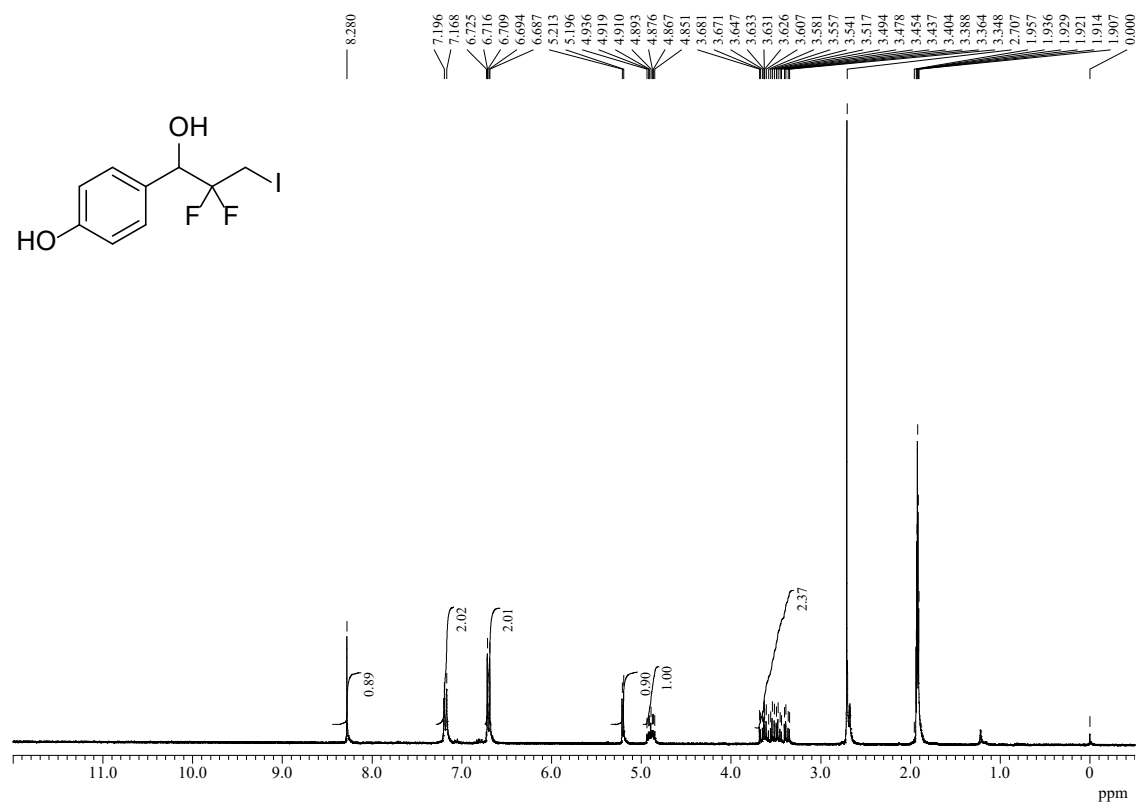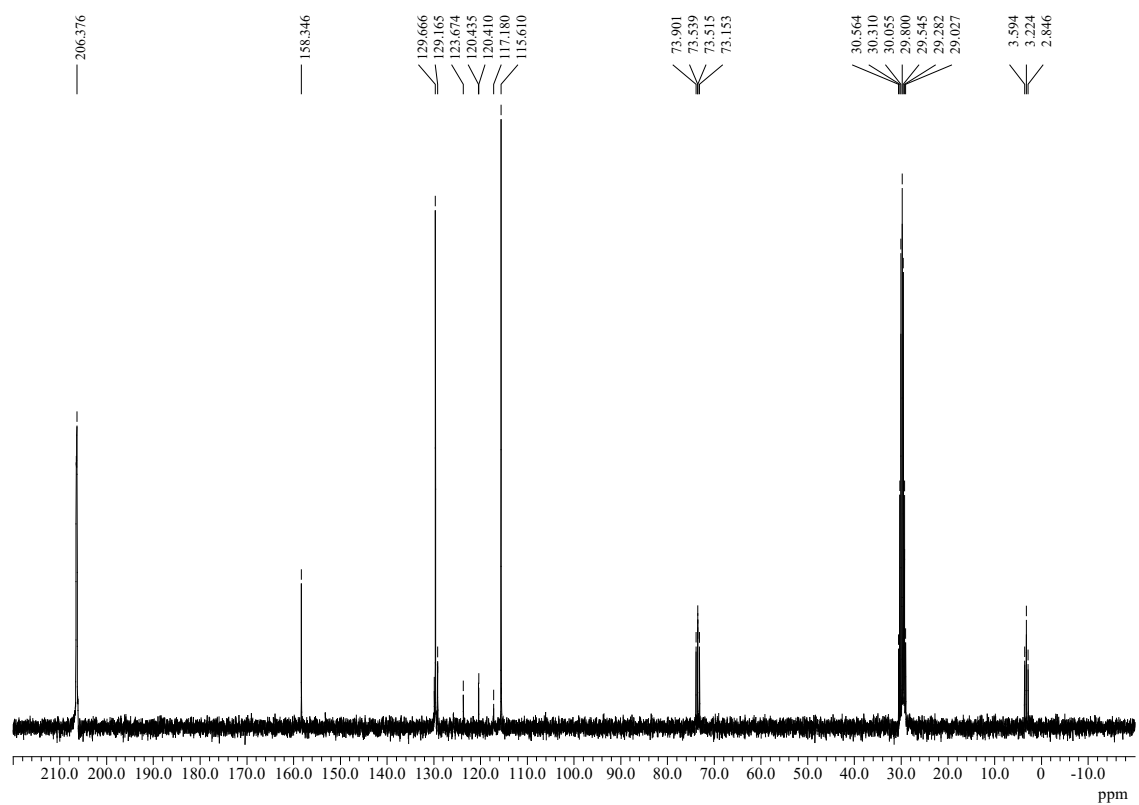

$^{19}\text{F}$  NMR spectrum of 2,2-difluoro-3-iodo-1-(4-hydroxyphenyl)propan-1-ol (**2e**)

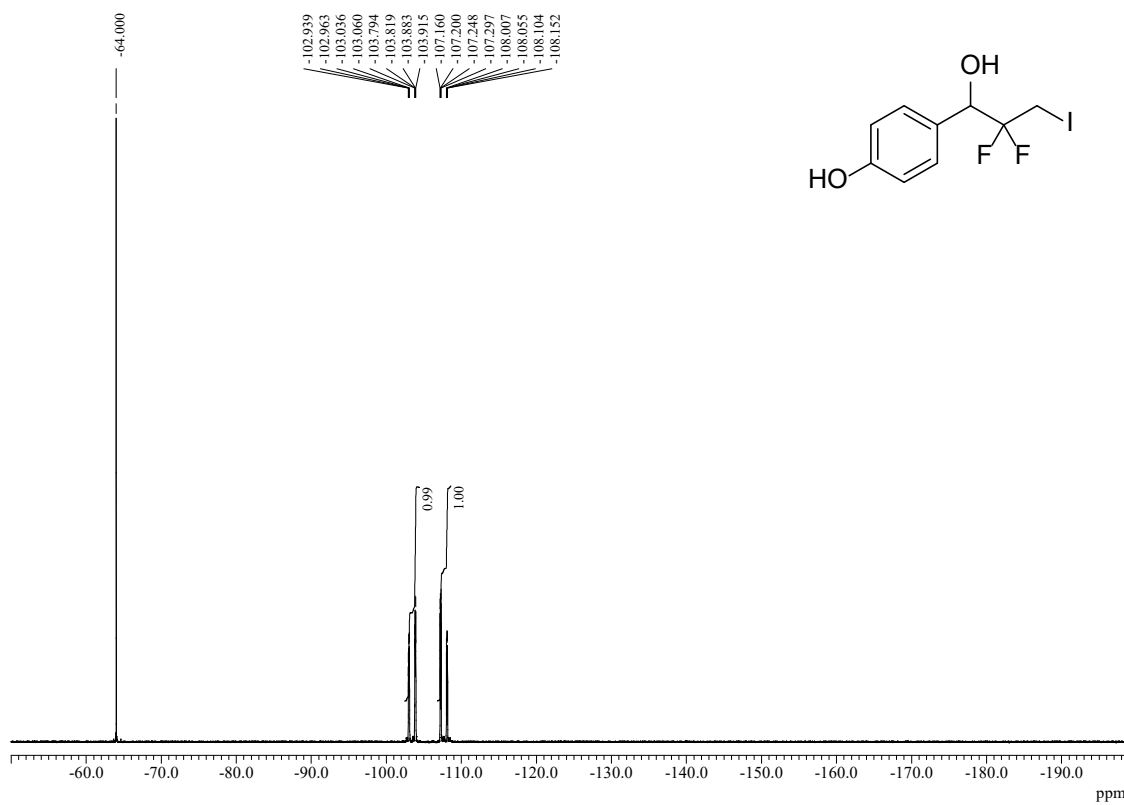

$^1\text{H}$  and  $^{13}\text{C}$  NMR spectra of 2,2-difluoro-3-iodo-1-phenylpropan-1-ol (**2g**)

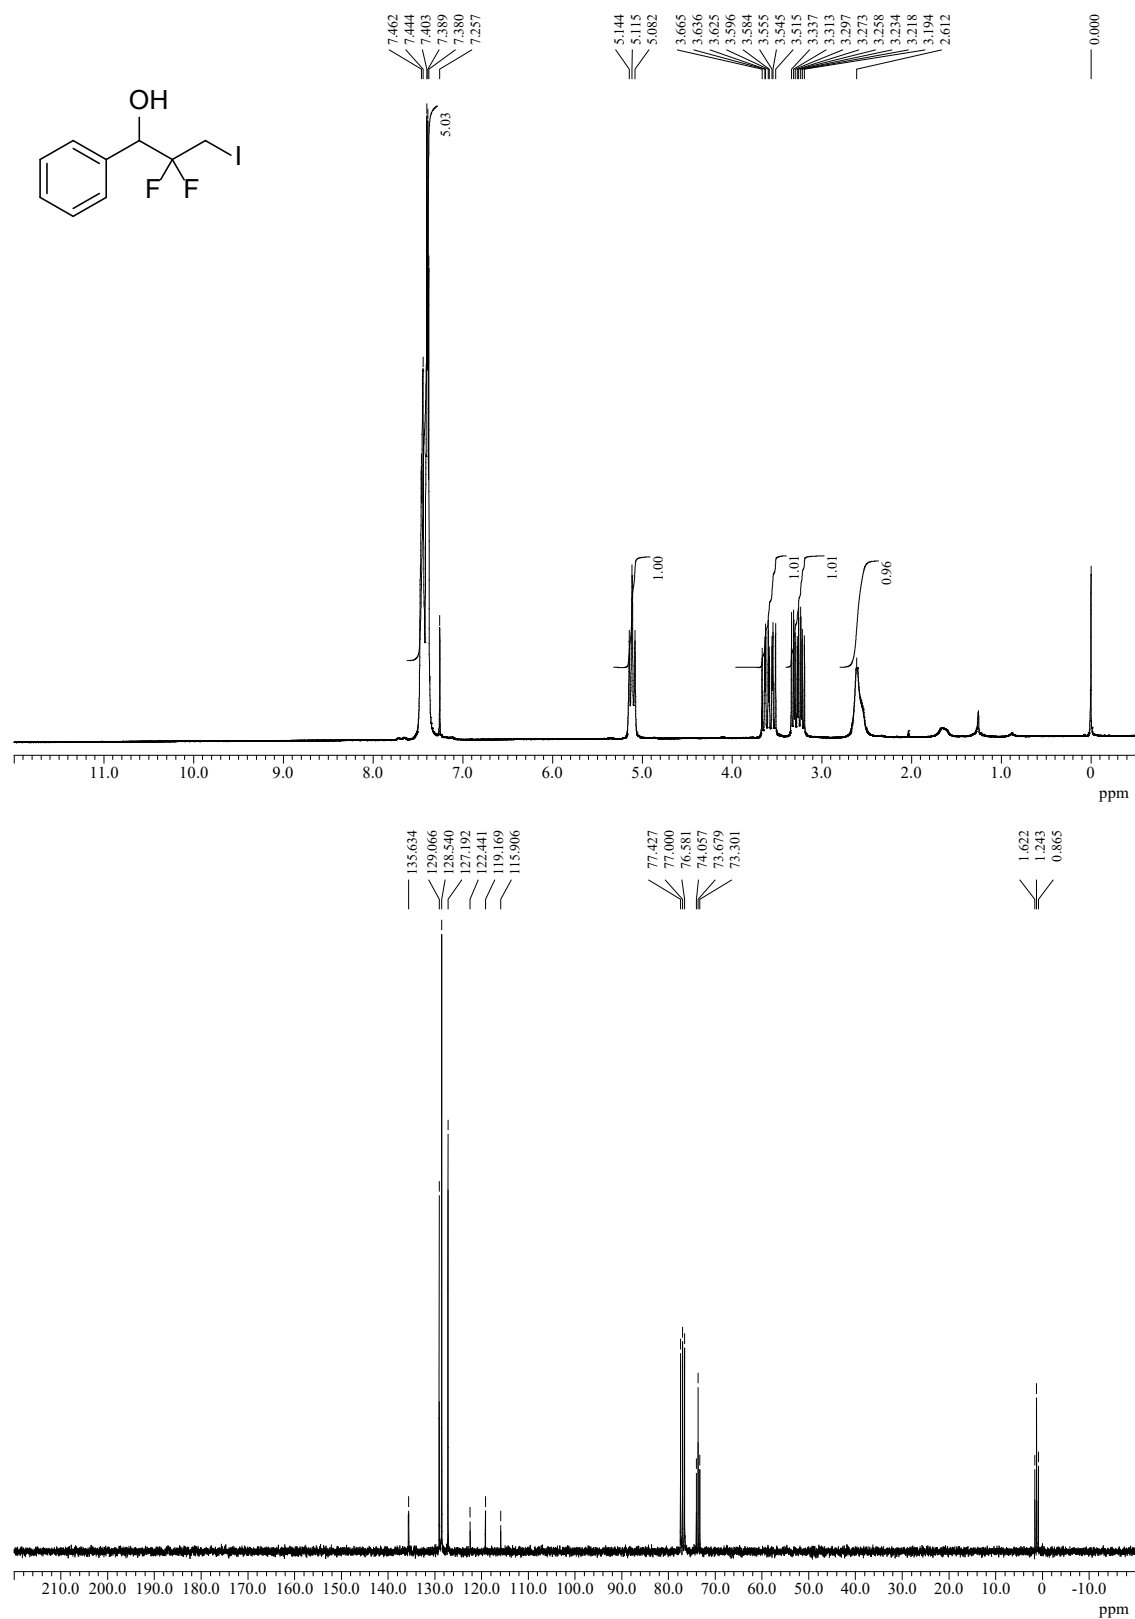

$^{19}\text{F}$  NMR spectrum of 2,2-difluoro-3-iodo-1-phenylpropan-1-ol (**2g**)

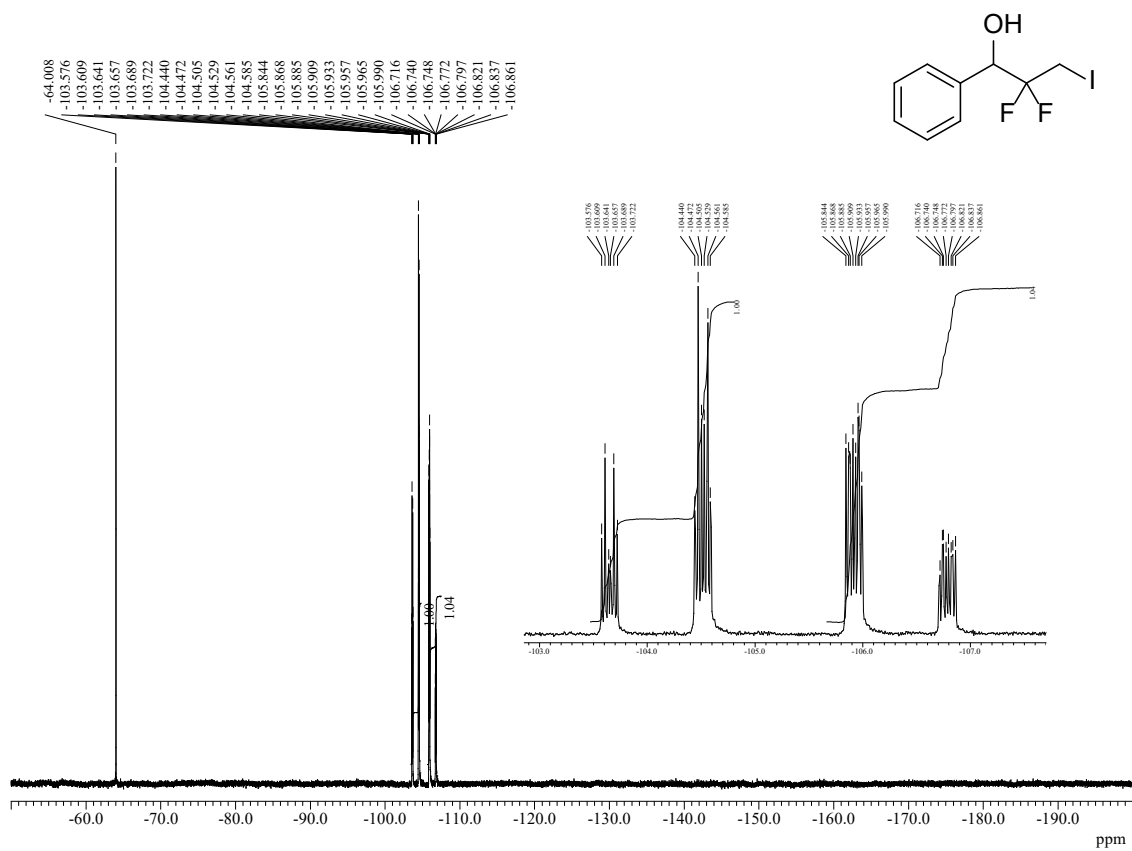

$^1\text{H}$  and  $^{13}\text{C}$  NMR spectra of 1-(4-bromophenyl)-2,2-difluoro-3-iodopropan-2-ol (**2h**)

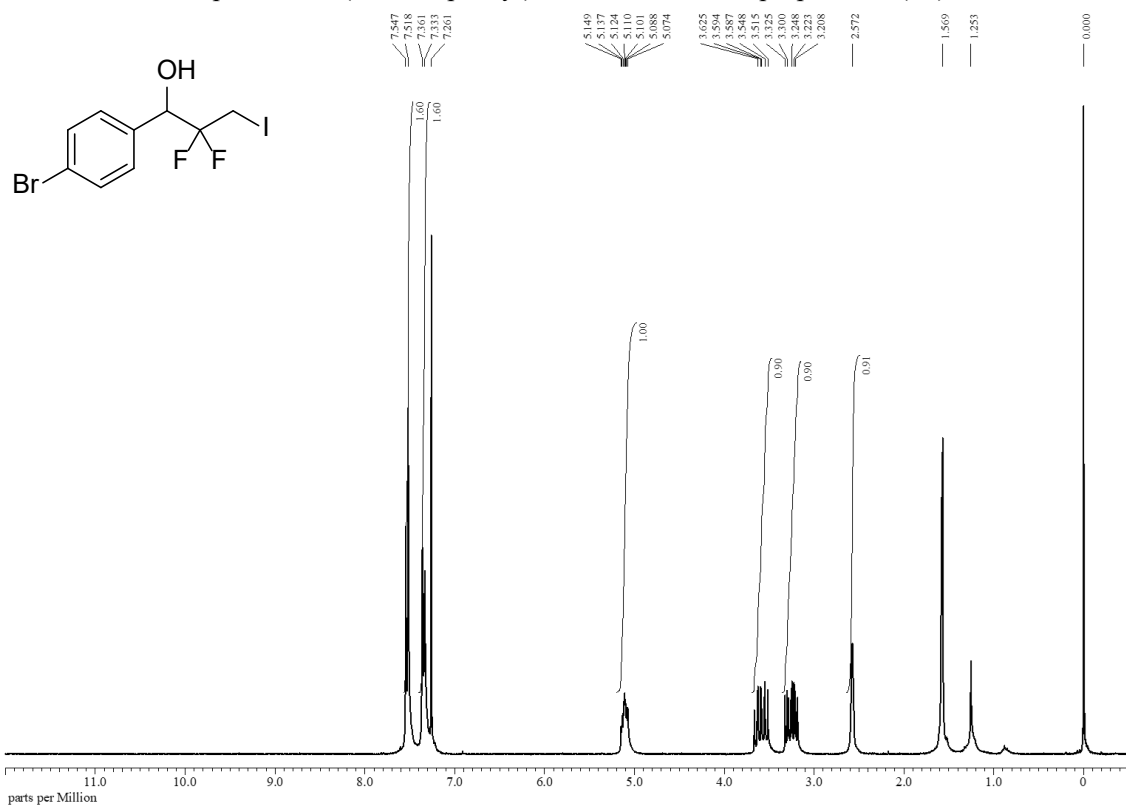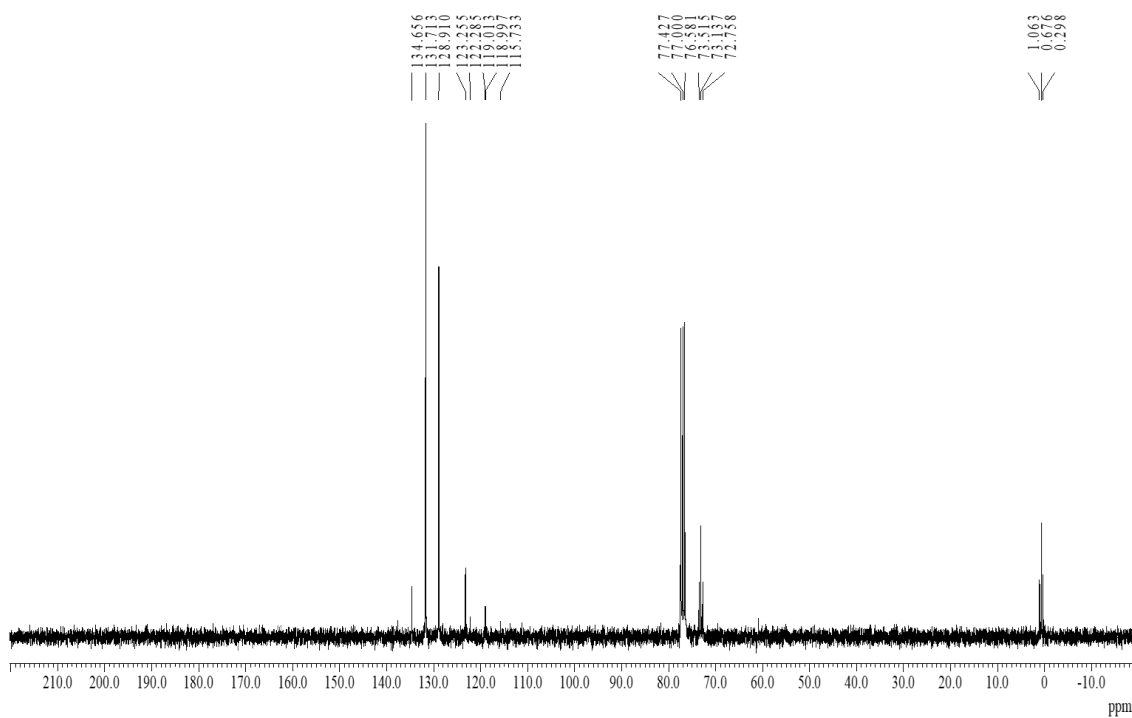

$^{19}\text{F}$  NMR spectrum of 1-(4-bromophenyl)-2,2-difluoro-3-iodopropan-2-ol (**2h**)

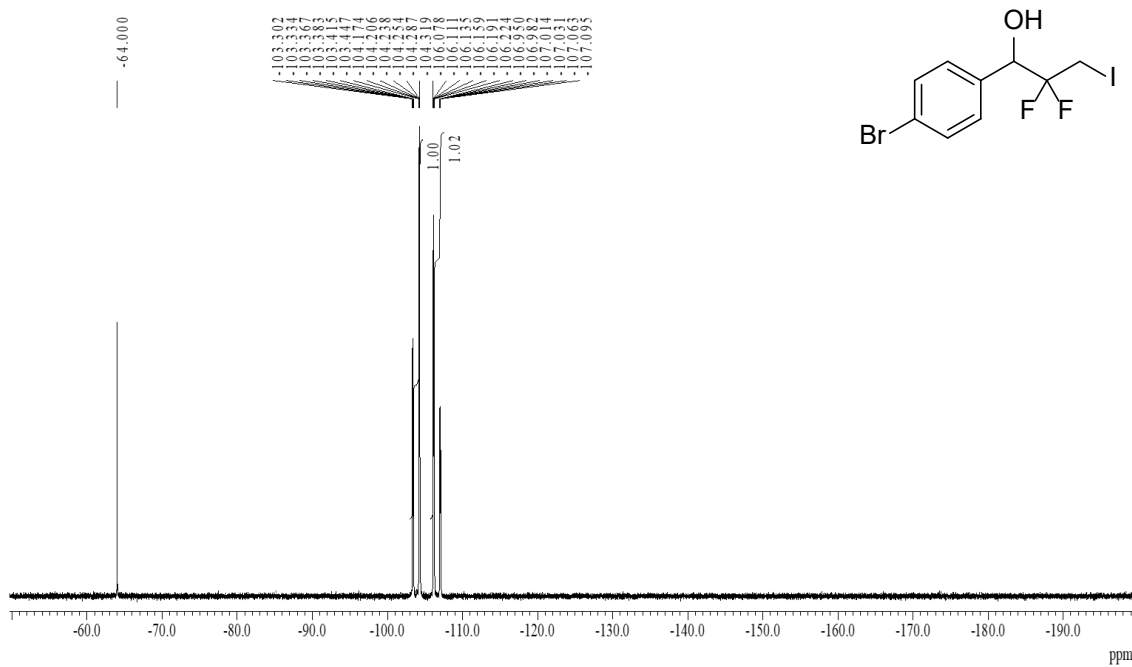

<sup>1</sup>H and <sup>13</sup>C NMR spectra of 3,3-difluoro-4-iodo-2-(3-methoxyphenyl)butan-2-ol (**2k**)

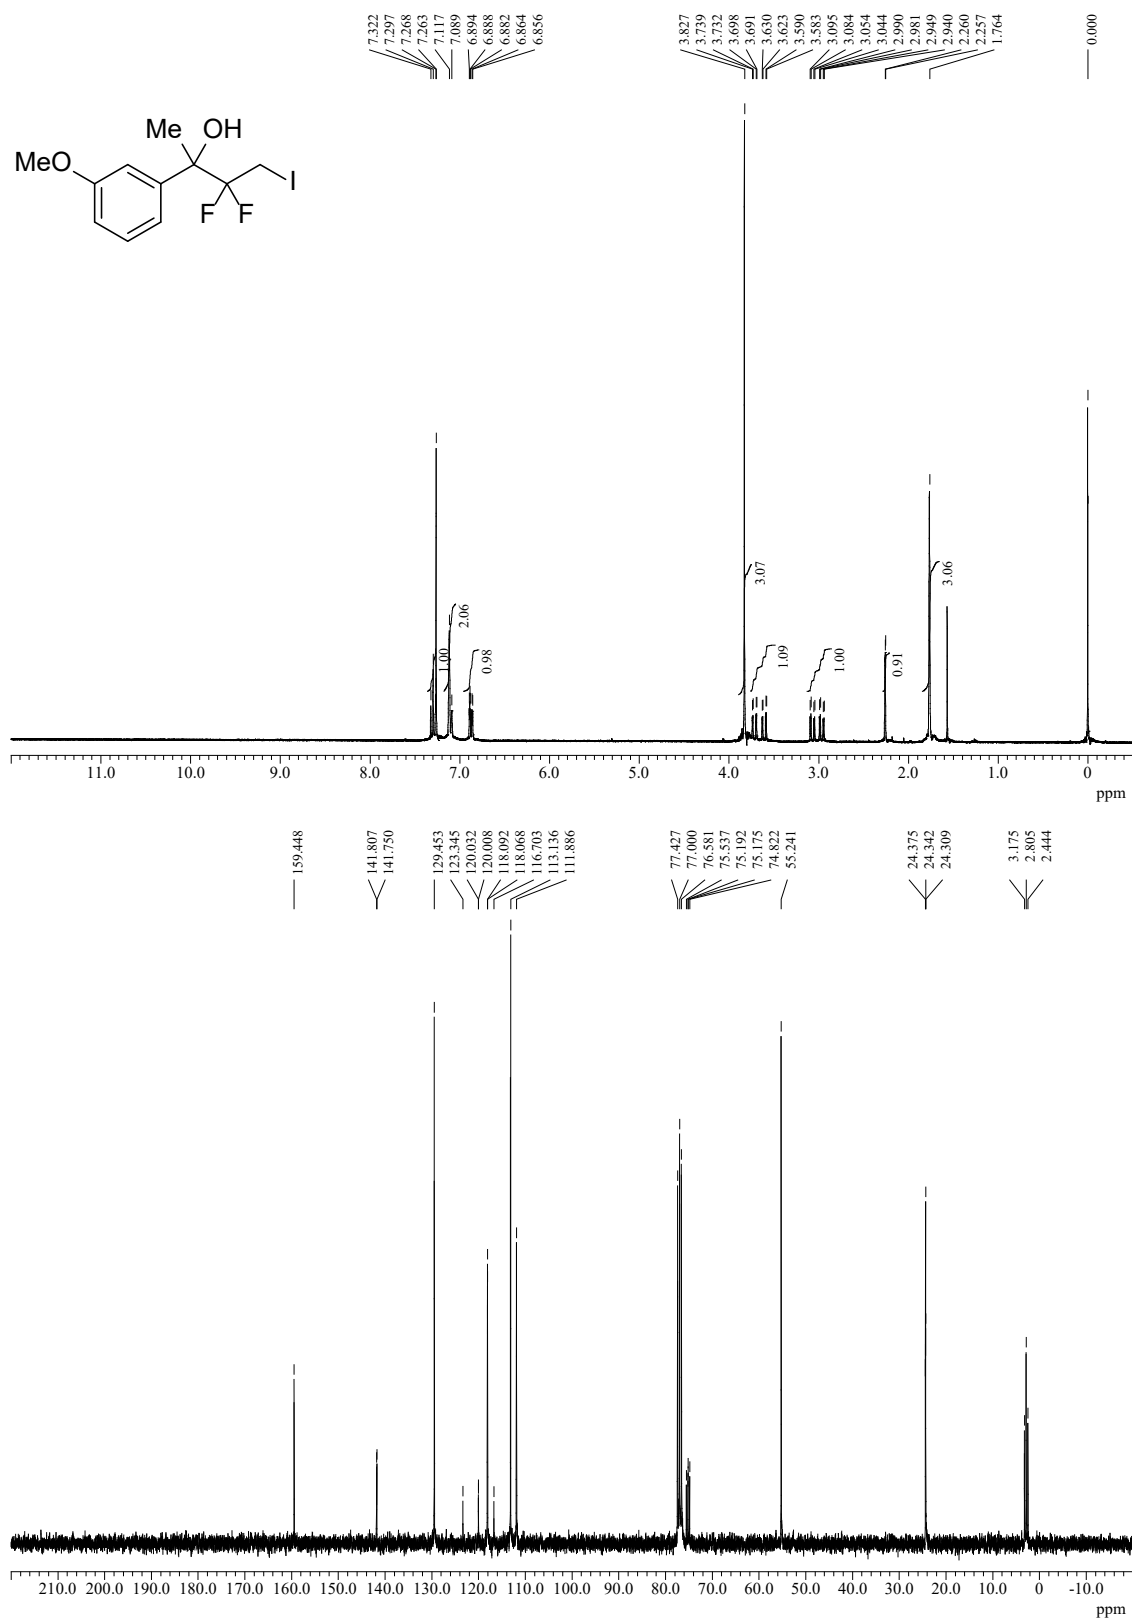



$^{19}\text{F}$  NMR spectrum of 3,3-difluoro-4-iodo-2-(3-methoxyphenyl)butan-2-ol (**2k**)

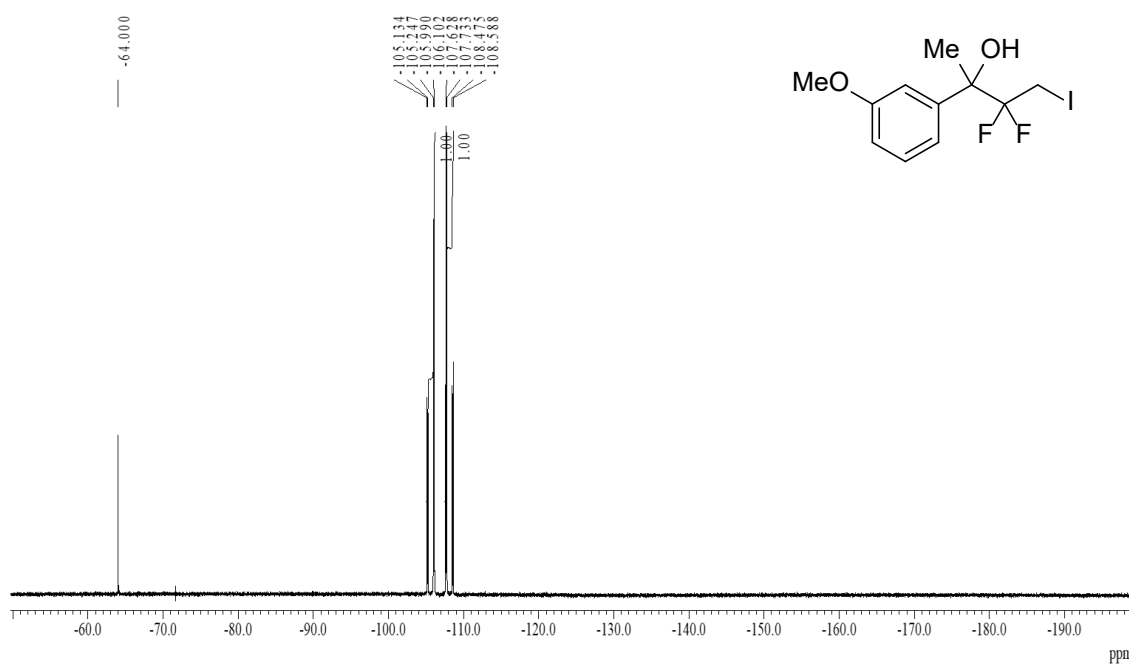

$^1\text{H}$  and  $^{13}\text{C}$  NMR spectra of 3,3-difluoro-4-iodo-2-(3,4,5-trimethoxyphenyl)butan-2-ol (**2m**)

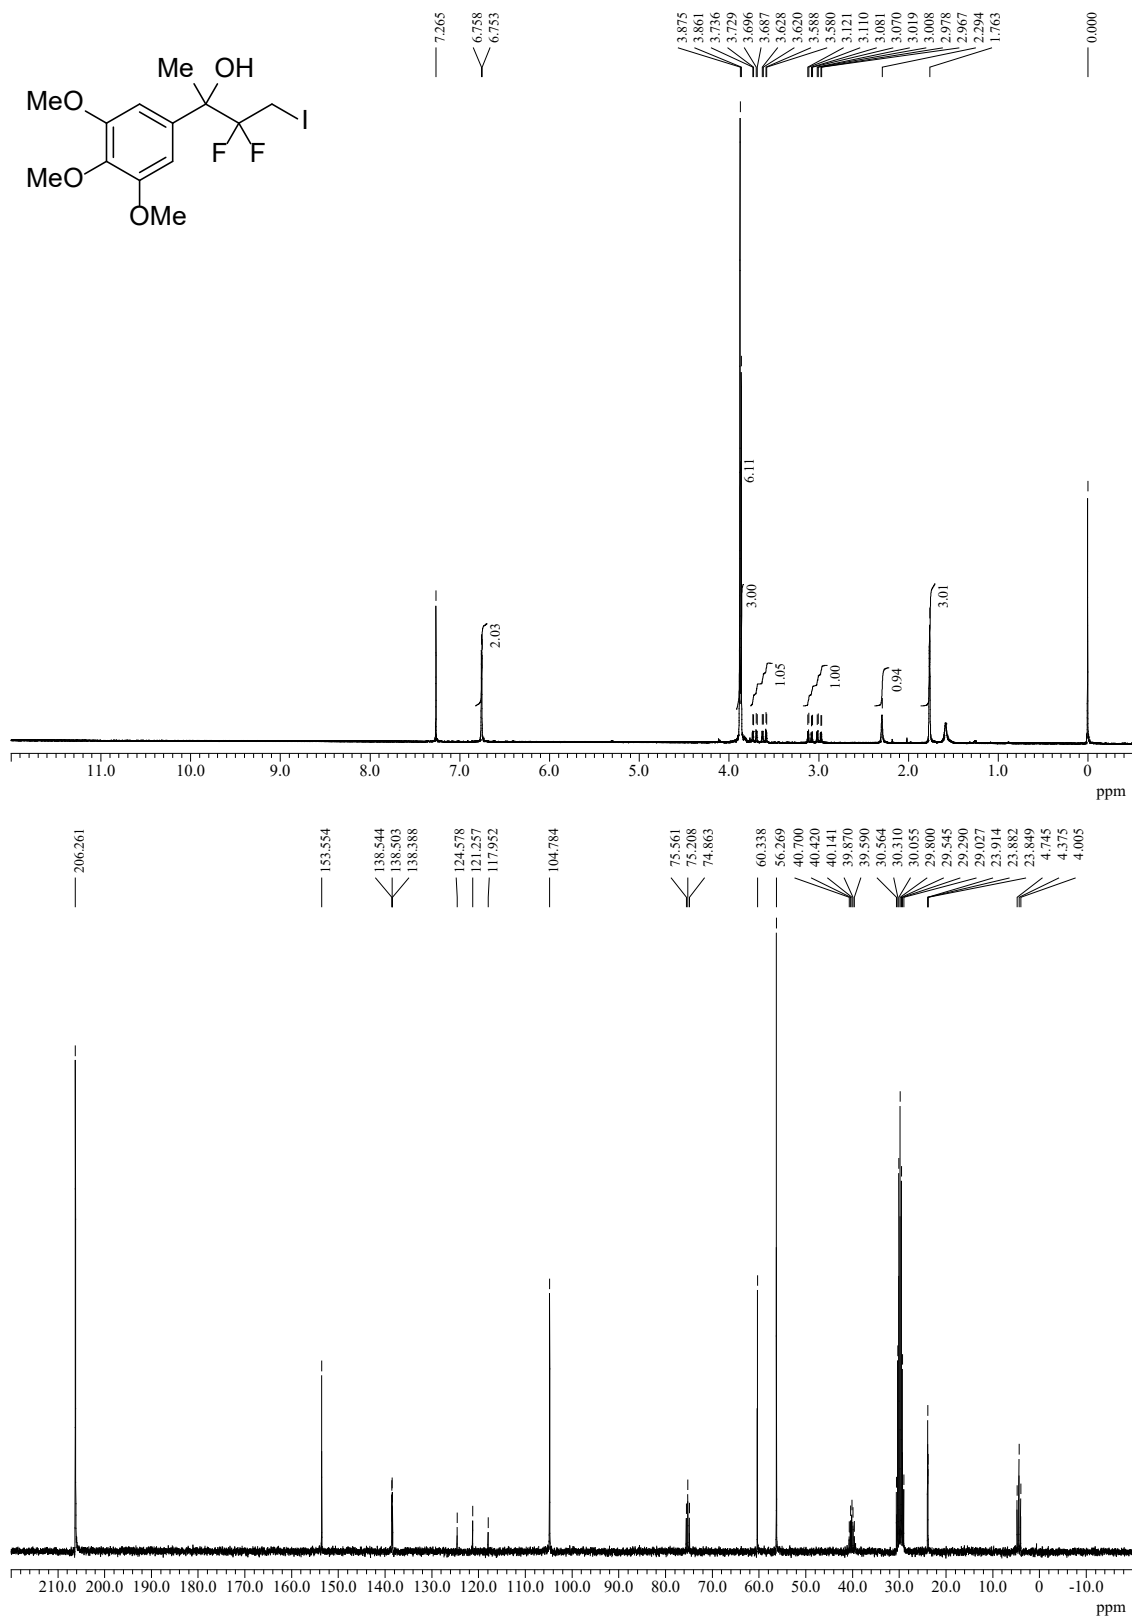

$^{19}\text{F}$  NMR spectrum of 3,3-difluoro-4-iodo-2-(3,4,5-trimethoxyphenyl)butan-2-ol (**2m**)

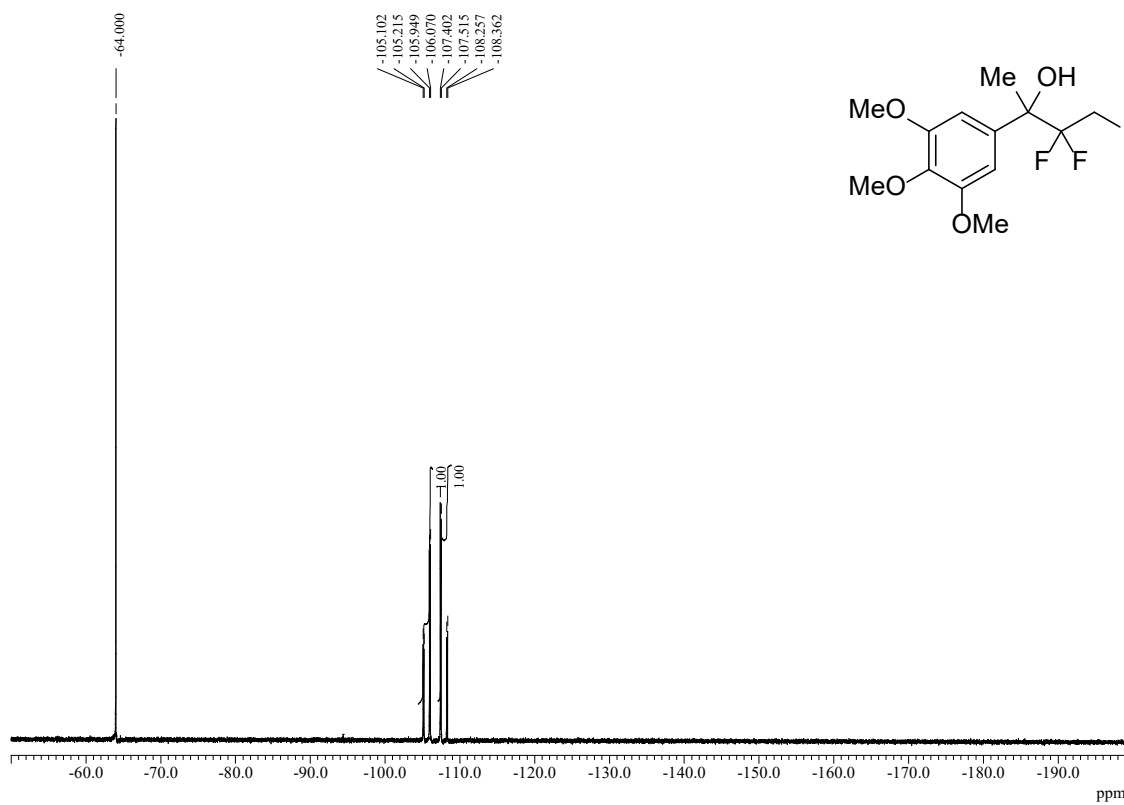

$^1\text{H}$  and  $^{13}\text{C}$  NMR spectra of 3,3-difluoro-4-iodo-2-phenylbutan-2-ol (**2n**)

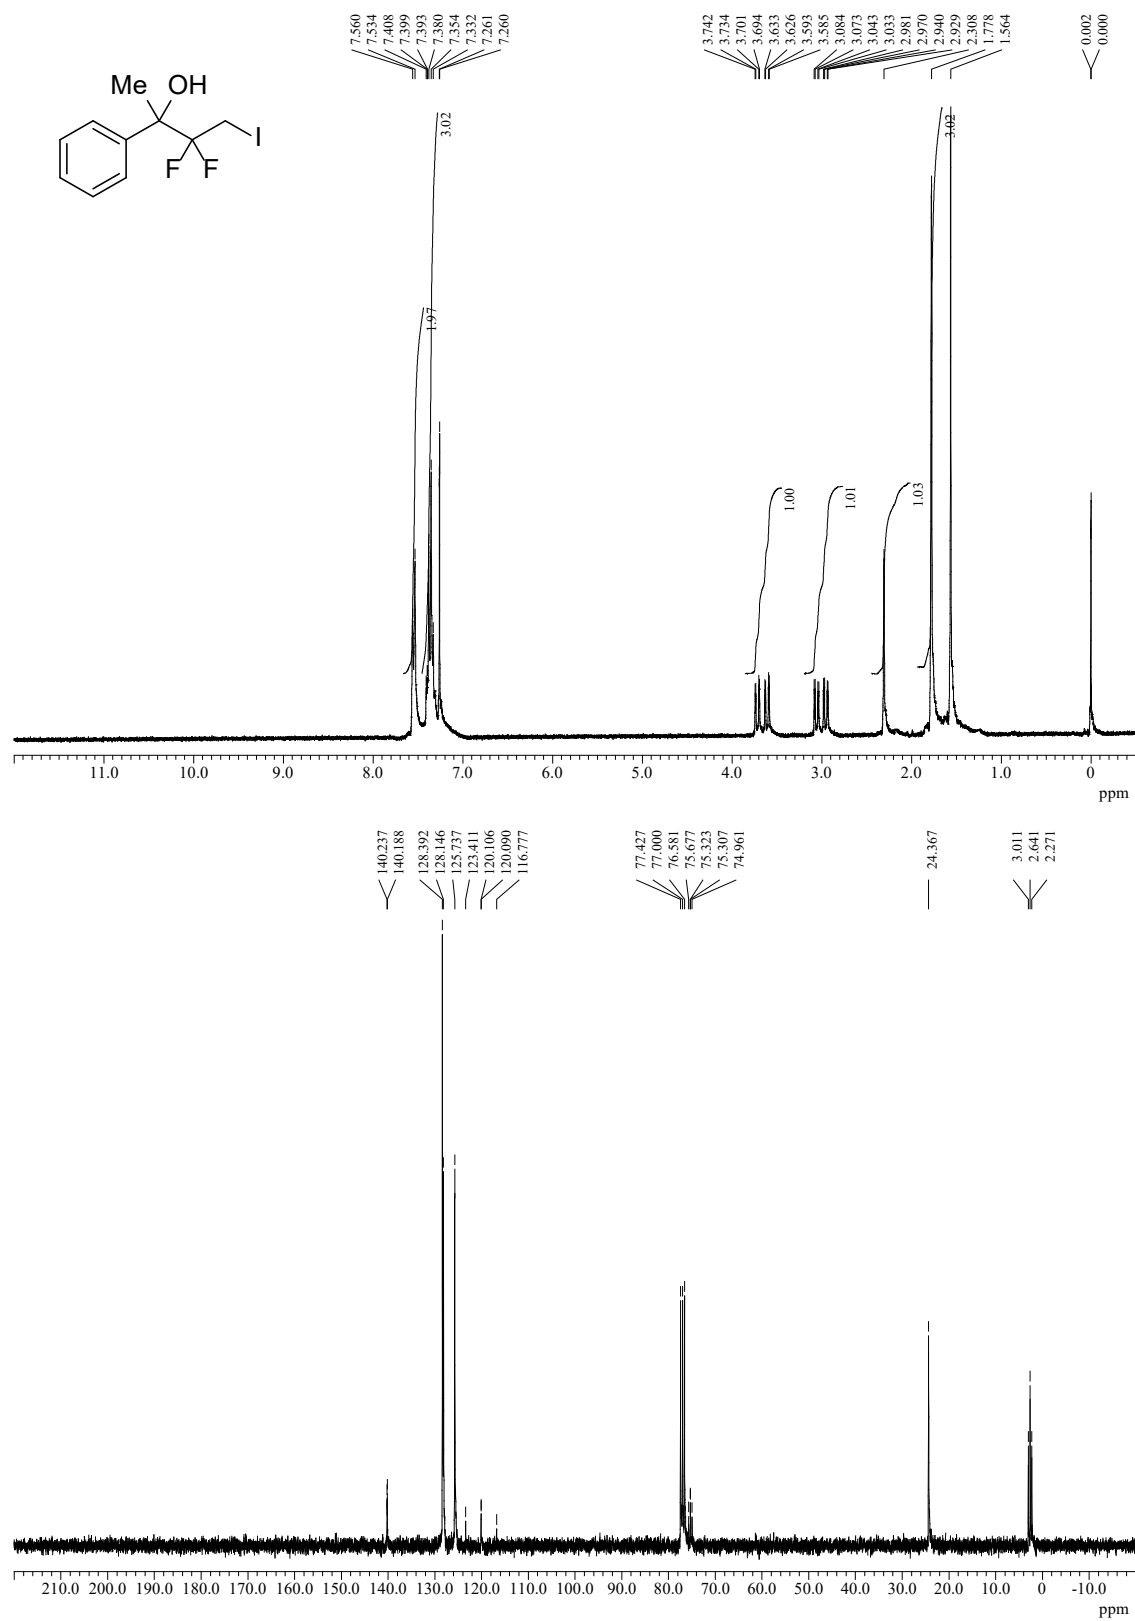

$^{19}\text{F}$  NMR spectrum of 3,3-difluoro-4-iodo-2-phenylbutan-2-ol (**2n**)

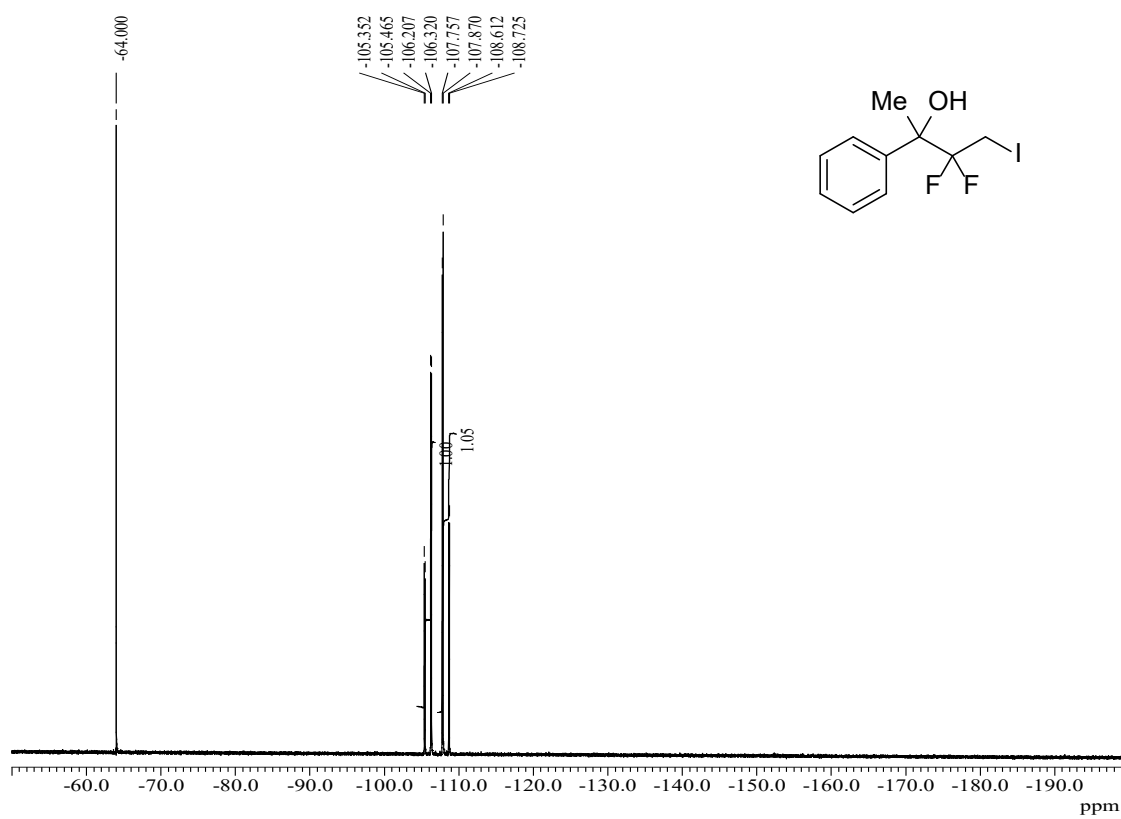

$^1\text{H}$  and  $^{13}\text{C}$  NMR spectra of 2-(4-bromophenyl)-3,3-difluoro-4-iodobutan-2-ol (**2o**)

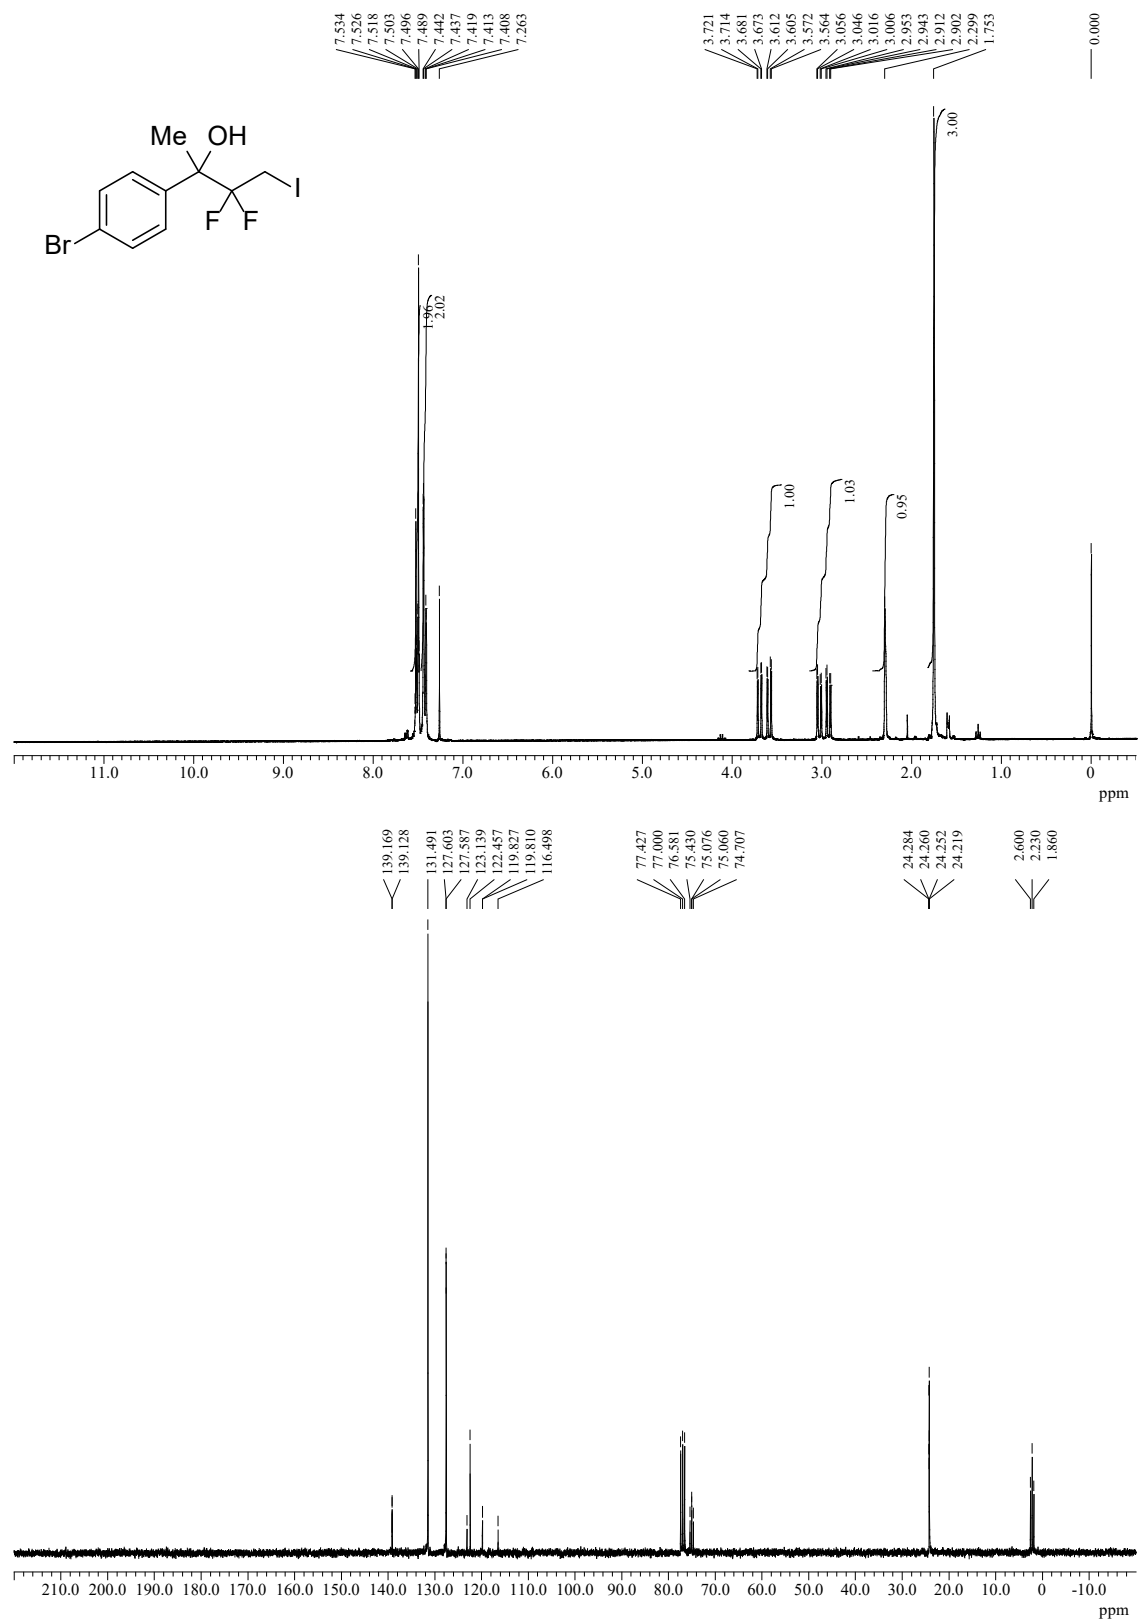

$^{19}\text{F}$  NMR spectrum of 2-(4-bromophenyl)-3,3-difluoro-4-iodobutan-2-ol (**2o**)

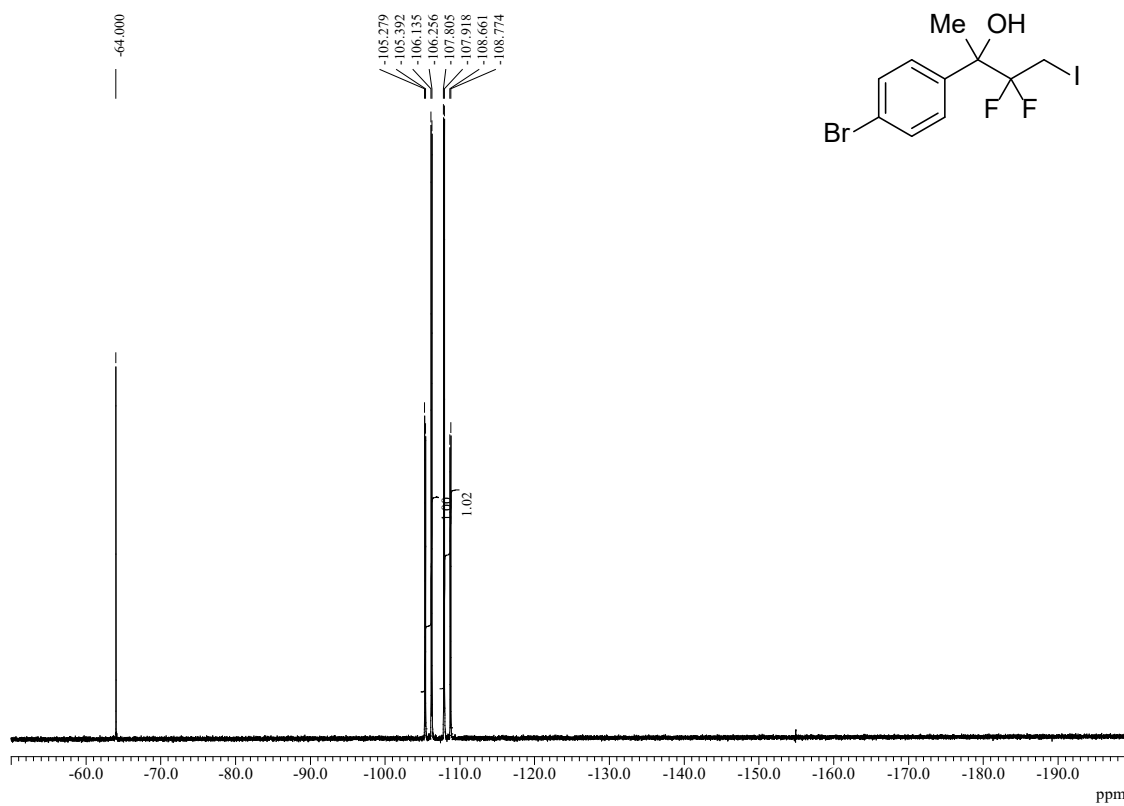

$^1\text{H}$  and  $^{13}\text{C}$  NMR spectra of 3,3-difluoro-4-iodo-2-(4-nitrophenyl)-butan-2-ol (**2p**)

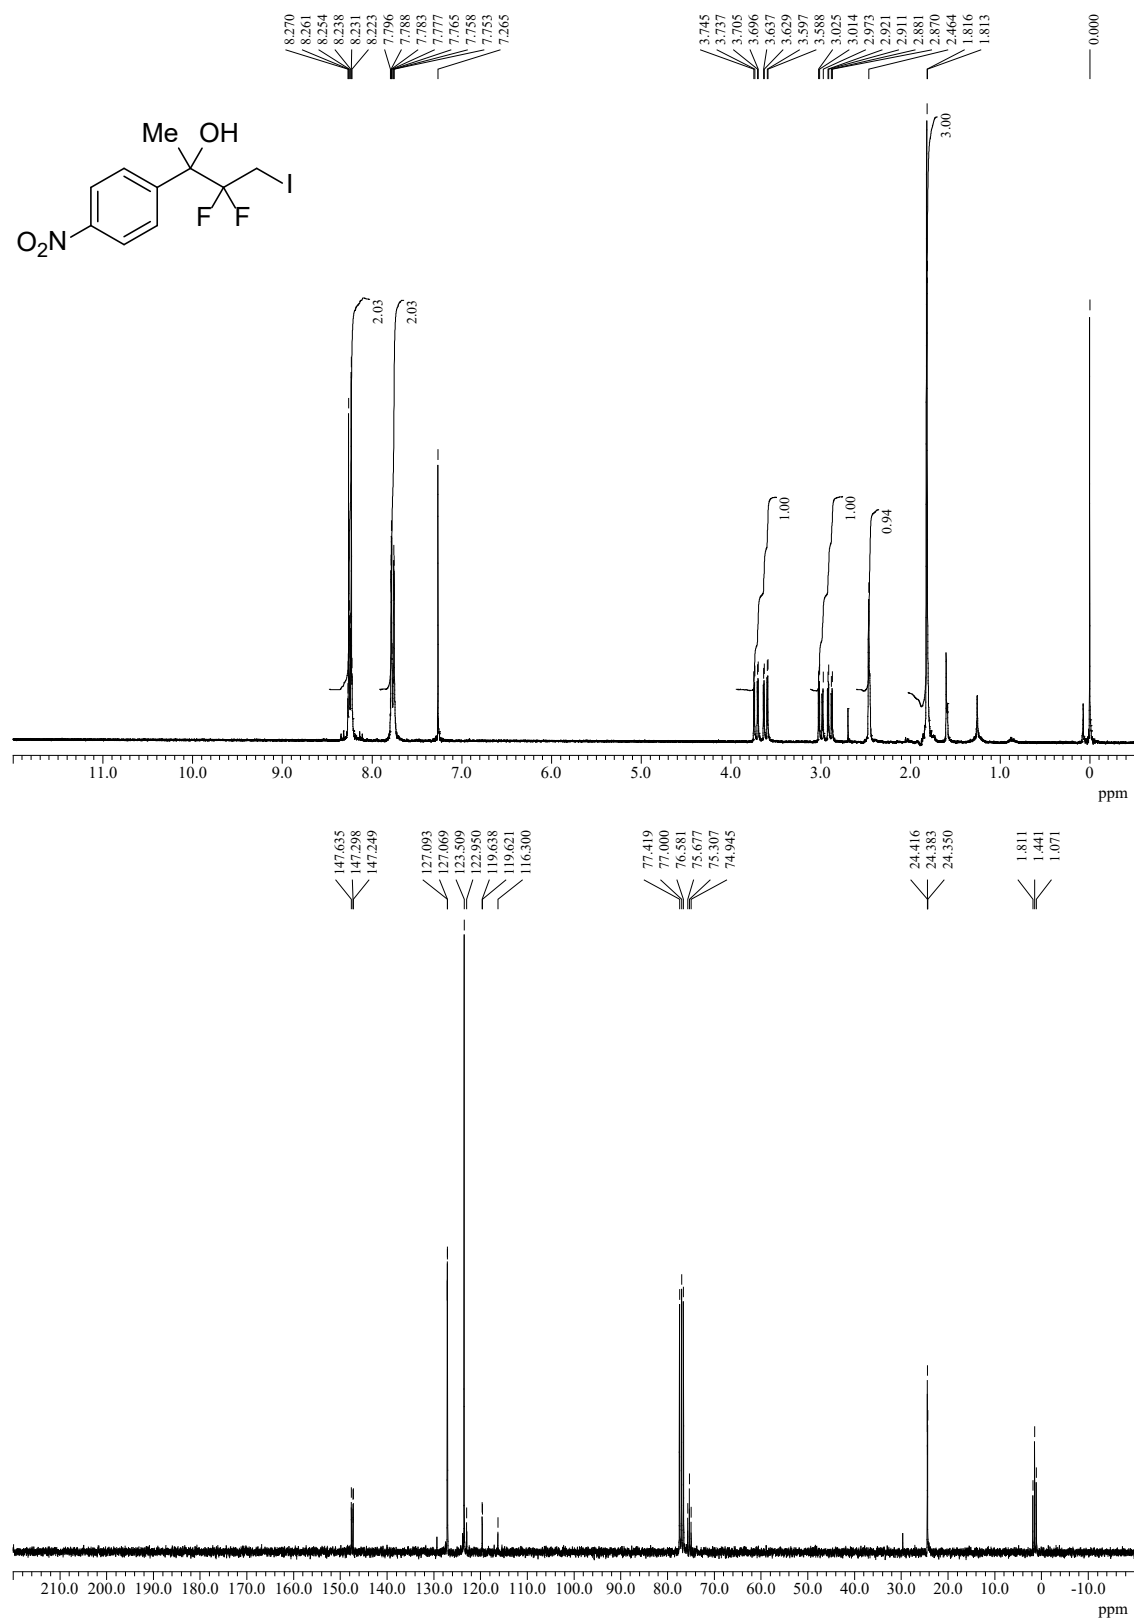



$^{19}\text{F}$  NMR spectrum of 3,3-difluoro-4-iodo-2-(4-nitrophenyl)-butan-2-ol (**2p**)

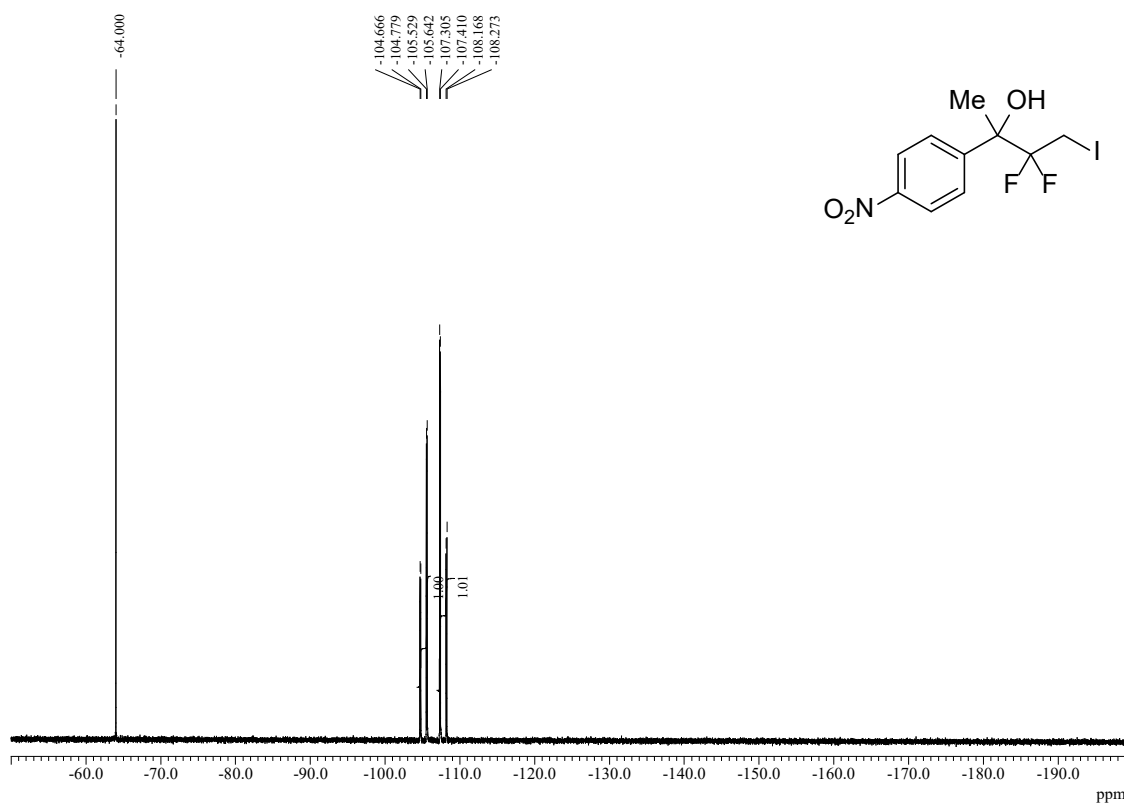

$^1\text{H}$  and  $^{13}\text{C}$  NMR spectra of 2,2-difluoro-3-iodo-1,1-diphenylpropan-1-ol (**2q**)

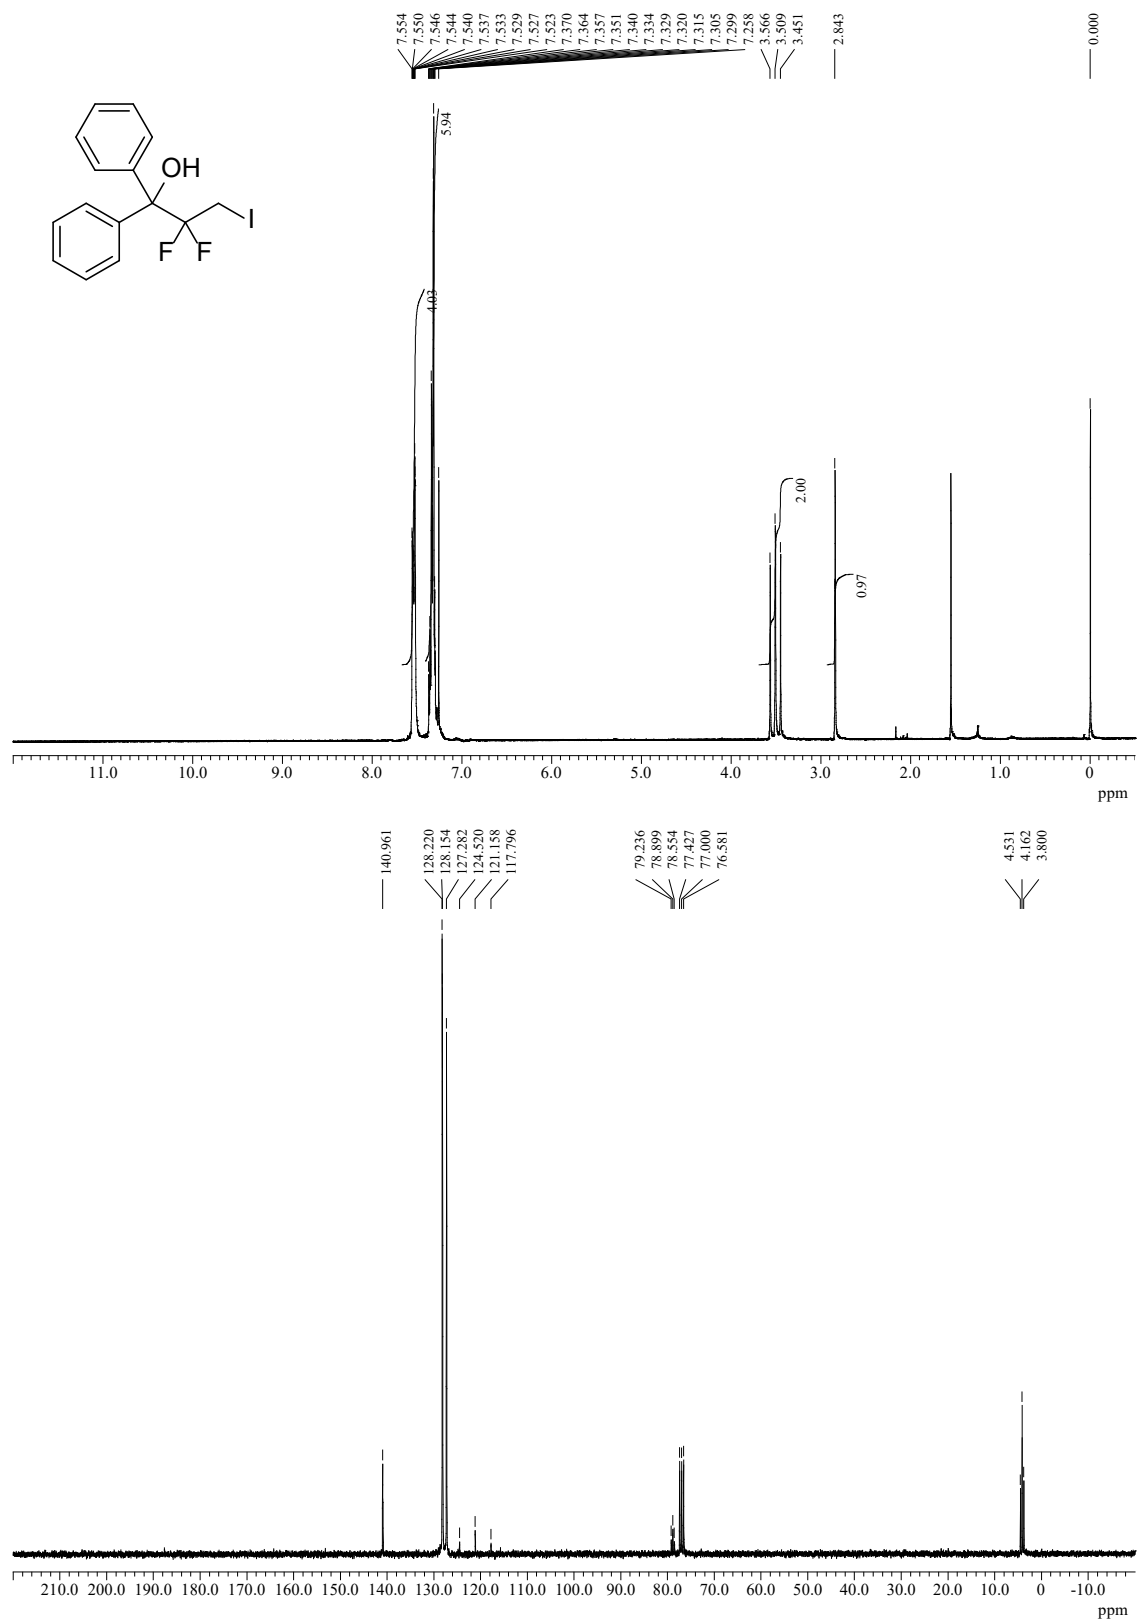

$^{19}\text{F}$  NMR spectrum of 2,2-difluoro-3-iodo-1,1-diphenylpropan-1-ol (**2q**)

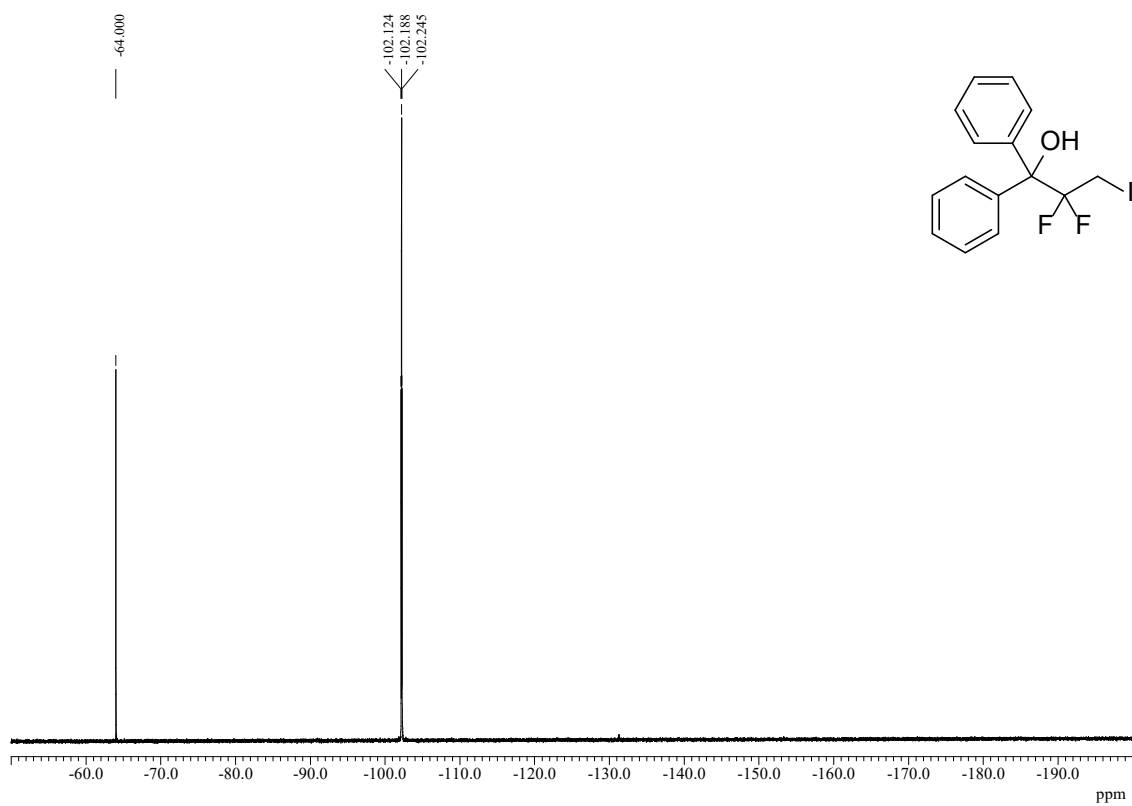

$^1\text{H}$  and  $^{13}\text{C}$  NMR spectra of (*E*)-4,4-difluoro-5-iodo-3-methyl-1-phenylpent-1-en-3-ol (**2r**)

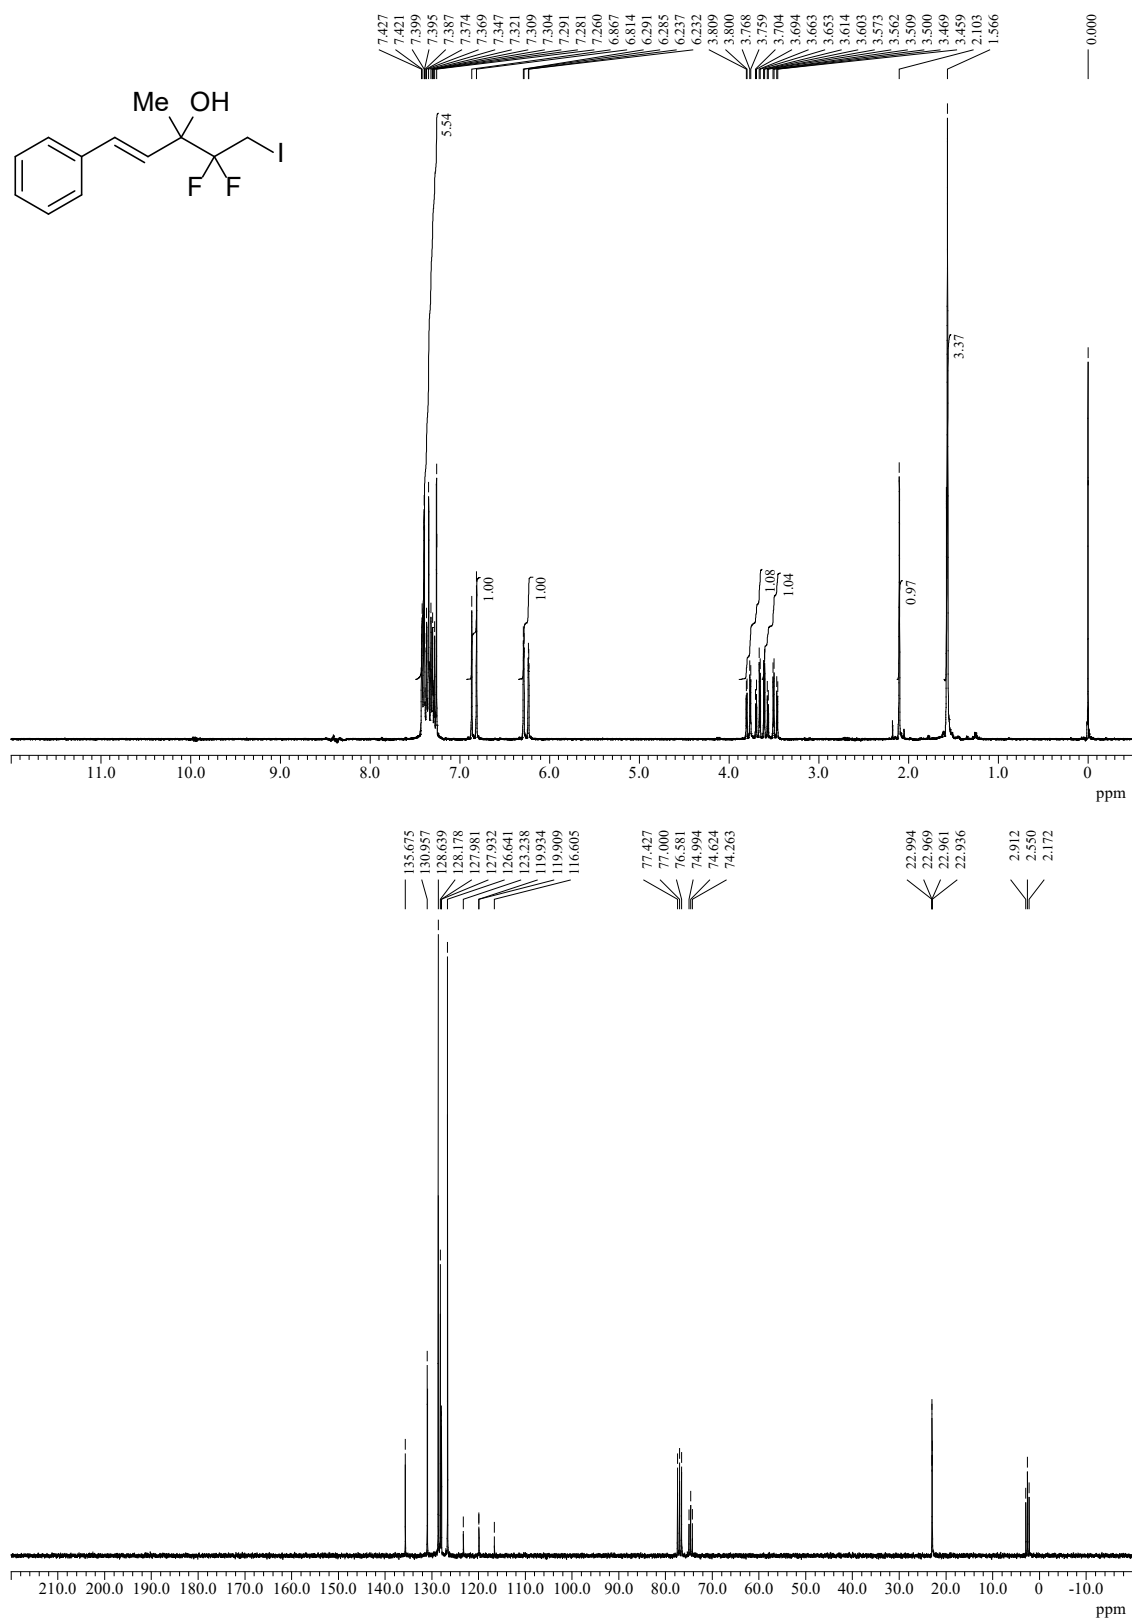

$^{19}\text{F}$  NMR spectrum of (*E*)-4,4-difluoro-5-iodo-3-methyl-1-phenylpent-1-en-3-ol (**2r**)

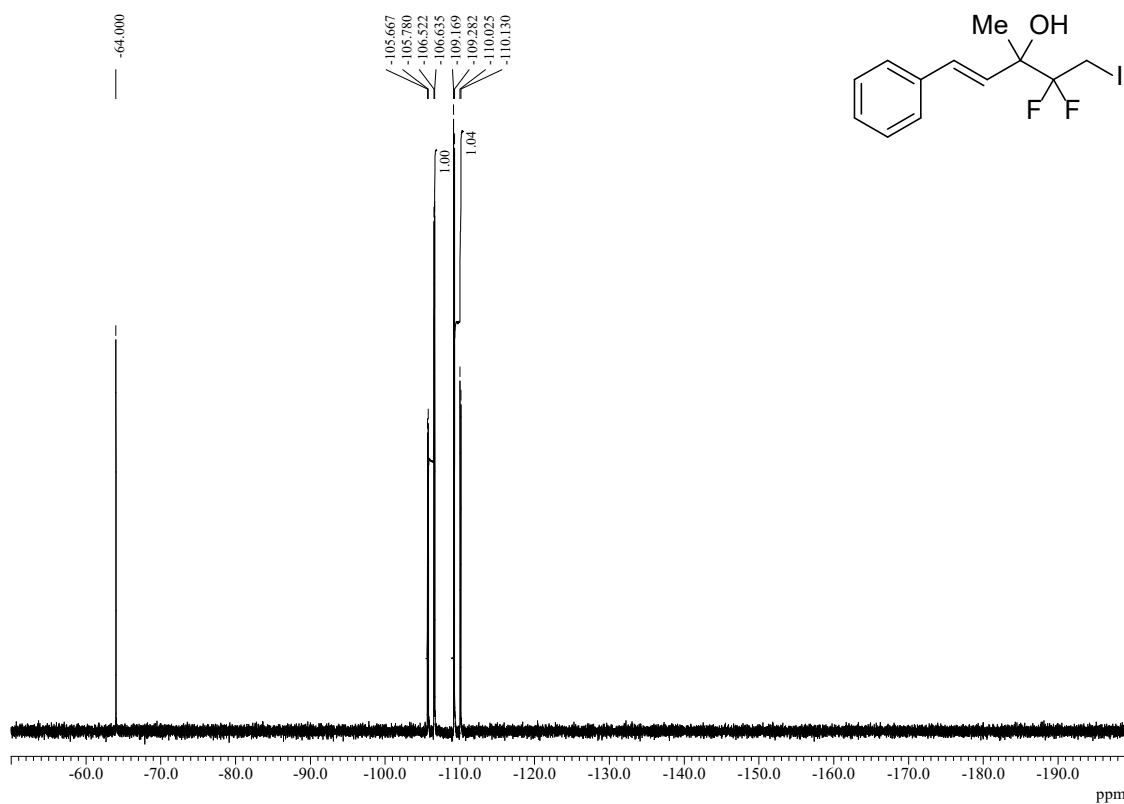

$^1\text{H}$  and  $^{13}\text{C}$  NMR spectra of 2,2-difluoro-3-iodo-1-(4-methoxyphenyl)butan-1-ol (major-2s)

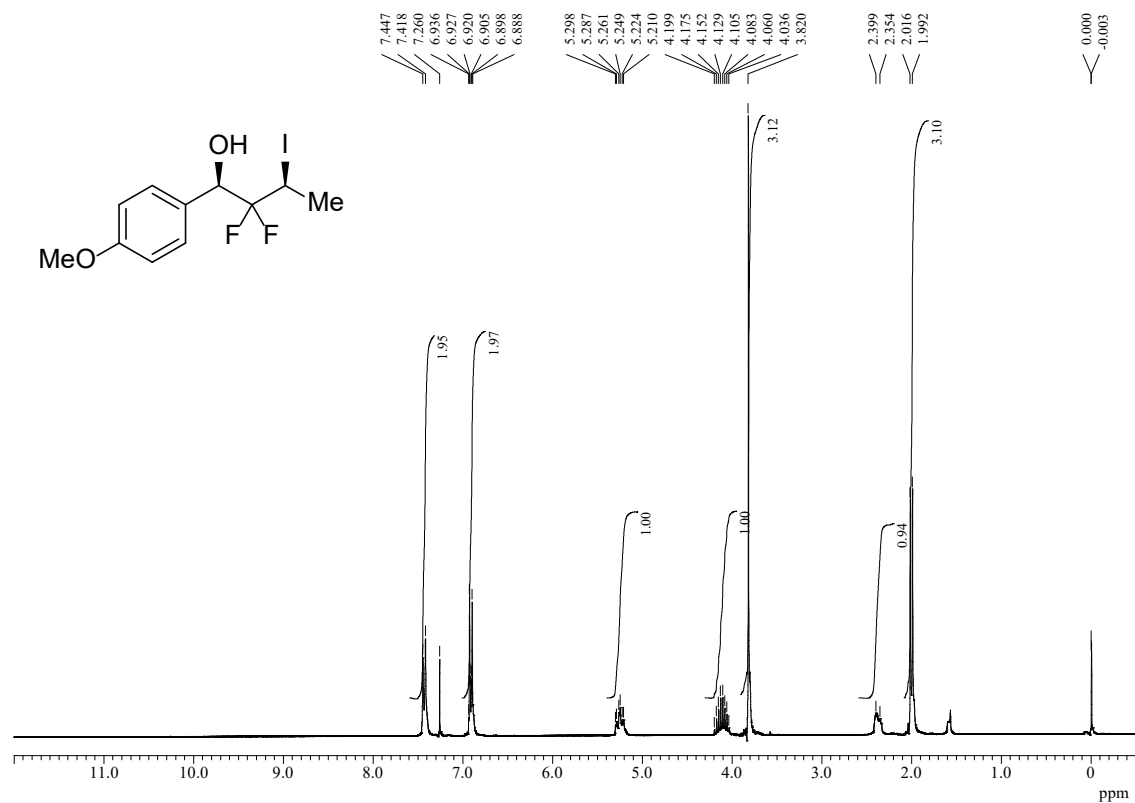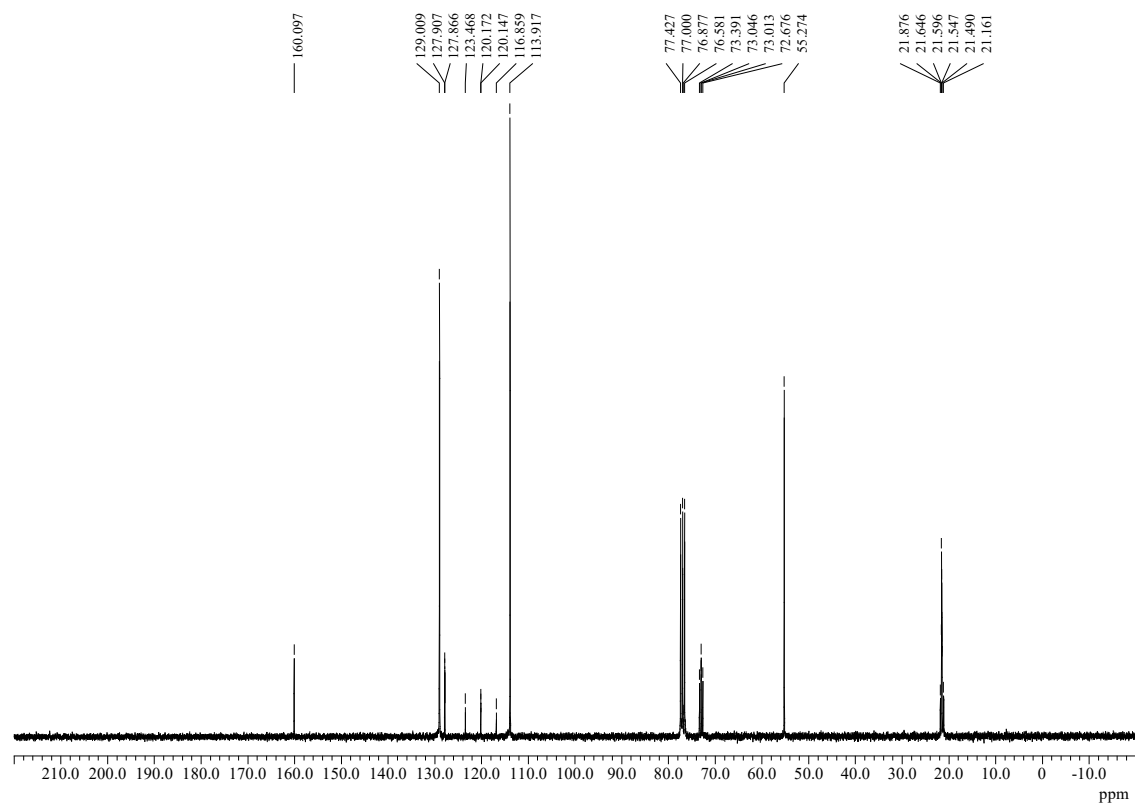

$^{19}\text{F}$  NMR spectrum of 2,2-difluoro-3-iodo-1-(4-methoxyphenyl)butan-1-ol (major-2s)

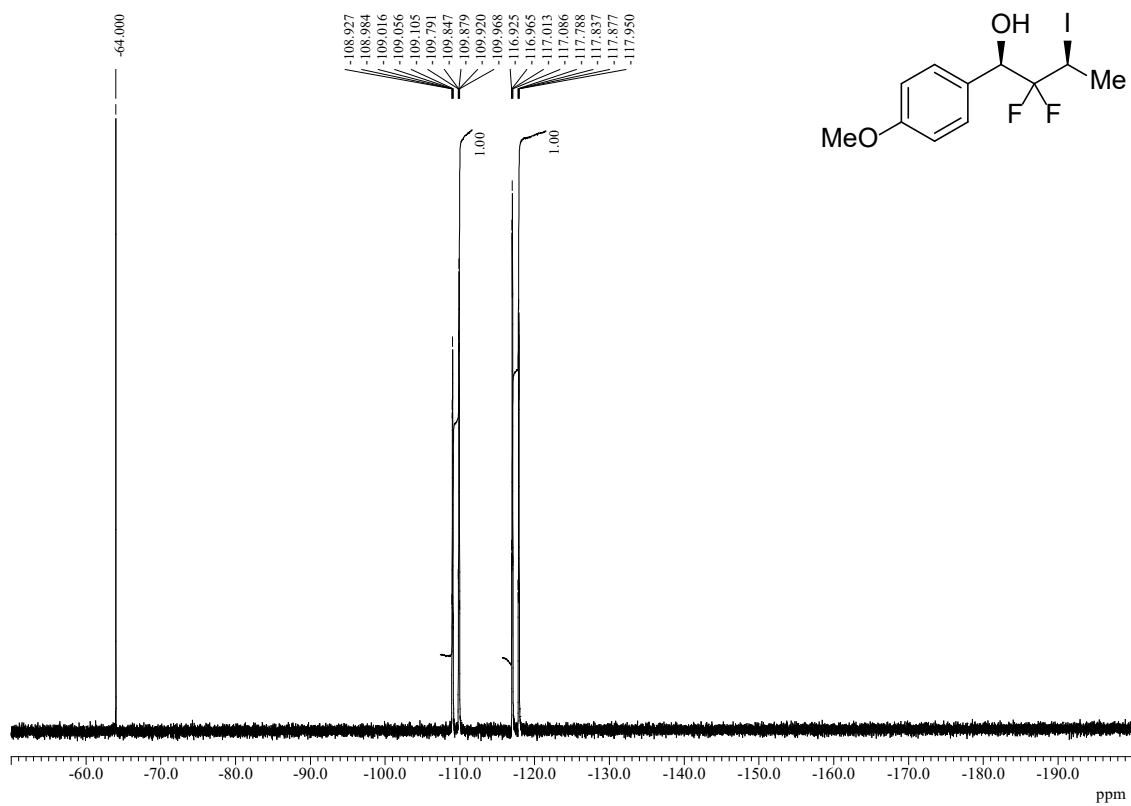

<sup>1</sup>H and <sup>13</sup>C NMR spectra of (1*R*\*,3*R*\*)-2,2-difluoro-3-iodo-1-(4-methoxyphenyl)butan-1-ol (minor-**2s**)

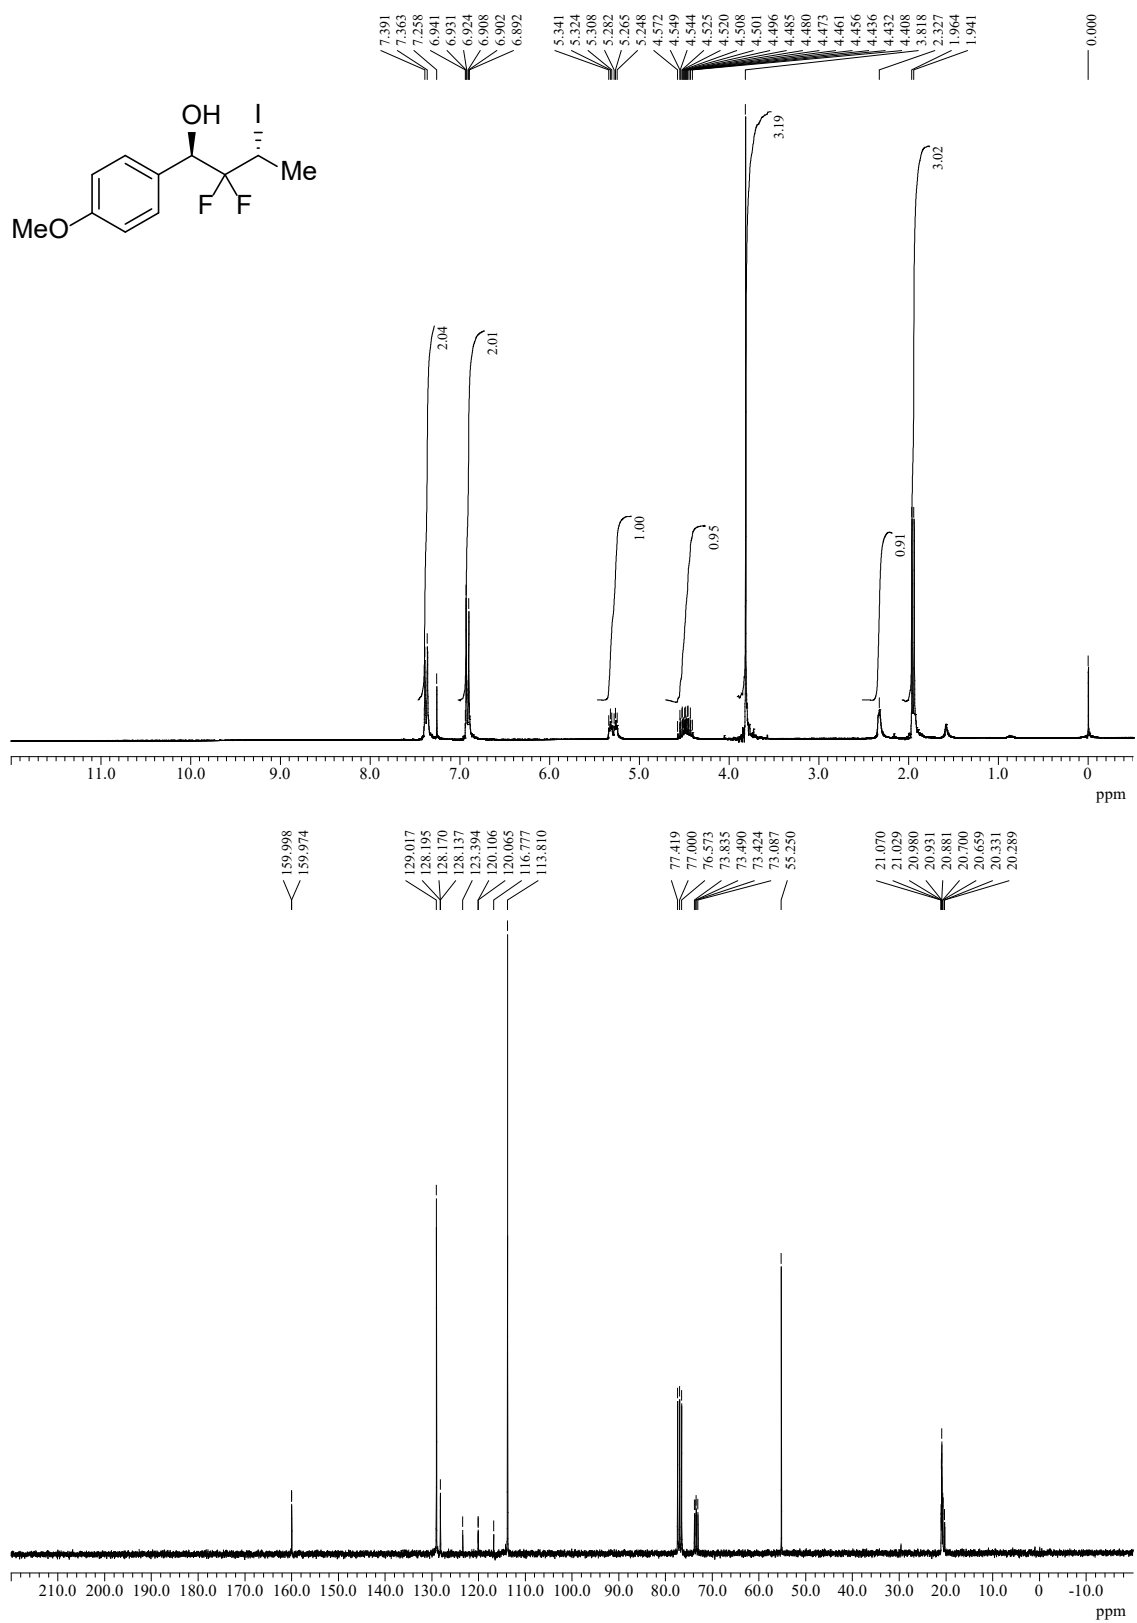



$^{19}\text{F}$  NMR spectrum of (1*R*\*,3*R*\*)-2,2-difluoro-3-iodo-1-(4-methoxyphenyl)butan-1-ol (minor-2s)

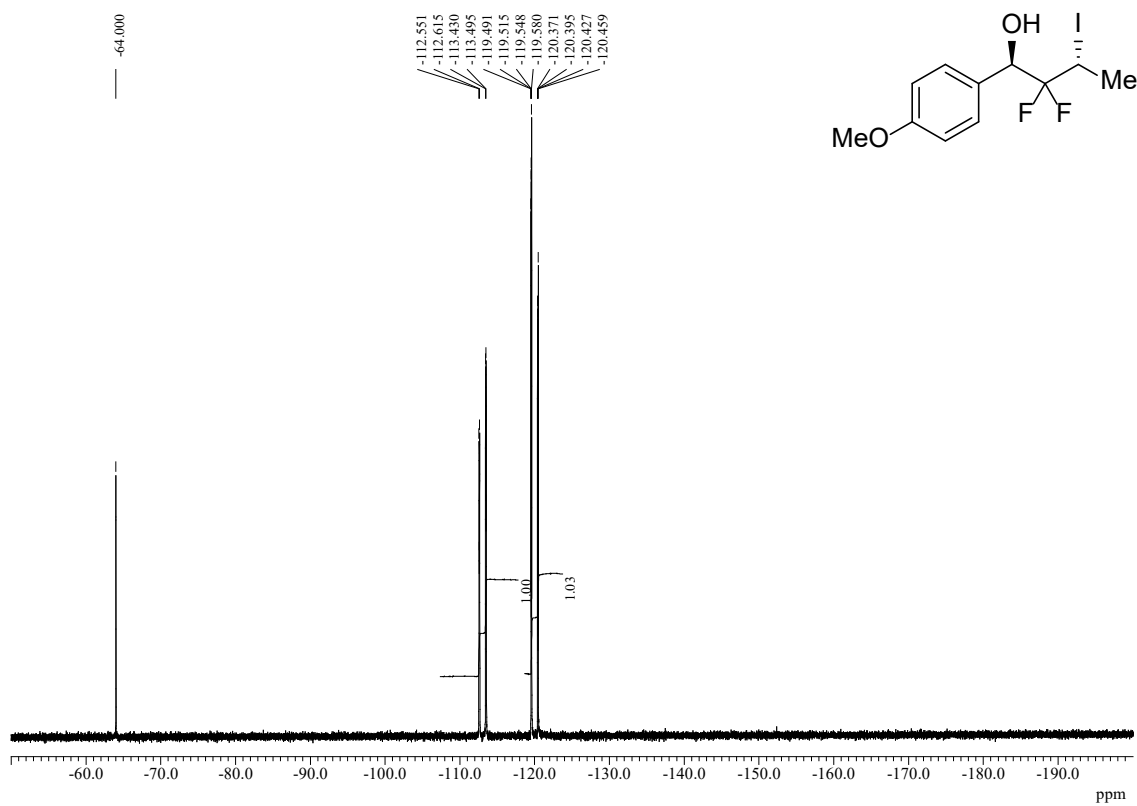

$^1\text{H}$  and  $^{13}\text{C}$  NMR spectra of 2,2-difluoro-1-(4-methoxyphenyl)-3-[(2,2,6,6-tetramethylpiperidin-1-yl)oxy]propan-1-ol (**2a-TEMPO**)

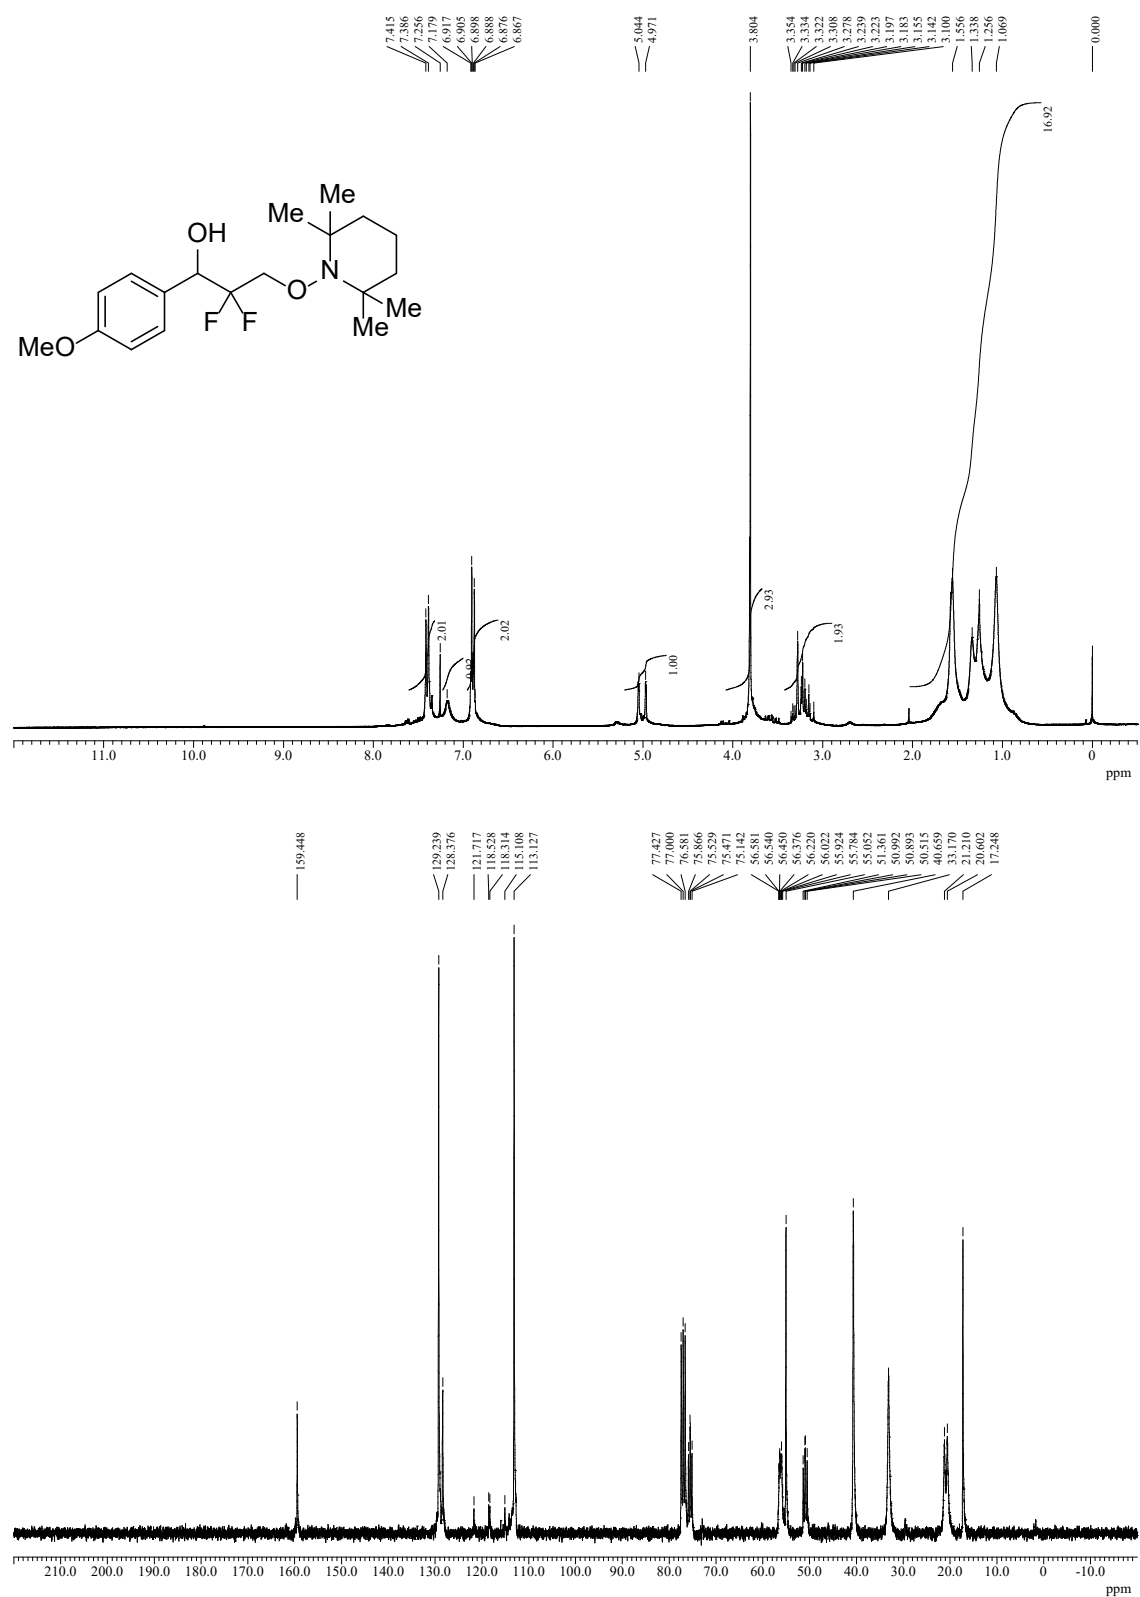

$^{19}\text{F}$  NMR spectrum of 2,2-difluoro-1-(4-methoxyphenyl)-3-[(2,2,6,6-tetramethylpiperidin-1-yl)oxy]propan-1-ol (**2a-TEMPO**)

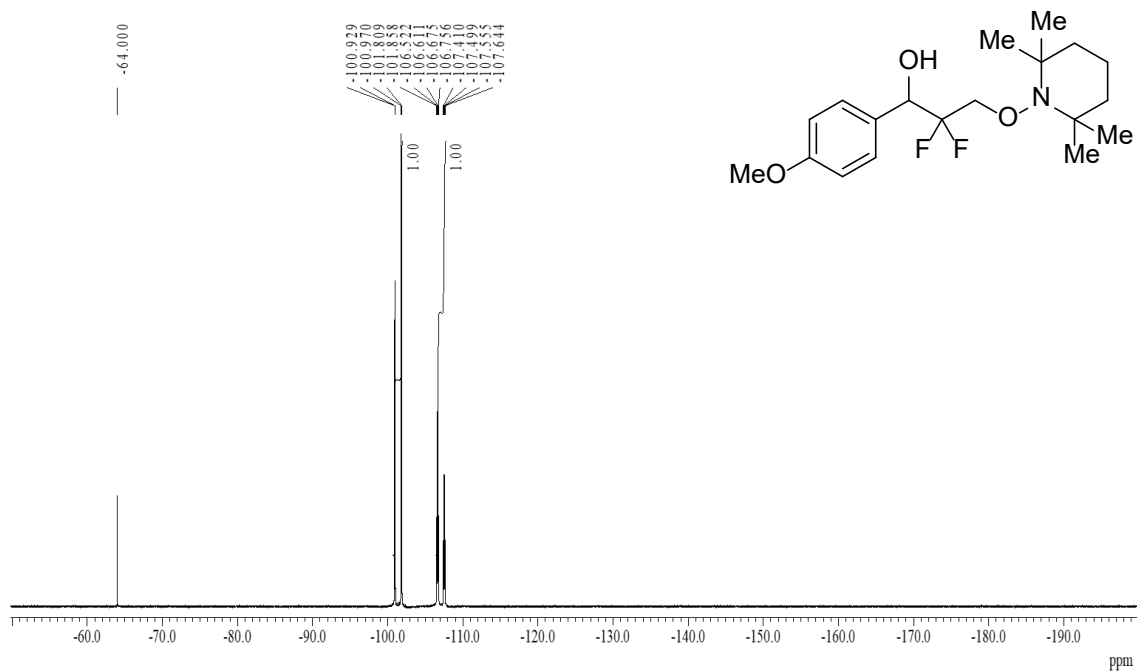

$^1\text{H}$  and  $^{13}\text{C}$  NMR spectra of 1-(2,2-difluoro-1,3-diiodoprop-1-yl)-4-methoxybenzene (**3a**)

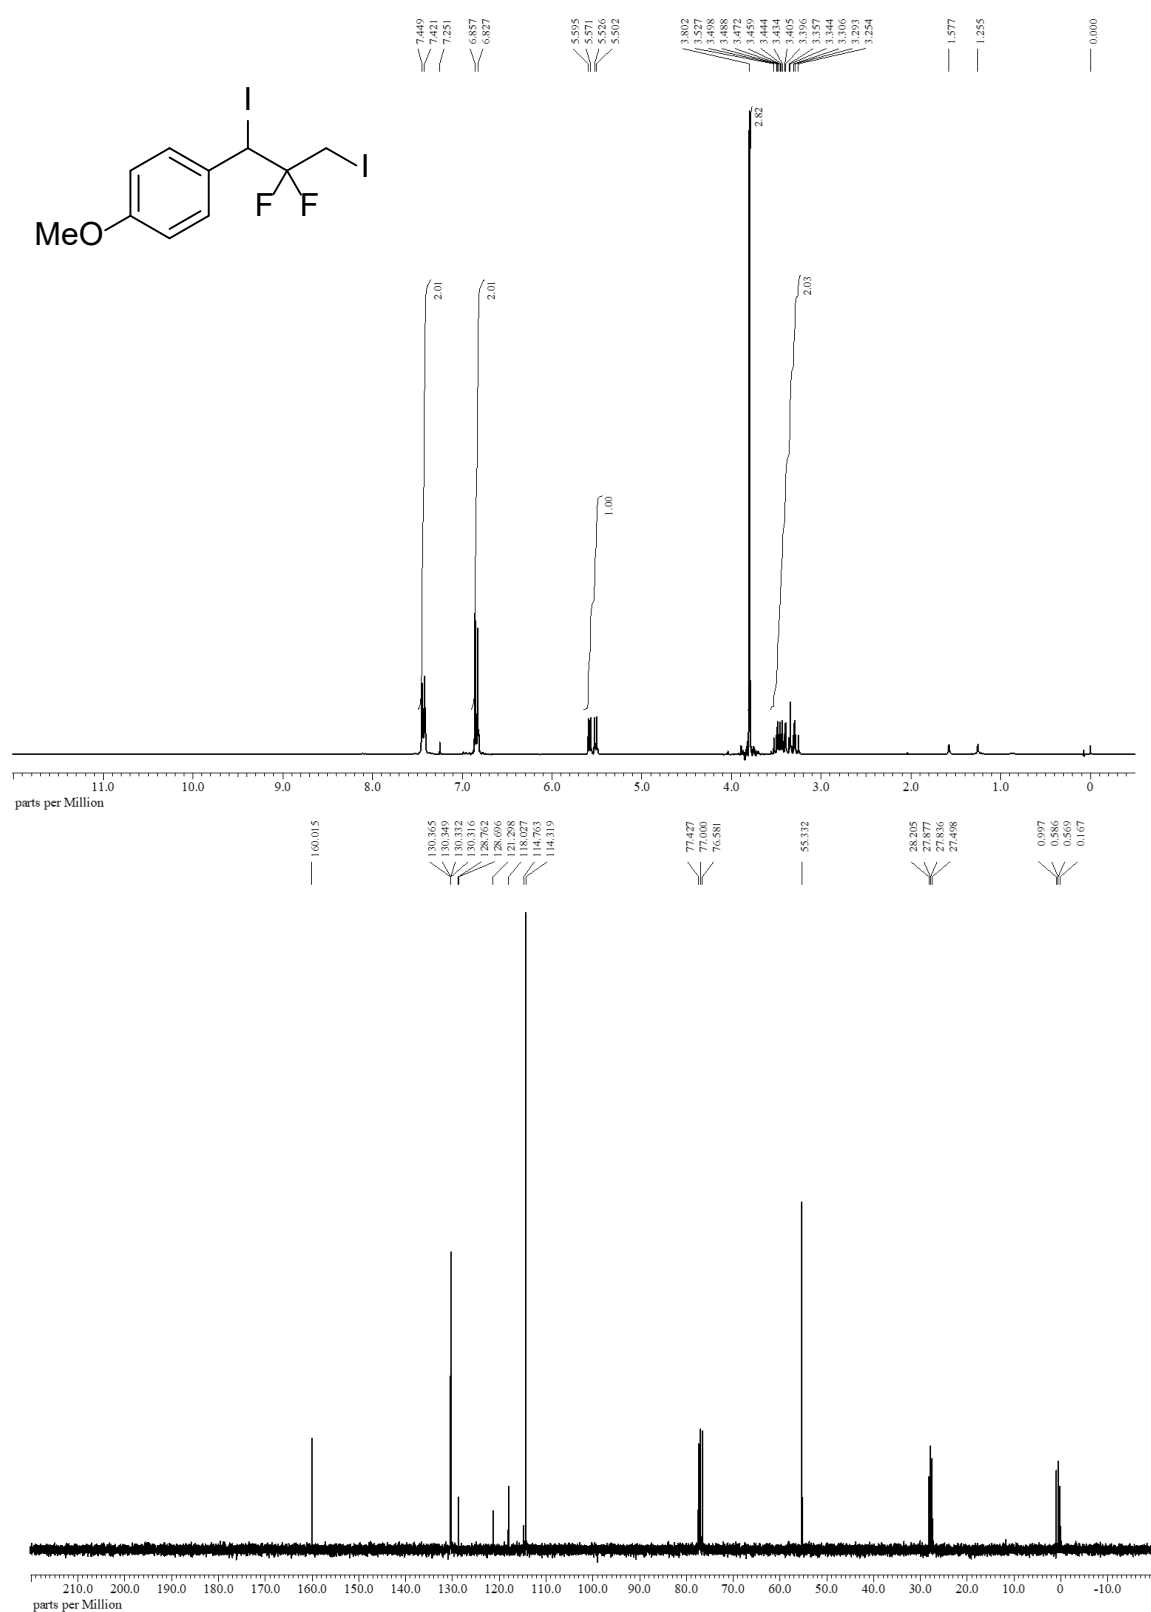

<sup>19</sup>F NMR spectrum of 1-(2,2-difluoro-1,3-diiodoprop-1-yl)-4-methoxybenzene (**3a**)

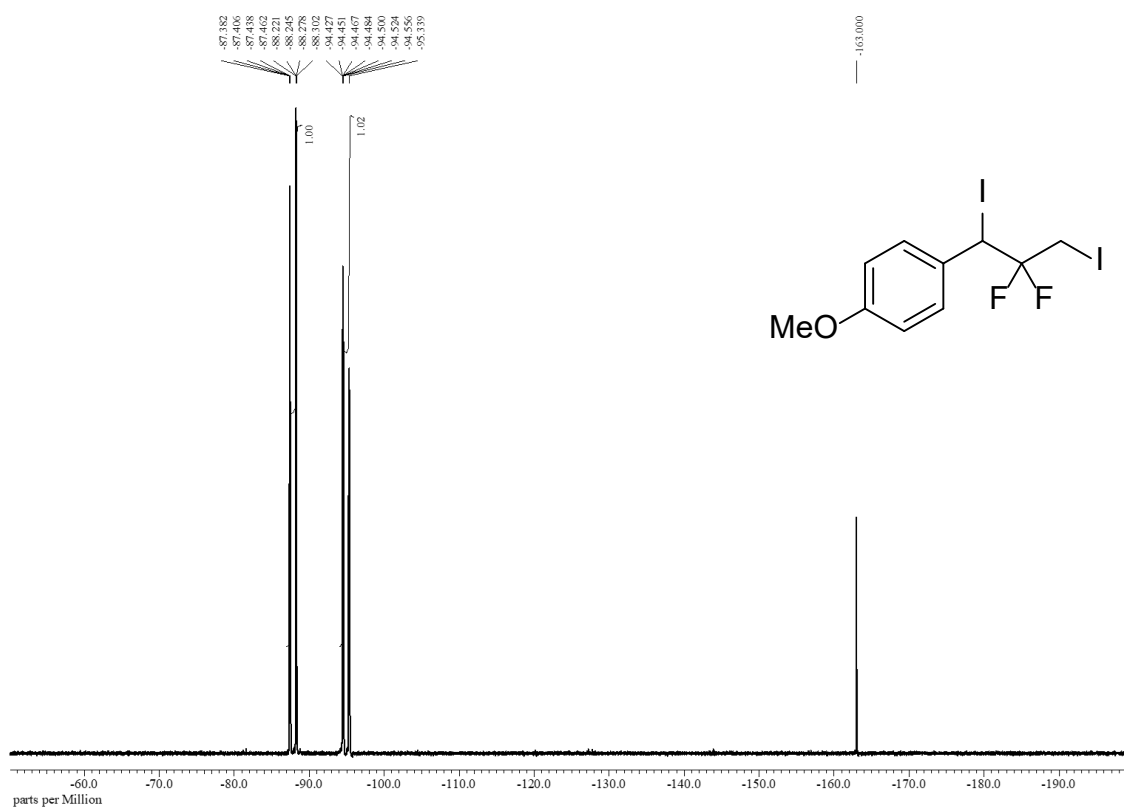

<sup>1</sup>H and <sup>13</sup>C NMR spectra of (2,2-difluoro-1,3-diiodoprop-1-yl)benzene (**3g**)

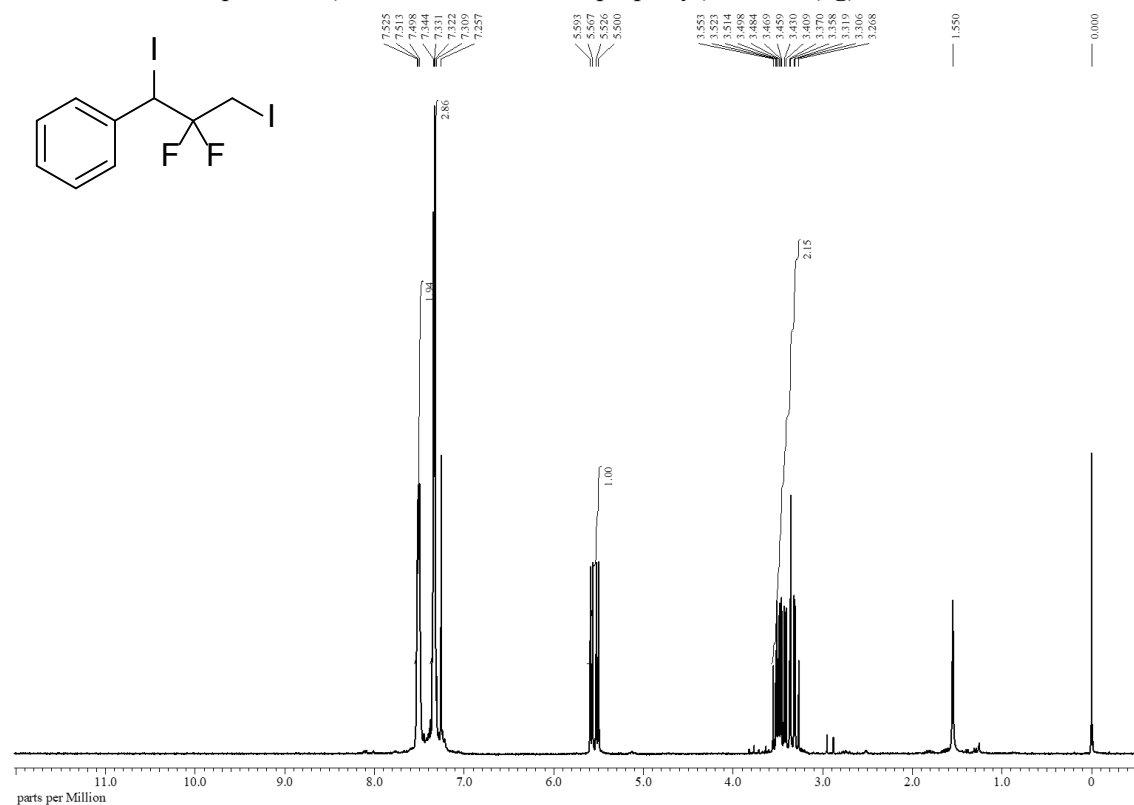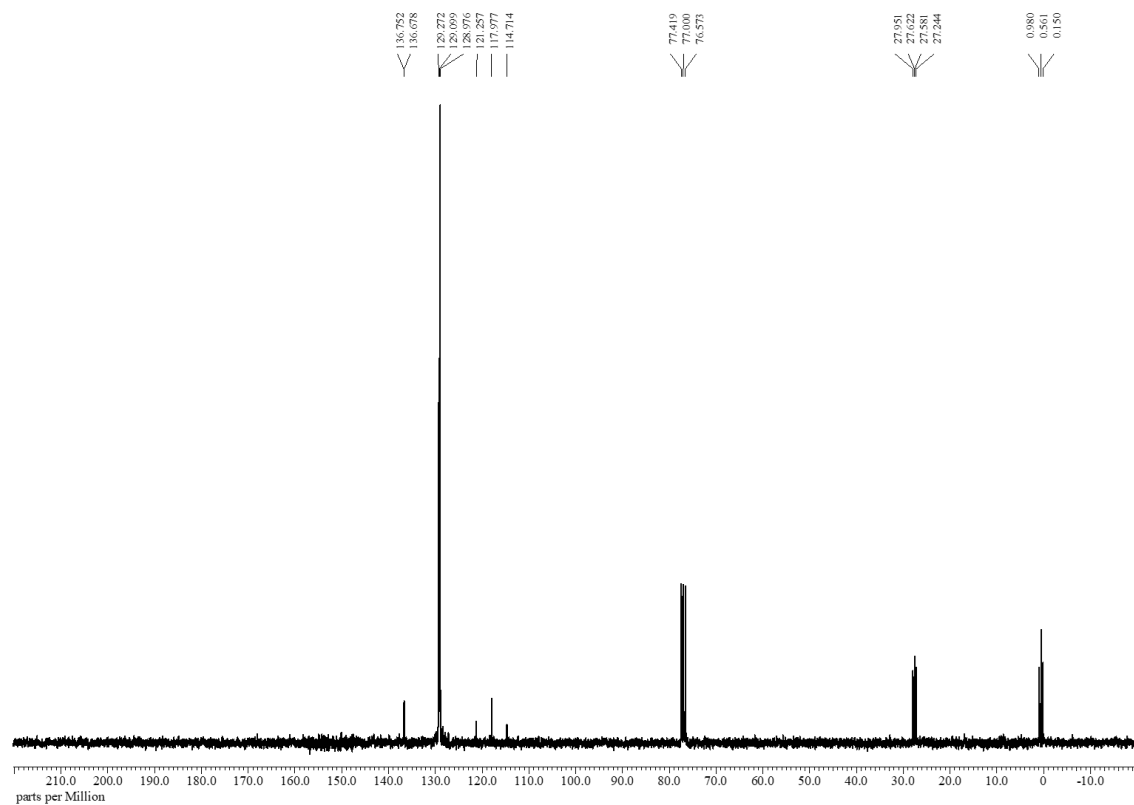

$^{19}\text{F}$  NMR spectrum of (2,2-difluoro-1,3-diiodoprop-1-yl)benzene (**3g**)

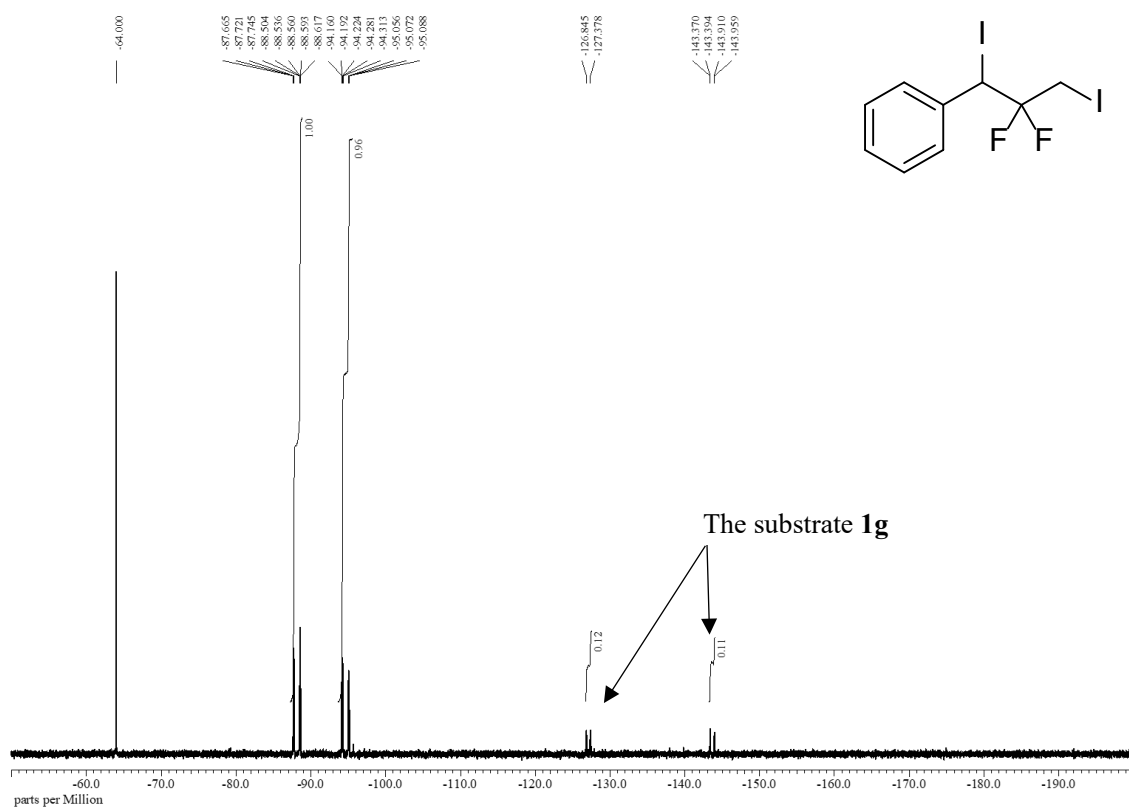

$^1\text{H}$  and  $^{13}\text{C}$  NMR spectra of 1-bromo-4-(2,2-difluoro-1,3-diiodoprop-1-yl)benzene (**3h**)

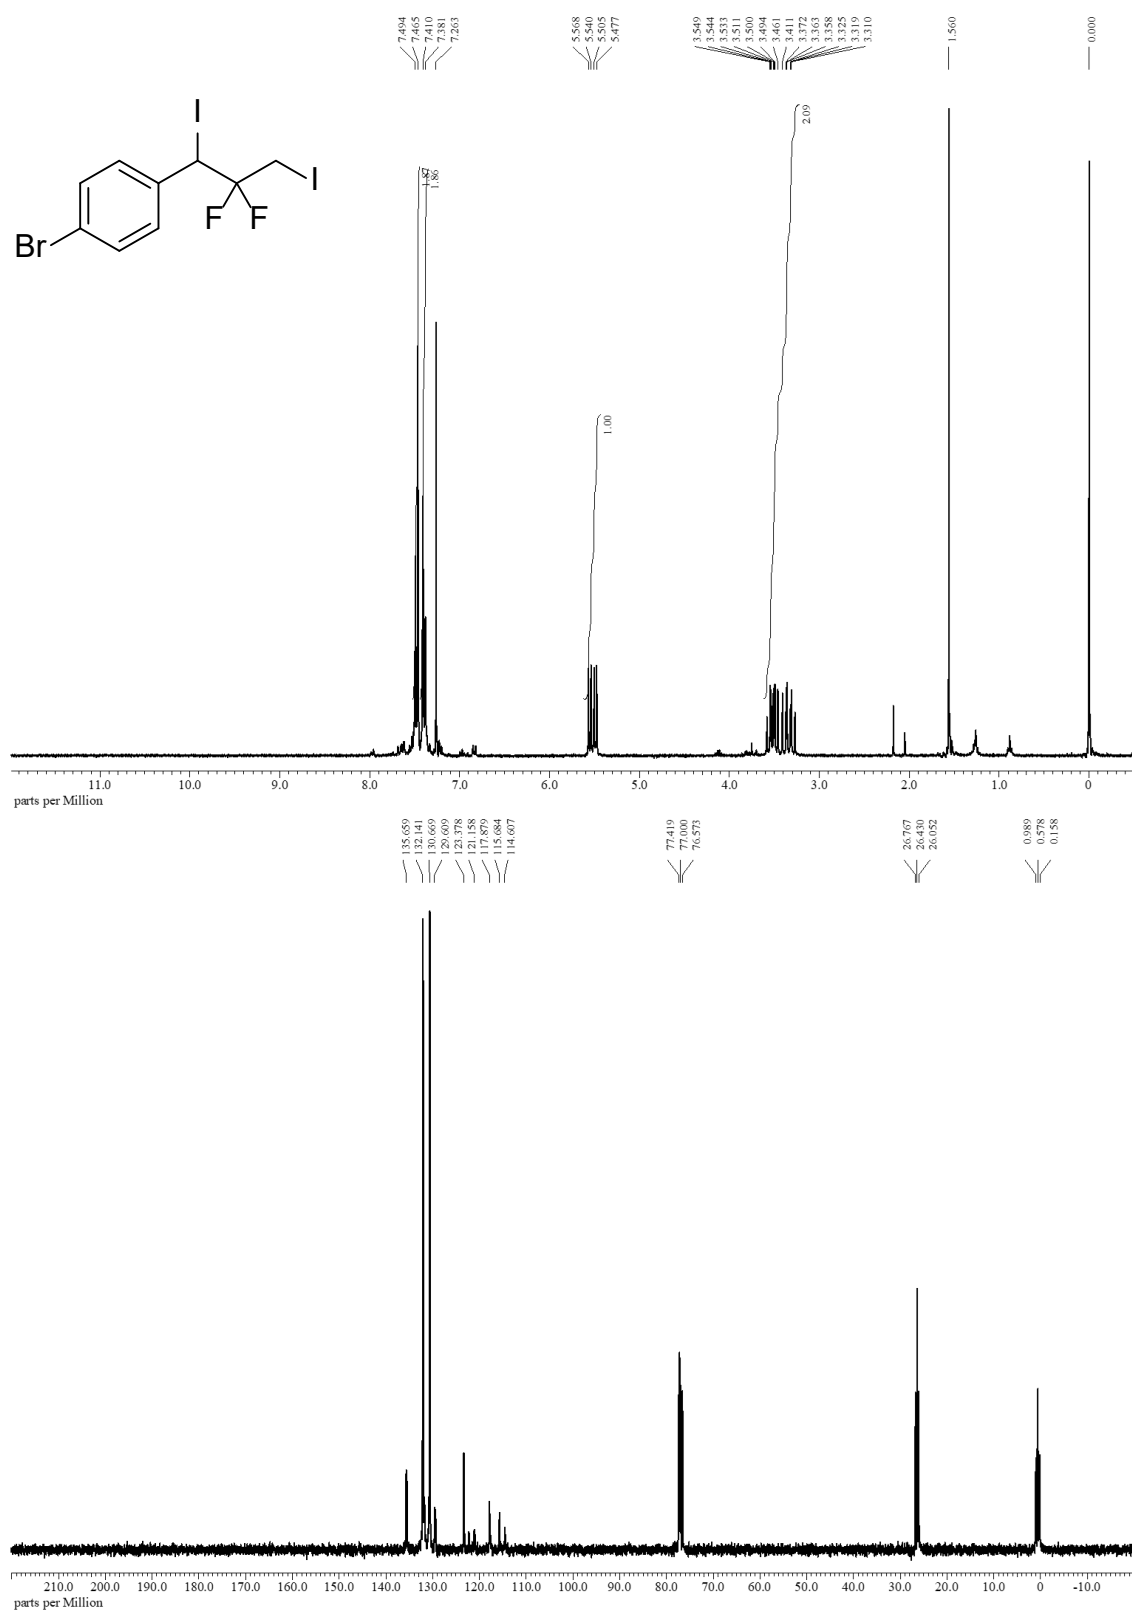



$^{19}\text{F}$  NMR spectrum of 1-bromo-4-(2,2-difluoro-1,3-diiodoprop-1-yl)benzene (**3h**)

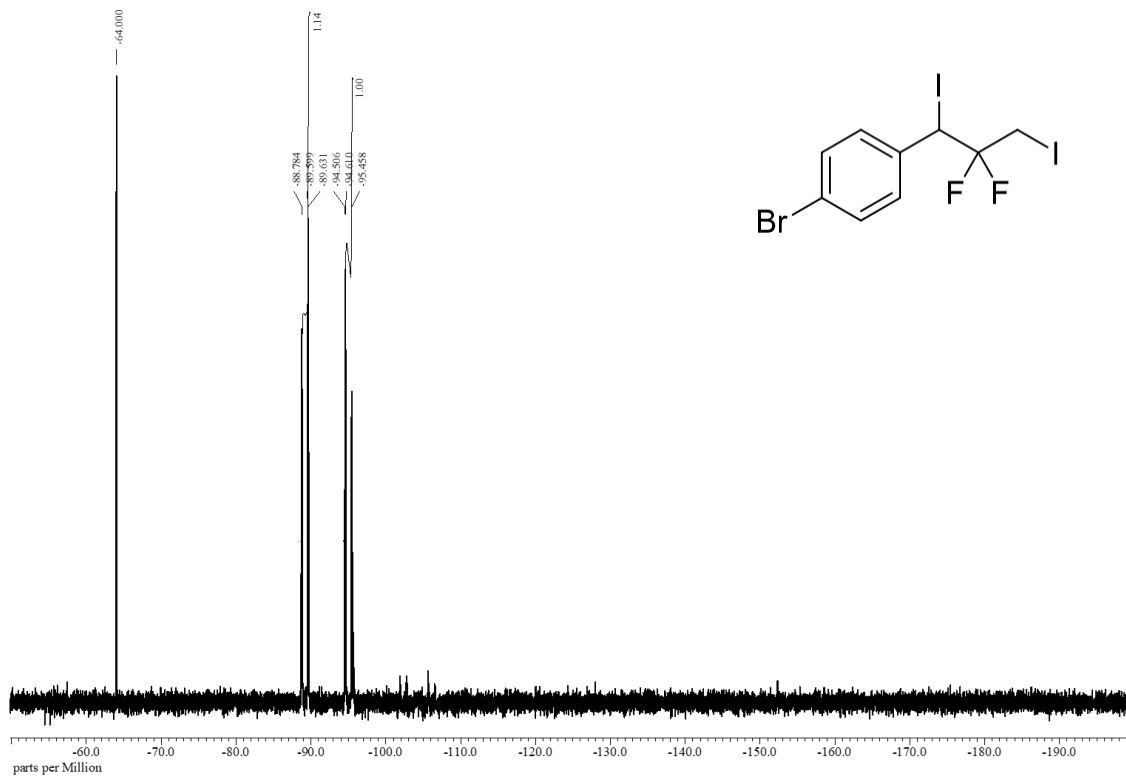

$^1\text{H}$  and  $^{13}\text{C}$  NMR spectra of (3,3-difluoro-4-iodobut-1-en-2-yl)benzene (**4n**)

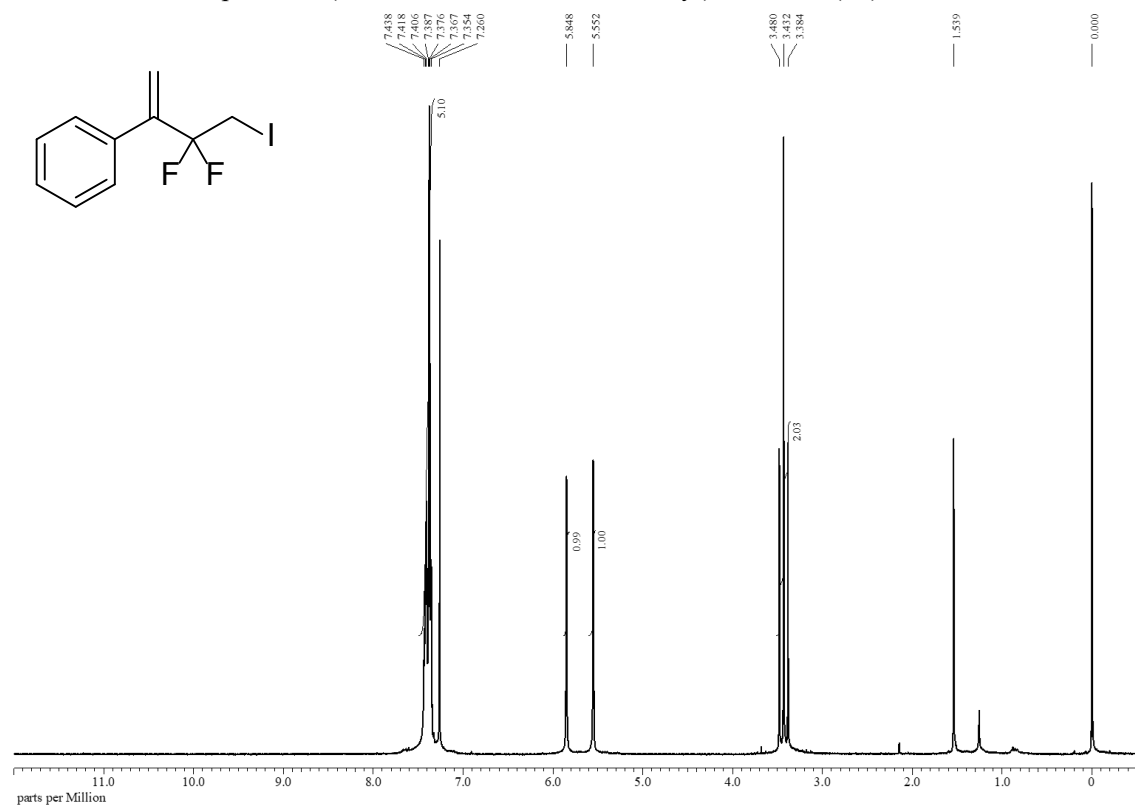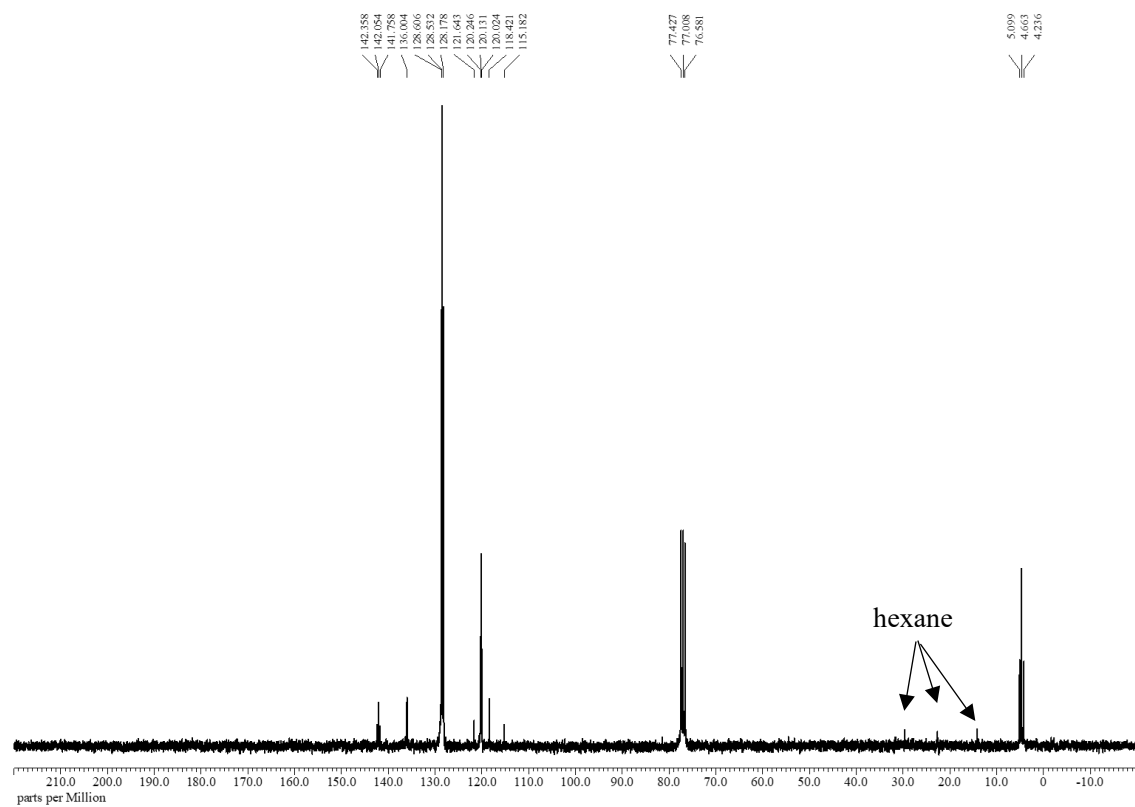

$^{19}\text{F}$  NMR spectrum of (3,3-difluoro-4-iodobut-1-en-2-yl)benzene (**4n**)

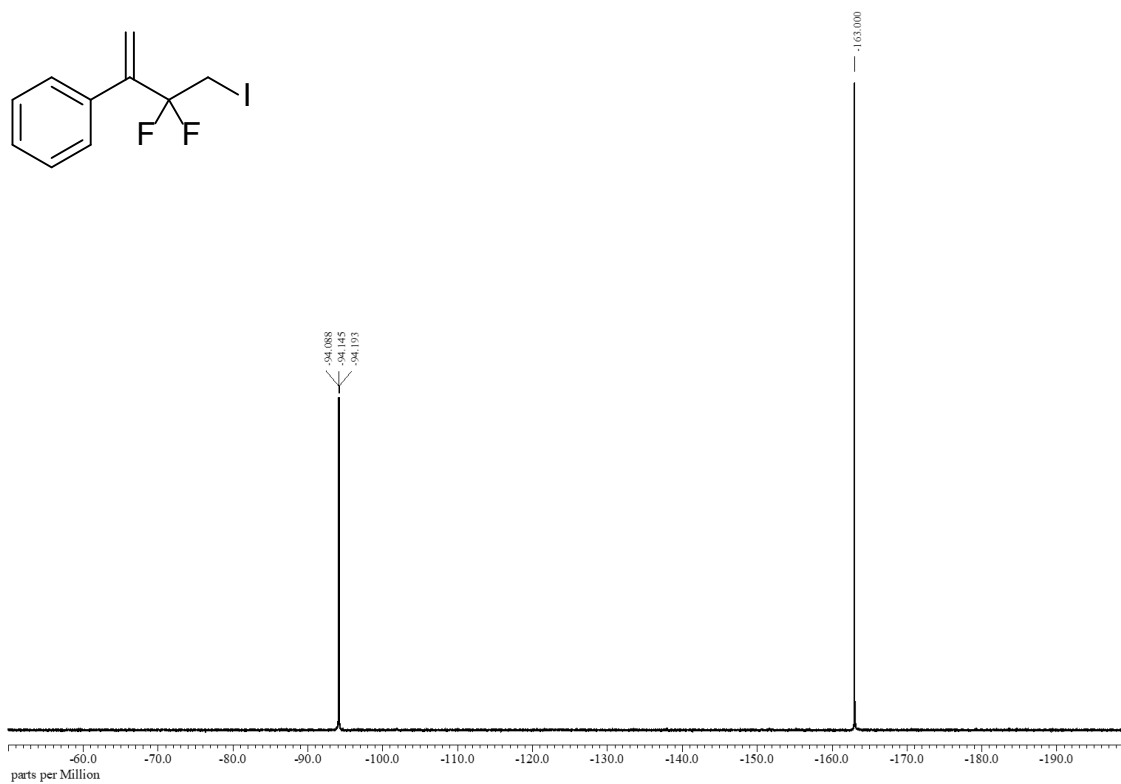

$^1\text{H}$  and  $^{13}\text{C}$  NMR spectra of 1-(2,2-difluoro-3-iodo-1-methoxyprop-1-yl)-4-methoxybenzene (**5aa**)

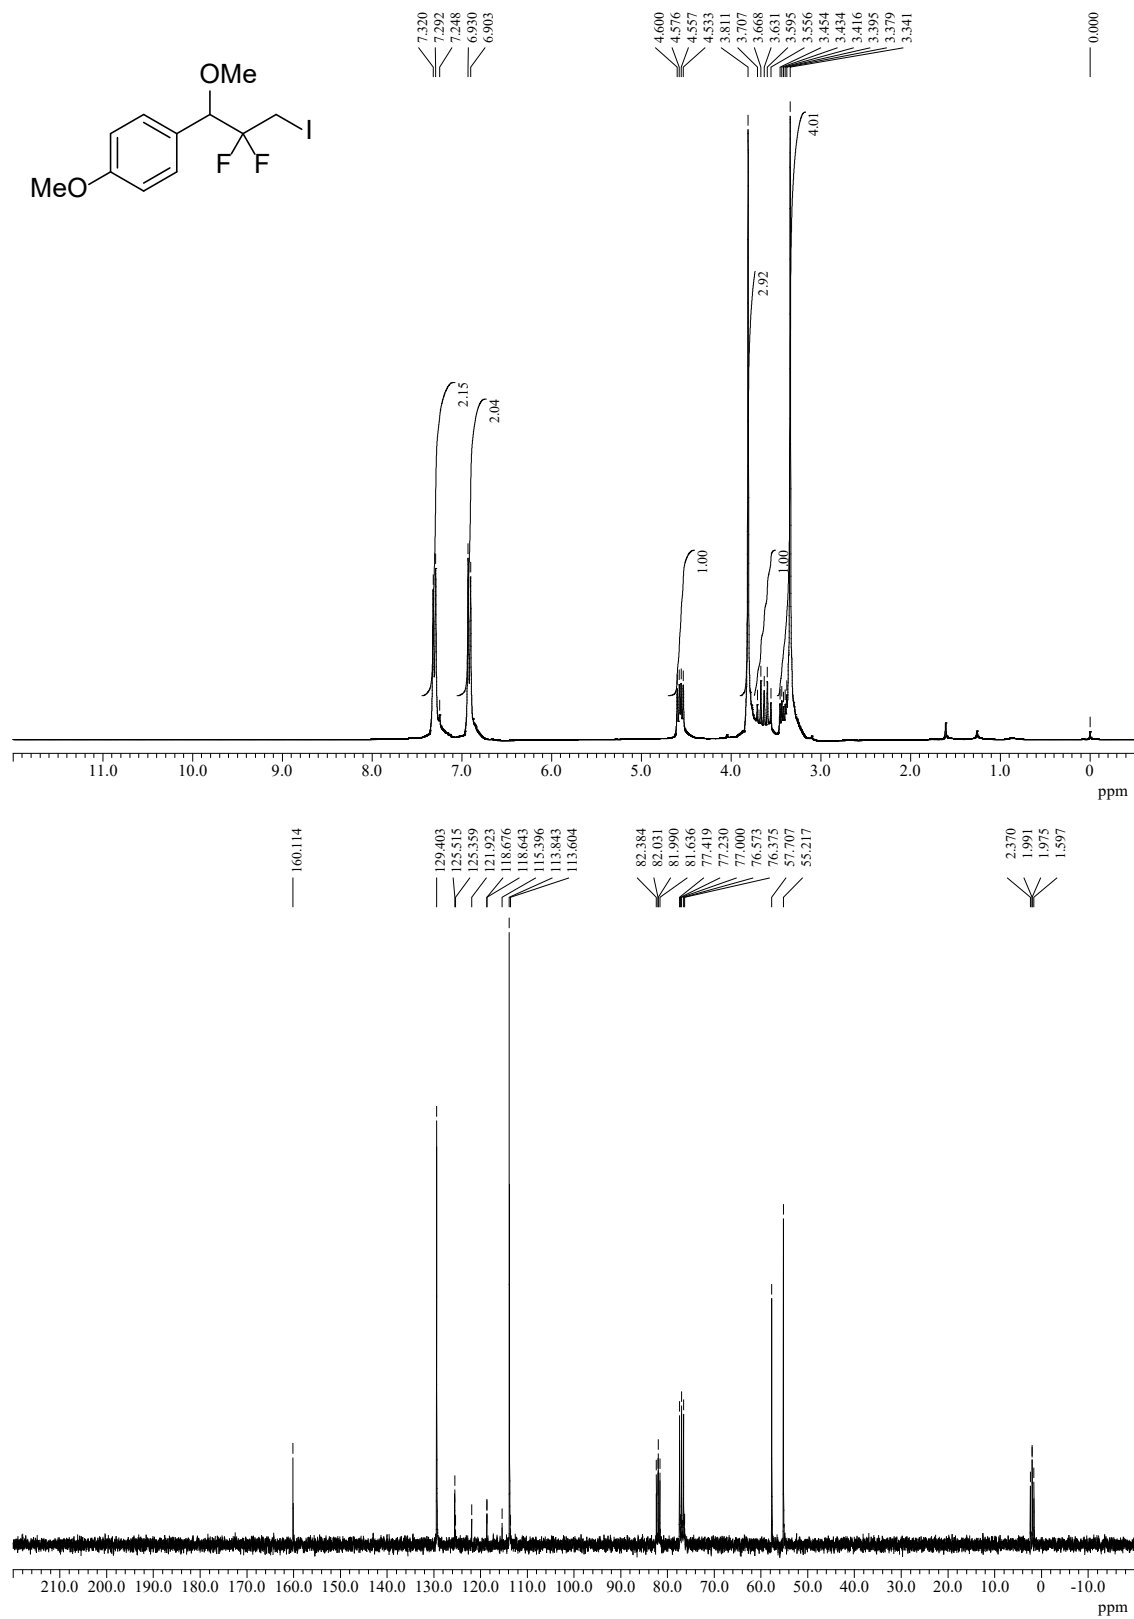

$^{19}\text{F}$  NMR spectrum of 1-(2,2-difluoro-3-iodo-1-methoxyprop-1-yl)-4-methoxybenzene (**5aa**)

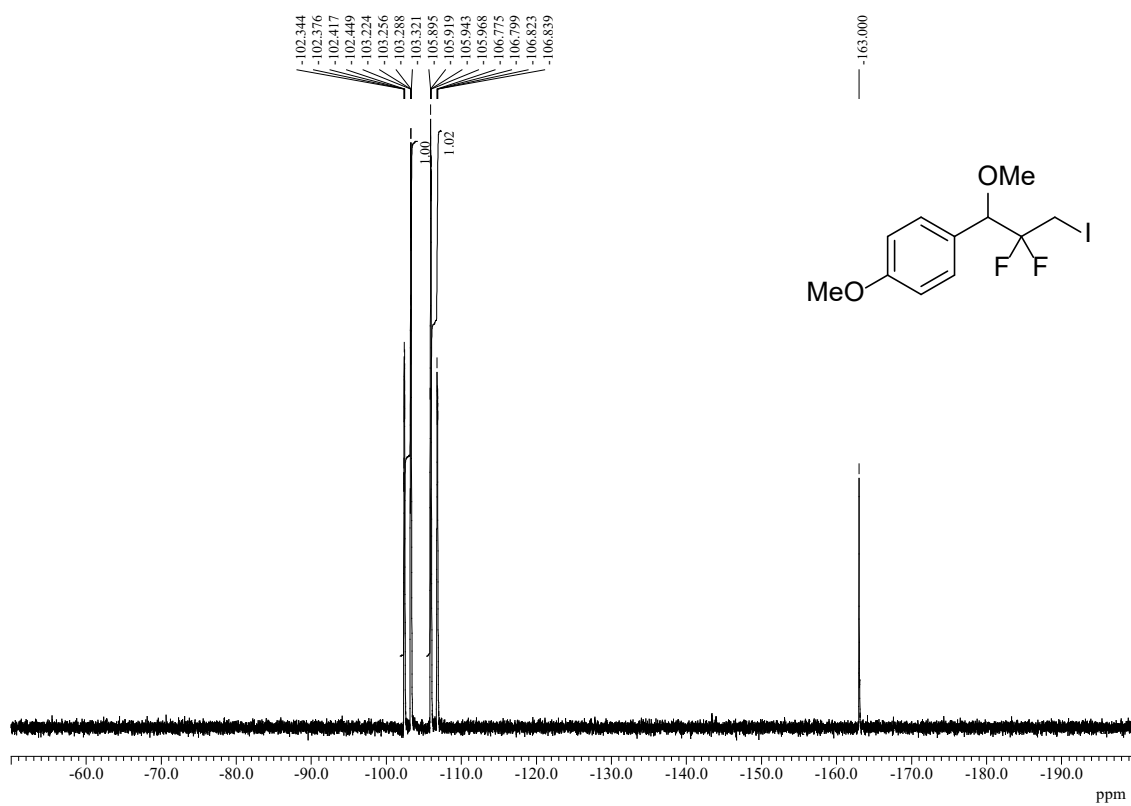

$^1\text{H}$  and  $^{13}\text{C}$  NMR spectra of 1-(2,2-difluoro-3-iodo-1-isopropoxyprop-1-yl)-4-methoxybenzene (**5ab**)

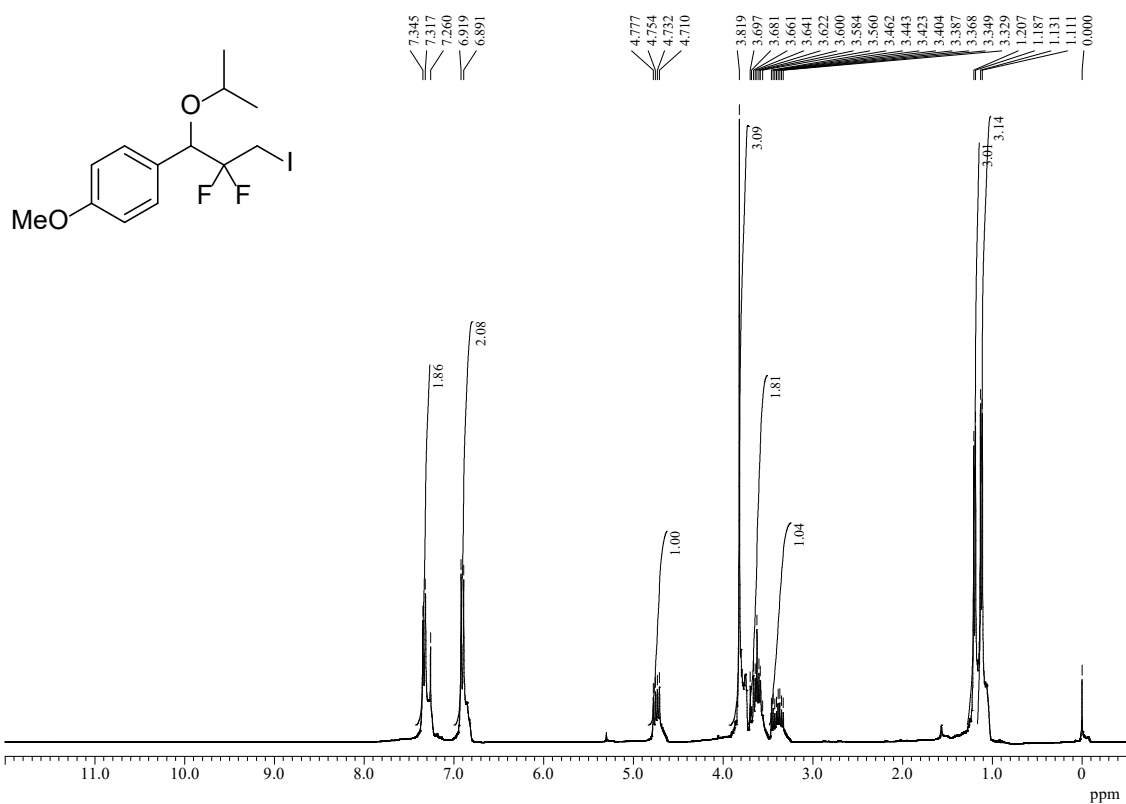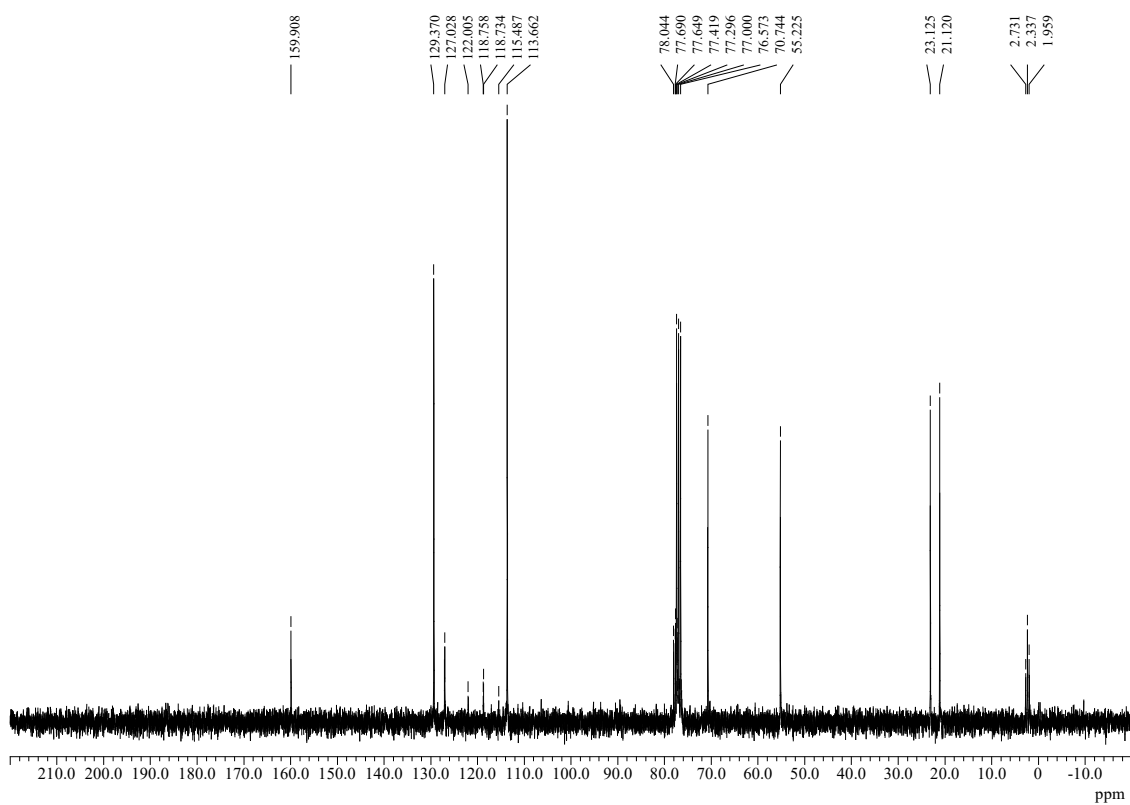

$^{19}\text{F}$  NMR spectrum of 1-(2,2-difluoro-3-iodo-1-isopropoxyprop-1-yl)-4-methoxybenzene (**5ab**)

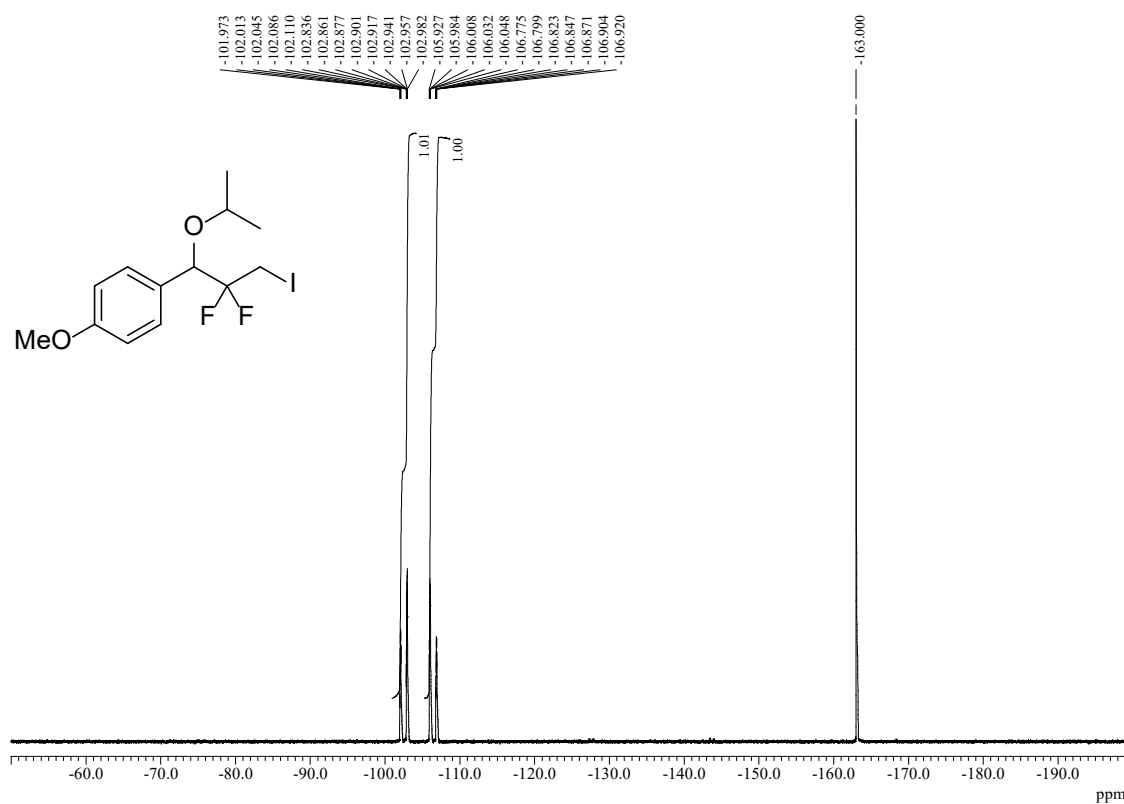

$^1\text{H}$  and  $^{13}\text{C}$  NMR spectra of 1-(2,2-difluoro-3-iodo-1-*tert*-butoxyprop-1-yl)-4-methoxybenzene (**5ac**)

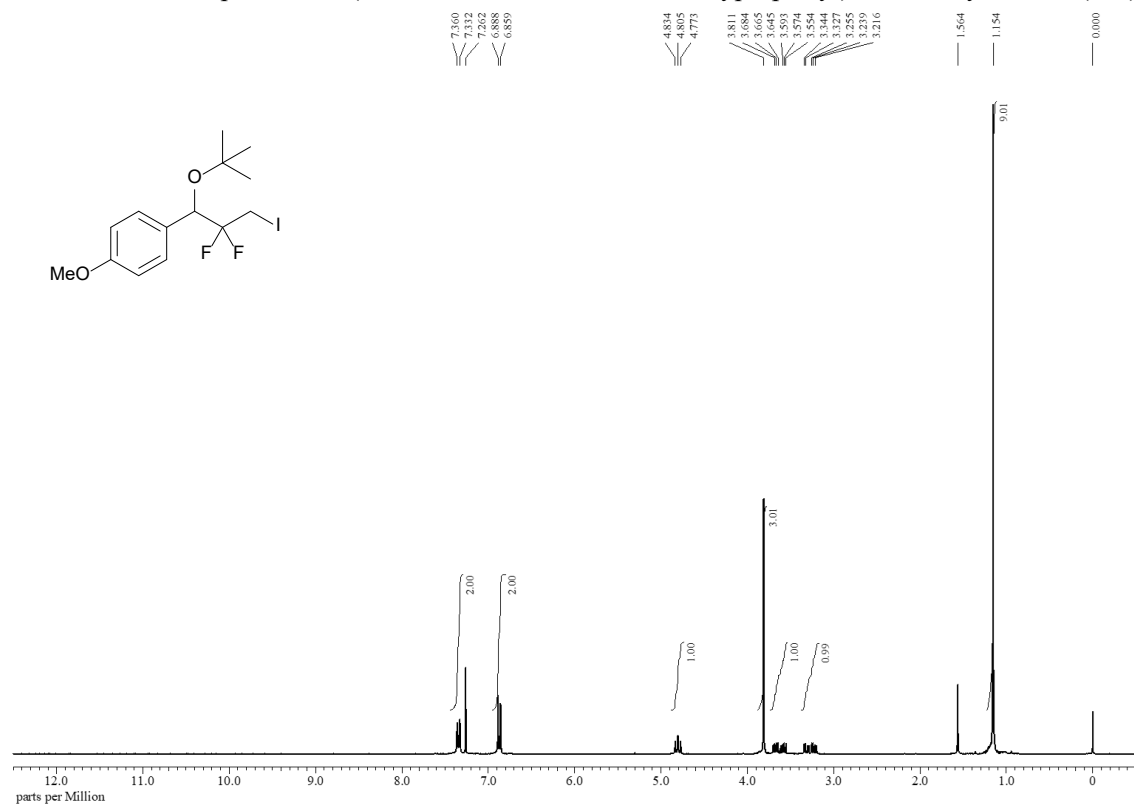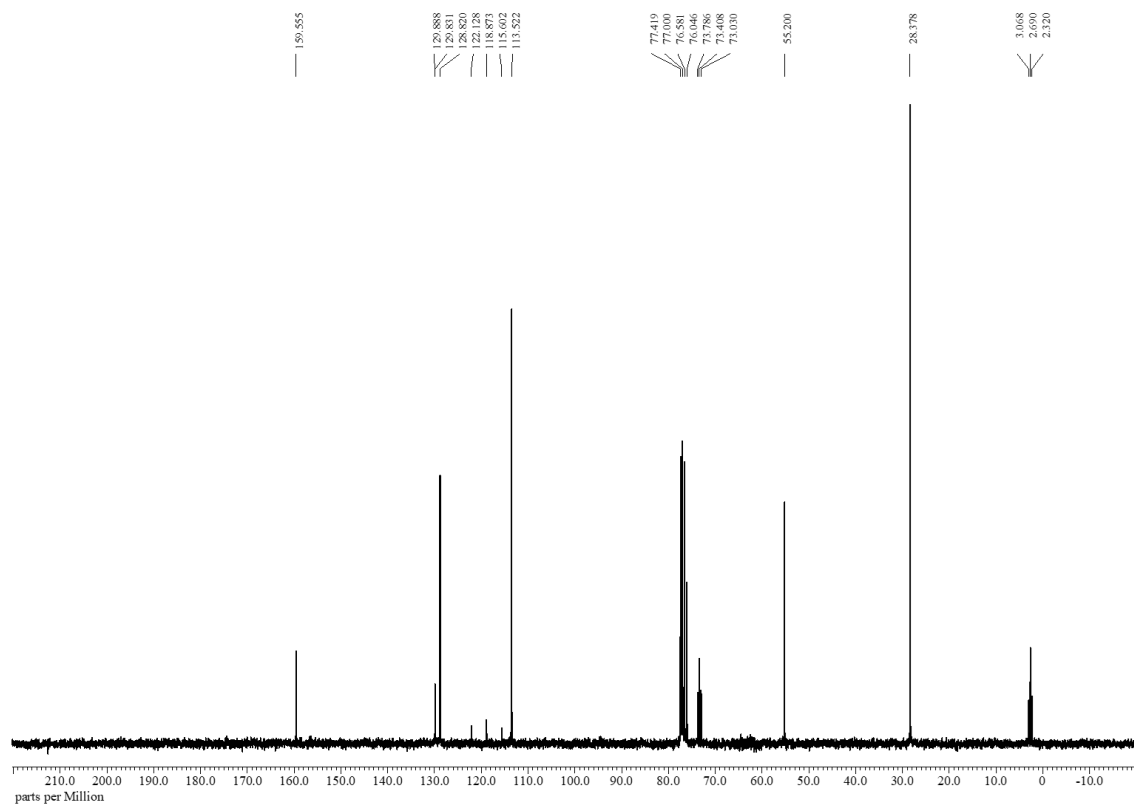



$^{19}\text{F}$  NMR spectrum of 1-(2,2-difluoro-3-iodo-1-*tert*-butoxyprop-1-yl)-4-methoxybenzene (**5ac**)

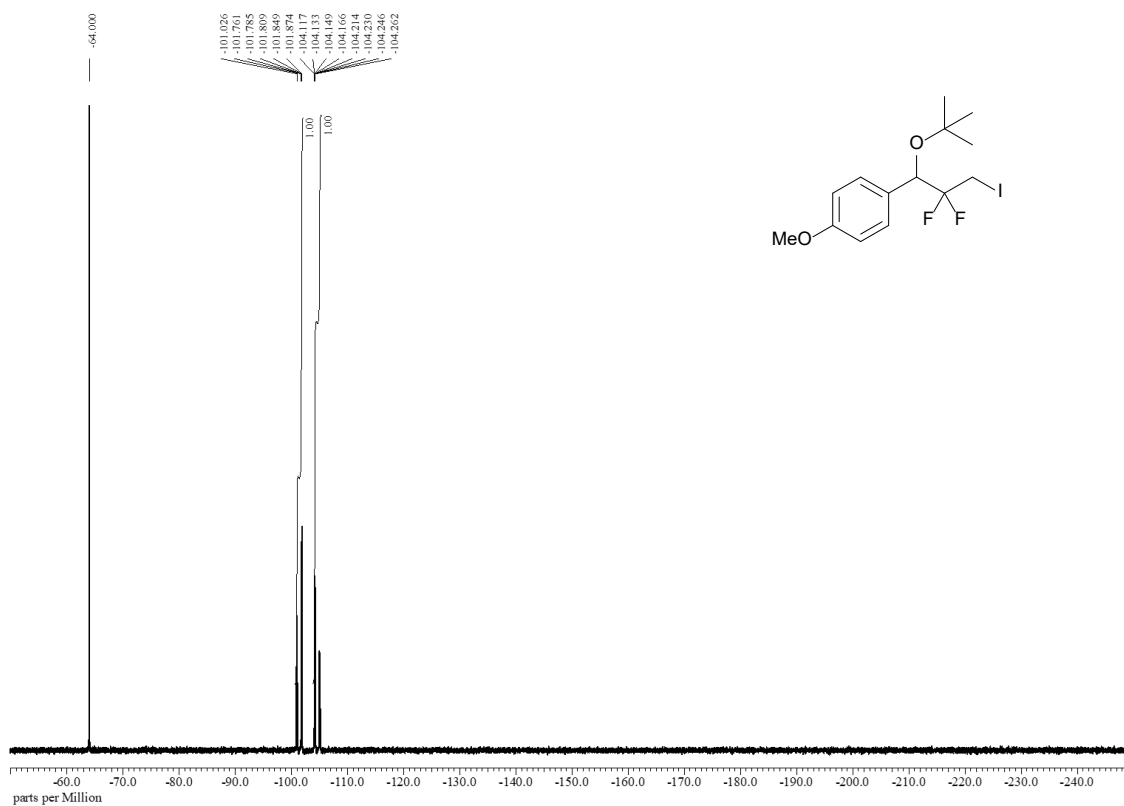

<sup>1</sup>H and <sup>13</sup>C NMR spectra of 2-{2,2-difluoro-3-iodo-1-(4-methoxyphenyl)propoxy}ethan-1-ol (**5ad**)

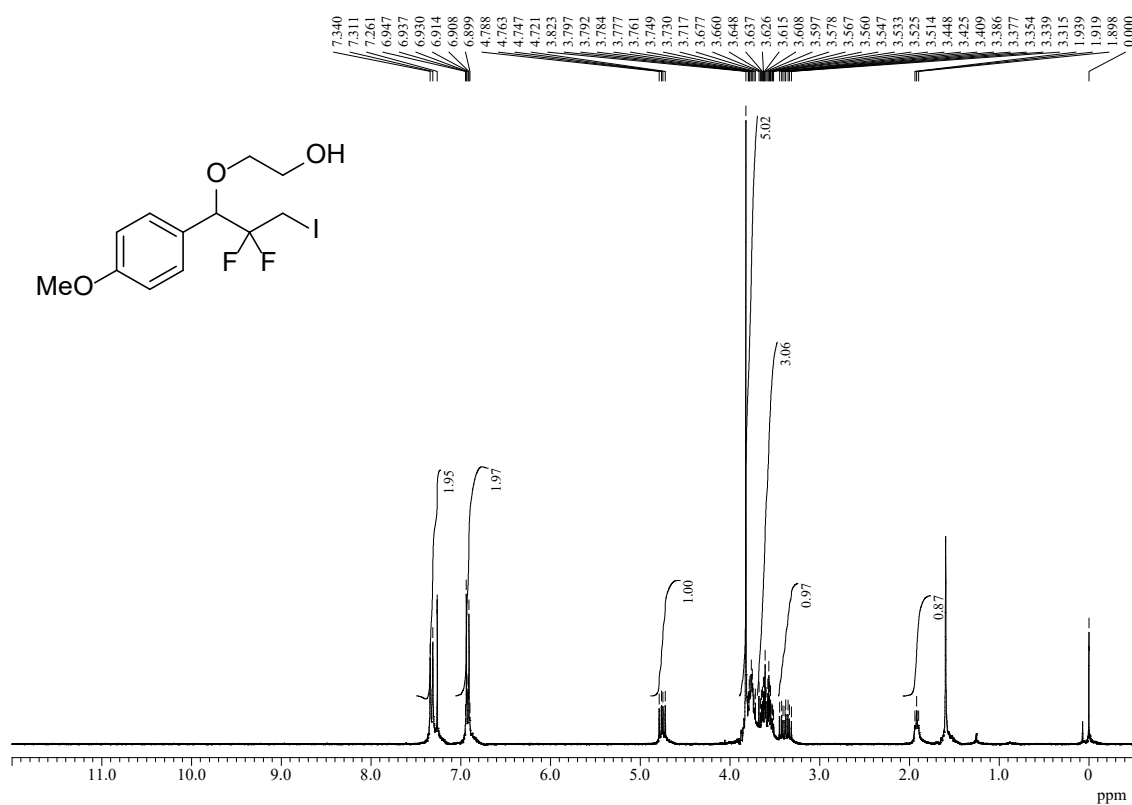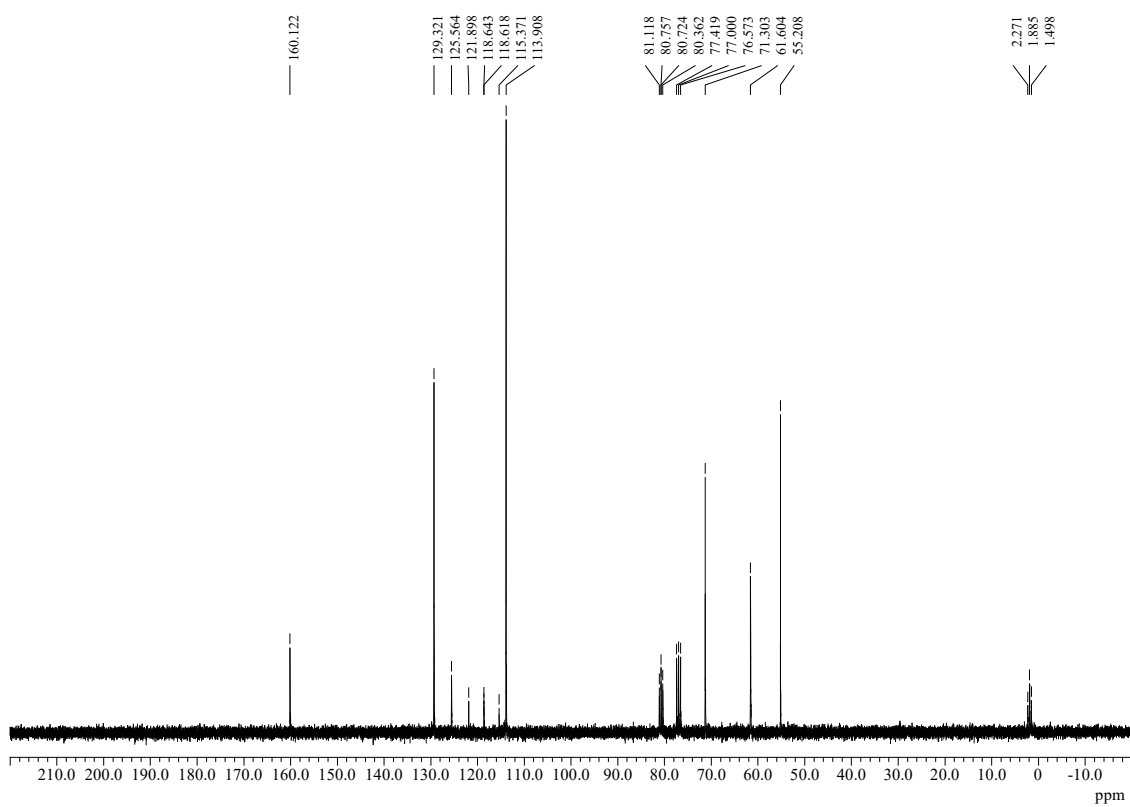

$^{19}\text{F}$  NMR spectrum of 2-{2,2-difluoro-3-iodo-1-(4-methoxyphenyl)propyloxy}ethan-1-ol (**5ad**)

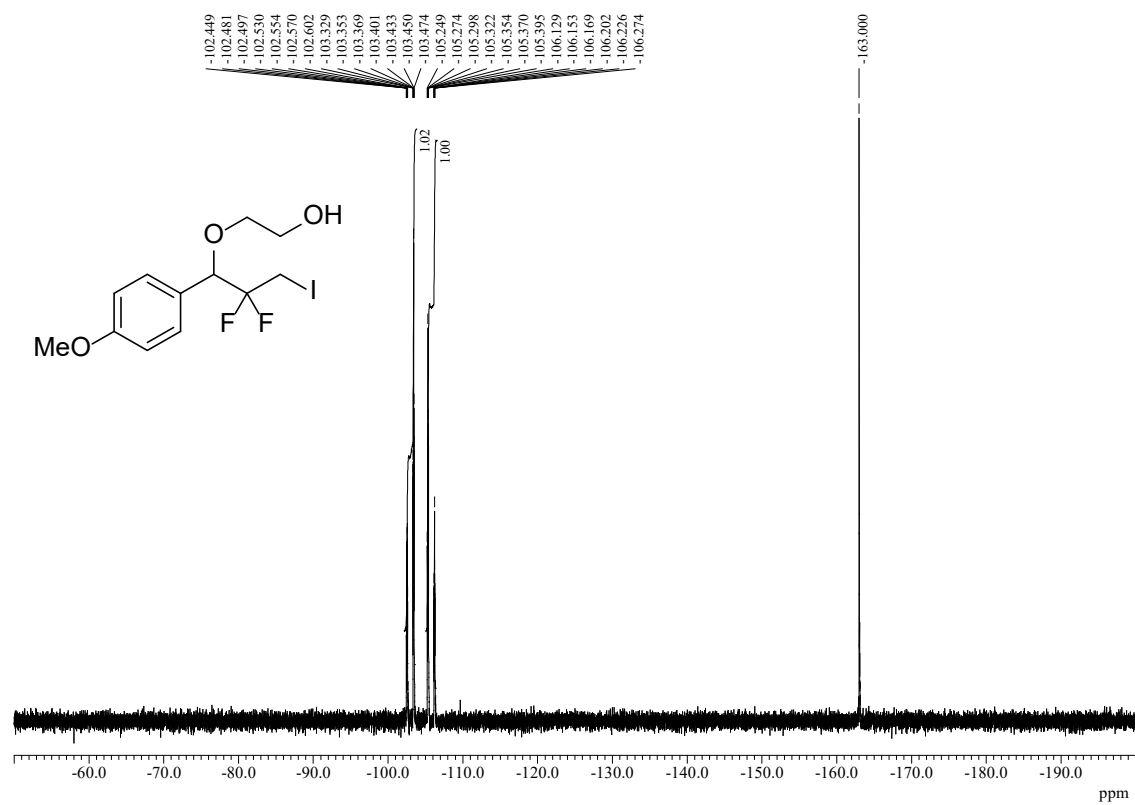

$^1\text{H}$  and  $^{13}\text{C}$  NMR spectra of 1-(3,3-difluoro-4-iodo-2-methoxybut-2-yl)-4-methoxybenzene (**5ja**)

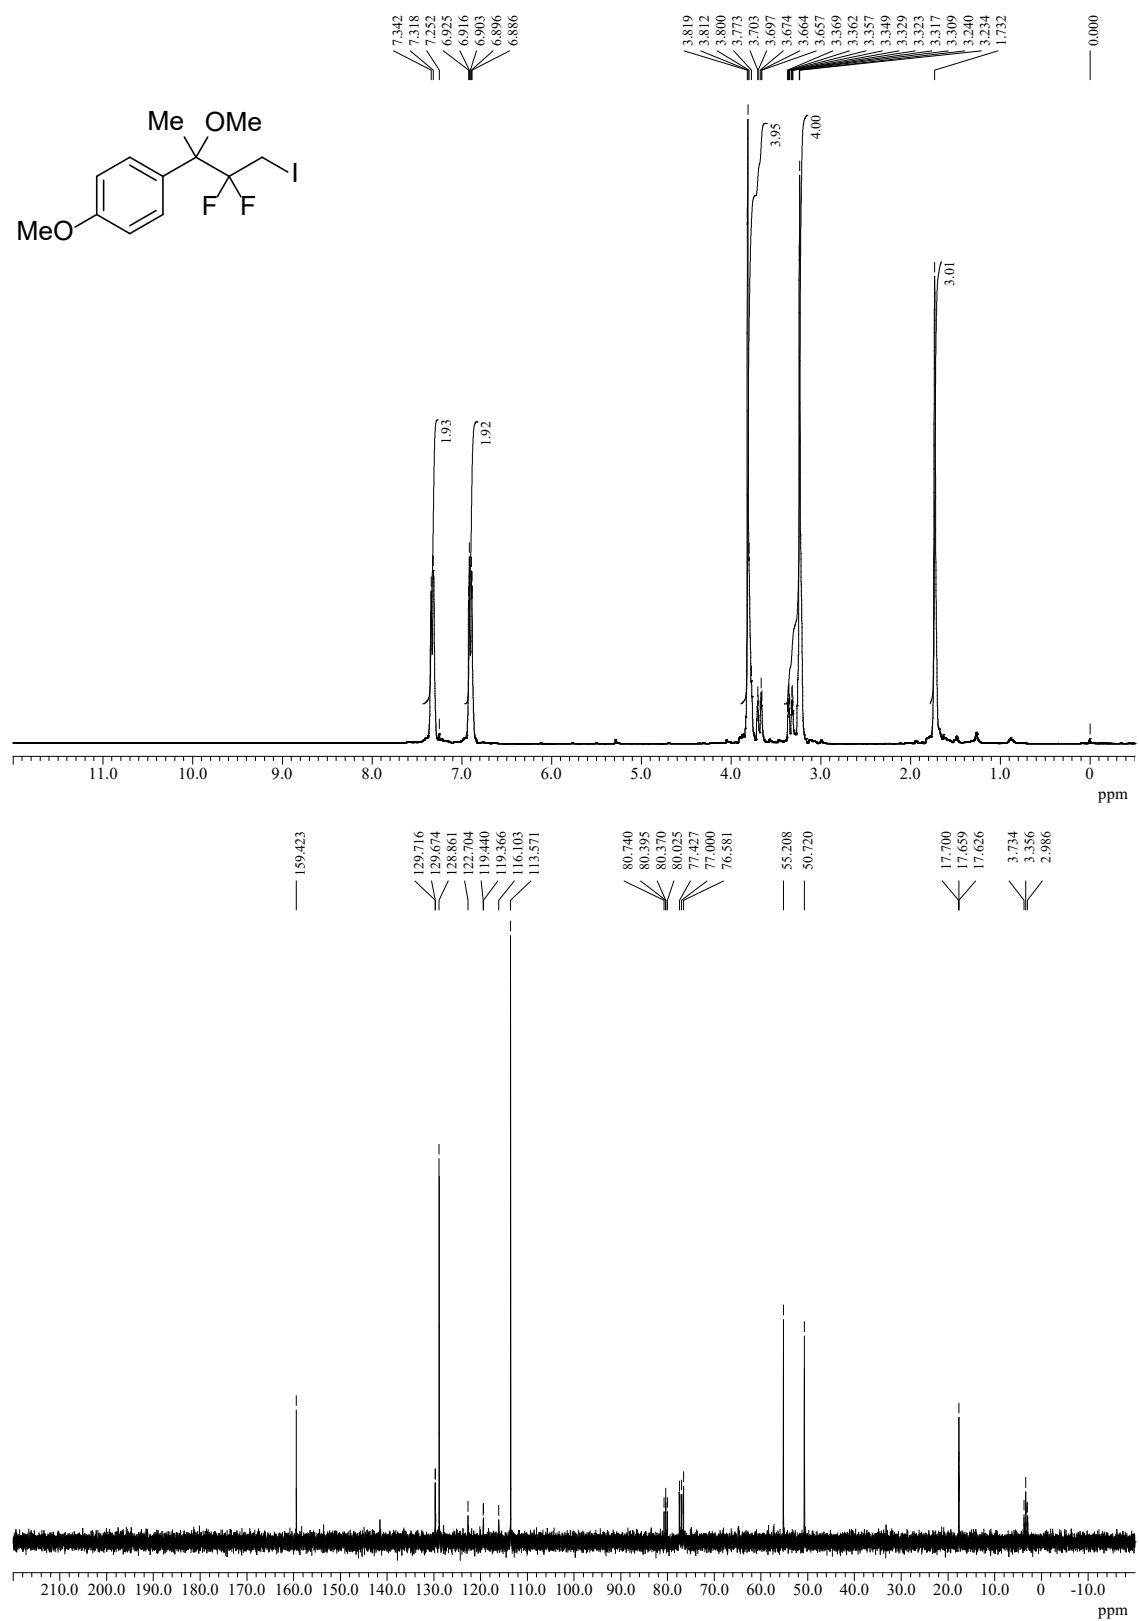

$^{19}\text{F}$  NMR spectra of 1-(3,3-difluoro-4-iodo-2-methoxybut-2-yl)-4-methoxybenzene (**5ja**)

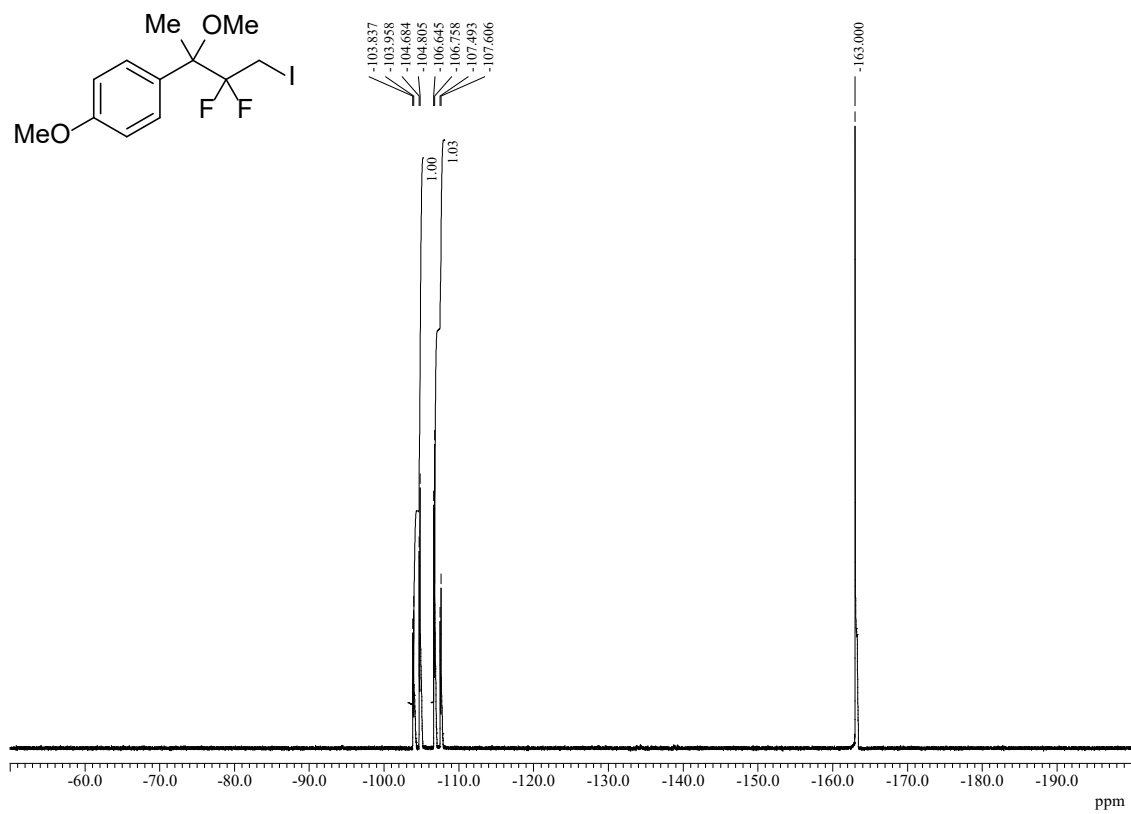

$^1\text{H}$  and  $^{13}\text{C}$  NMR spectra of 3,3-difluoro-4-iodo-2-(4-methoxyphenyl)tetrahydrofuran (**6**)

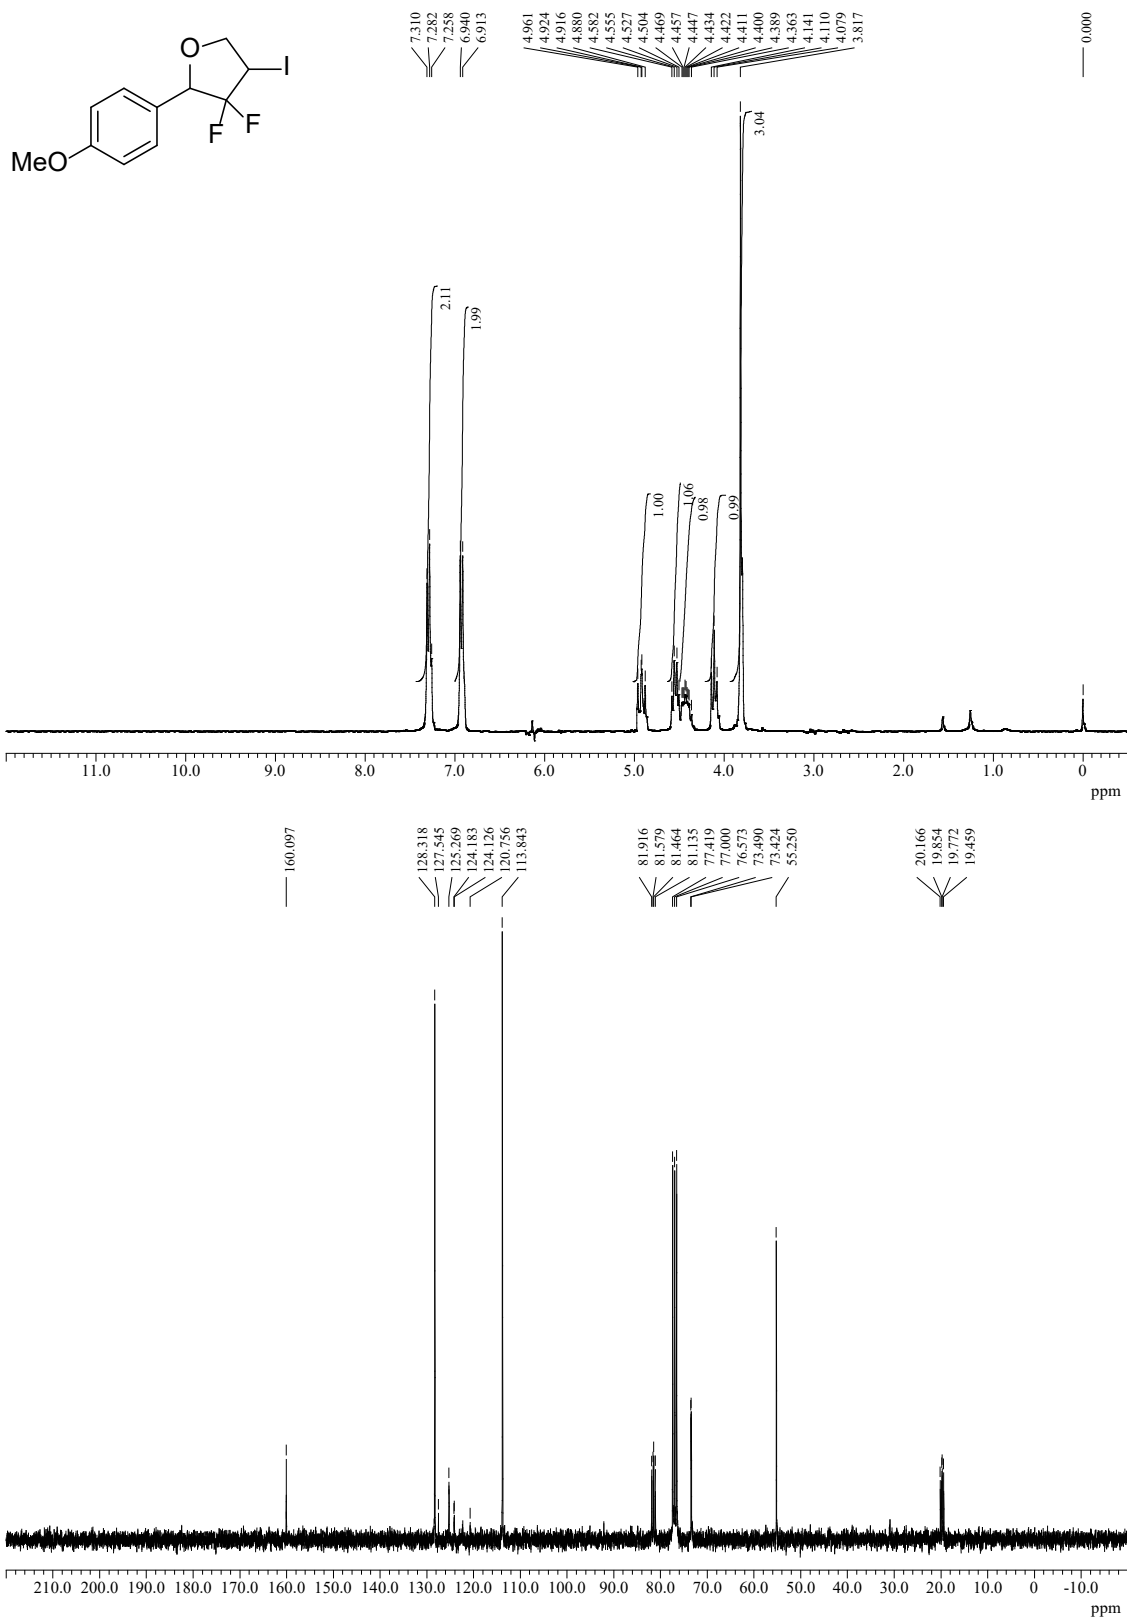

$^{19}\text{F}$  NMR spectrum of 3,3-difluoro-4-iodo-2-(4-methoxyphenyl)tetrahydrofuran (major-6, 65:35)

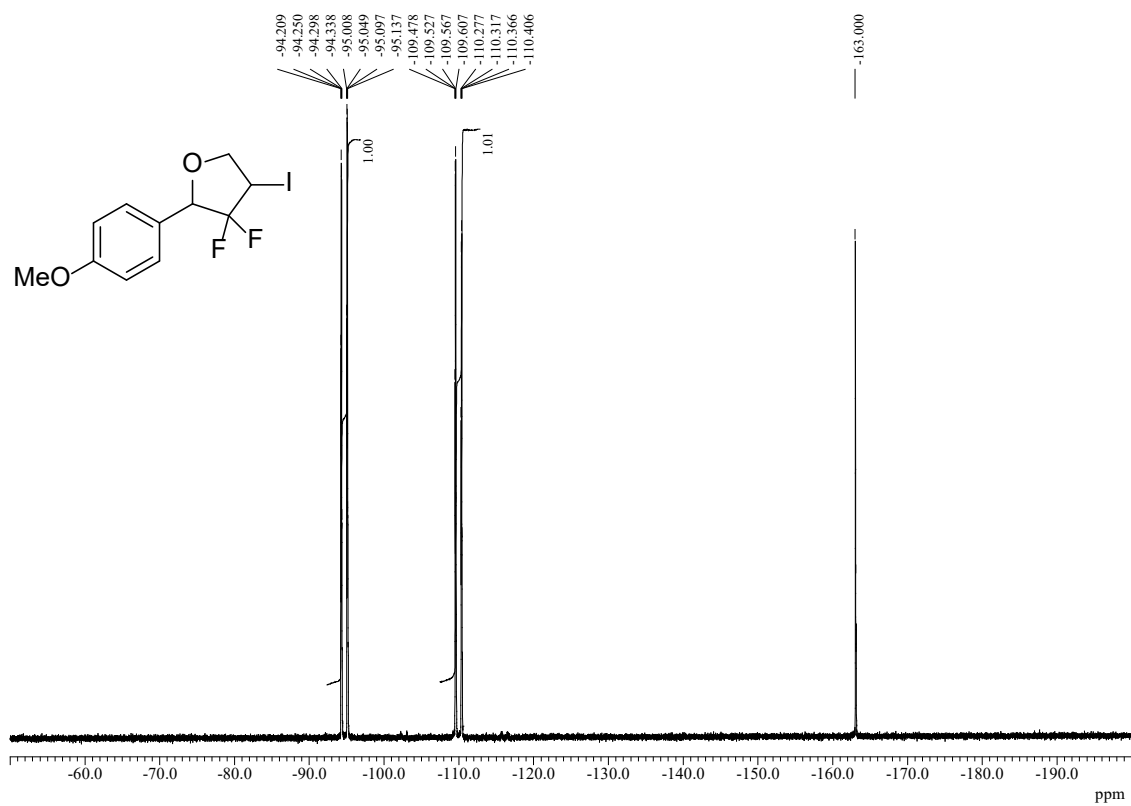

<sup>1</sup>H and <sup>13</sup>C NMR spectra of 1-(1-benzylsulfenyl-2,2-difluoro-3-iodoprop-1-yl)-4-methoxybenzene (7aa)

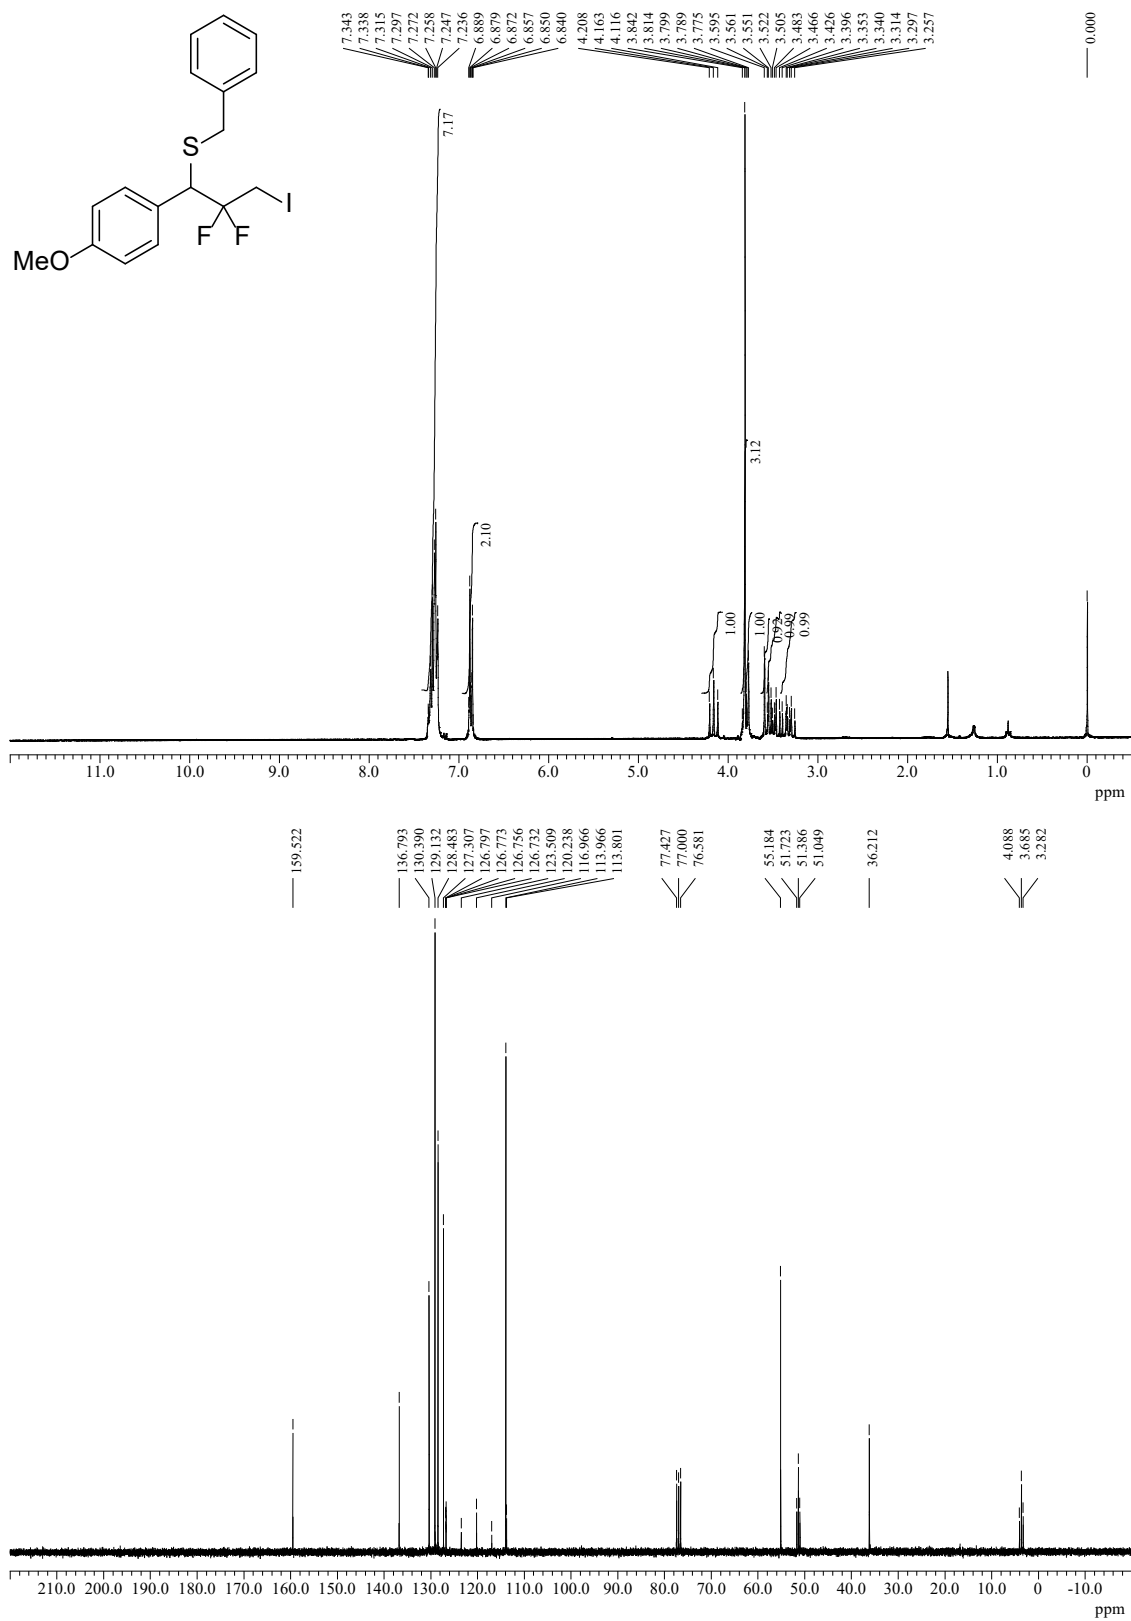



$^{19}\text{F}$  NMR spectrum of 1-(1-benzylsulfenyl-2,2-difluoro-3-iodoprop-1-yl)-4-methoxybenzene (**7aa**)

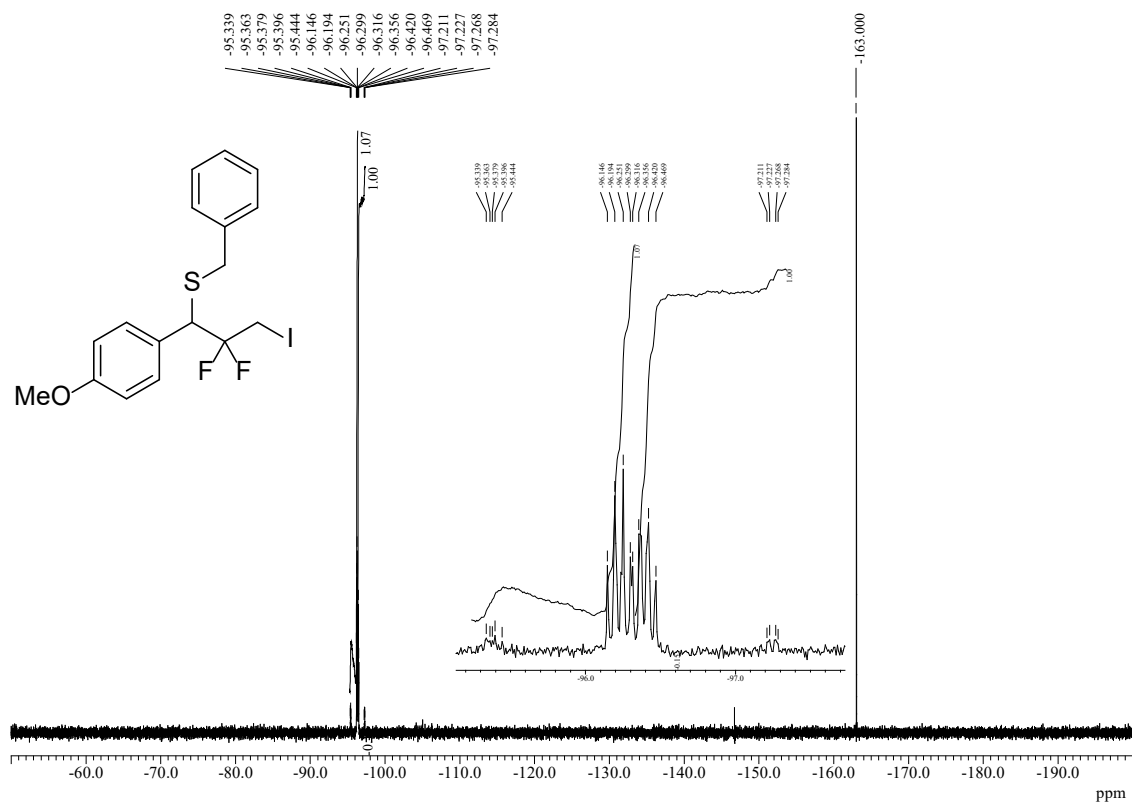

$^1\text{H}$  and  $^{13}\text{C}$  NMR spectra of 1-(2,2-difluoro-3-iodo-1-methylsulfonylprop-1-yl)-4-methoxybenzene (7ab)

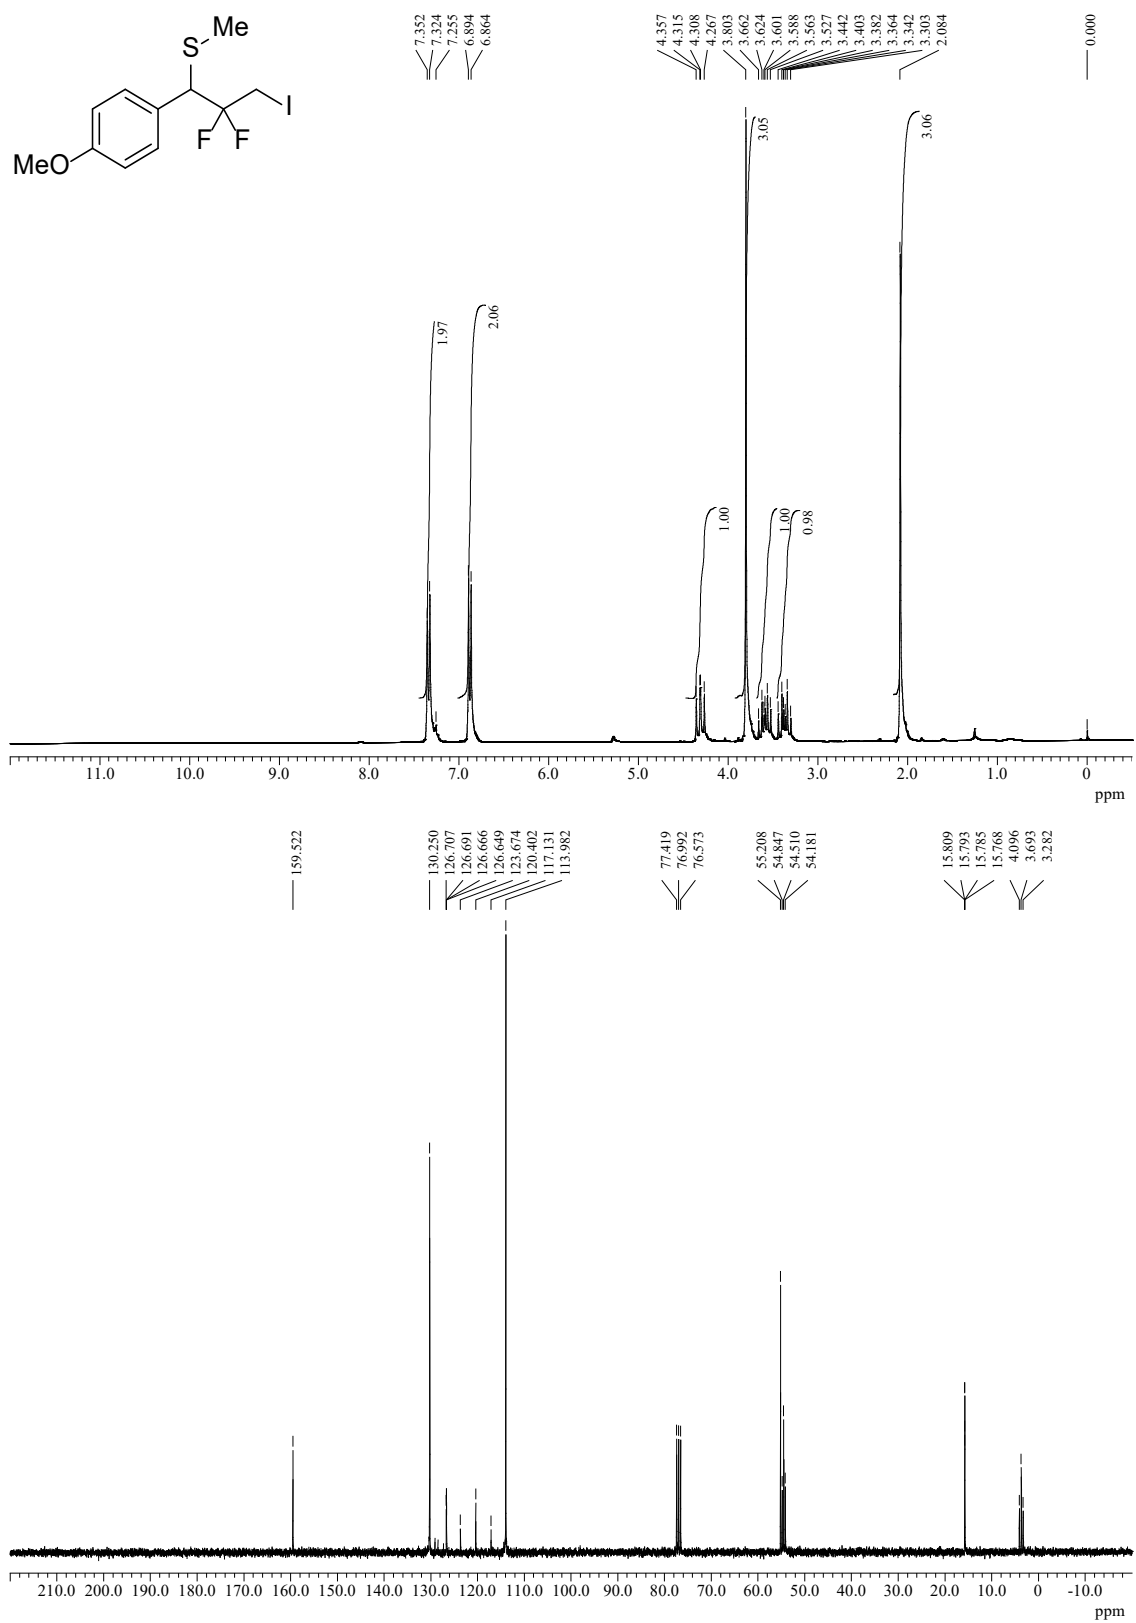

<sup>19</sup>F NMR spectrum of 1-(2,2-difluoro-3-iodo-1-methylsulfonylprop-1-yl)-4-methoxybenzene (**7ab**)

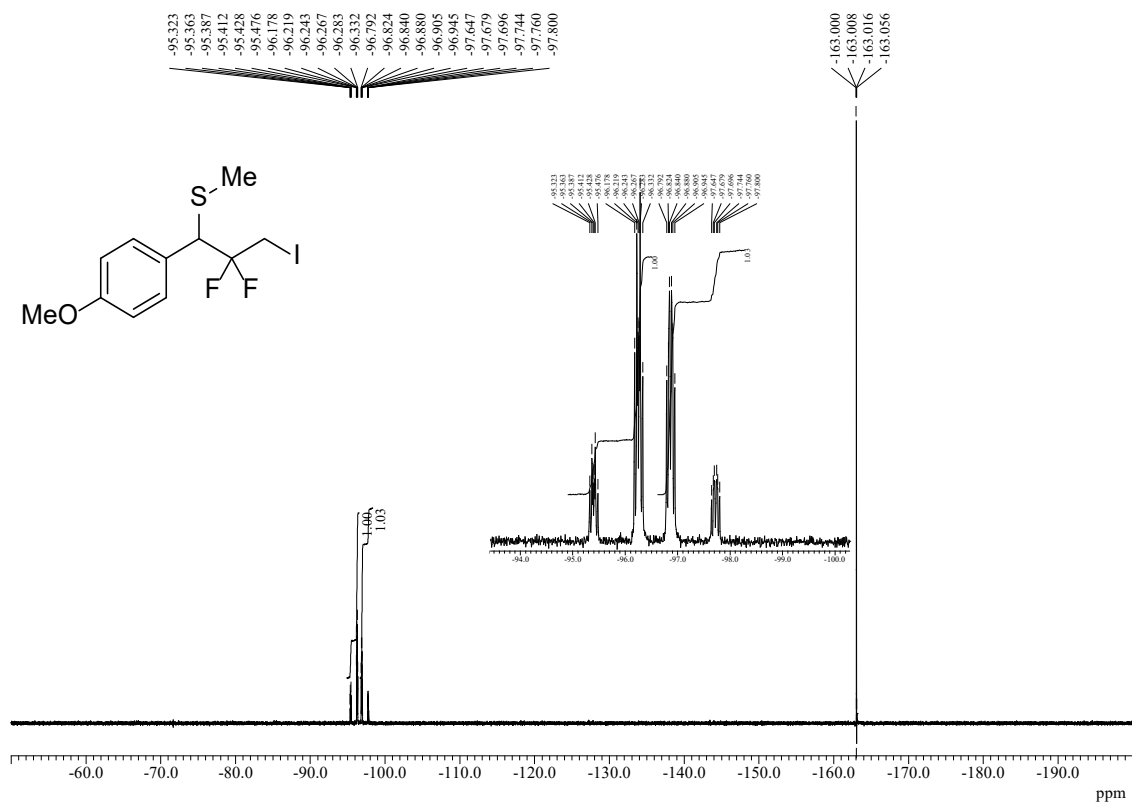

$^1\text{H}$  and  $^{13}\text{C}$  NMR spectra of 1-(1-decylsulfenyl-2,2-difluoro-3-iodoprop-1-yl)-4-methoxybenzene (7ac)

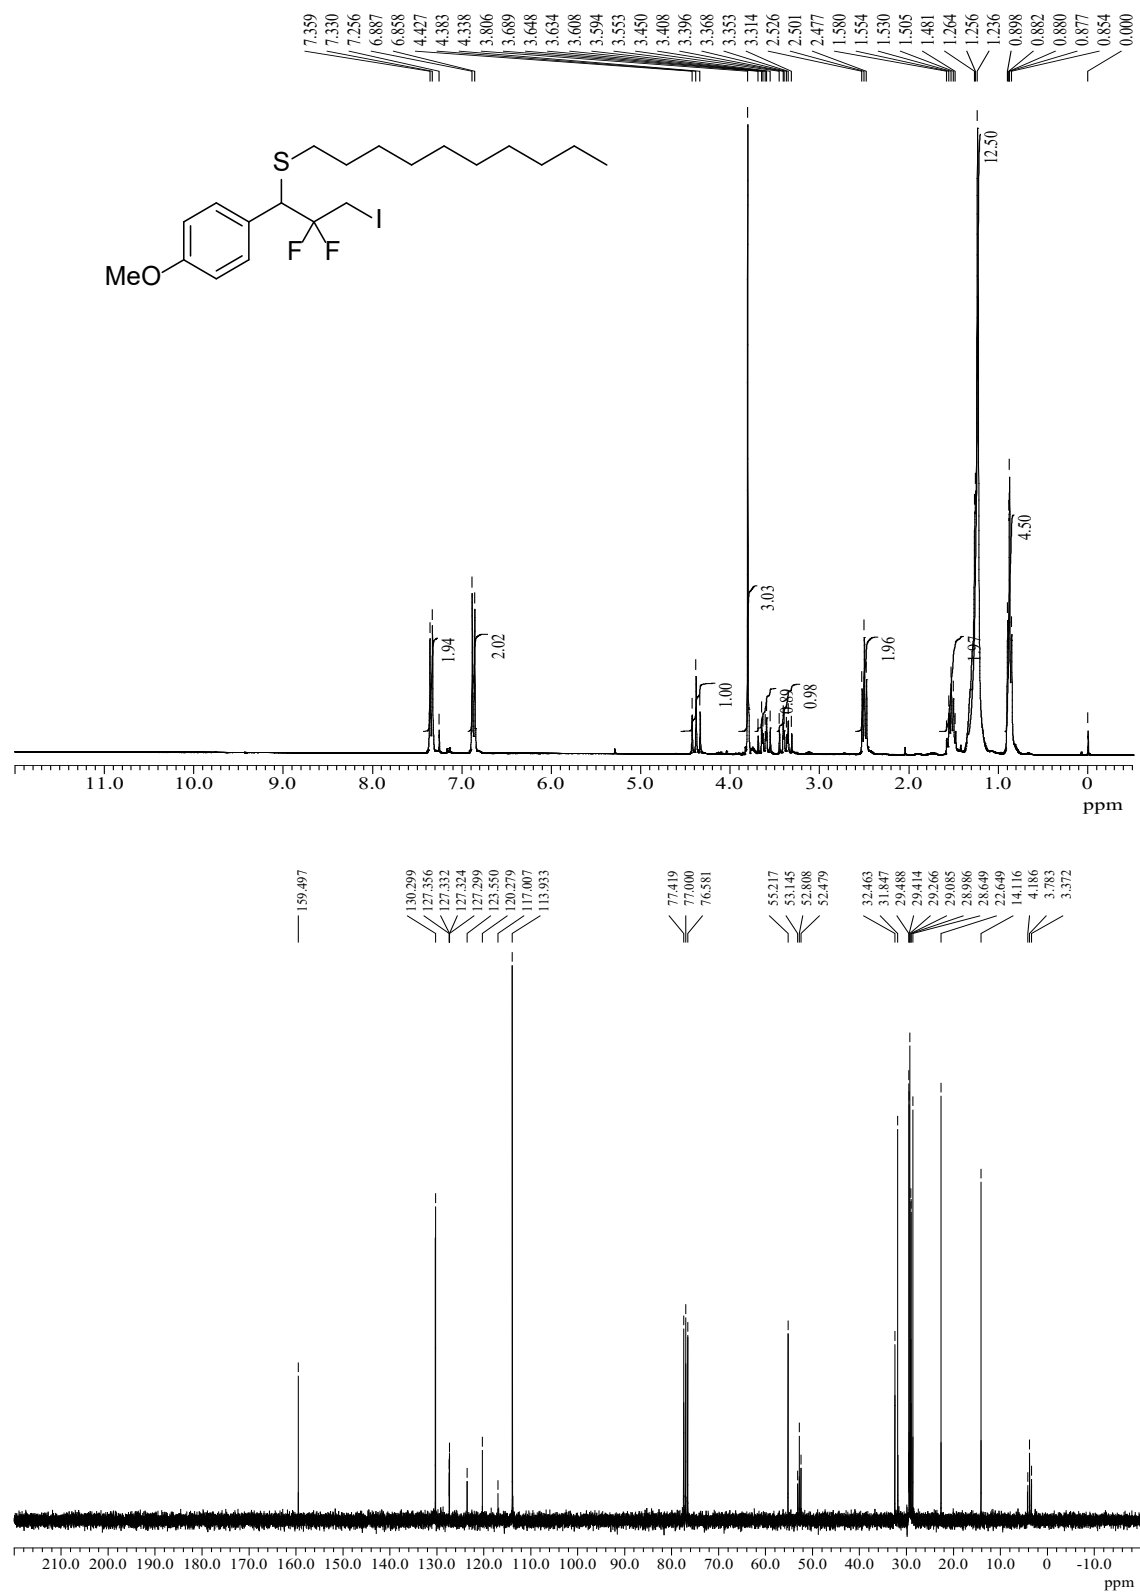

$^{19}\text{F}$  NMR spectrum of 1-(1-decylsulfenyl-2,2-difluoro-3-iodoprop-1-yl)-4-methoxybenzene (**7ac**)

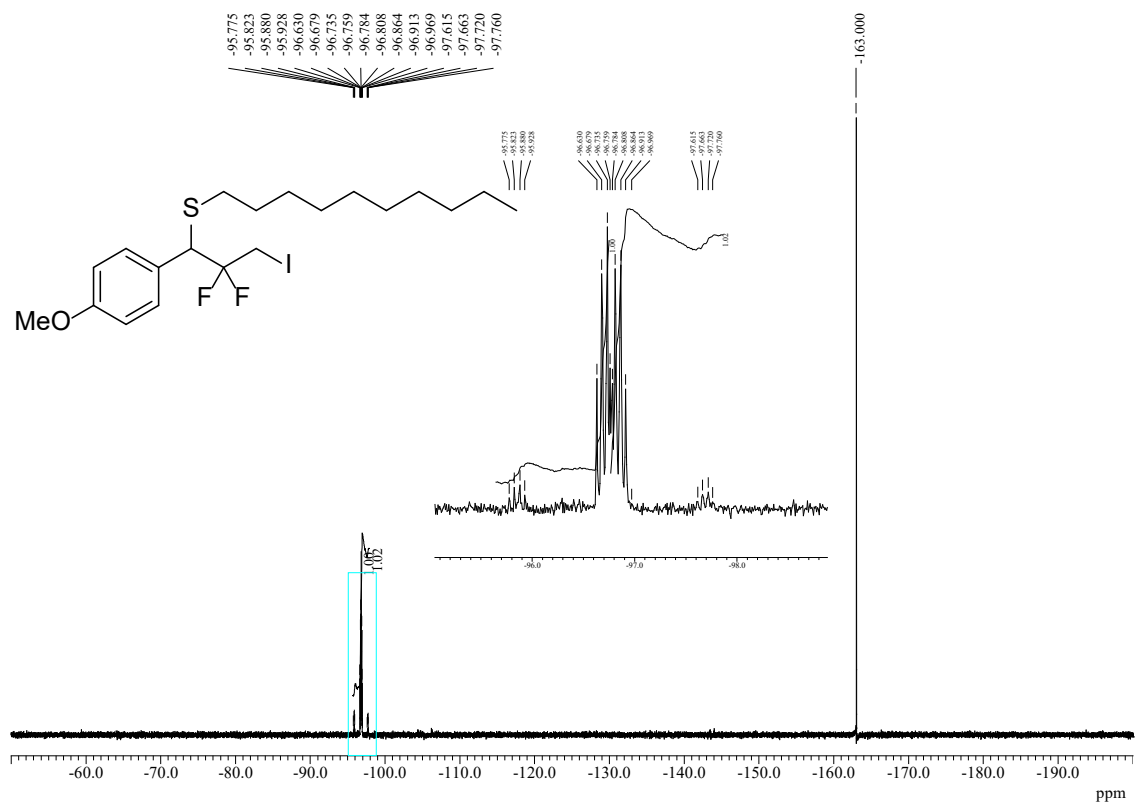

$^1\text{H}$  and  $^{13}\text{C}$  NMR spectra of 1-(1-cyclohexylsulfenyl-2,2-difluoro-3-iodoprop-1-yl)-4-methoxybenzene (**7ad**)

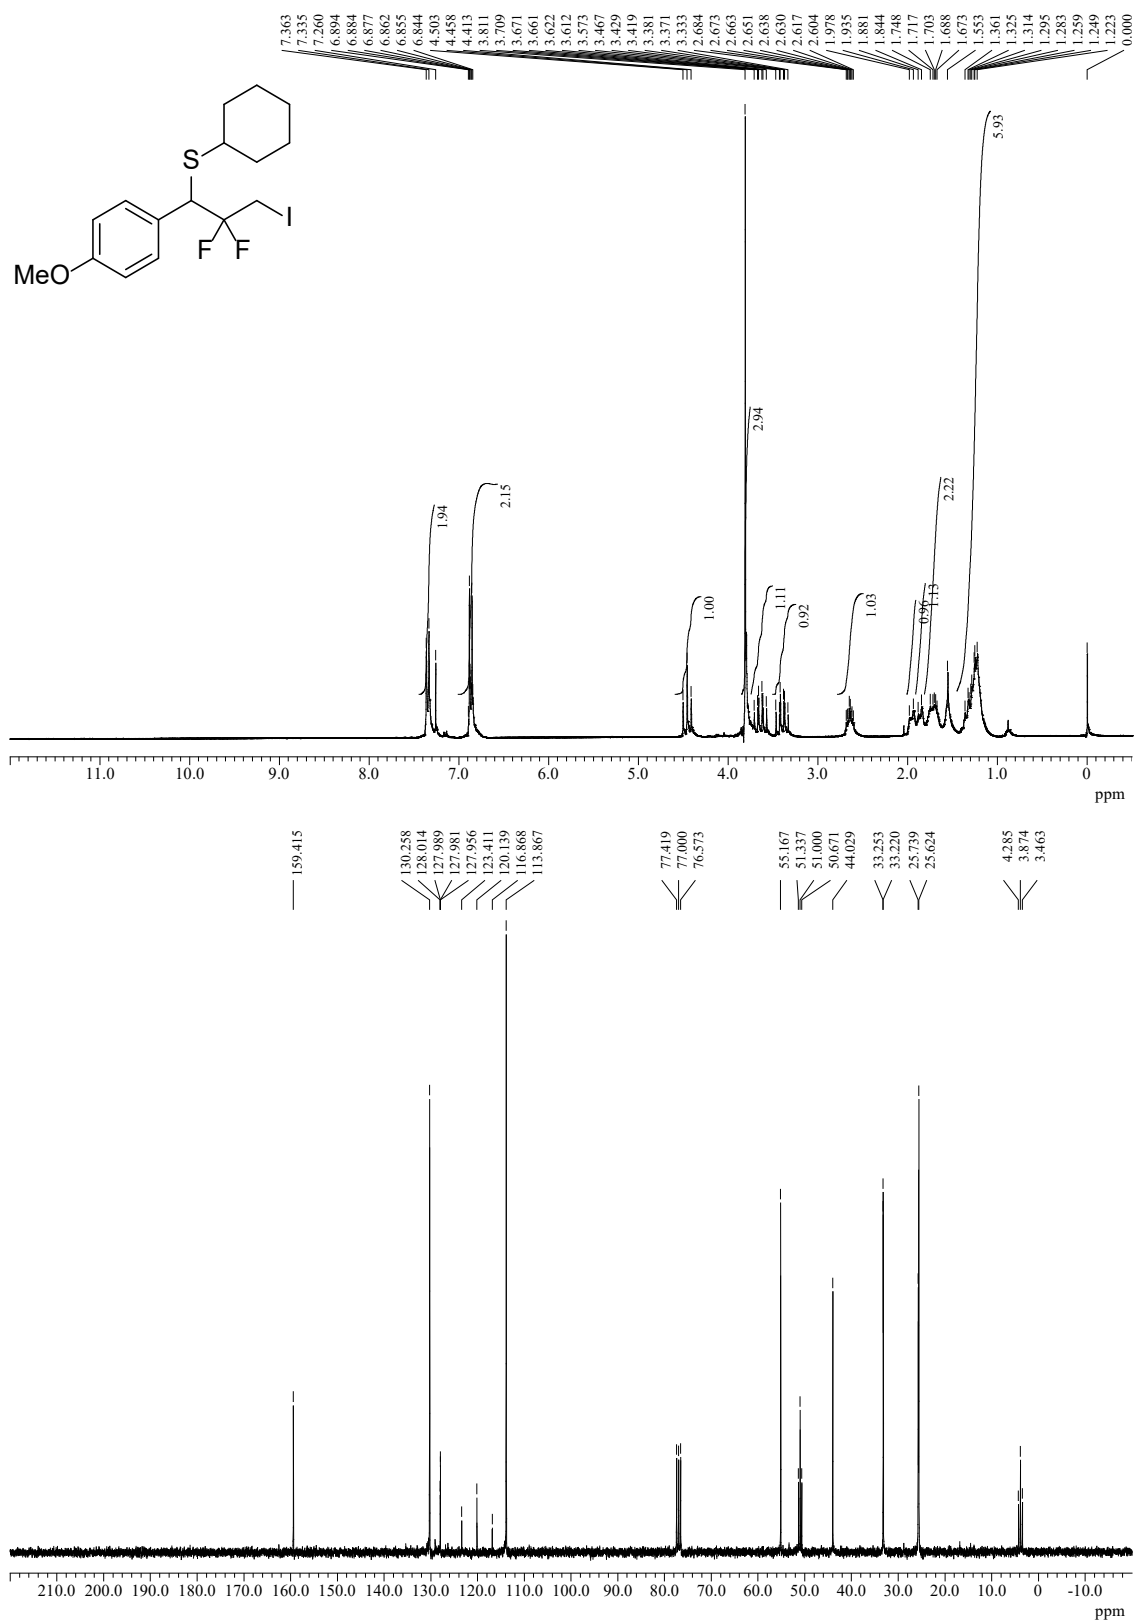

$^{19}\text{F}$  NMR spectrum of 1-(1-cyclohexylsulfenyl-2,2-difluoro-3-iodoprop-1-yl)-4-methoxybenzene (7ad)

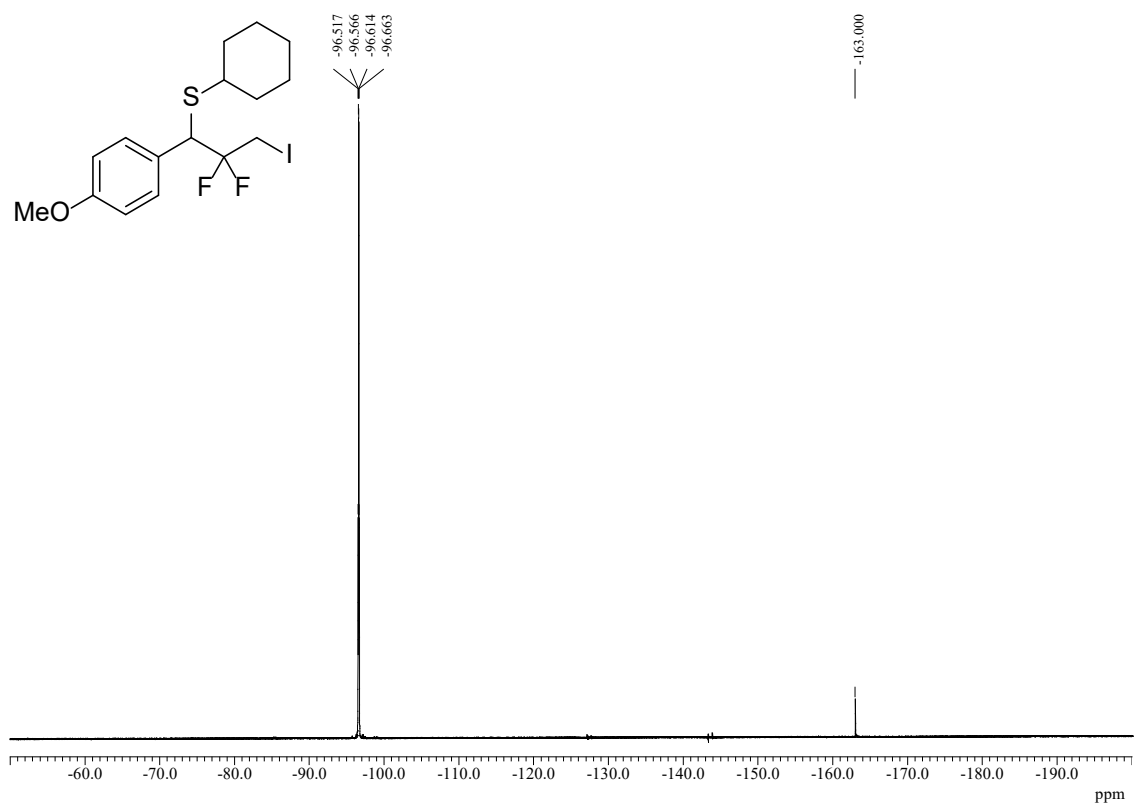

<sup>1</sup>H and <sup>13</sup>C NMR spectra of 1-(2,2-difluoro-3-iodo-1-phenylsulfenylprop-1-yl)-4-methoxybenzene (7ae)

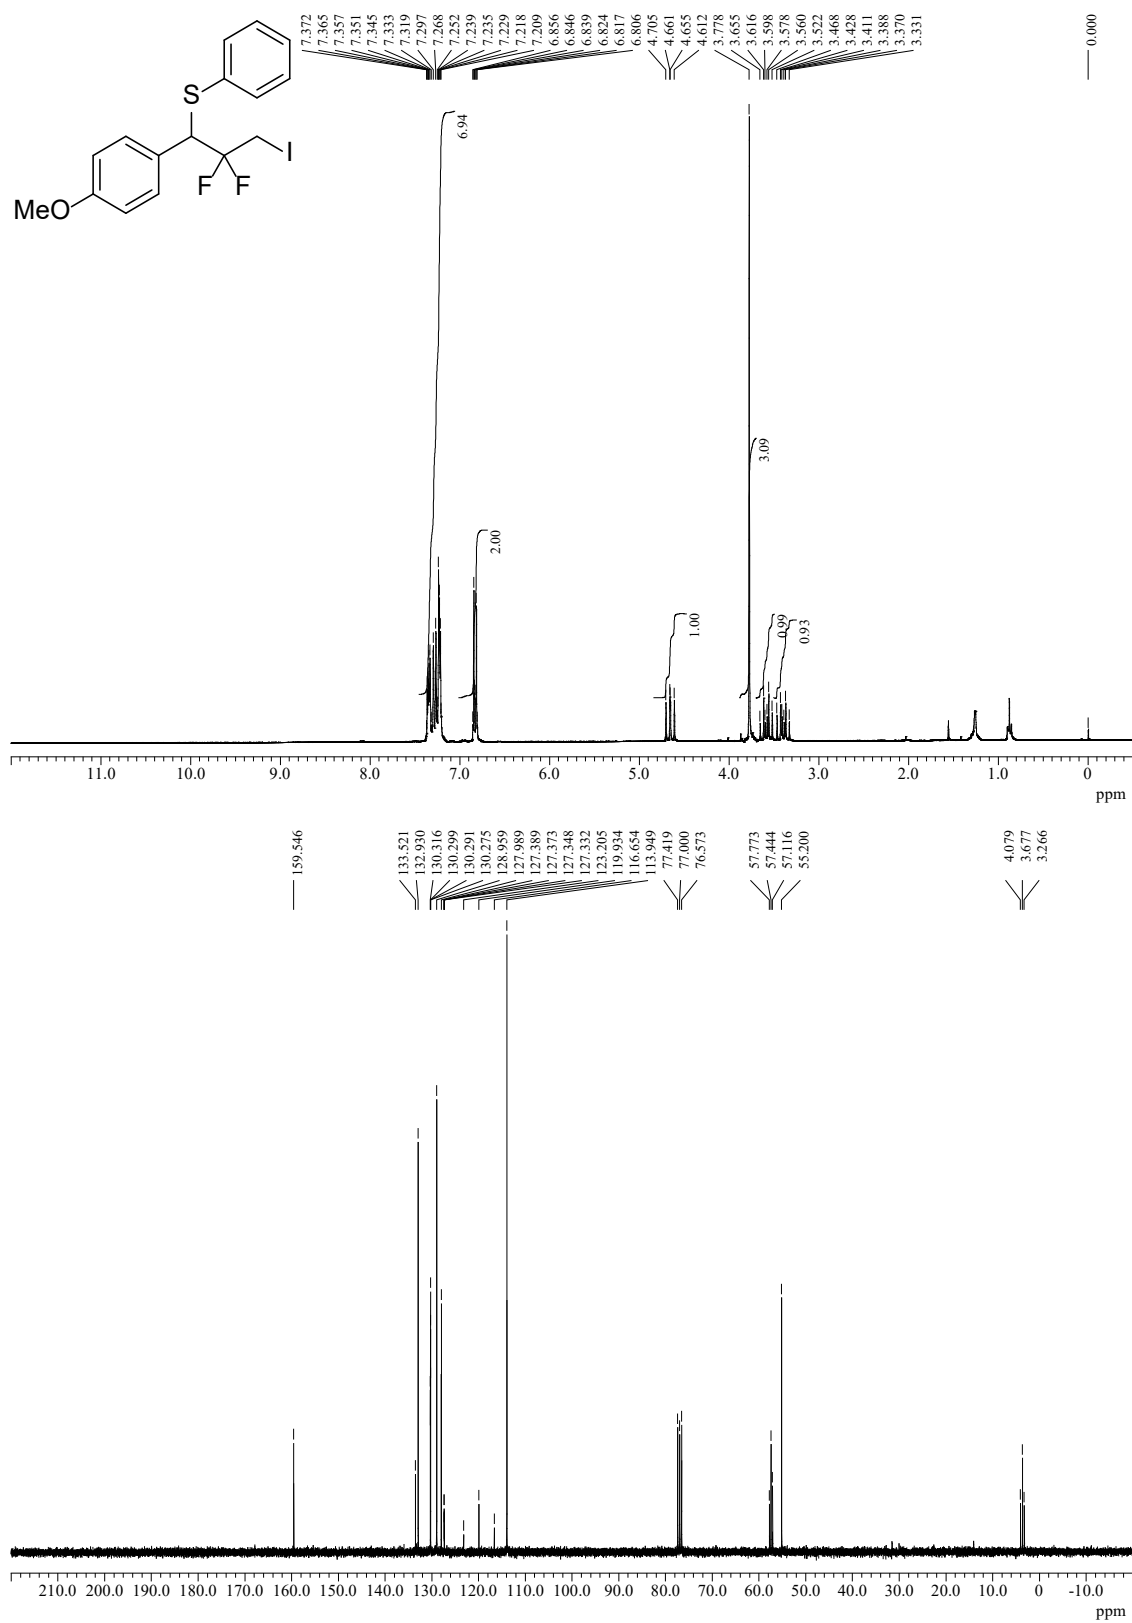



$^{19}\text{F}$  NMR spectrum of 1-((2,2-difluoro-3-iodo-1-phenylsulfenyl)propyl)-4-methoxybenzene (**7ae**)

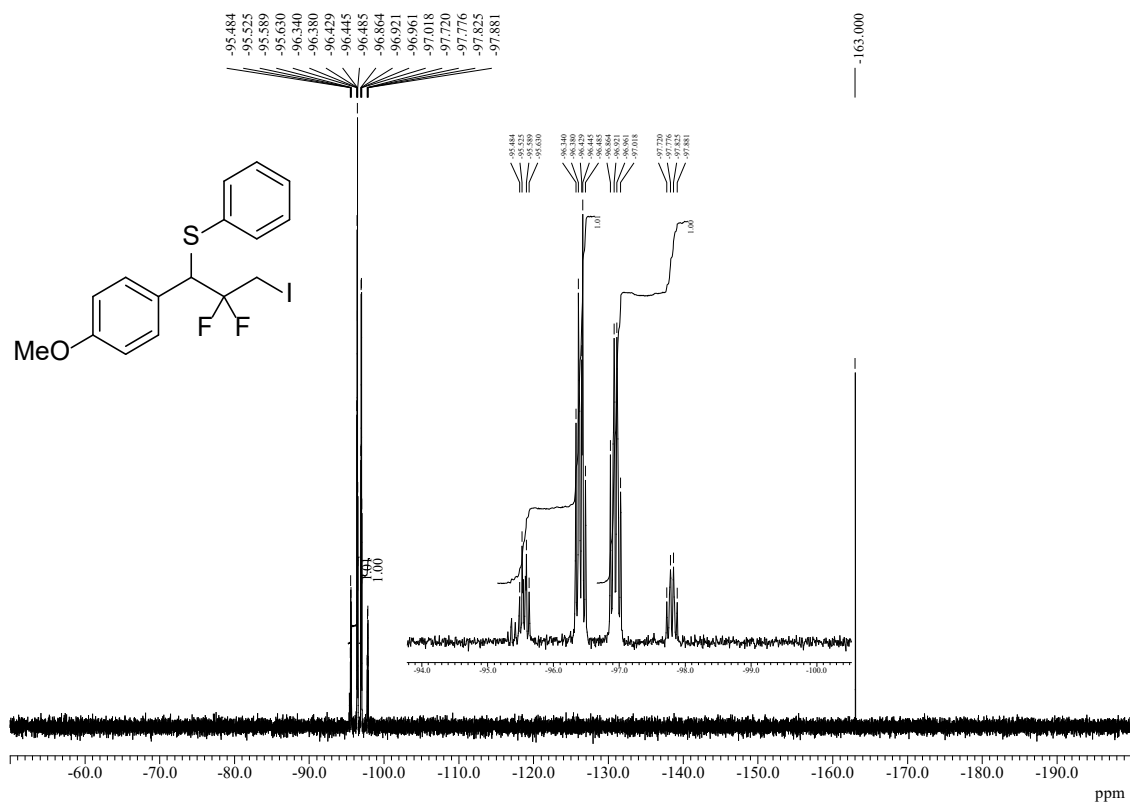

$^1\text{H}$  and  $^{13}\text{C}$  NMR spectra of methyl 3-{1-[2,2-difluoro-3-iodo-1-(4-methoxyphenyl)prop-1-yl]-sulfenyl}propanoate (**7af**)

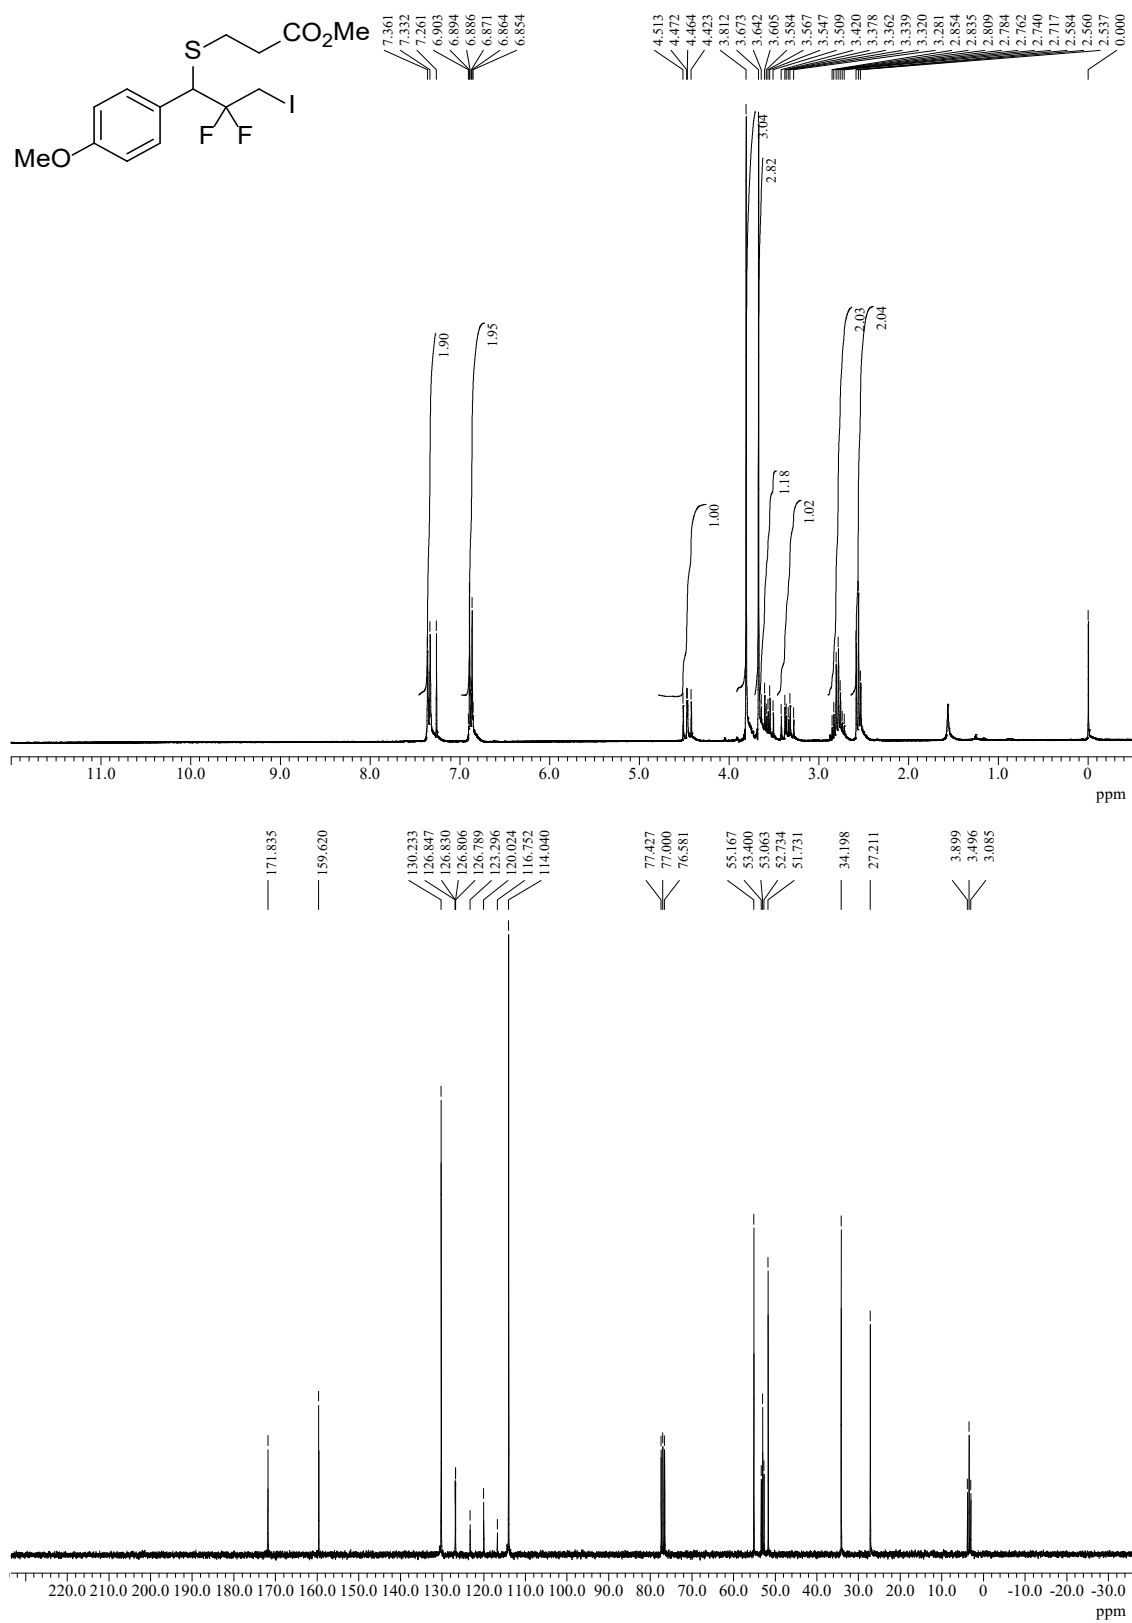

$^{19}\text{F}$  NMR spectrum of methyl 3-{1-[2,2-difluoro-3-iodo-1-(4-methoxyphenyl)prop-1-yl]sulfenyl}-propanoate (**7af**)

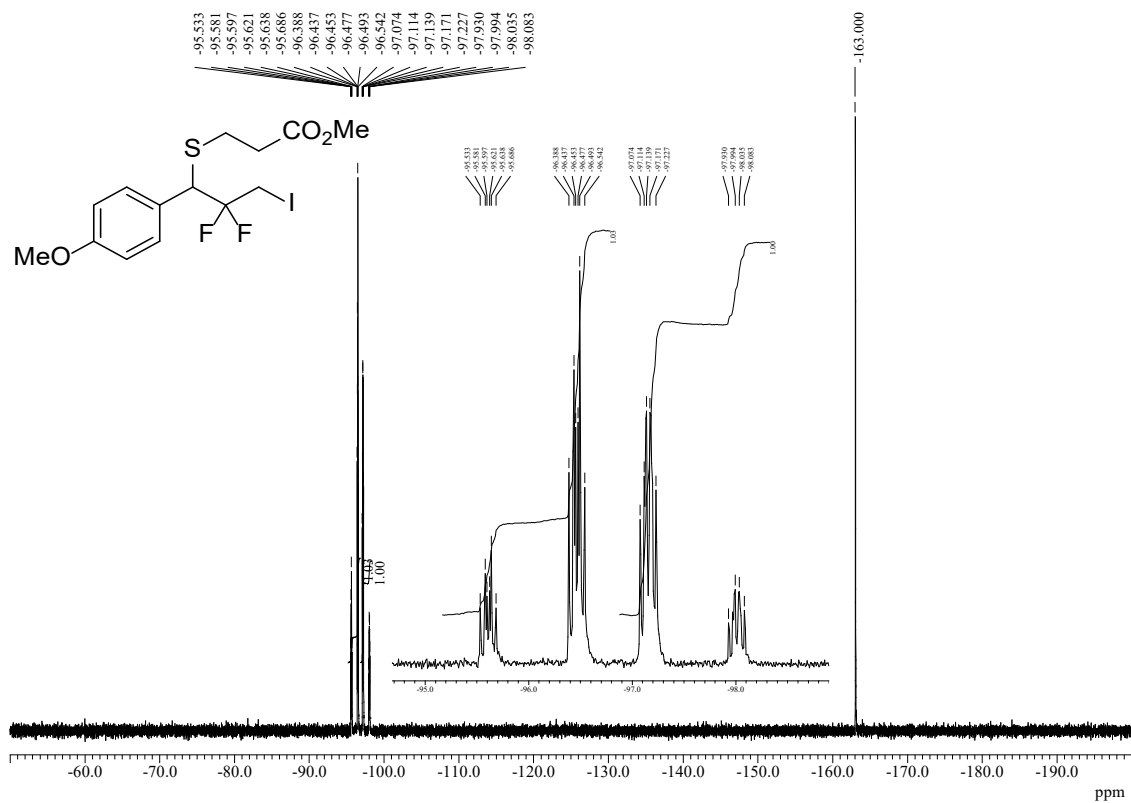

$^1\text{H}$  and  $^{13}\text{C}$  NMR spectra of

*N*-{2-[2,2-difluoro-3-iodo-1-(4-methoxyphenyl)prop-1-yl]sulfenyl}phenyl]benzamide (**7ag**)

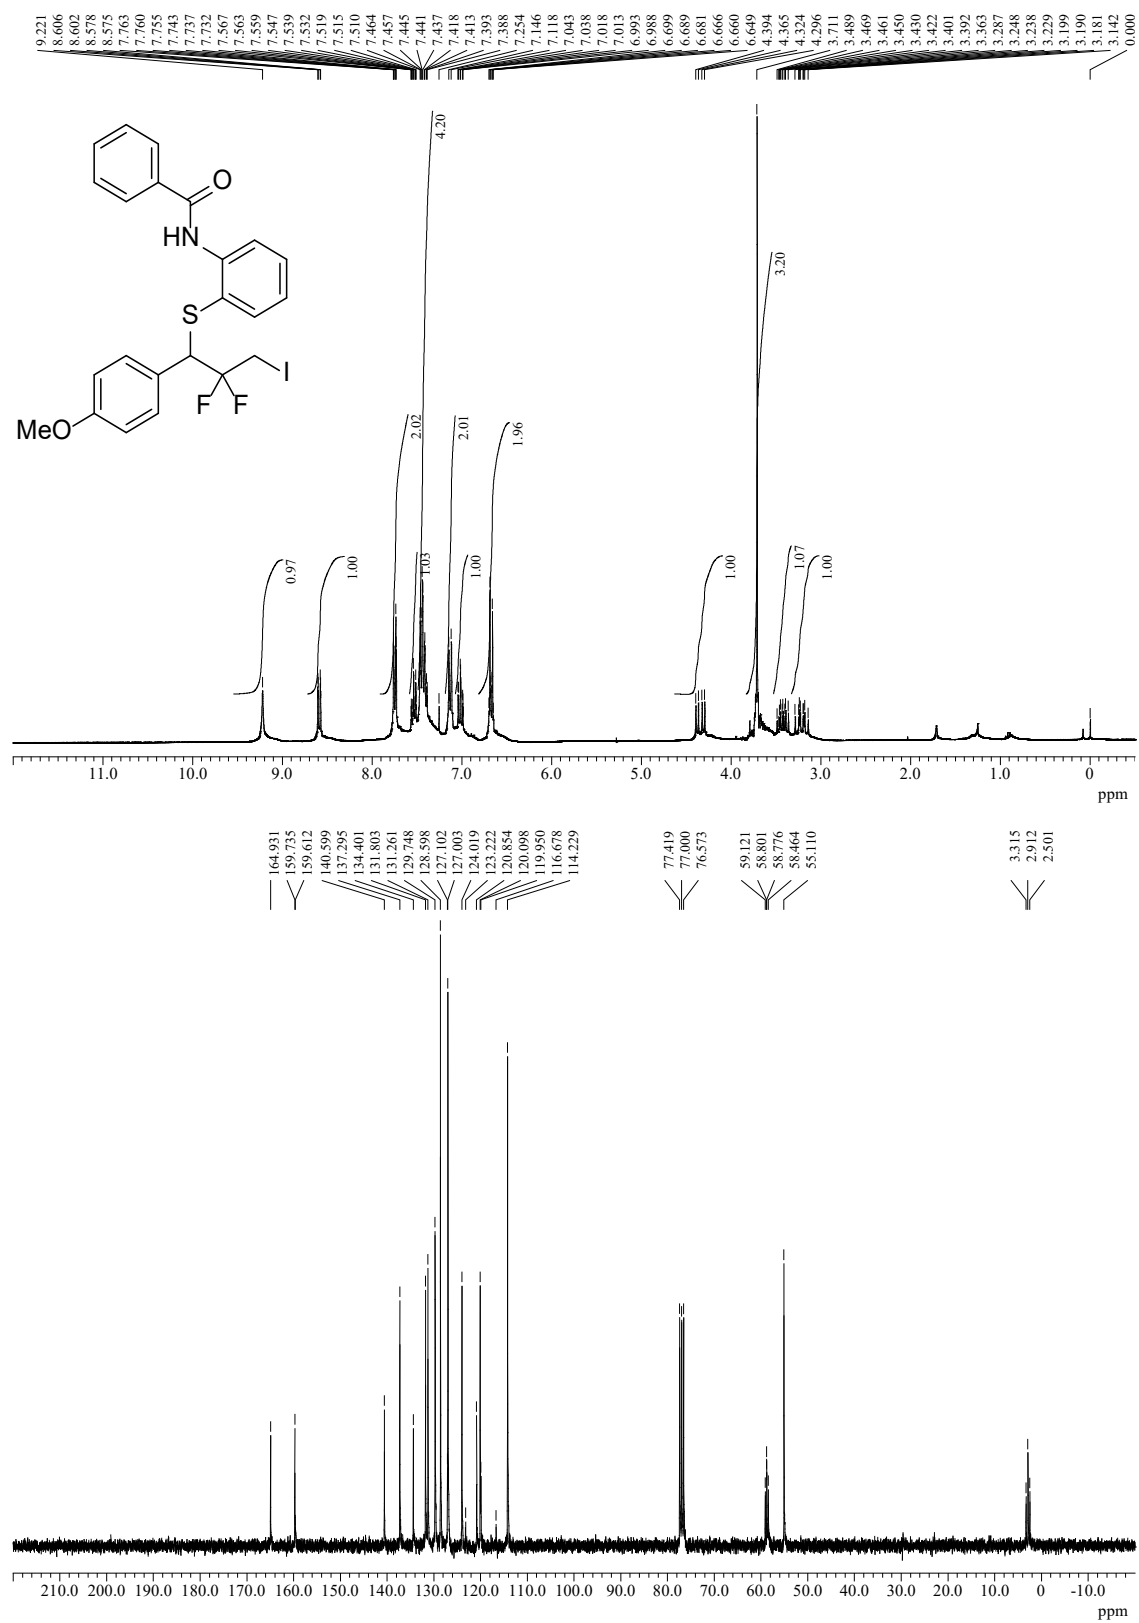

$^{19}\text{F}$  NMR spectrum of

*N*-{2-[2,2-difluoro-3-iodo-1-(4-methoxyphenyl)prop-1-yl]sulfenyl}phenyl]benzamide (**7ag**)

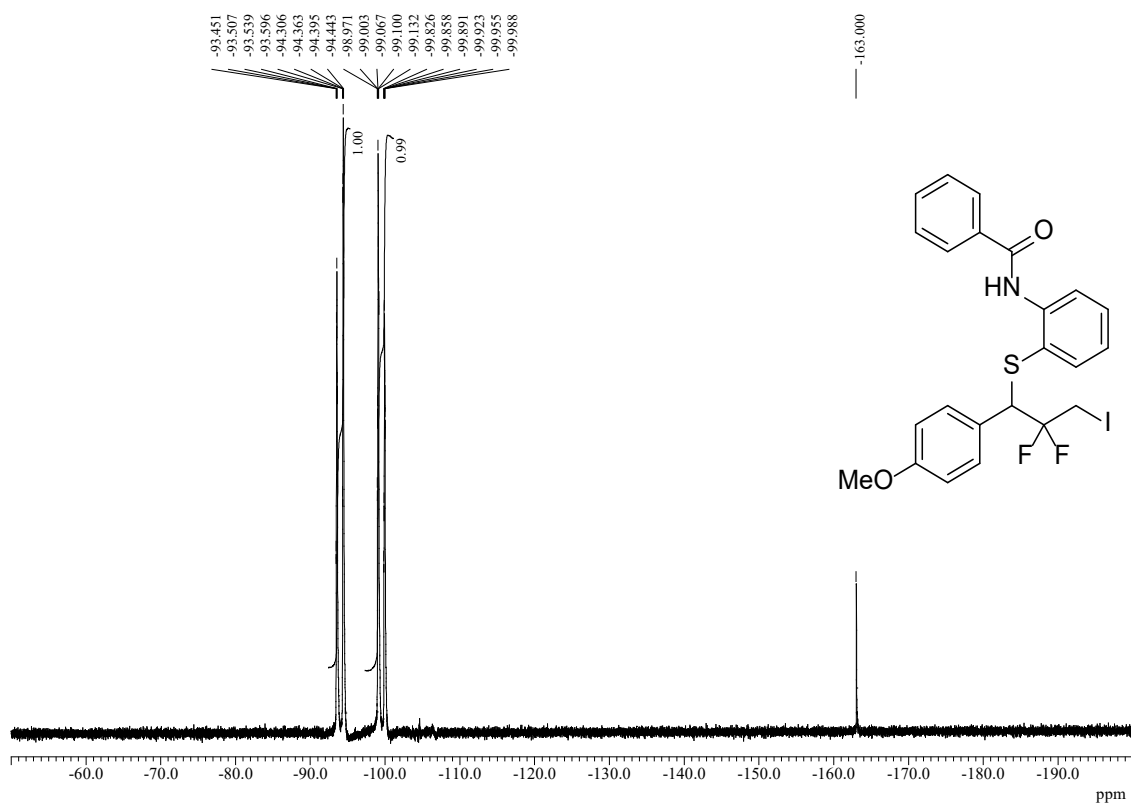

$^1\text{H}$  and  $^{13}\text{C}$  NMR spectra of 4-[1-(benzylsulfenyl)-2,2-difluoro-3-iodo]propyl]phenol (**7ea**)

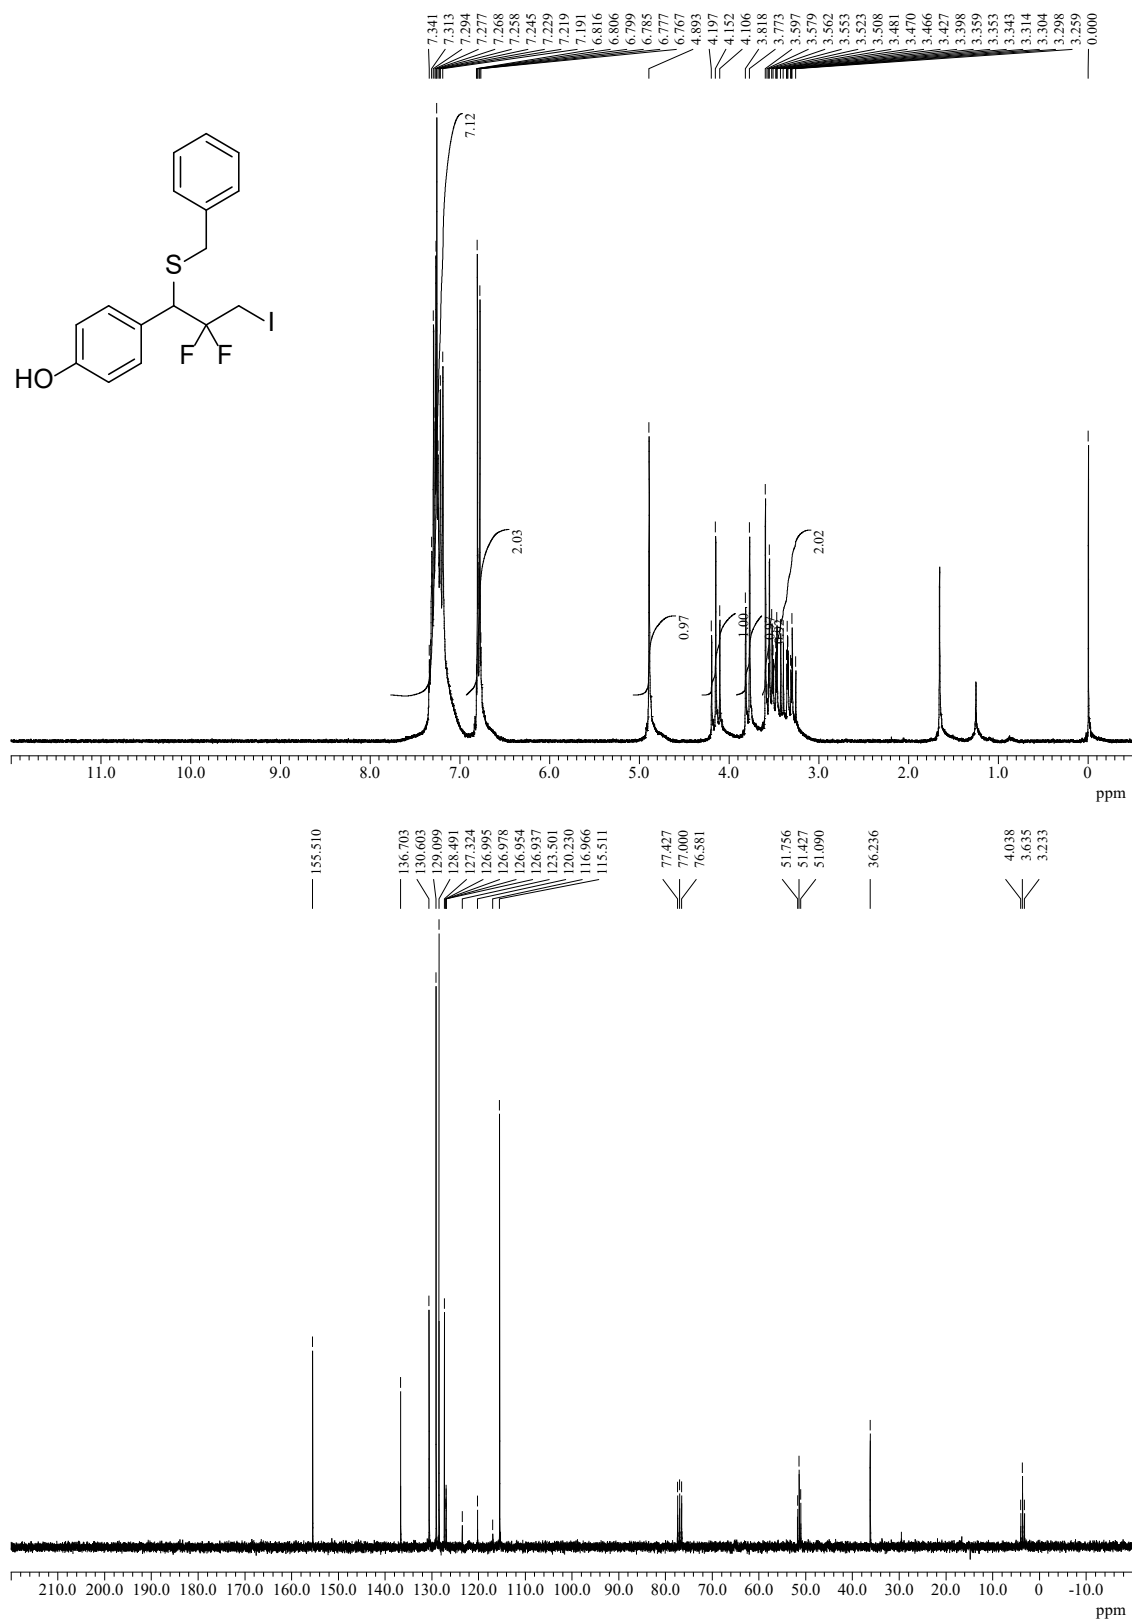

$^{19}\text{F}$  NMR spectrum of 4-[1-(benzylsulfenyl)-2,2-difluoro-3-iodo]propyl]phenol (**7ea**)

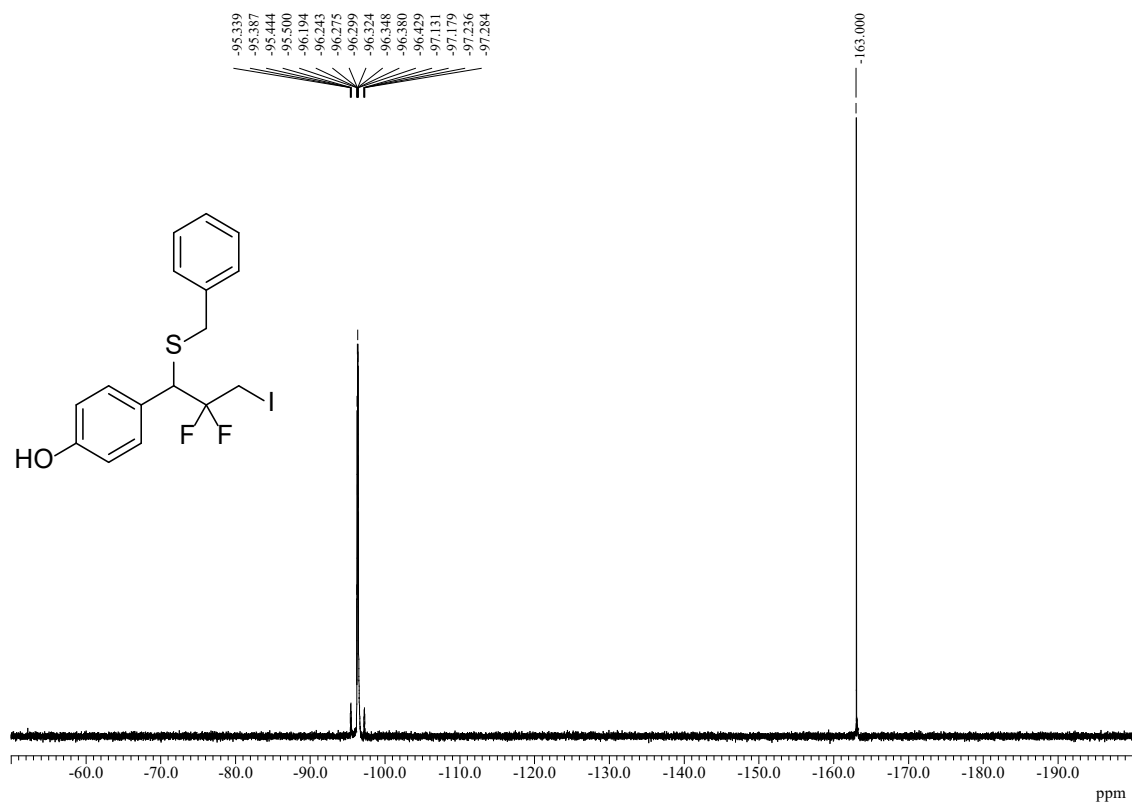

$^1\text{H}$  and  $^{13}\text{C}$  NMR spectra of 1-(2-benzylsulfenyl-3,3-difluoro-4-iodobut-2-yl)-4-methoxybenzene (7ja)

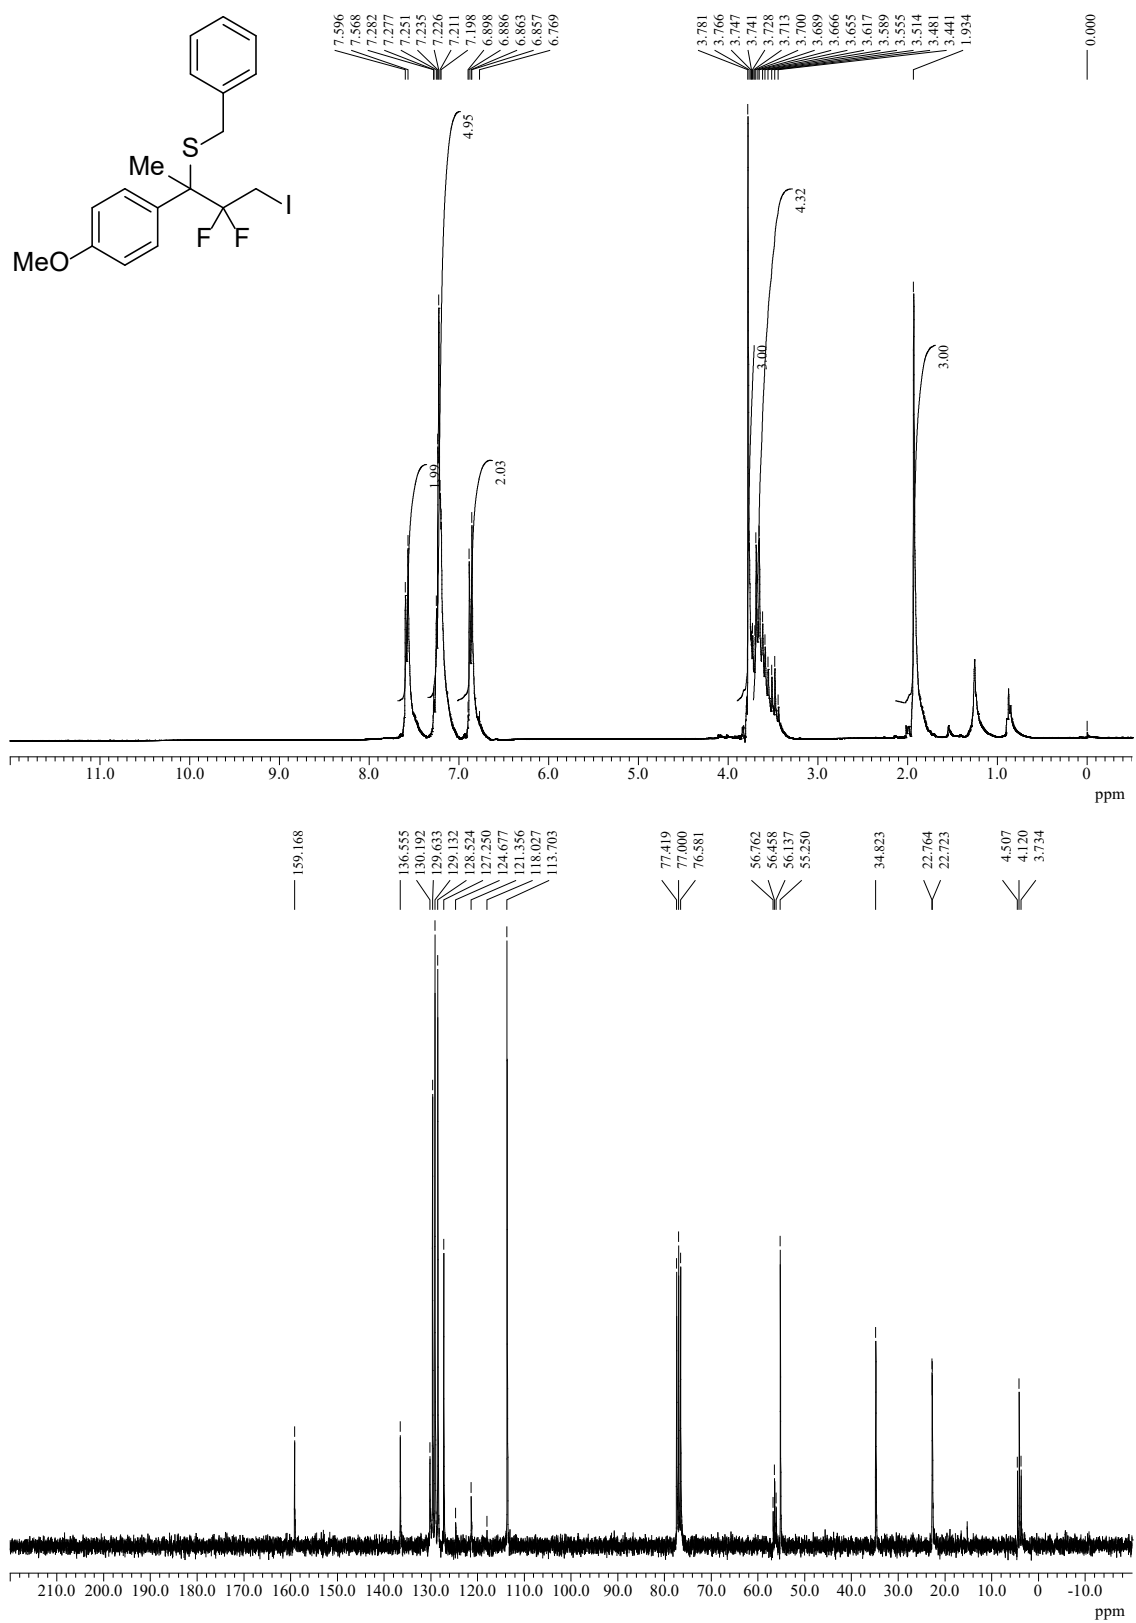



$^{19}\text{F}$  NMR spectrum of 1-(2-benzylsulfenyl-3,3-difluoro-4-iodobut-2-yl)-4-methoxybenzene (**7ja**)

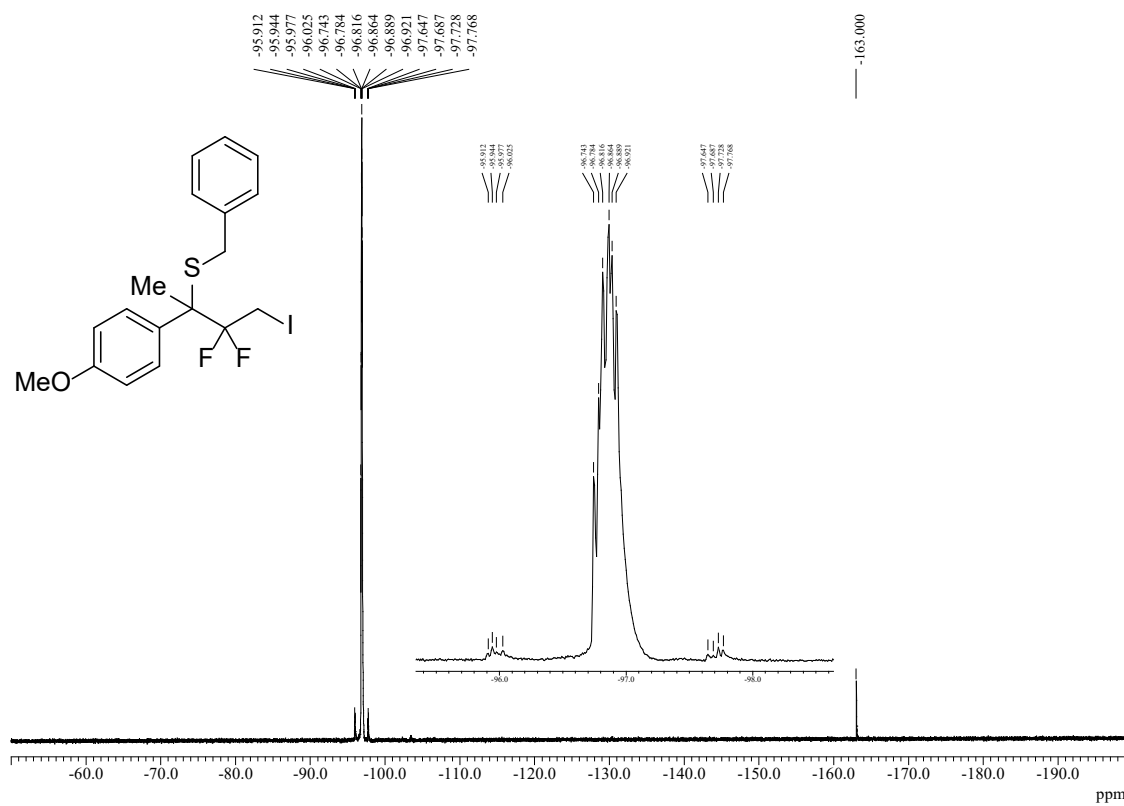

<sup>1</sup>H and <sup>13</sup>C NMR spectra of 1-((1-Benzylsulfonyl-2,2-difluoro-3-iodo)but-1-yl)-4-methoxybenzene (7sa)

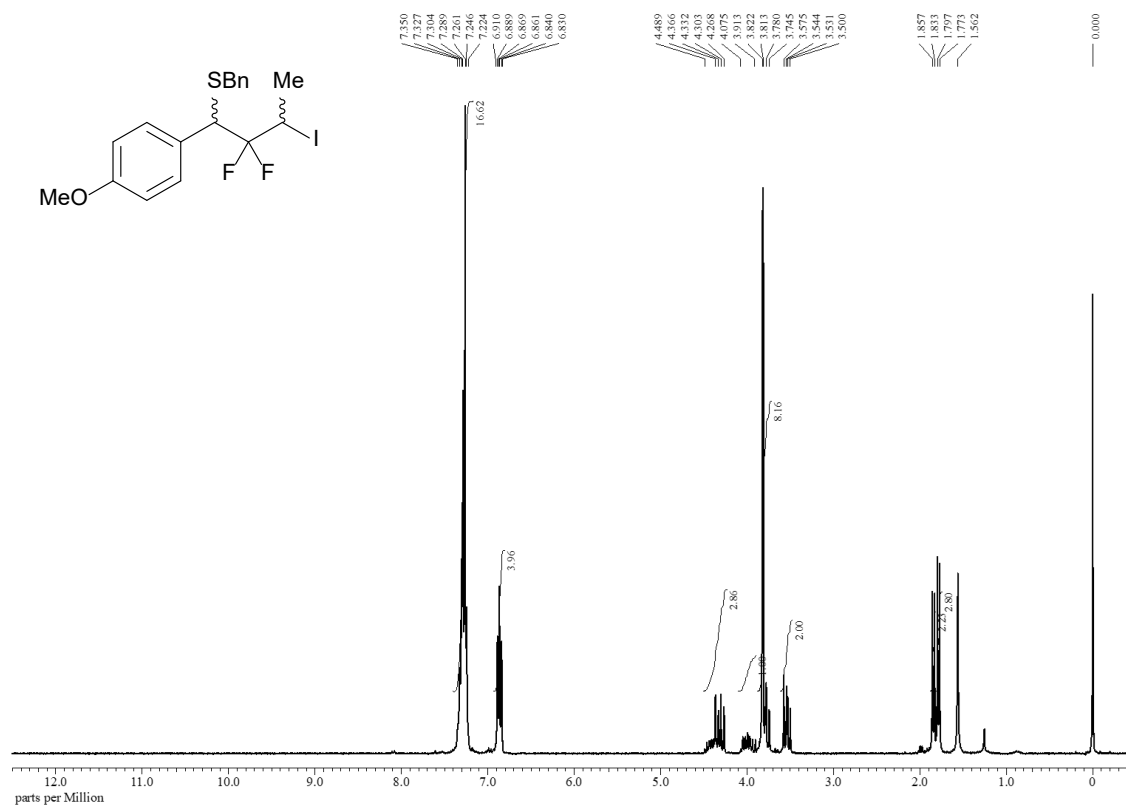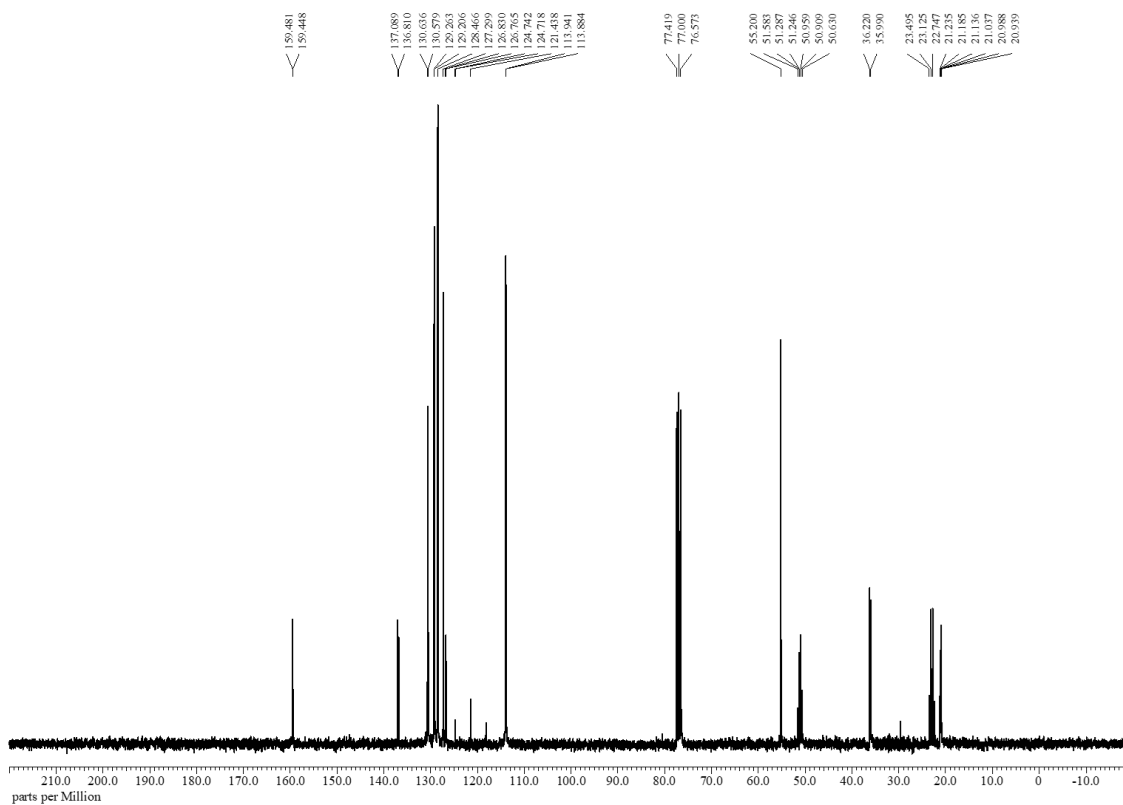

$^{19}\text{F}$  NMR spectrum of 1-((1-Benzylsulfonyl-2,2-difluoro-3-iodo)but-1-yl)-4-methoxybenzene (**7sa**)

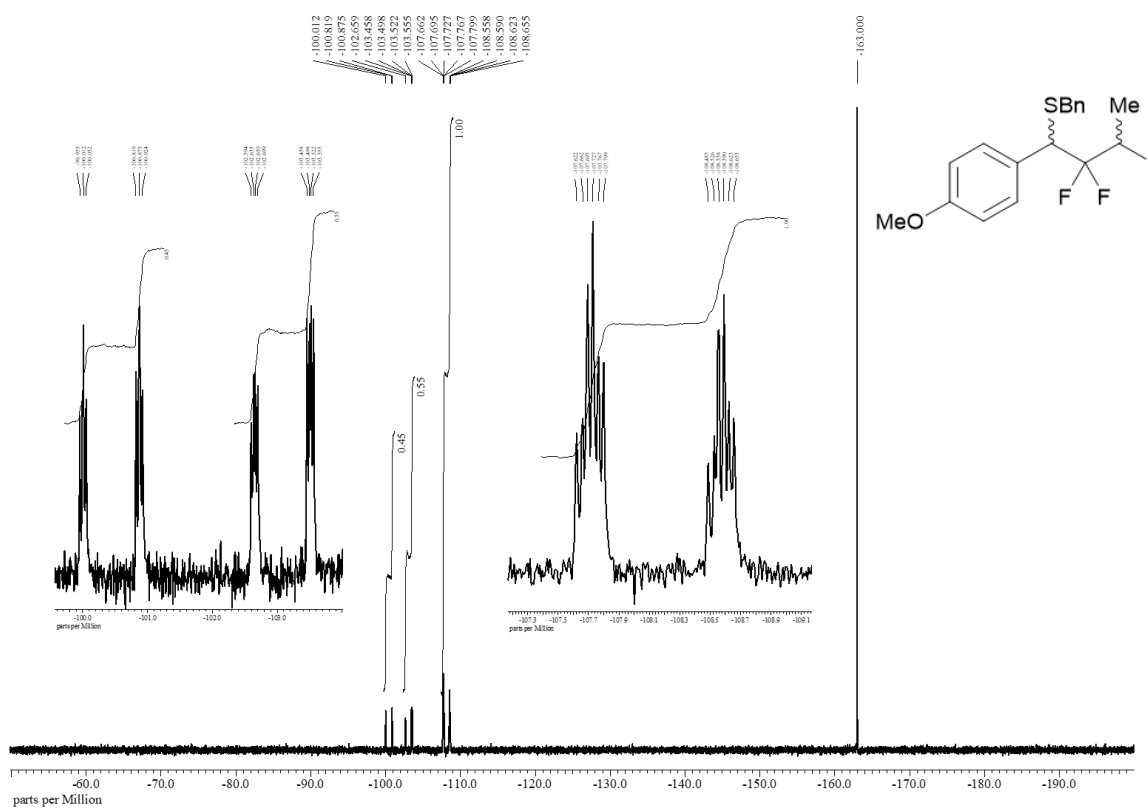

$^1\text{H}$  and  $^{13}\text{C}$  NMR spectra of 4-[2,2-difluoro-3-iodo-1-(4-methoxyphenyl)prop-1-yl]phenol (**8aa**)

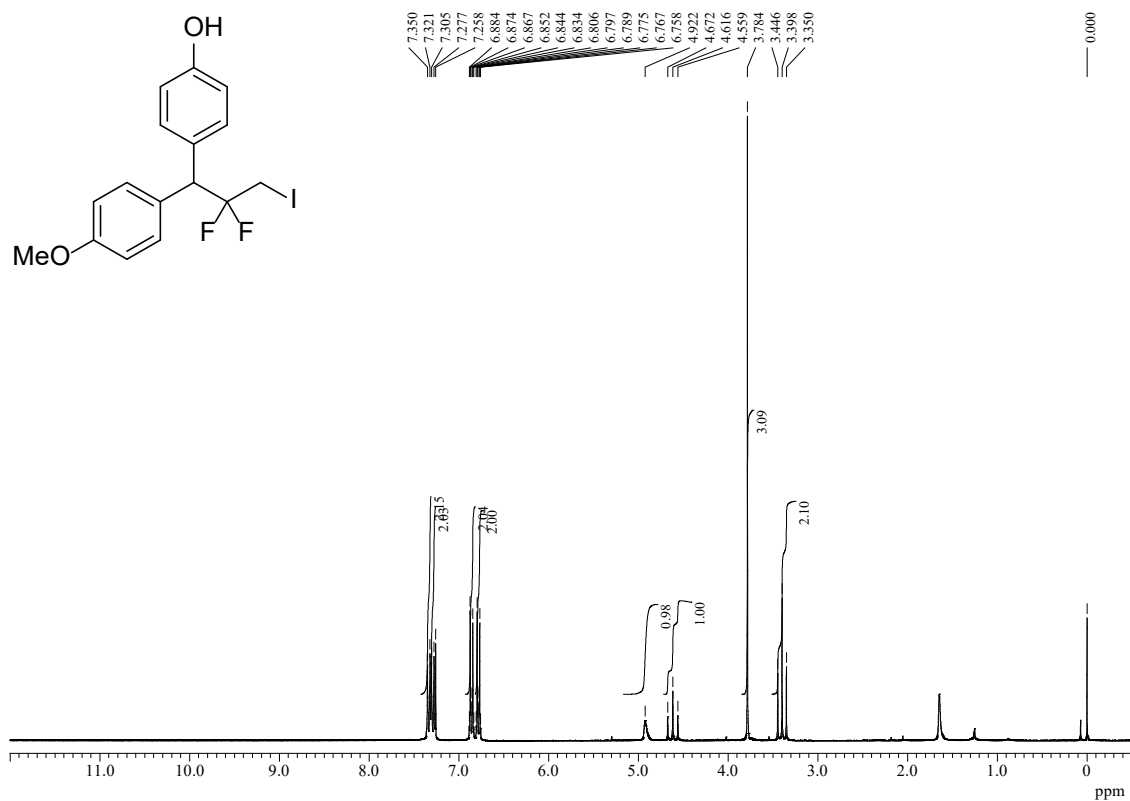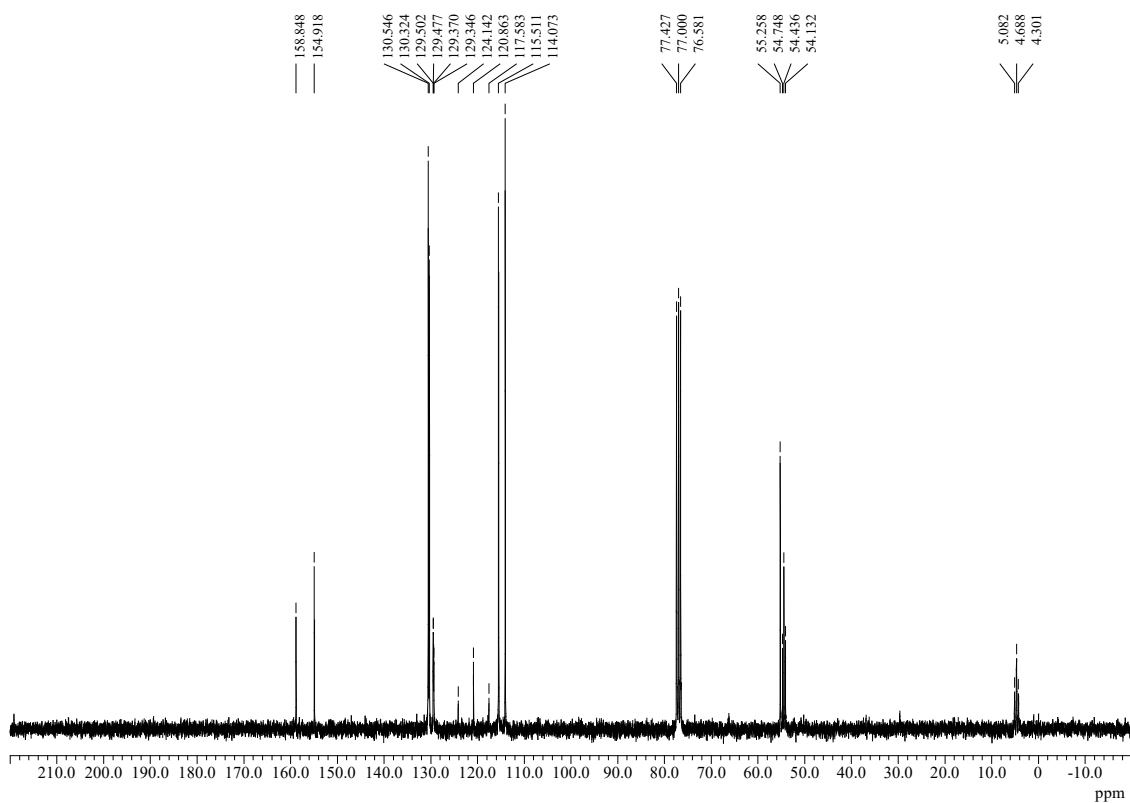

$^{19}\text{F}$  NMR spectrum of 4-[2,2-difluoro-3-iodo-1-(4-methoxyphenyl)prop-1-yl]phenol (**8aa**)

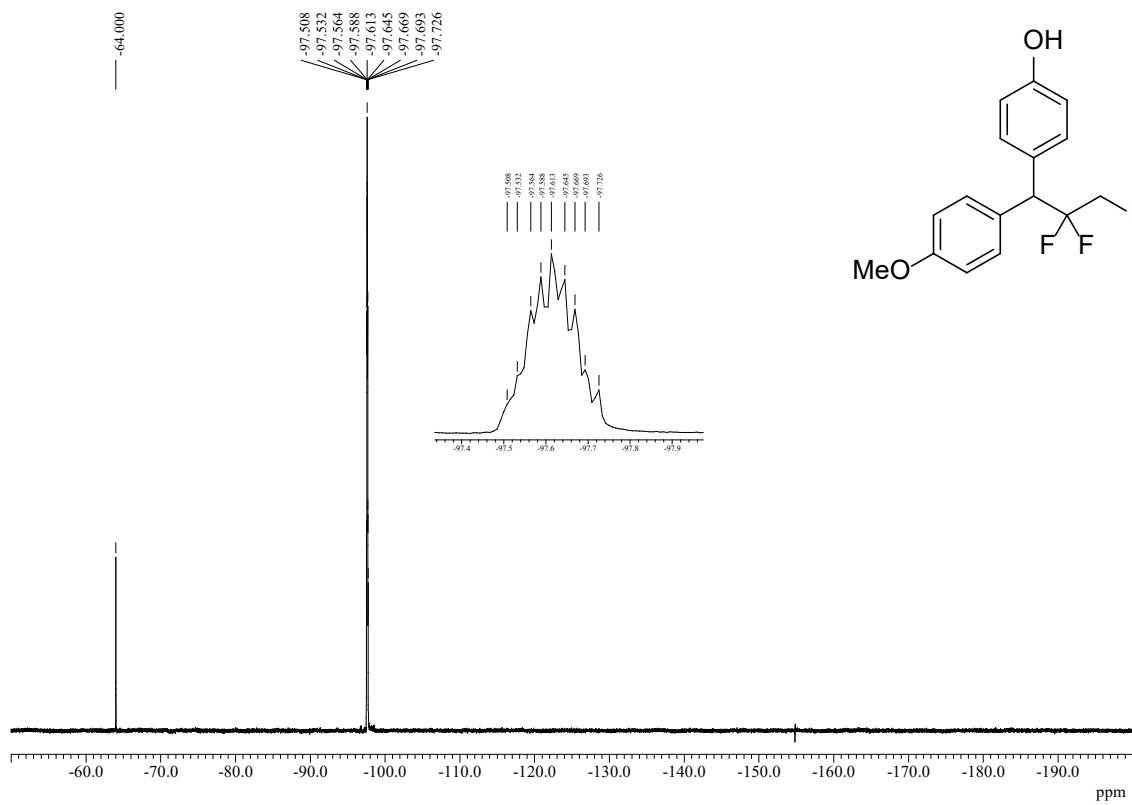

$^1\text{H}$  and  $^{13}\text{C}$  NMR spectra of 2,2-difluoro-3-iodo-1,1-bis(4-methoxyphenyl)propane (**8ab**)

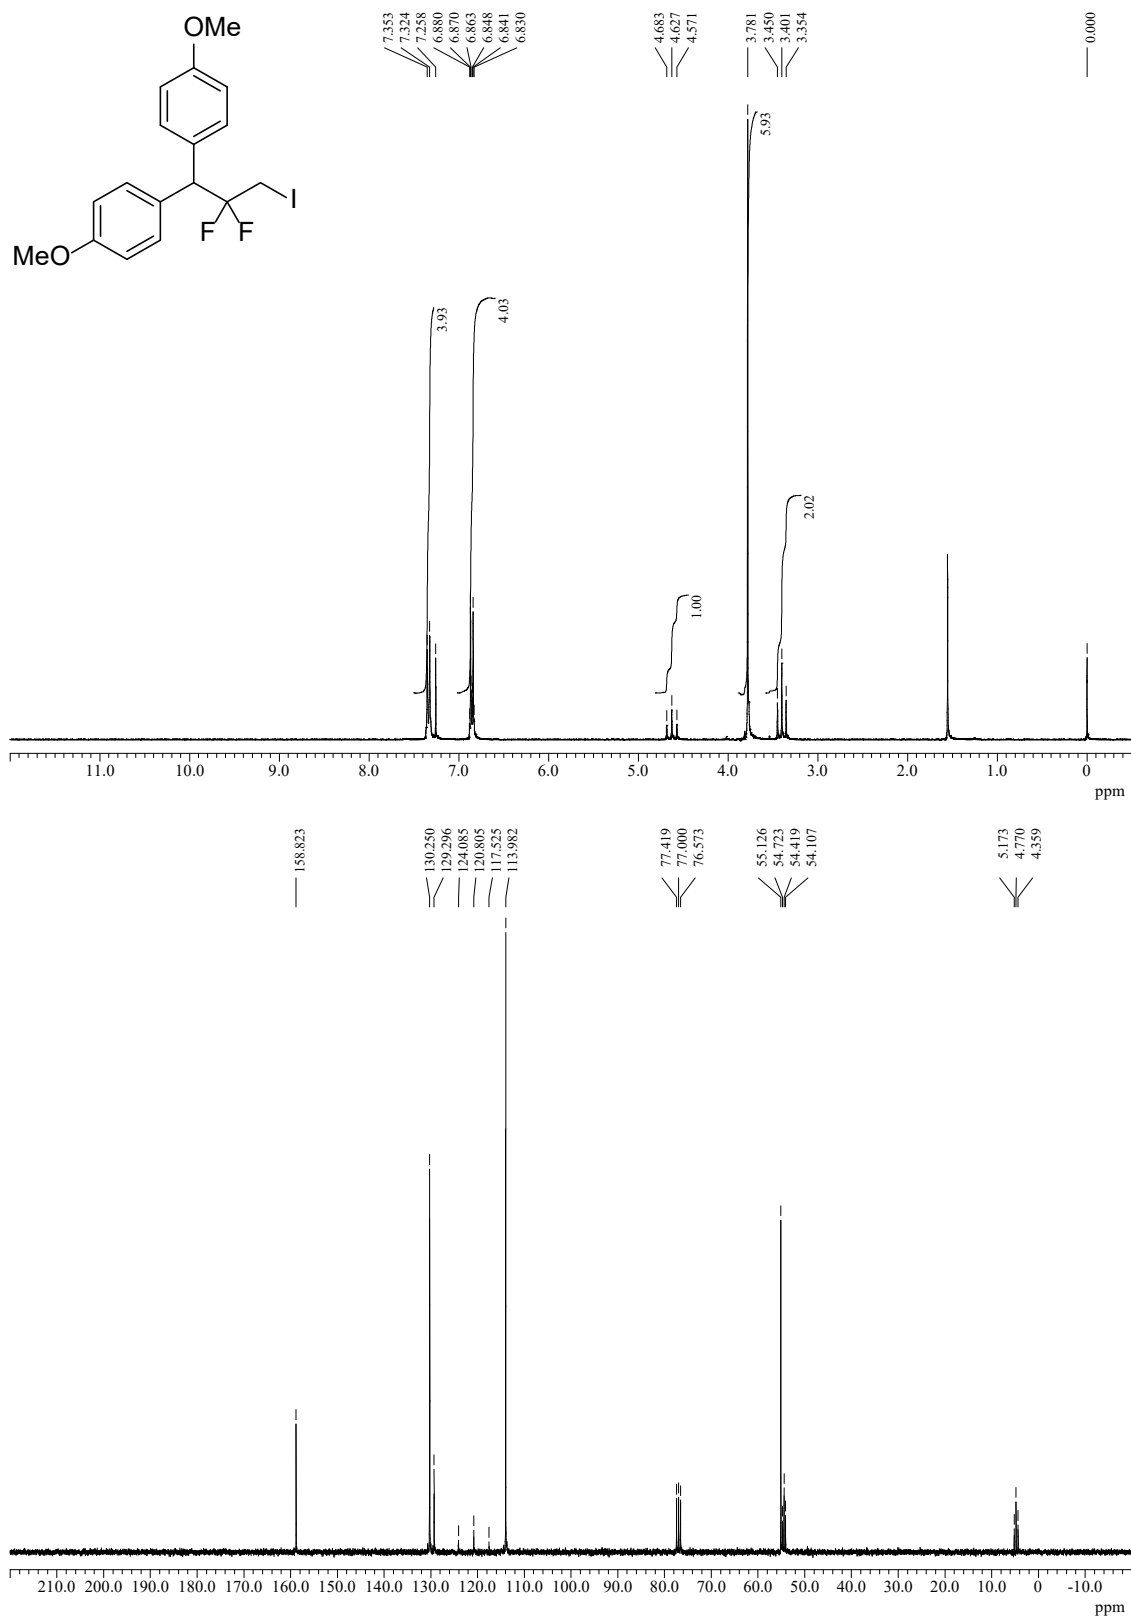

$^{19}\text{F}$  NMR spectrum of 2,2-difluoro-3-iodo-1,1-bis(4-methoxyphenyl)propane (**8ab**)

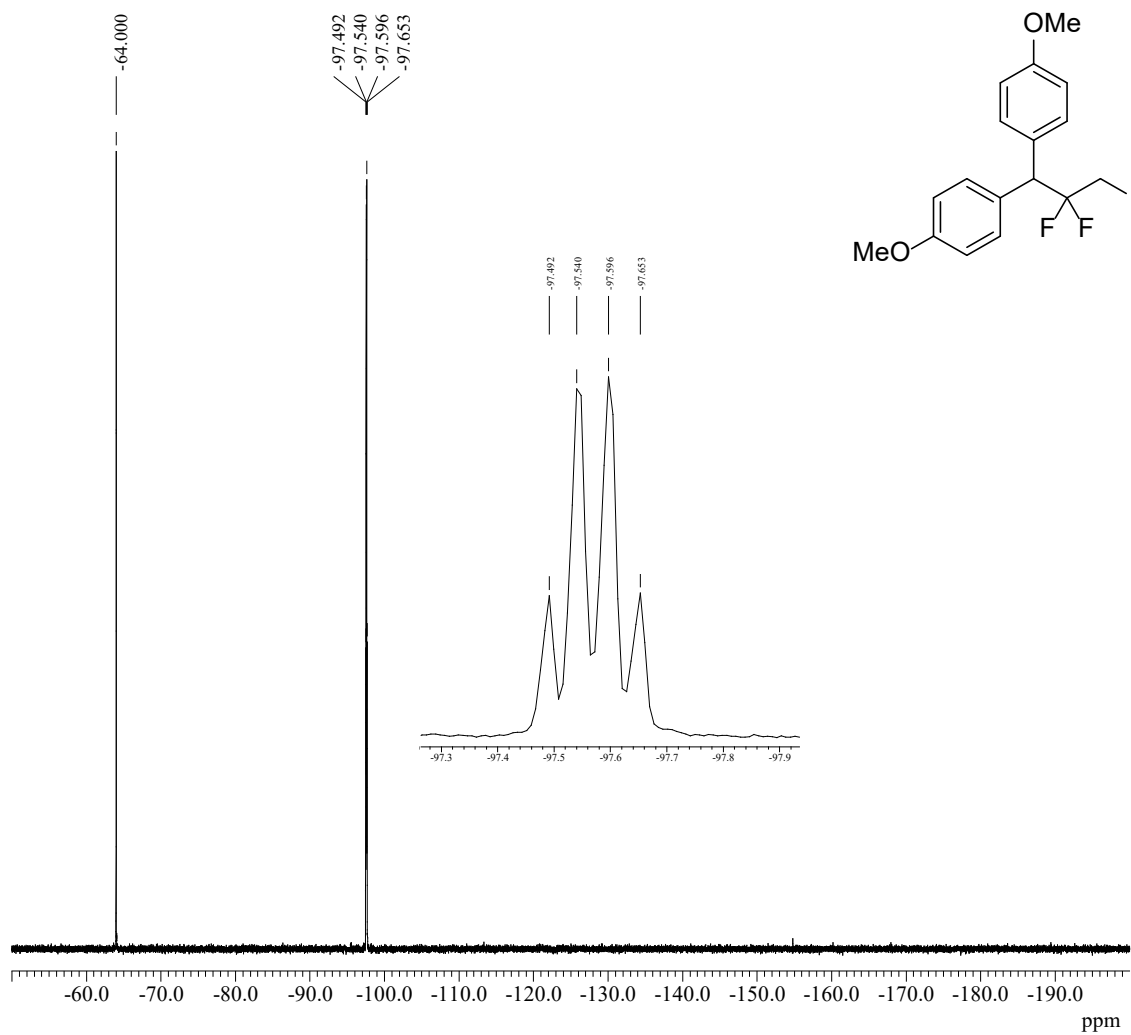

$^1\text{H}$  and  $^{13}\text{C}$  NMR spectra of 1-[2,2-difluoro-3-iodo-1-(4-methylphenyl)prop-1-yl]-4-methoxybenzene (**8ac**)

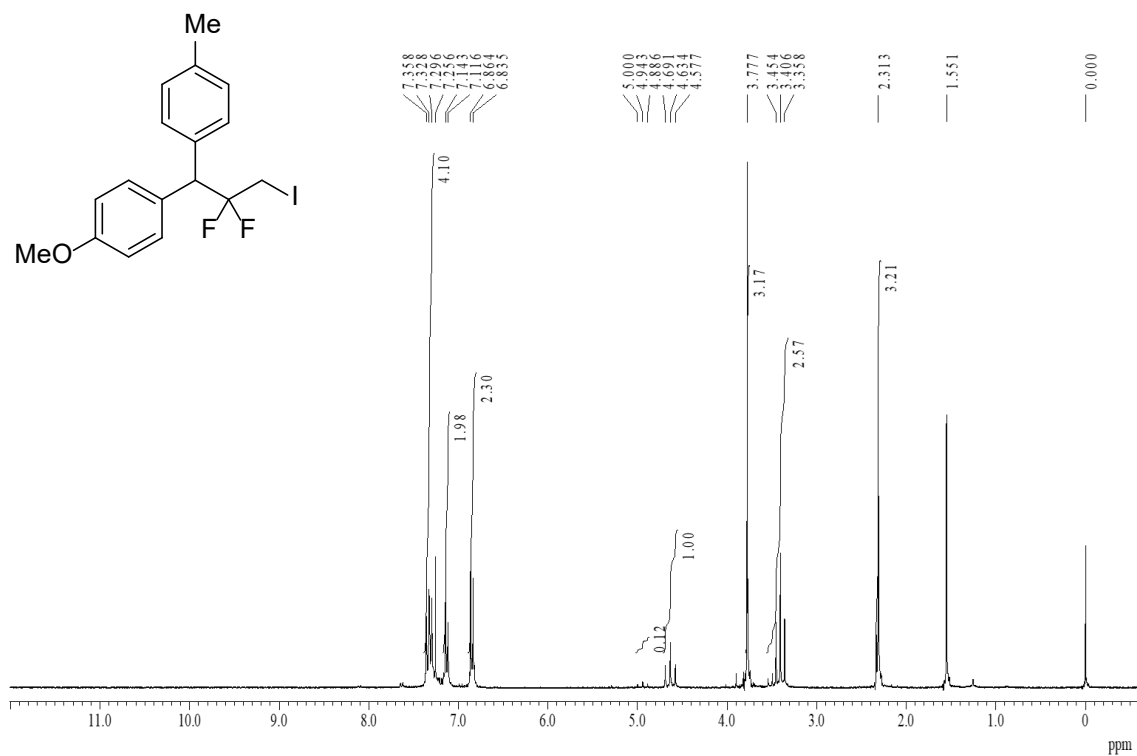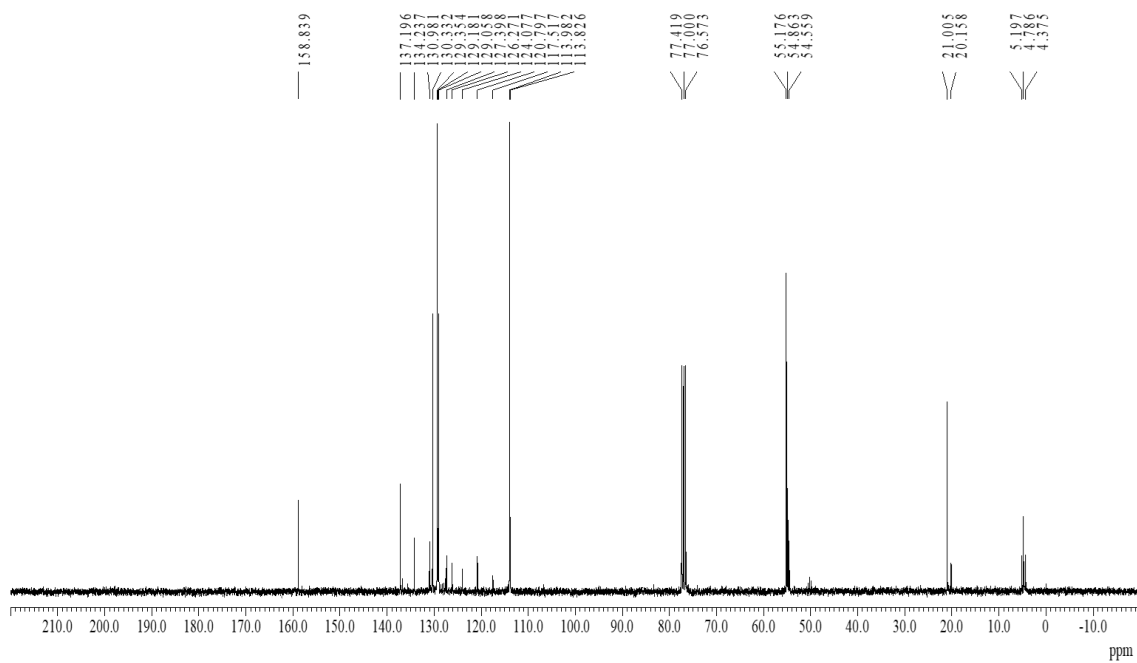



$^{19}\text{F}$  NMR spectrum of 1-[2,2-difluoro-3-iodo-1-(4-methylphenyl)prop-1-yl]-4-methoxybenzene (**8ac**)

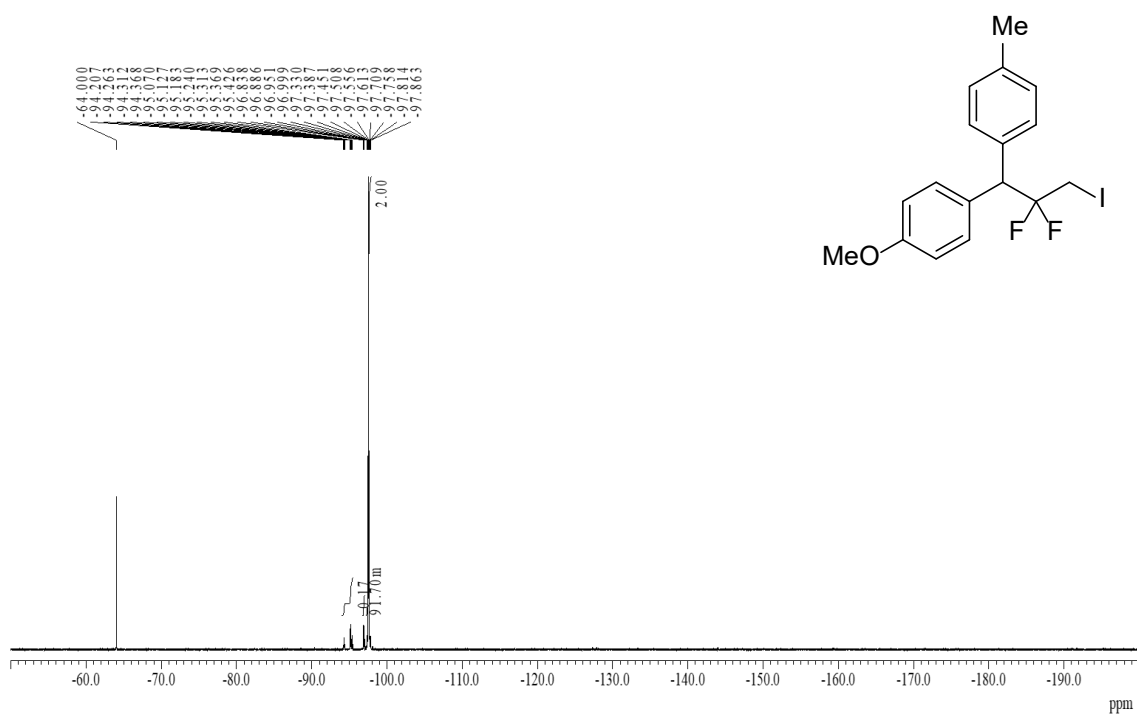

$^1\text{H}$  and  $^{13}\text{C}$  NMR spectra of 4-[2,2-difluoro-3-iodo-1-(4-methoxyphenyl)prop-1-yl]-2,6-dimethylphenol (**8ad**)

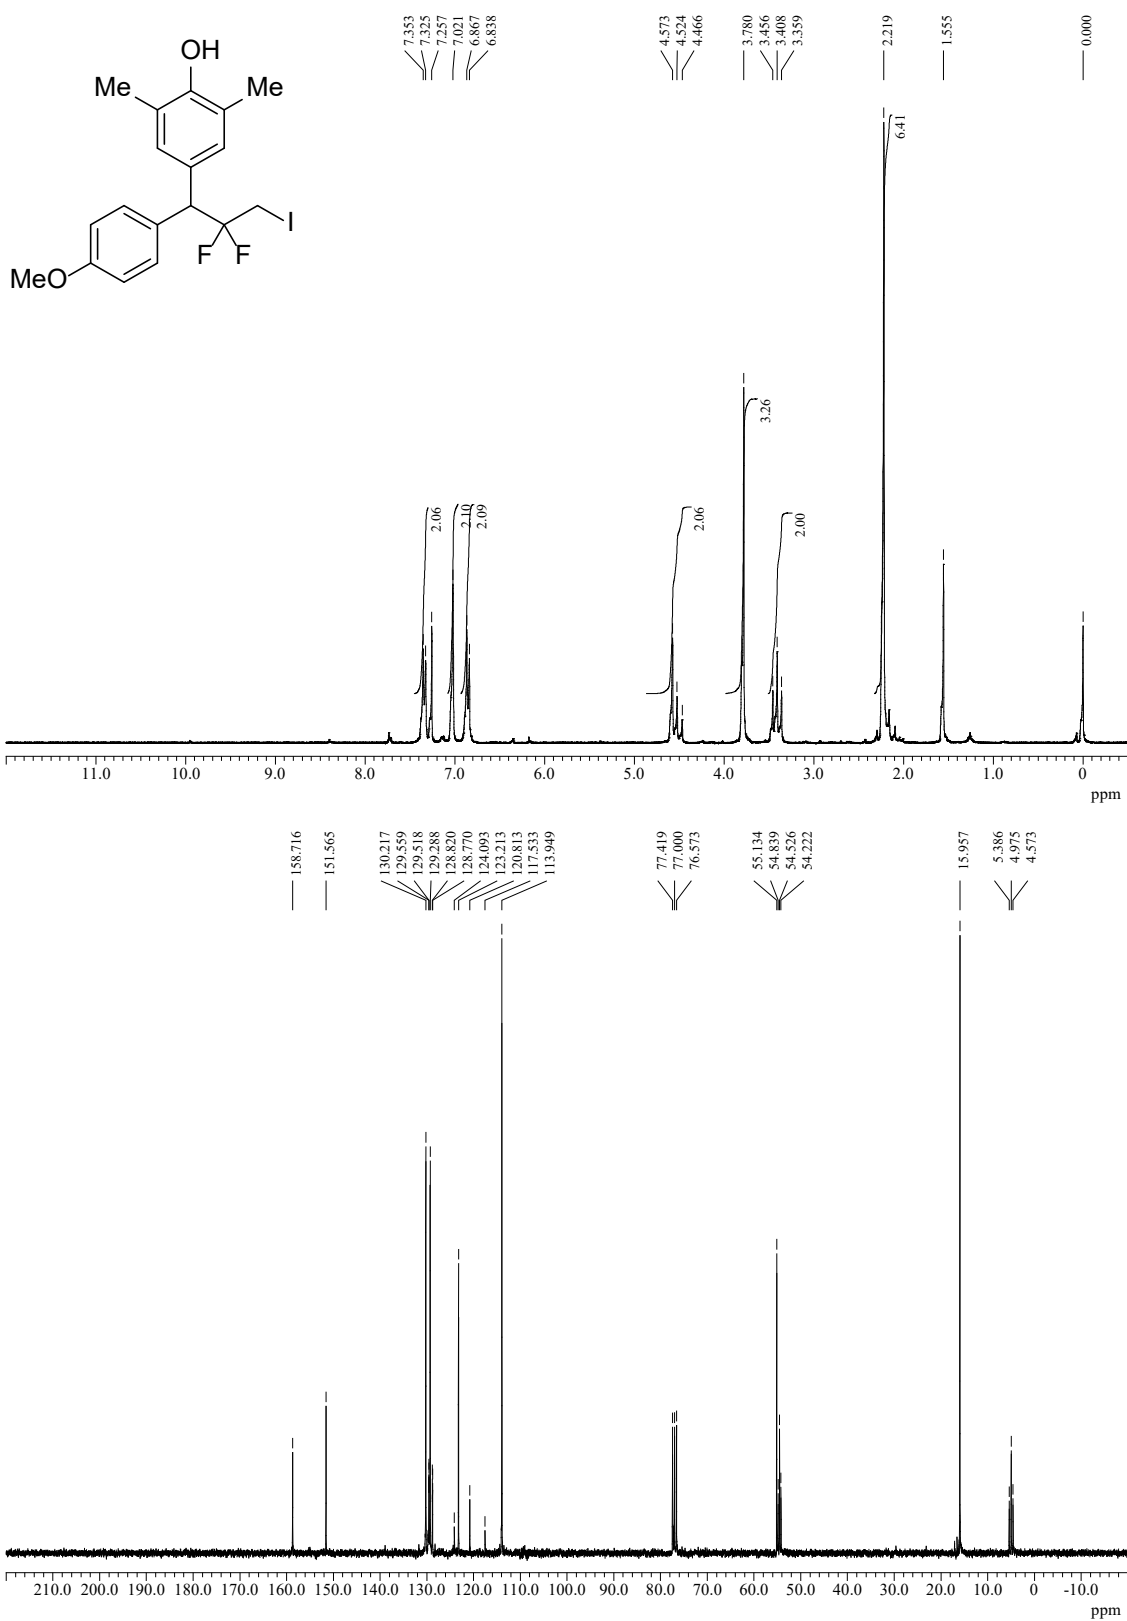

$^{19}\text{F}$  NMR spectrum of 4-[2,2-difluoro-3-iodo-1-(4-methoxyphenyl)prop-1-yl]-2,6-dimethylphenol  
(8ad)

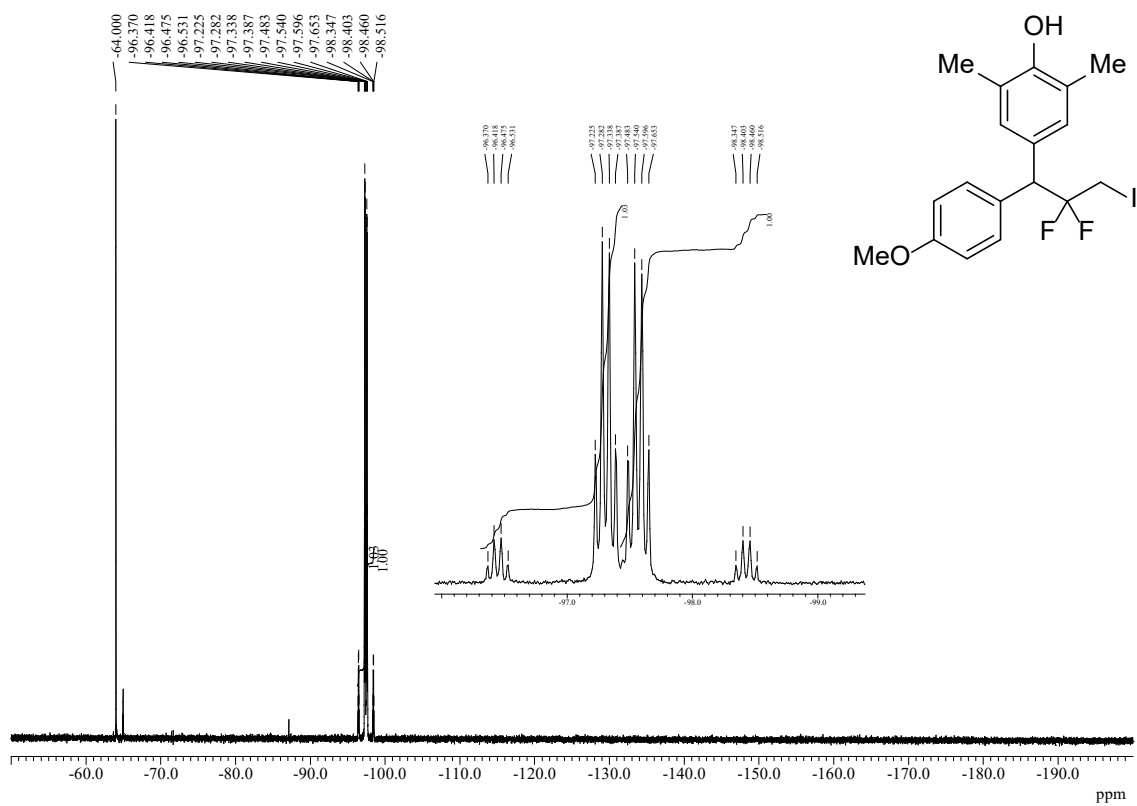

$^1\text{H}$  and  $^{13}\text{C}$  NMR spectra of 2-[2,2-difluoro-3-iodo-1-(4-methoxyphenyl)prop-1-yl]furan (**8ae**)

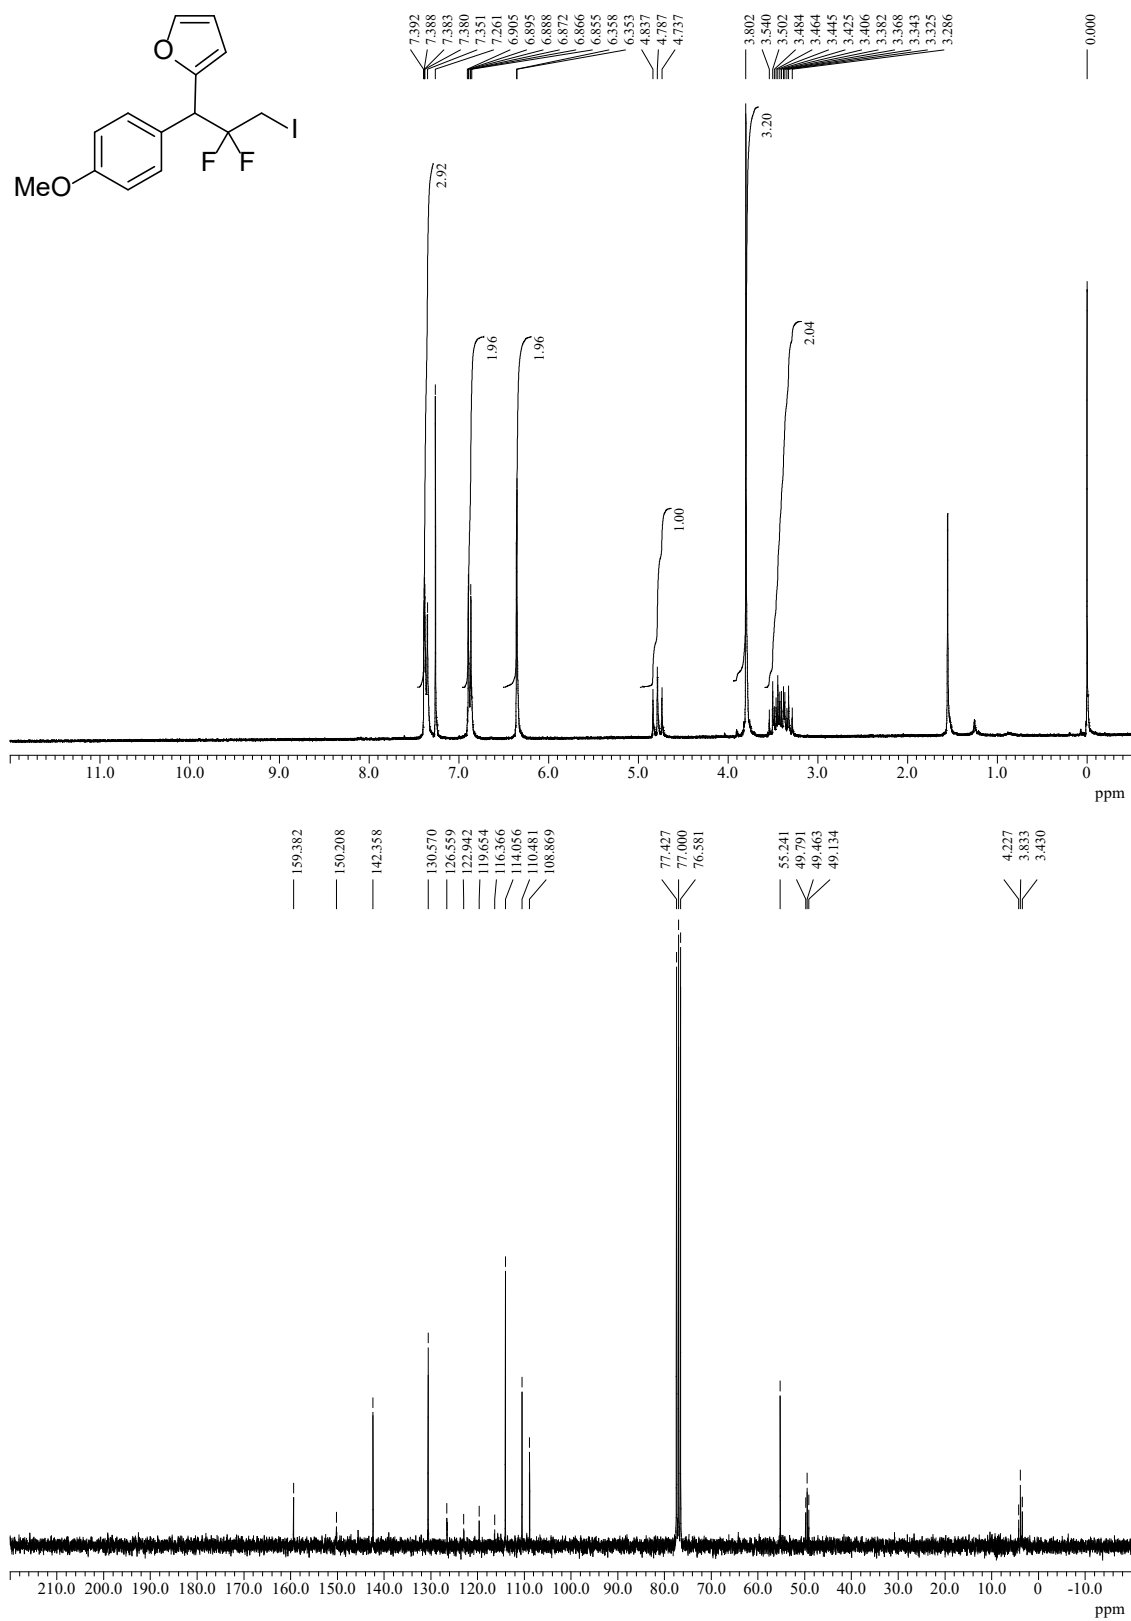

$^{19}\text{F}$  NMR spectrum of 2-[2,2-difluoro-3-iodo-1-(4-methoxyphenyl)prop-1-yl]furan (**8ae**)

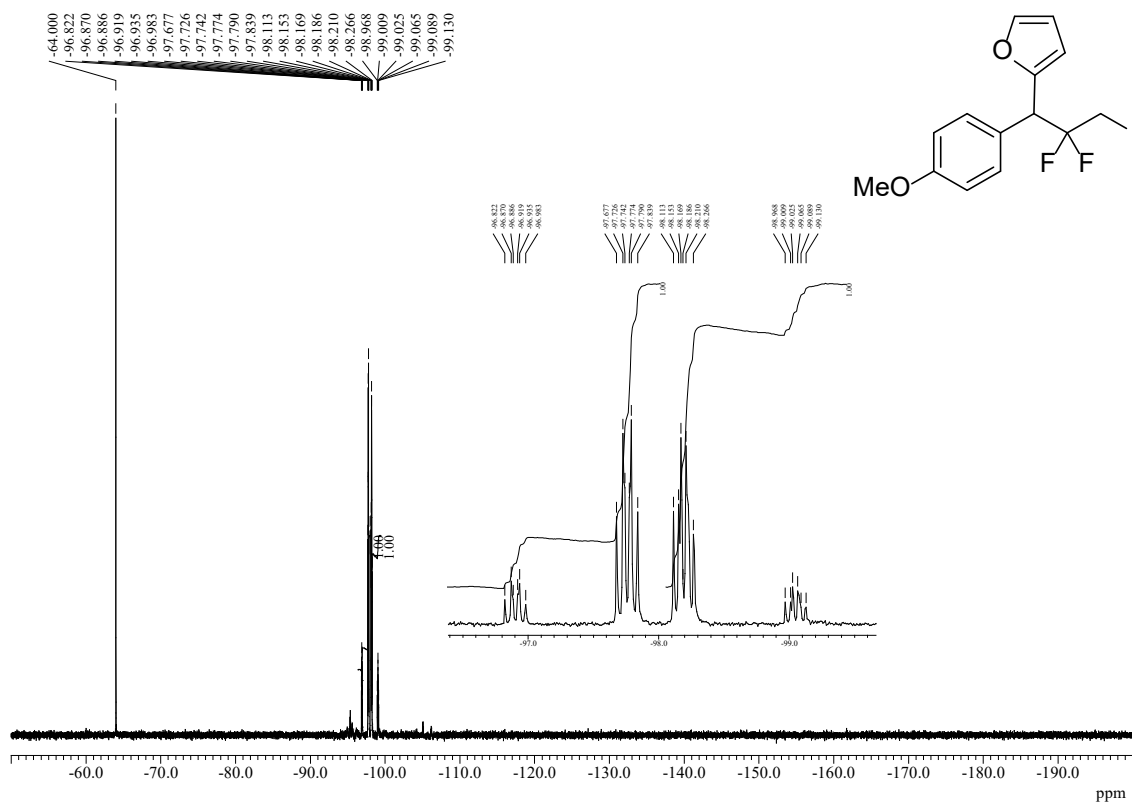

<sup>1</sup>H and <sup>13</sup>C NMR spectra of 2-[2,2-difluoro-3-iodo-1-(4-methoxyphenyl)prop-1-yl]thiophene (**8af**)

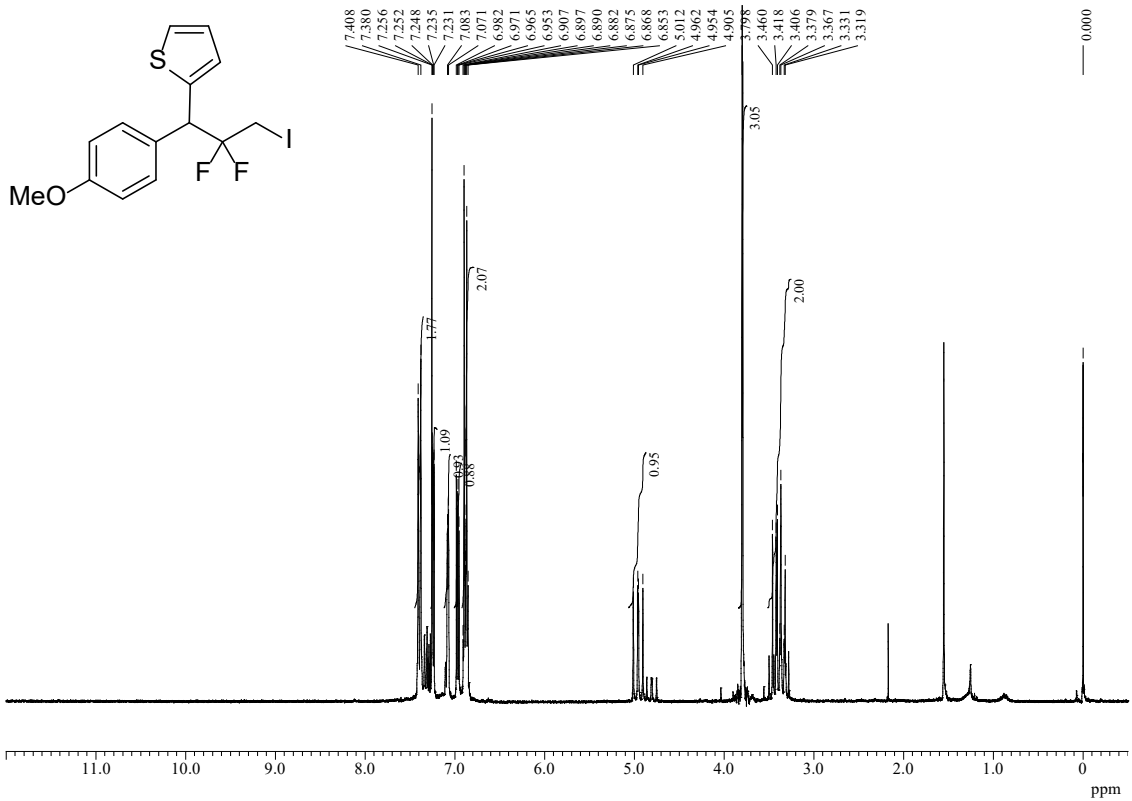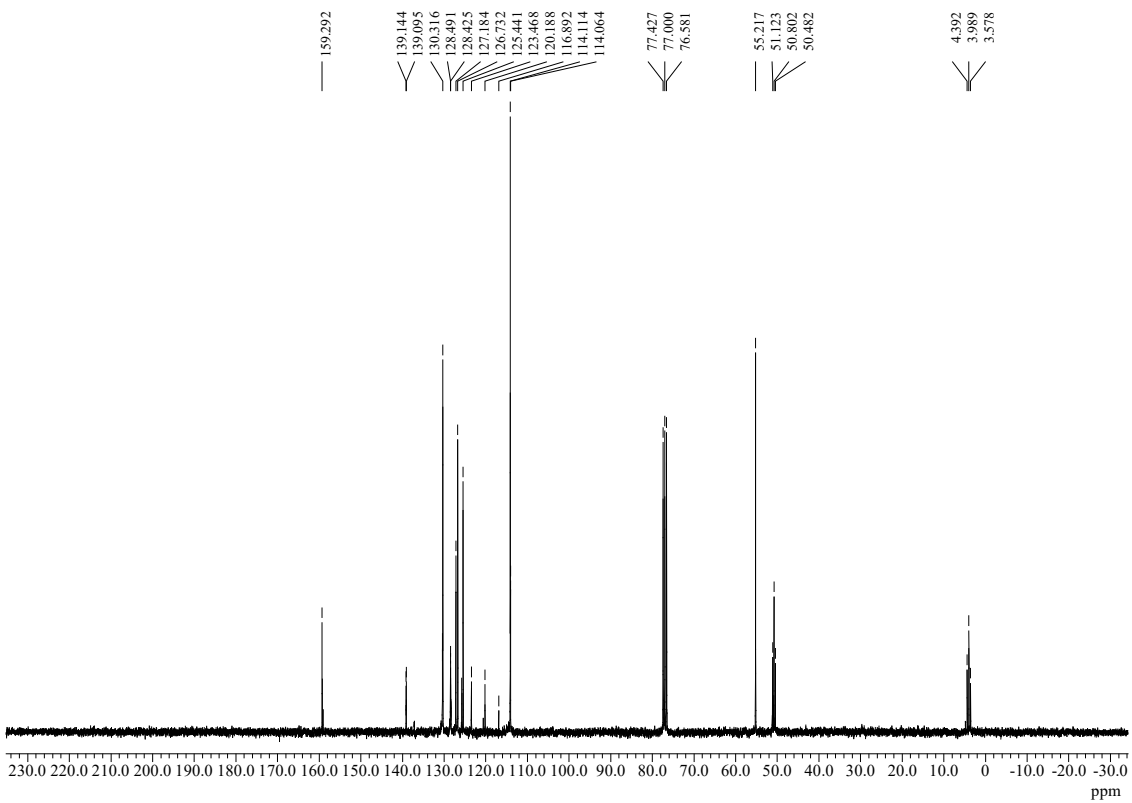

$^{19}\text{F}$  NMR spectrum of 2-[2,2-difluoro-3-iodo-1-(4-methoxyphenyl)prop-1-yl]thiophene (**8af**)

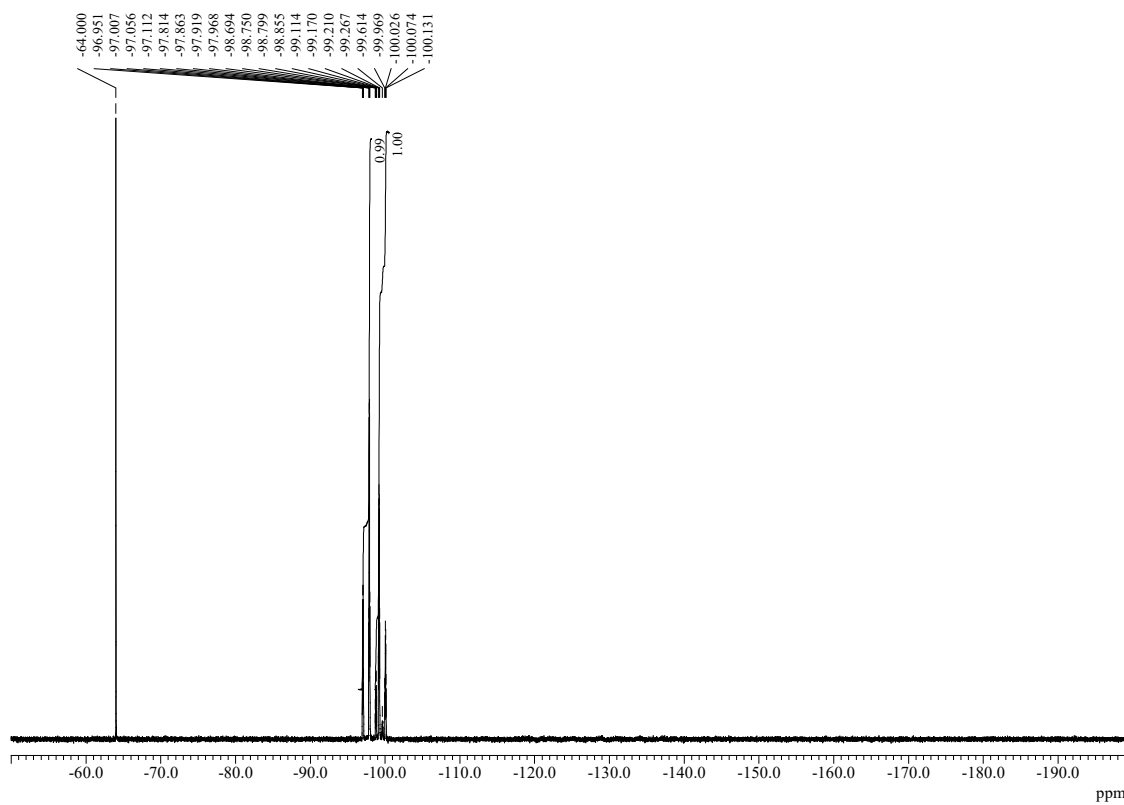

$^1\text{H}$  and  $^{13}\text{C}$  NMR spectra of 2-[2,2-difluoro-3-iodo-1-(4-methoxyphenyl)prop-1-yl]-4,5-dimethylphenol (**8ag**)

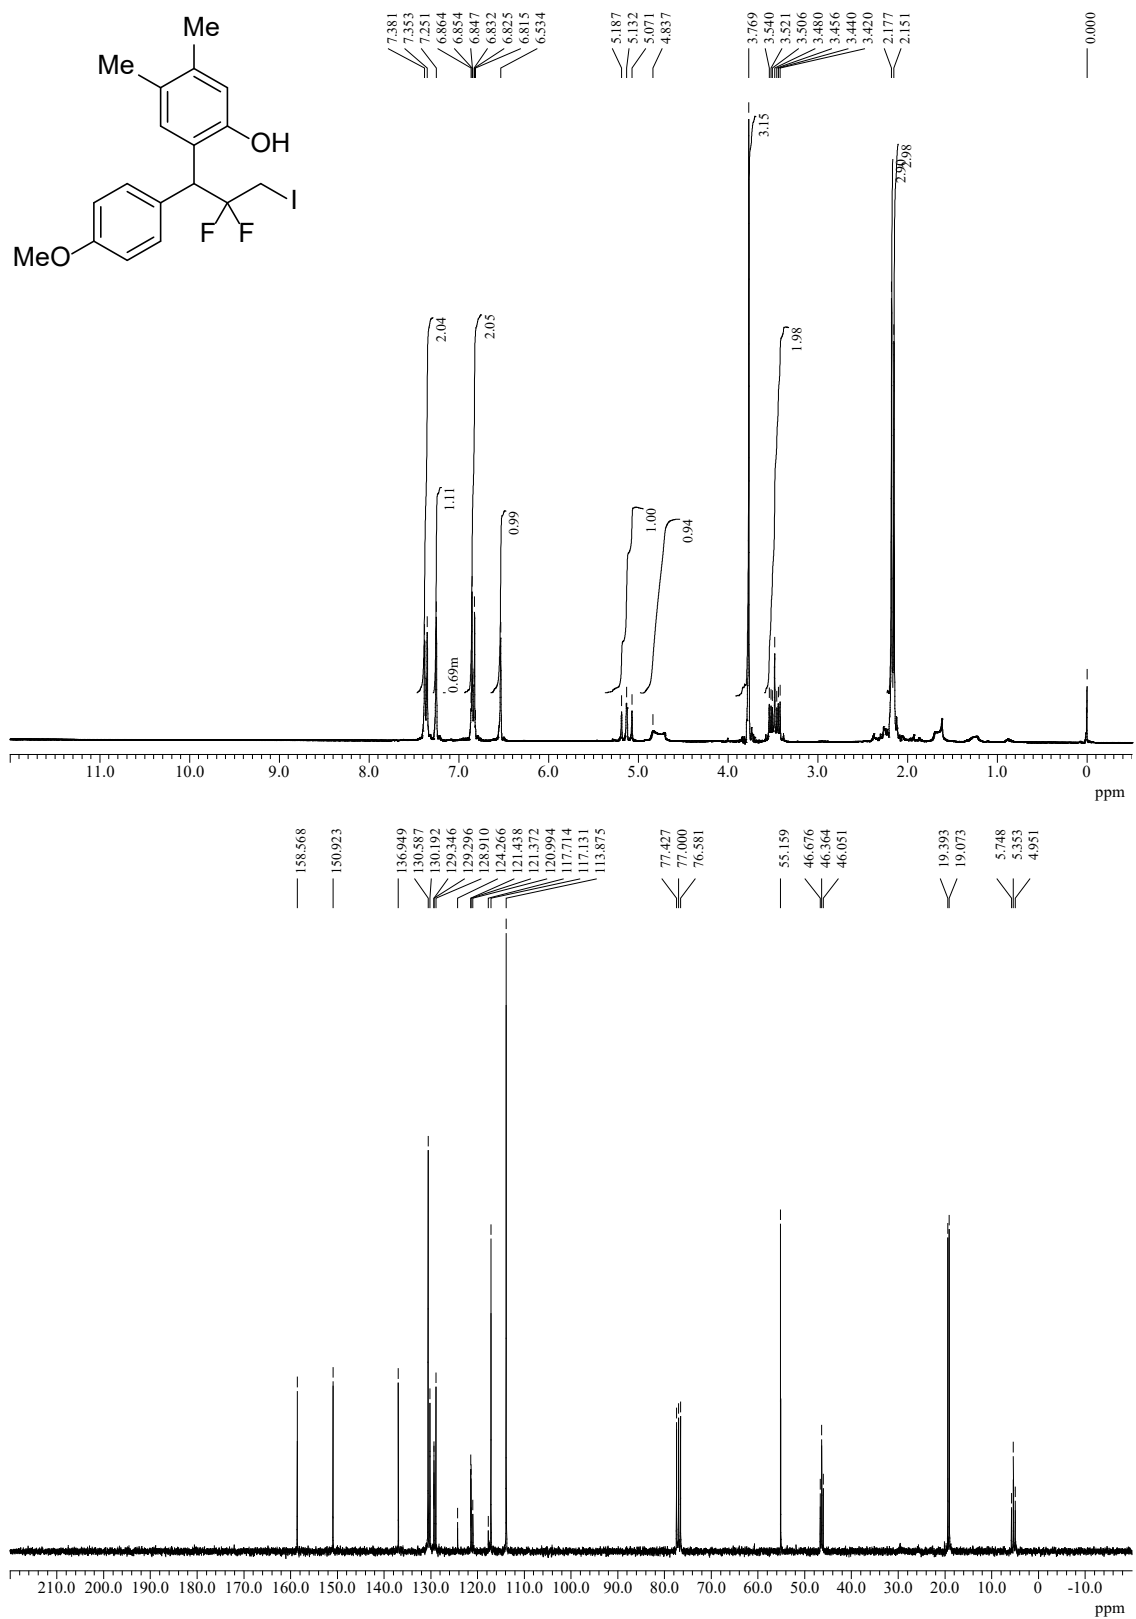



<sup>19</sup>F NMR spectrum of 2-[2,2-difluoro-3-iodo-1-(4-methoxyphenyl)prop-1-yl]-4,5-dimethylphenol

(8ag)

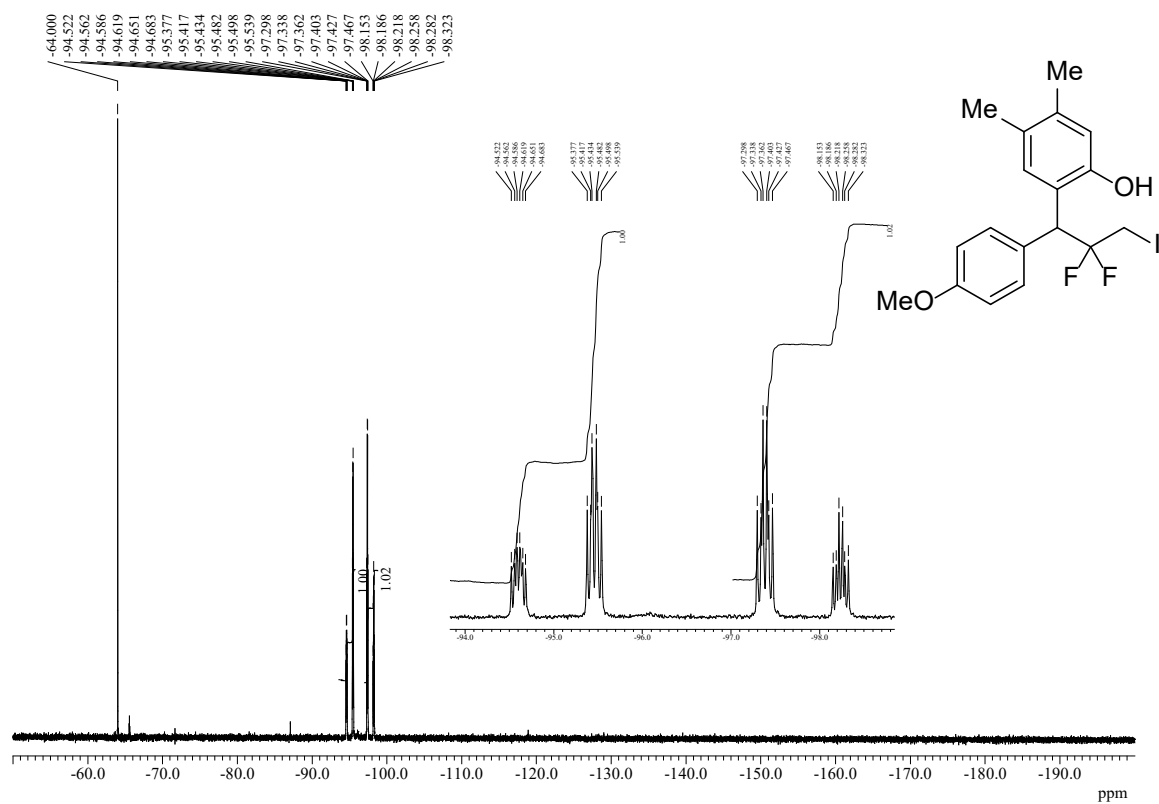

$^1\text{H}$  and  $^{13}\text{C}$  NMR spectra of 4-[3,3-difluoro-4-iodo-2-(4-methoxyphenyl)butan-2-yl]phenol (**8ja**)

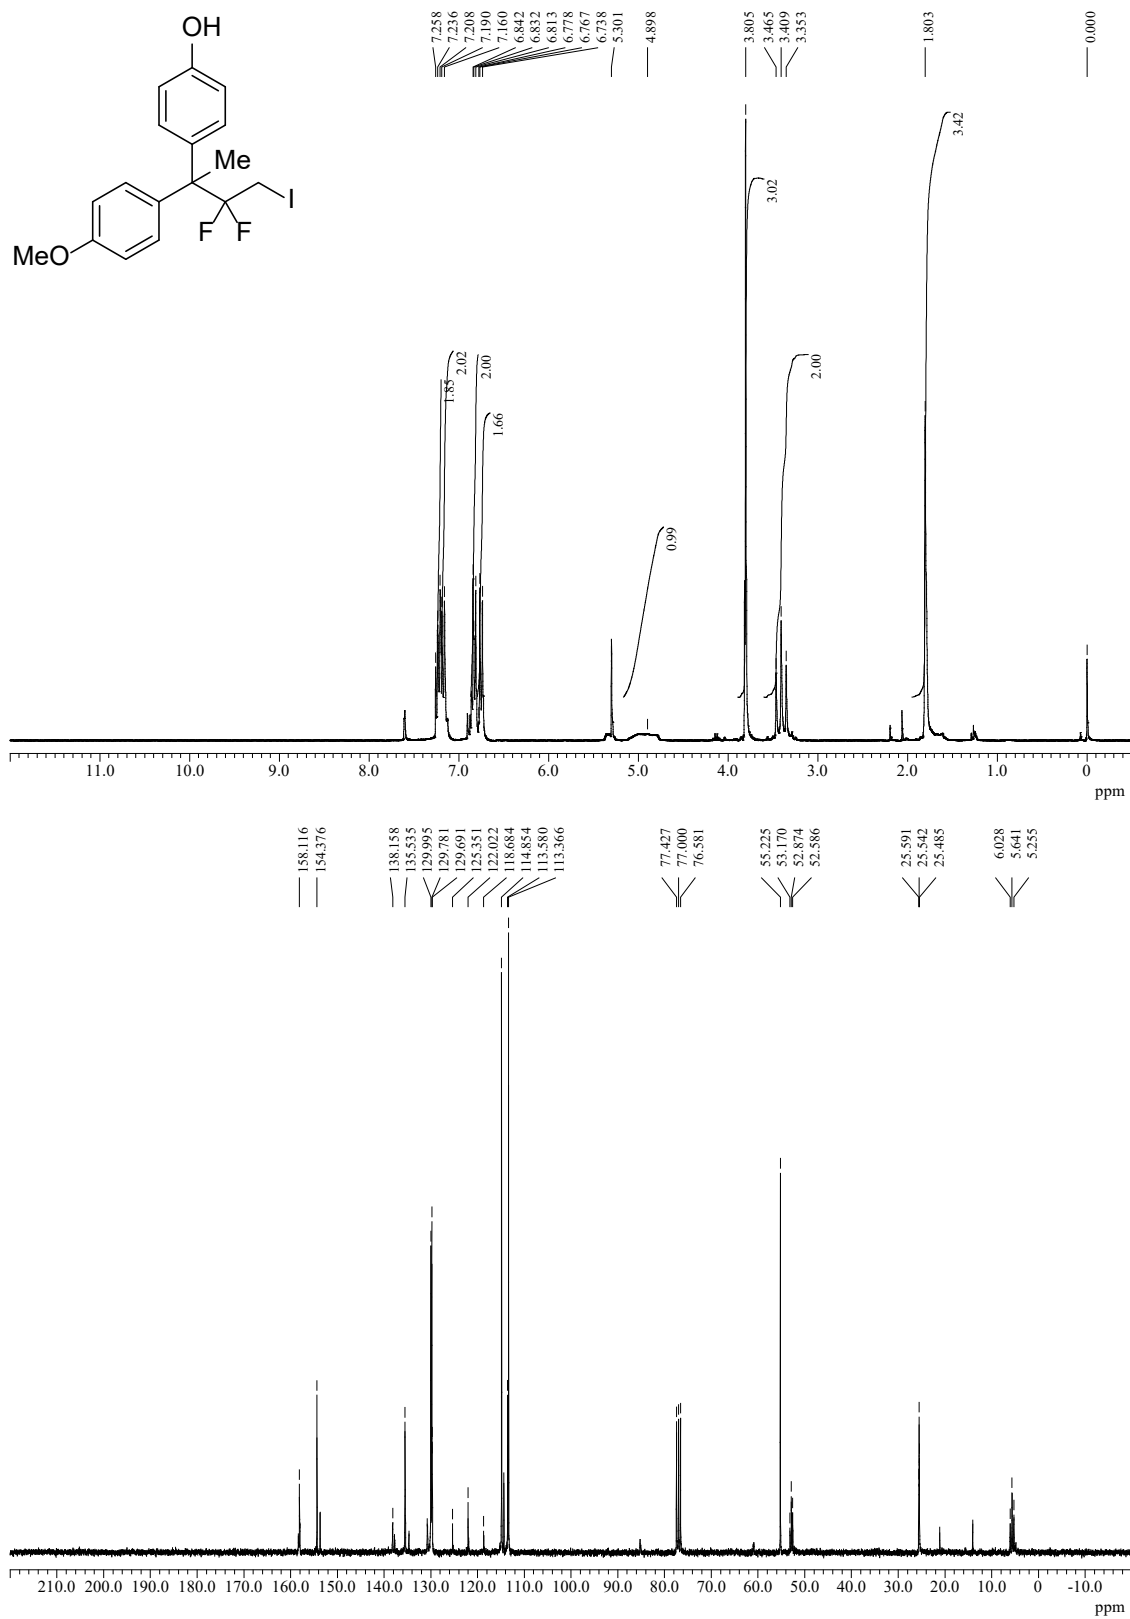

$^{19}\text{F}$  NMR spectrum of 4-[3,3-difluoro-4-iodo-2-(4-methoxyphenyl)butan-2-yl]phenol (**8ja**)

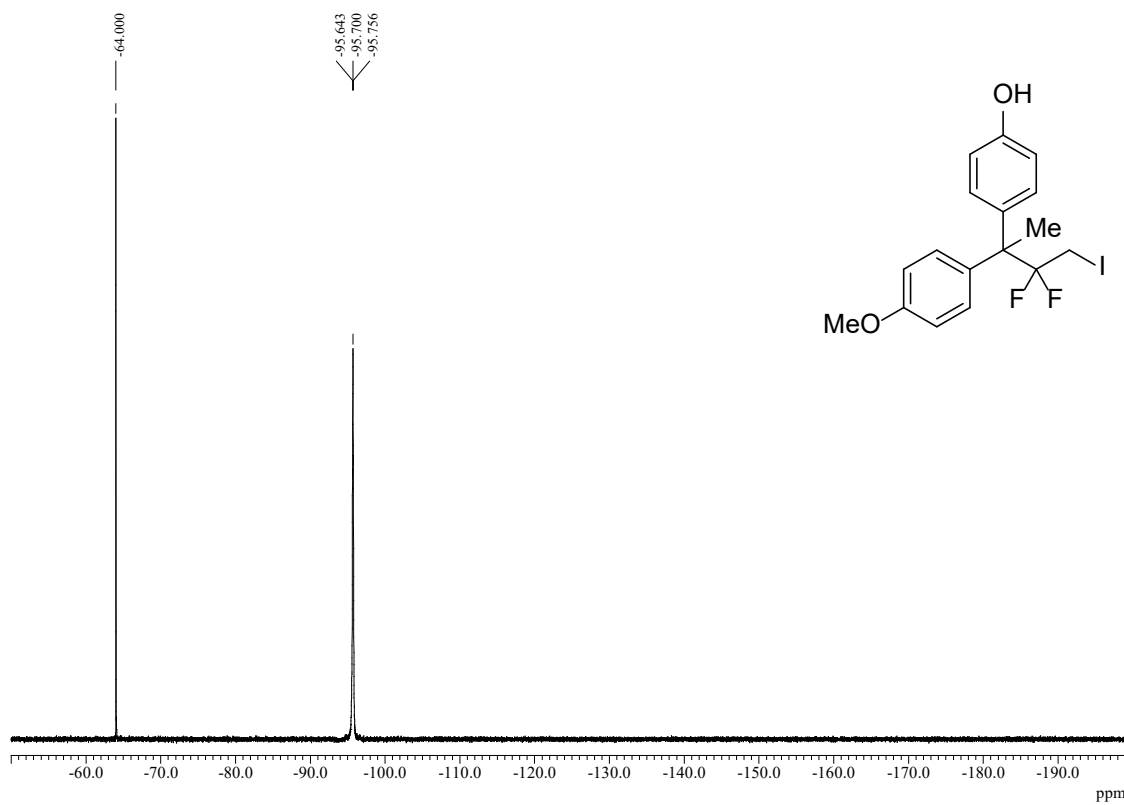

$^1\text{H}$  and  $^{13}\text{C}$  NMR spectra of 4- $\{[1-(4\text{-}i\text{-tert-butylphenyl})-2,2\text{-difluoro-3-iodo}]\text{prop-1-yl}\}$ phenol (**8fa**)

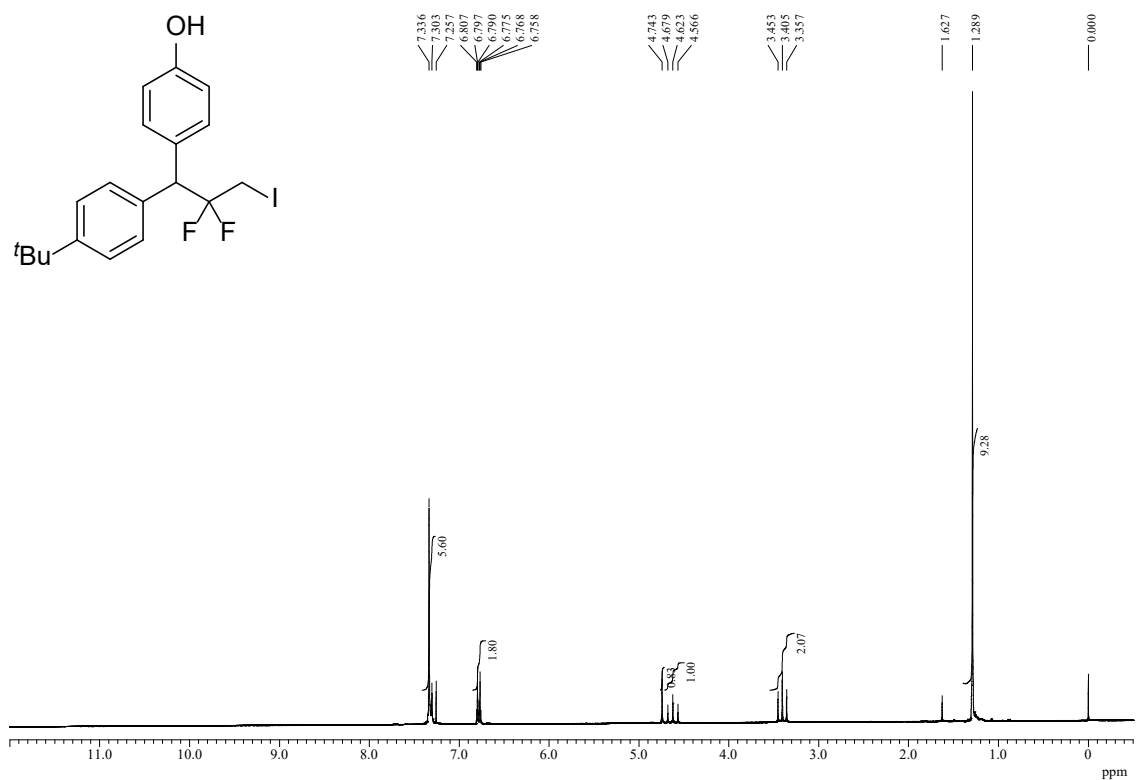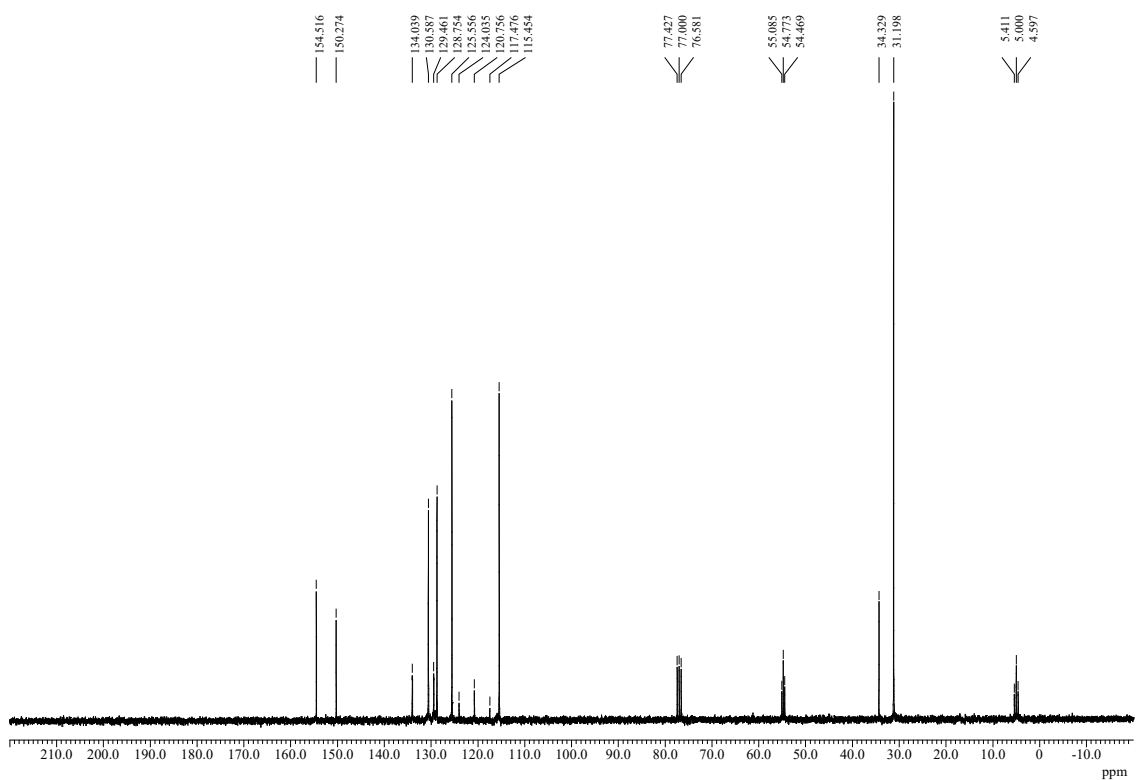

$^{19}\text{F}$  NMR spectrum of 4-[[1-(4-*tert*-butylphenyl)-2,2-difluoro-3-iodo]prop-1-yl]phenol (**8fa**)

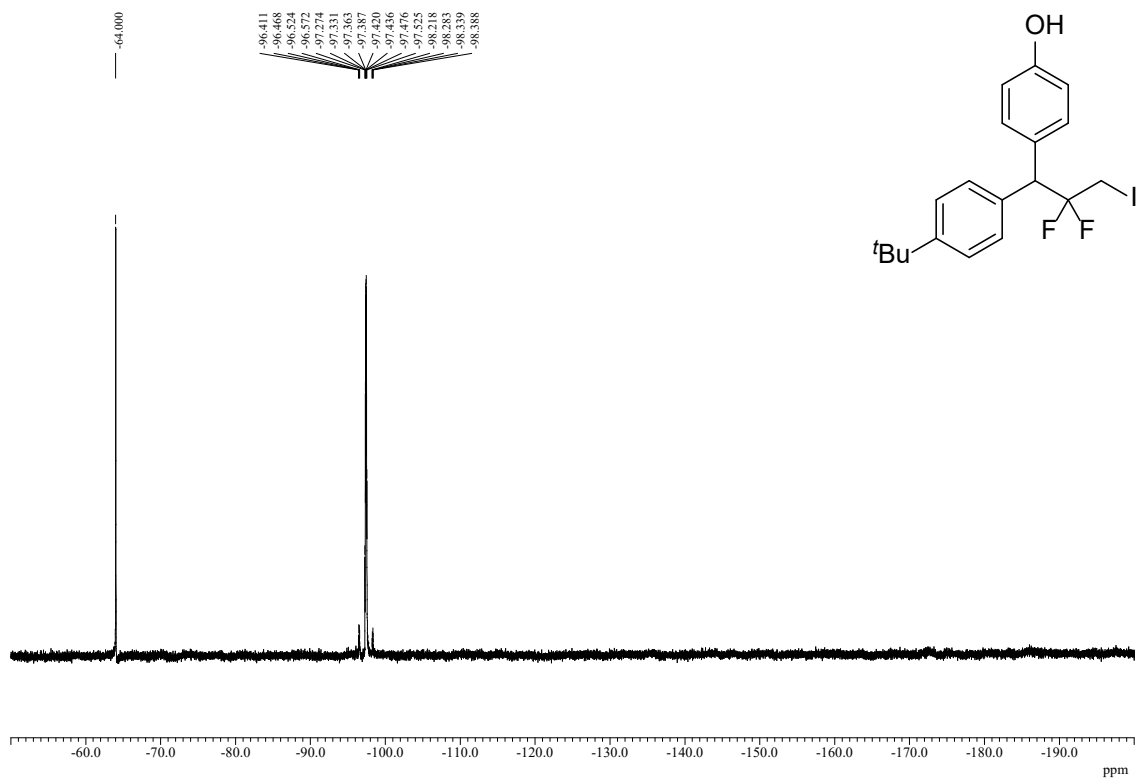

$^1\text{H}$  and  $^{13}\text{C}$  NMR spectra of 2,2-difluoro-1-(4-methoxyphenyl)propane-1,3-diol (**10a**)

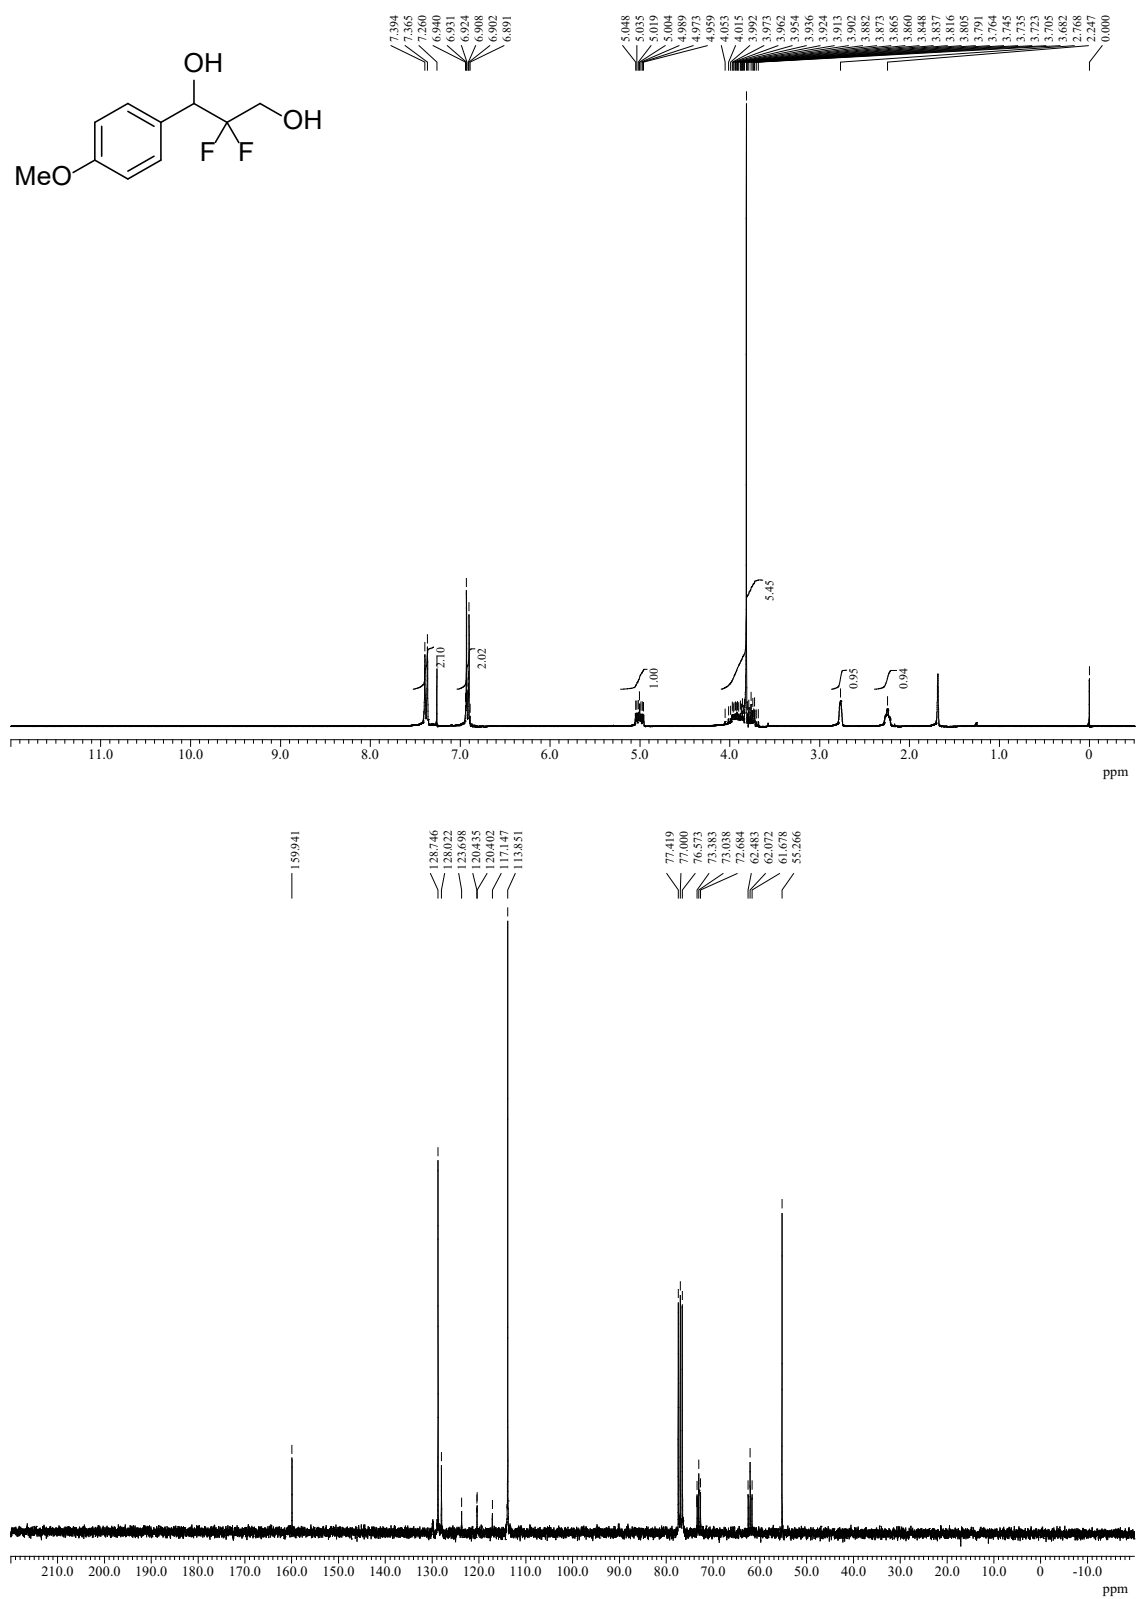

$^{19}\text{F}$  NMR spectrum of 2,2-difluoro-1-(4-methoxyphenyl)propan-1,3-diol (**10a**)

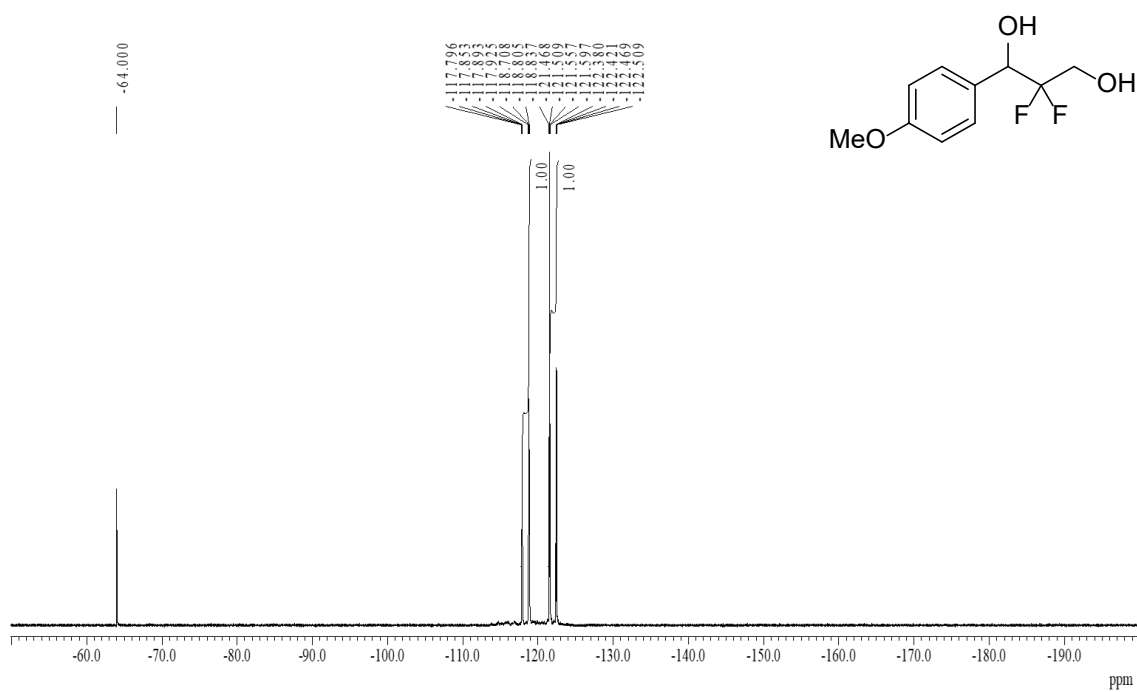

$^1\text{H}$  and  $^{13}\text{C}$  NMR spectra of 2,2-difluoro-3-(4-methoxyphenyl)butan-1,3-diol (**10j**)

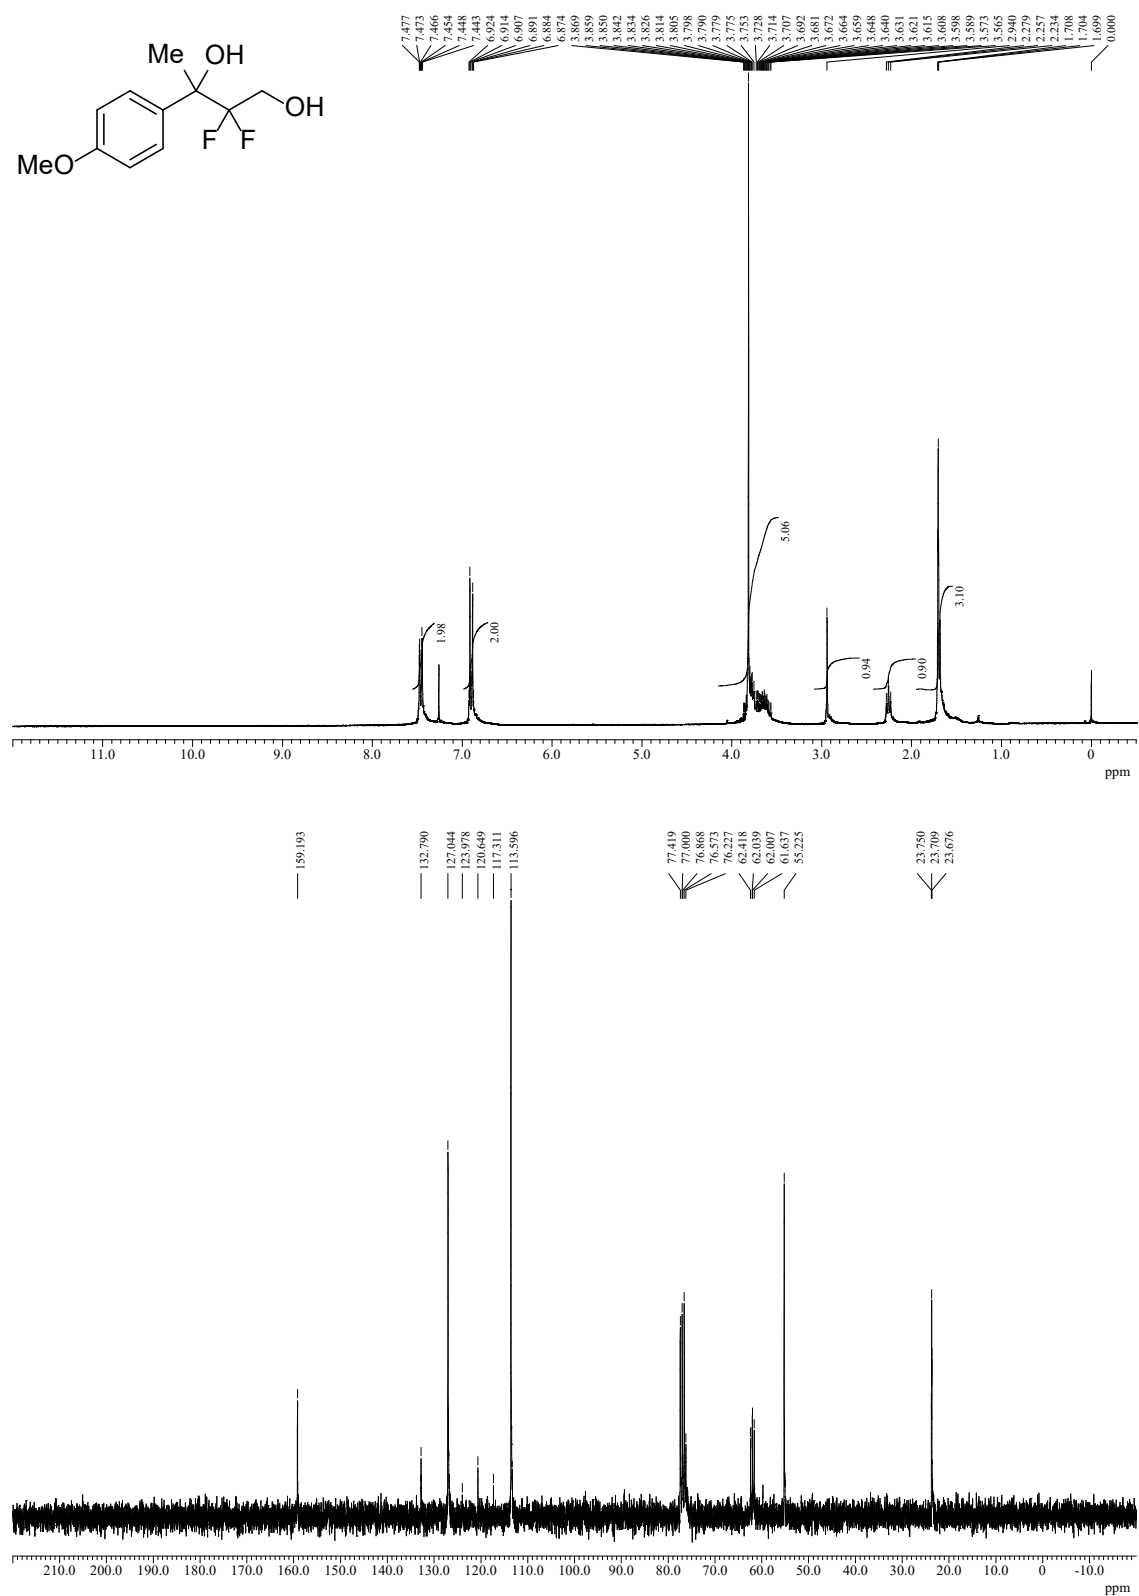



$^{19}\text{F}$  NMR spectrum of 2,2-difluoro-3-(4-methoxyphenyl)butan-1,3-diol (**10j**)

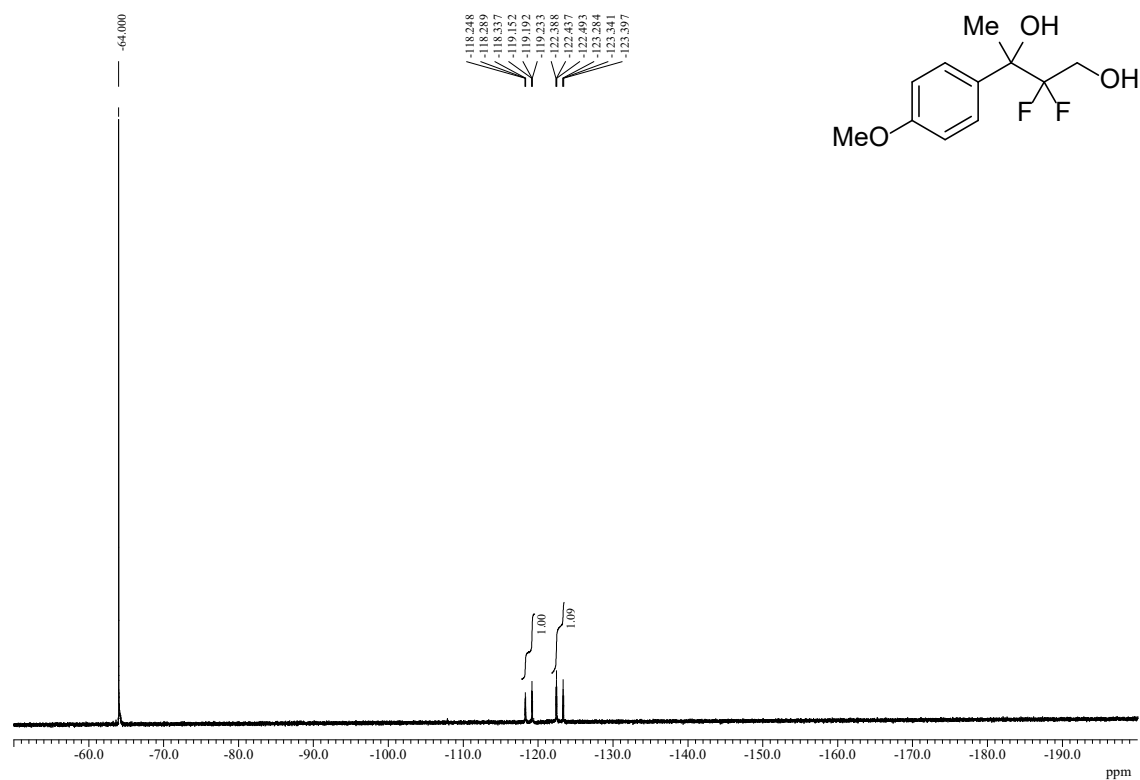

<sup>1</sup>H and <sup>13</sup>C NMR spectra of 3-[2,2-difluoro-3-iodo-1-(4-methoxyphenyl)prop-1-yl]pentan-2,4-dione  
(11)

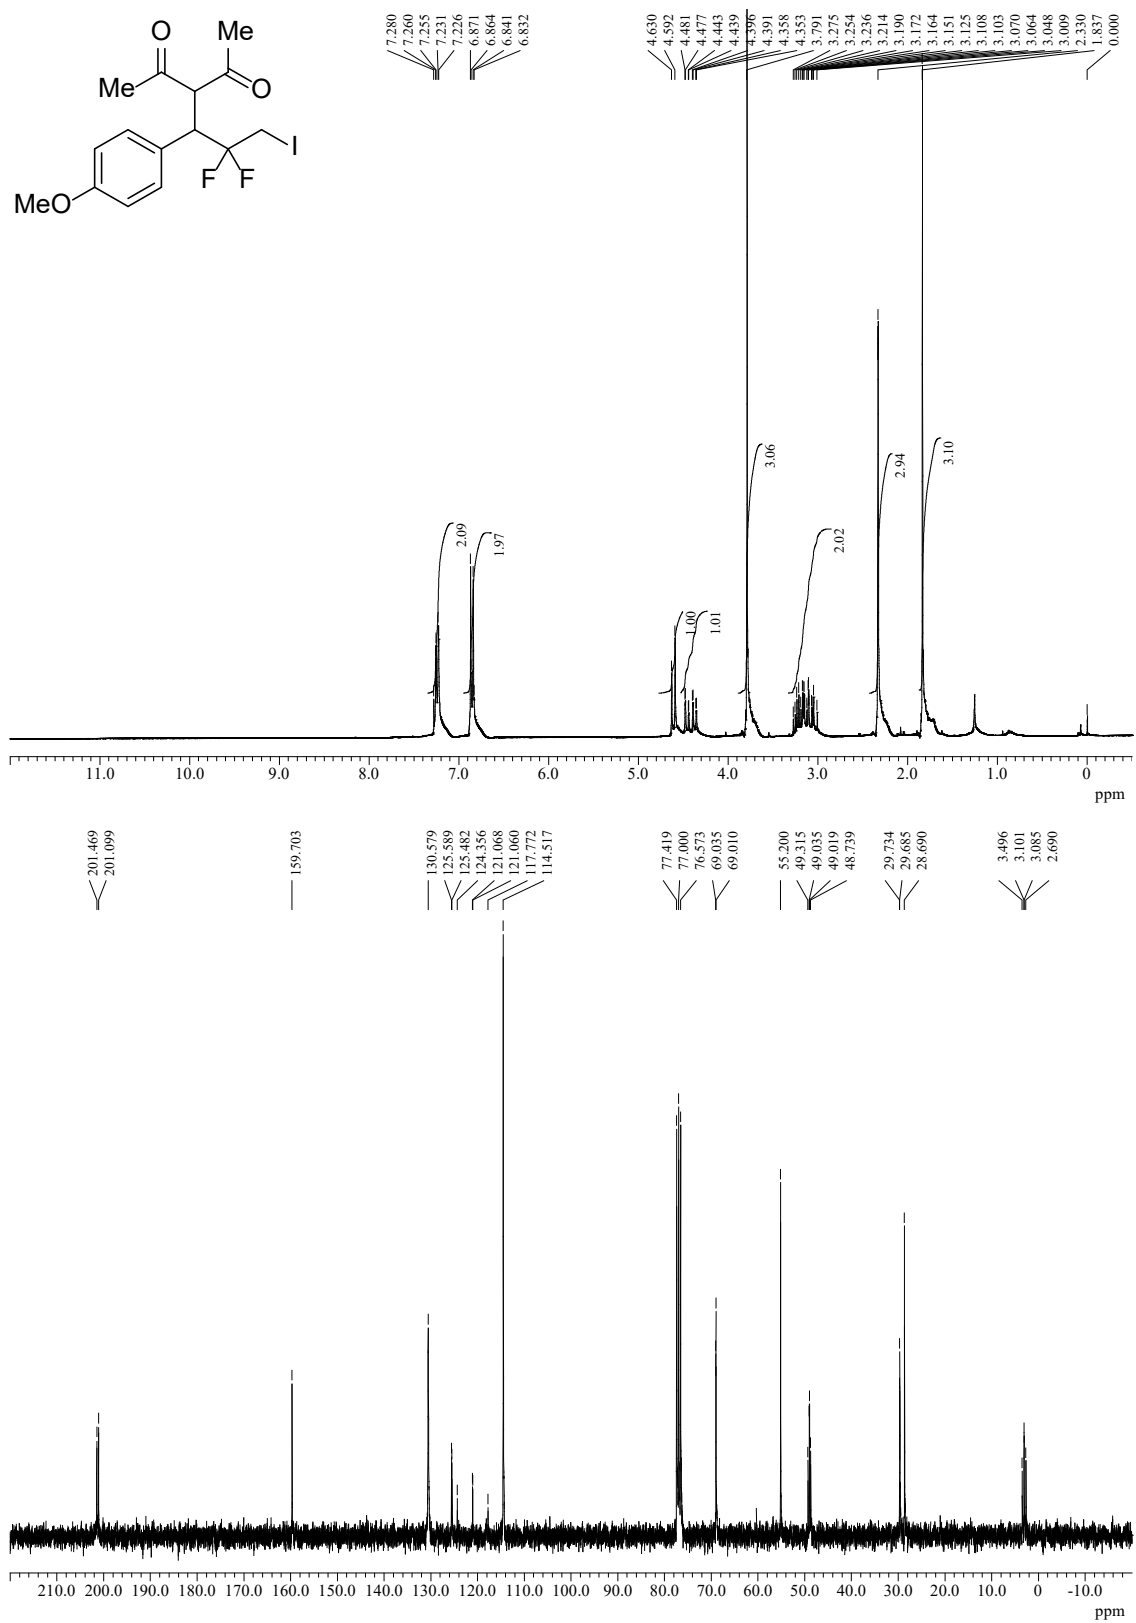

$^{19}\text{F}$  NMR spectrum of 3-[2,2-difluoro-3-iodo-1-(4-methoxyphenyl)prop-1-yl]pentan-2,4-dione (**11**)

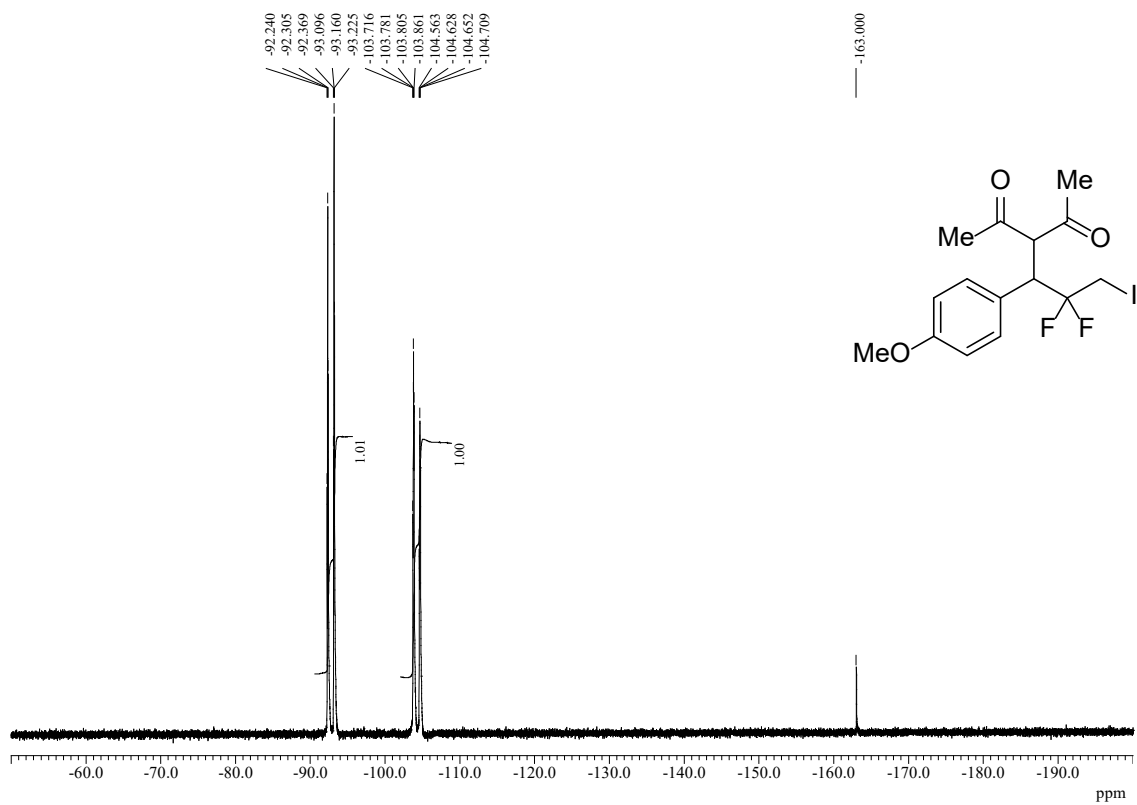

$^1\text{H}$  and  $^{13}\text{C}$  NMR spectra of 1-[3,3-difluoro-4-(4-methoxyphenyl)-6-methyl-3,4-dihydro-2H-pyran-5-yl]ethan-1-one (**12**)

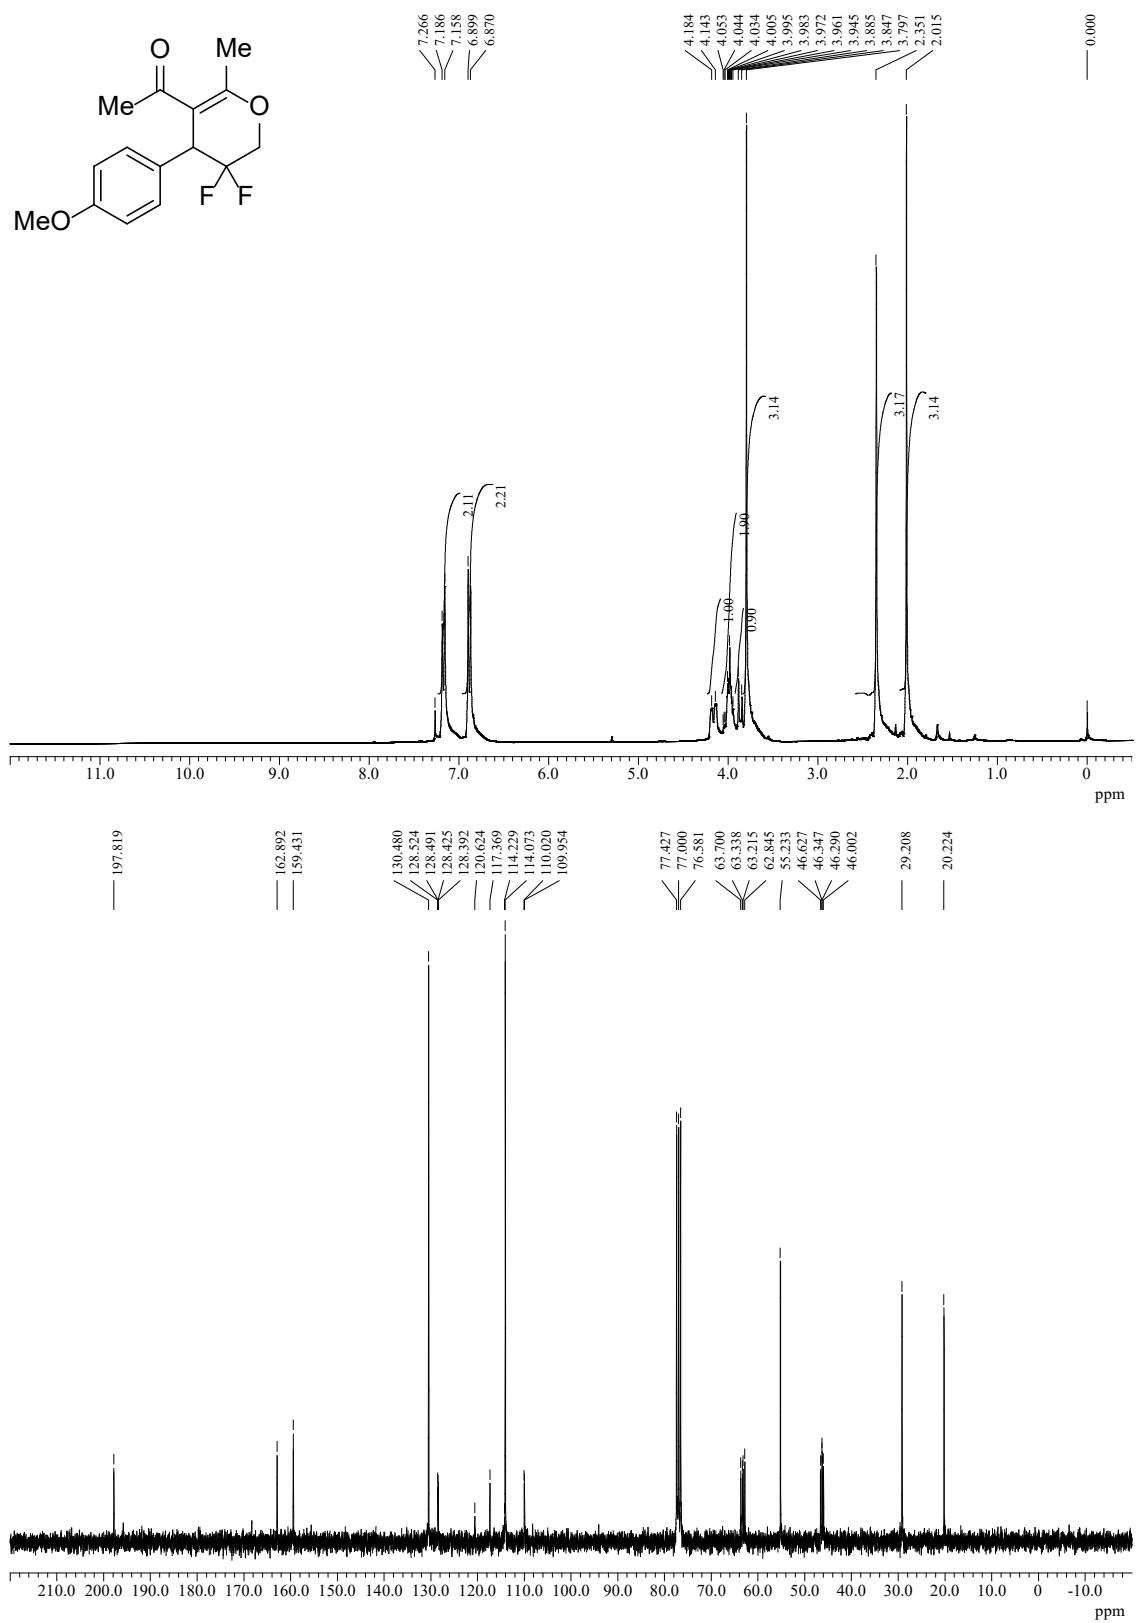

$^{19}\text{F}$  NMR spectrum of 1-[3,3-difluoro-4-(4-methoxyphenyl)-6-methyl-3,4-dihydro-2H-pyran-5-yl]ethan-1-one (**12**)

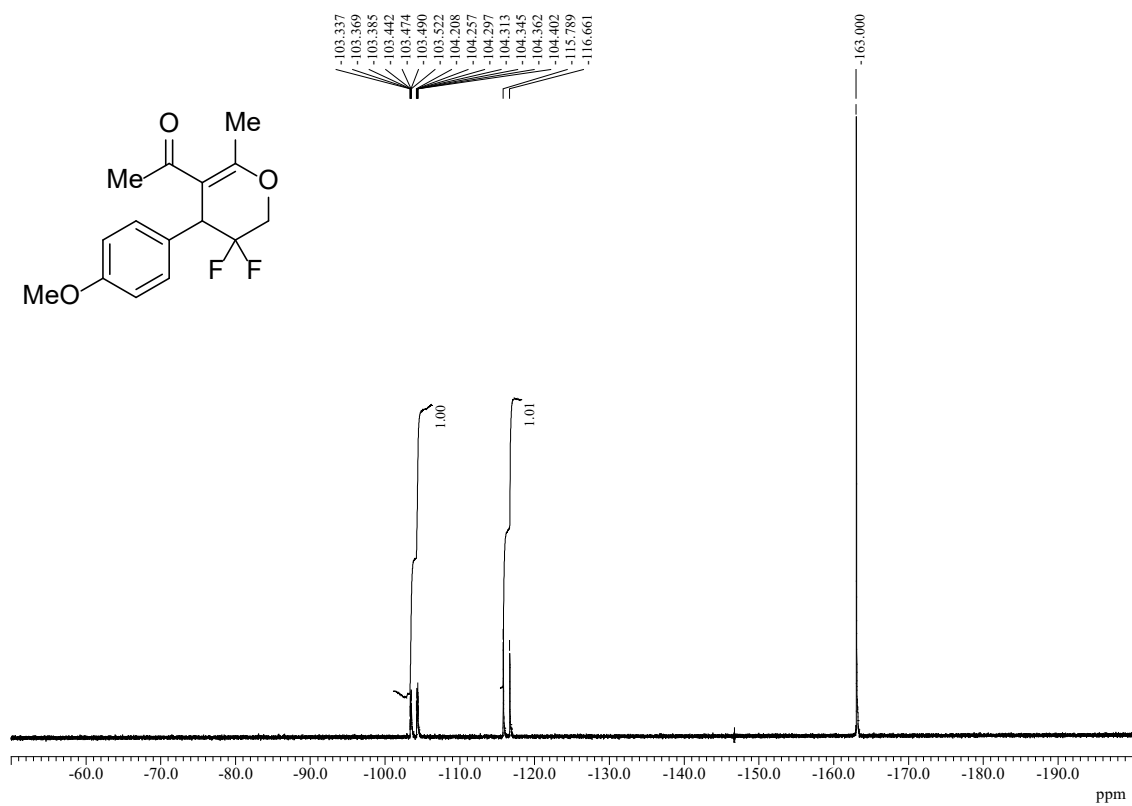

<sup>1</sup>H and <sup>13</sup>C NMR spectra of 3,3-difluoro-2-(4-methoxyphenyl)thietane (**13**)

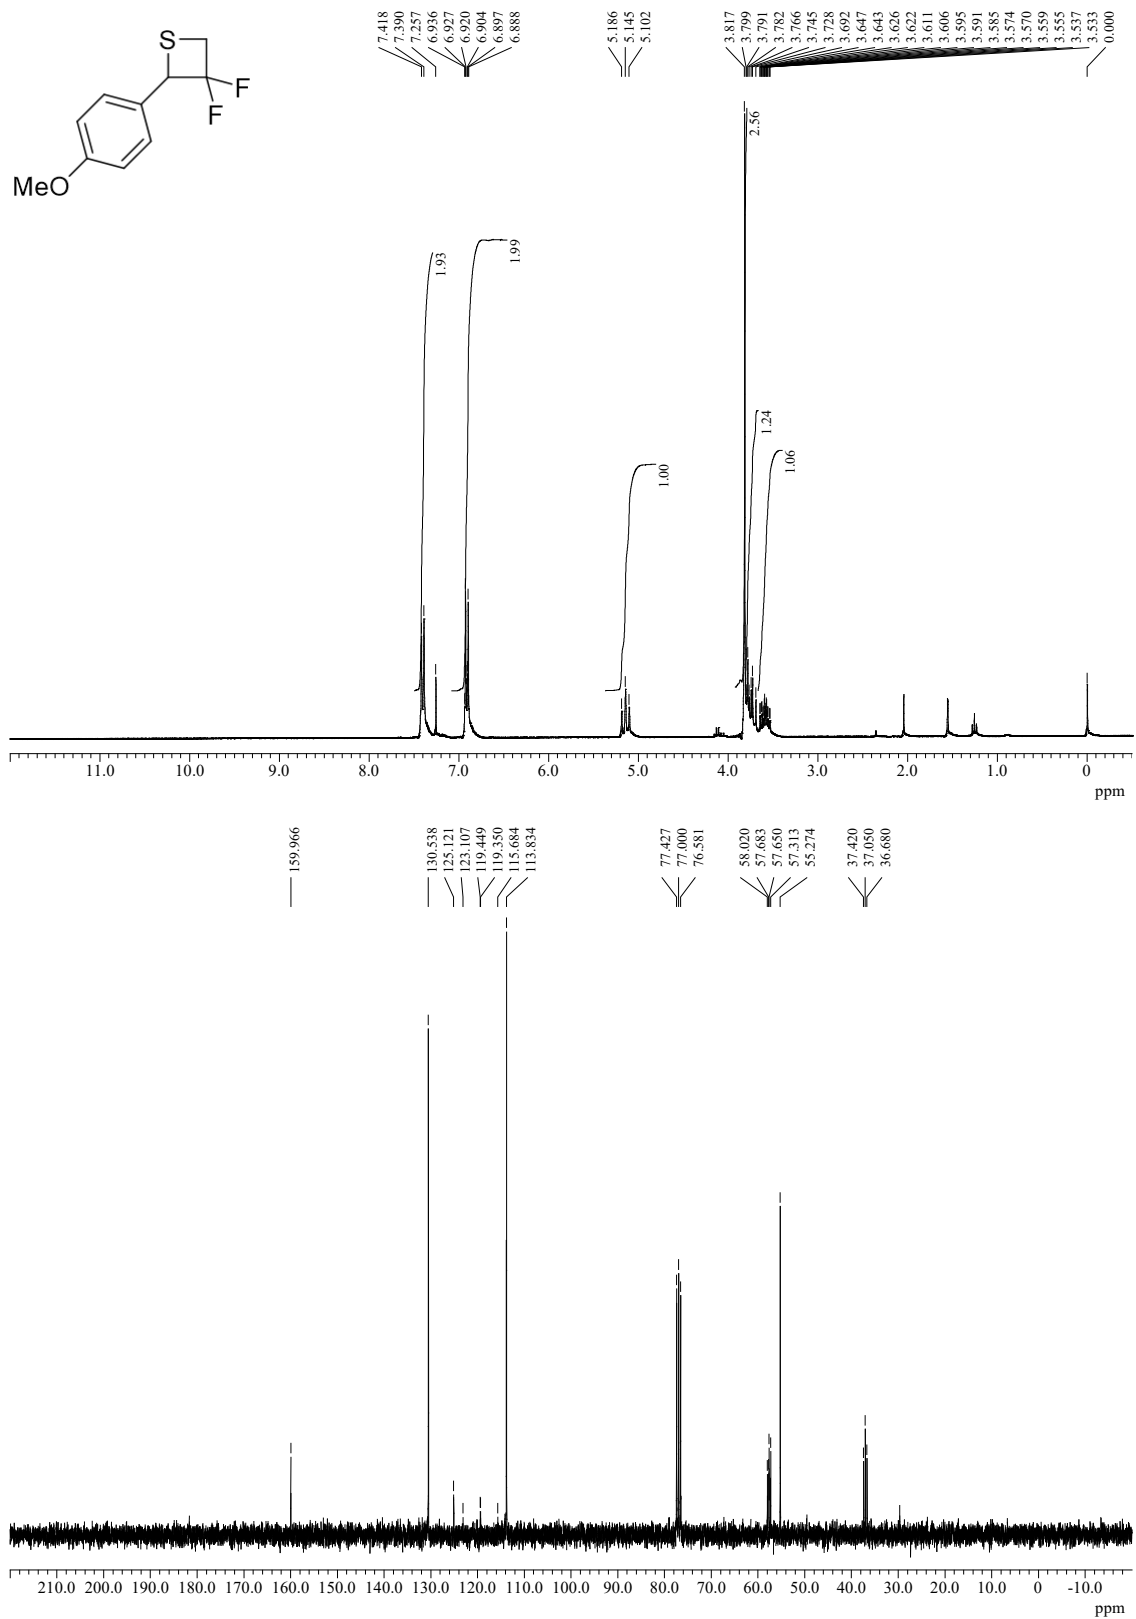

<sup>19</sup>F NMR spectrum of 3,3-difluoro-2-(4-methoxyphenyl)thietane (13)

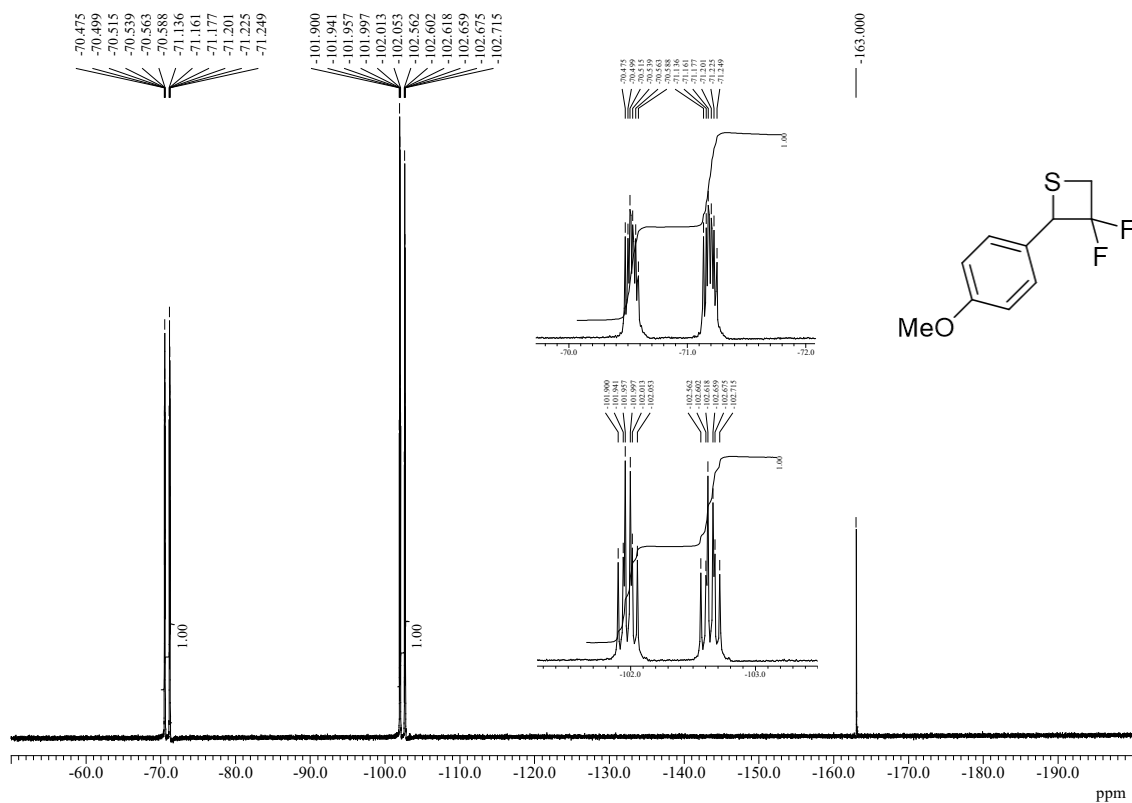

$^1\text{H}$  and  $^{13}\text{C}$  NMR spectra of 3,3-difluoro-4-(4-methoxyphenyl)-6,7-dimethylchromane (**14**)

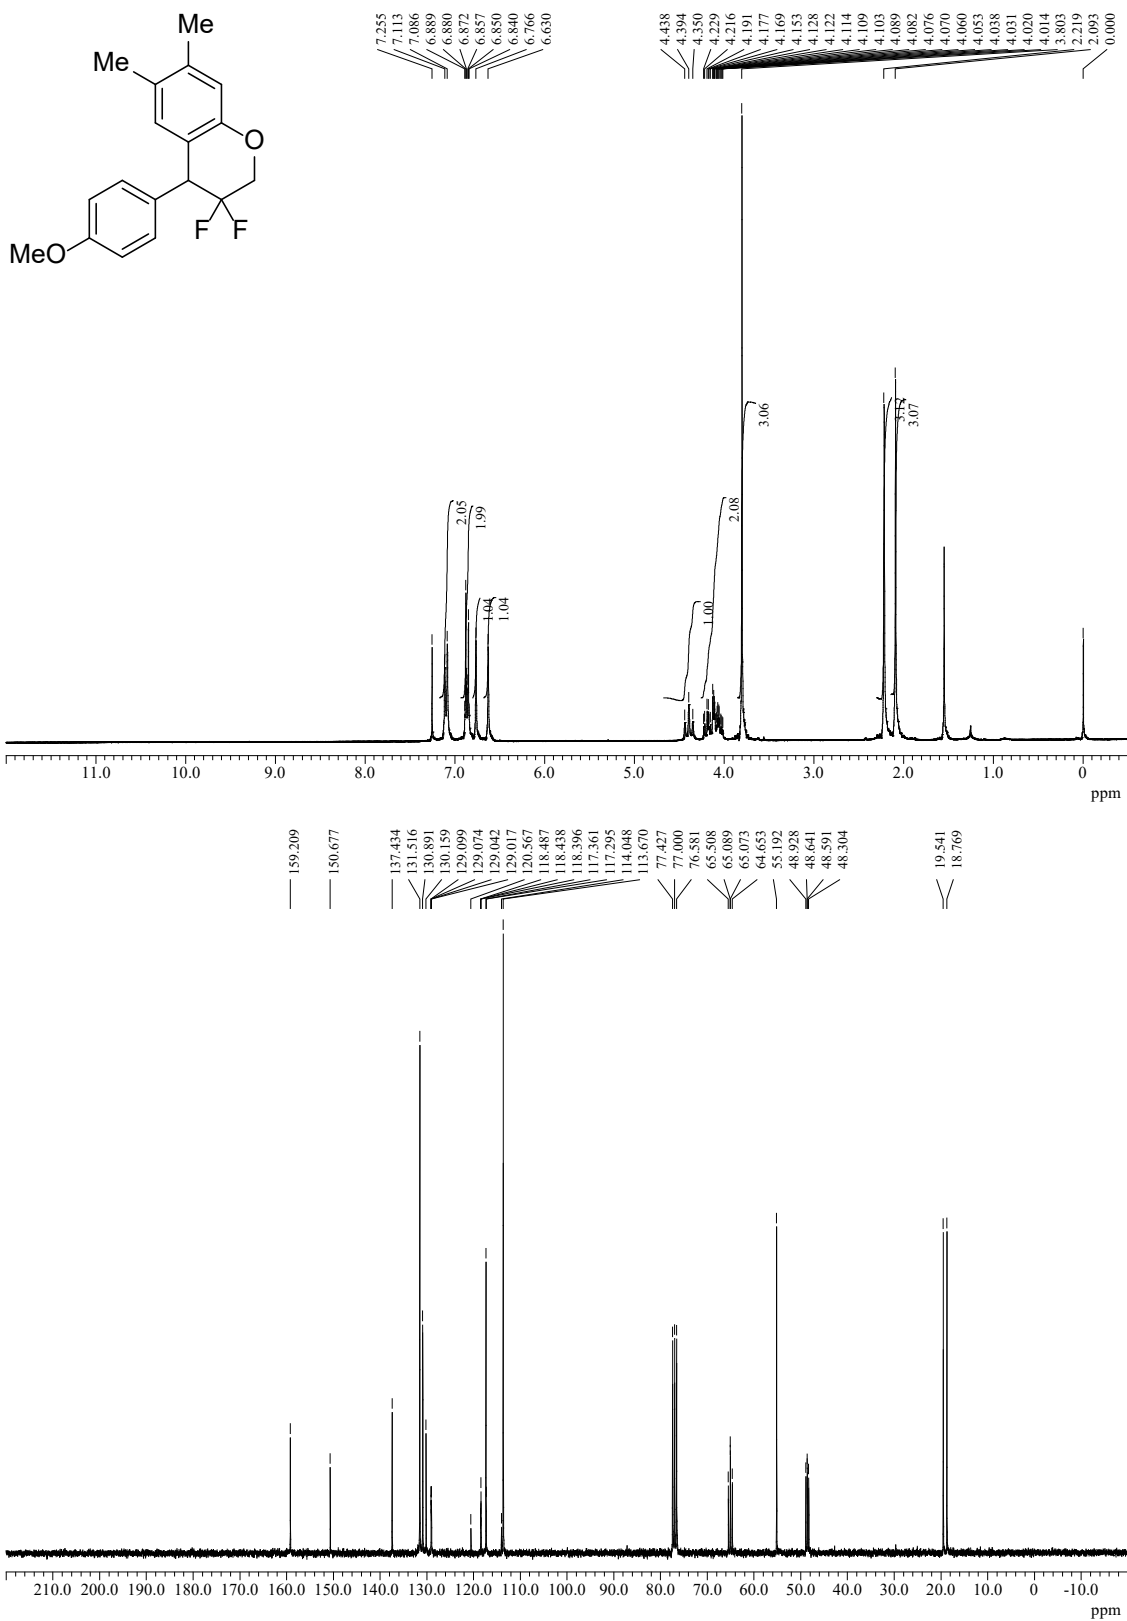



$^{19}\text{F}$  NMR spectrum of 3,3-difluoro-4-(4-methoxyphenyl)-6,7-dimethylchromane (14)

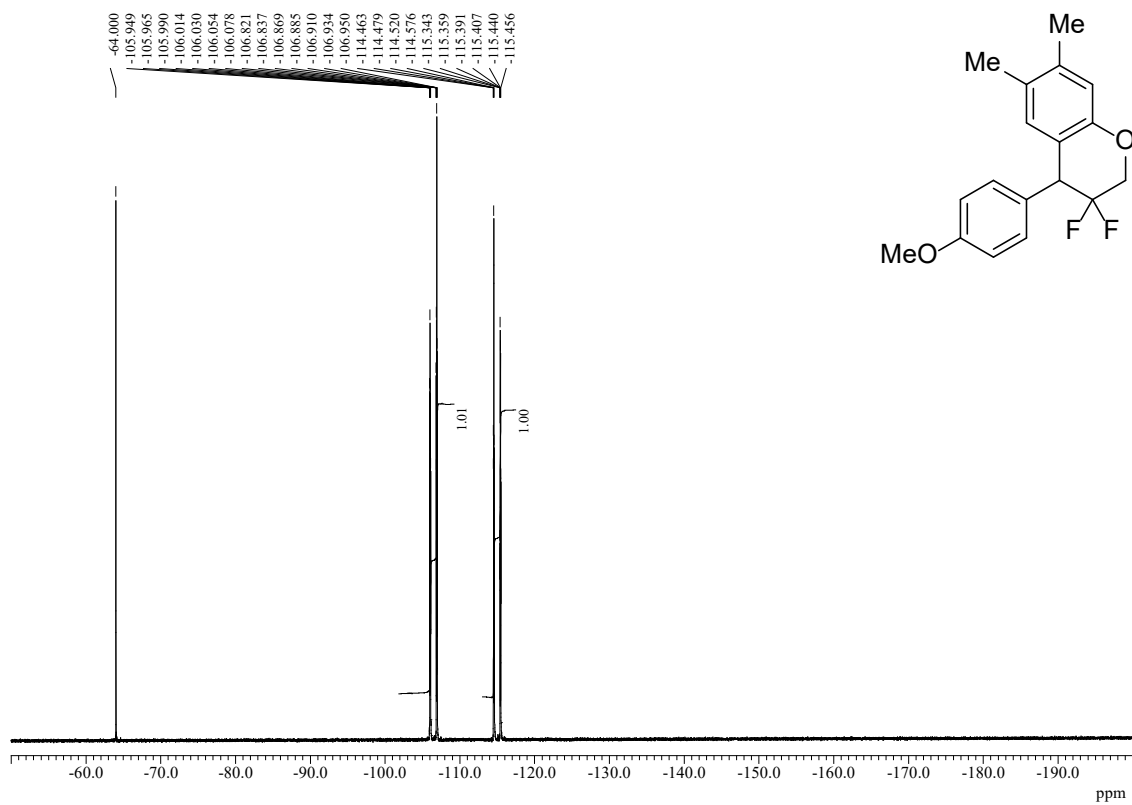

Supplement: d5ob00128e1.pdf [file d5ob00128e1.pdf]
